# Supplementary material for: Validity and effectiveness of paediatric early warning systems and track and trigger tools for identifying and reducing clinical deterioration in hospitalised children: a systematic review
Source: PubMed Central journal article supplement (PMC6502038; doi:10.1136/bmjopen-2018-022105), 2019-05-05
Supplement: bmjopen-2018-022105.draft_revisions.pdf [file bmjopen-2018-022105.draft_revisions.pdf]

# BMJ Open

BMJ Open is committed to open peer review. As part of this commitment we make the peer review history of every article we publish publicly available.

When an article is published we post the peer reviewers' comments and the authors' responses online. We also post the versions of the paper that were used during peer review. These are the versions that the peer review comments apply to.

The versions of the paper that follow are the versions that were submitted during the peer review process. They are not the versions of record or the final published versions. They should not be cited or distributed as the published version of this manuscript.

BMJ Open is an open access journal and the full, final, typeset and author-corrected version of record of the manuscript is available on our site with no access controls, subscription charges or pay-per-view fees (<http://bmjopen.bmj.com>).

If you have any questions on BMJ Open's open peer review process please email [info.bmjopen@bmj.com](mailto:info.bmjopen@bmj.com)

# BMJ Open

## Systematic review of paediatric track and trigger tools for identifying clinical deterioration of children in hospital: their development, validation and effectiveness

|                               |                                                                                                                                                                                                                                                                                                                                                                                                                                                                                                                                                                                                                                                                                                                                                                                                                                                                                                                                                                                                                                                                                                                                                                                                                                                                                           |
|-------------------------------|-------------------------------------------------------------------------------------------------------------------------------------------------------------------------------------------------------------------------------------------------------------------------------------------------------------------------------------------------------------------------------------------------------------------------------------------------------------------------------------------------------------------------------------------------------------------------------------------------------------------------------------------------------------------------------------------------------------------------------------------------------------------------------------------------------------------------------------------------------------------------------------------------------------------------------------------------------------------------------------------------------------------------------------------------------------------------------------------------------------------------------------------------------------------------------------------------------------------------------------------------------------------------------------------|
| Journal:                      | <i>BMJ Open</i>                                                                                                                                                                                                                                                                                                                                                                                                                                                                                                                                                                                                                                                                                                                                                                                                                                                                                                                                                                                                                                                                                                                                                                                                                                                                           |
| Manuscript ID                 | bmjopen-2018-022105                                                                                                                                                                                                                                                                                                                                                                                                                                                                                                                                                                                                                                                                                                                                                                                                                                                                                                                                                                                                                                                                                                                                                                                                                                                                       |
| Article Type:                 | Research                                                                                                                                                                                                                                                                                                                                                                                                                                                                                                                                                                                                                                                                                                                                                                                                                                                                                                                                                                                                                                                                                                                                                                                                                                                                                  |
| Date Submitted by the Author: | 06-Feb-2018                                                                                                                                                                                                                                                                                                                                                                                                                                                                                                                                                                                                                                                                                                                                                                                                                                                                                                                                                                                                                                                                                                                                                                                                                                                                               |
| Complete List of Authors:     | <p>Trubey, Rob; Cardiff University, Centre for Trials Research<br/> Huang, Chao; Cardiff University, Centre for Trials Research<br/> Lugg-Widger, Fiona; Cardiff University, Centre for Trials Research<br/> Hood, Kerenza; Cardiff University, Centre for Trials Research<br/> Allen, Davina; Cardiff University, School of Healthcare Sciences<br/> Edwards, Dawn; Morriston Hospital, Department of Paediatrics<br/> Lacy, David; Wirral University Teaching Hospital<br/> Lloyd, Amy; Cardiff University, Centre for Trials Research<br/> Mann, Mala; Cardiff University, University Library Services<br/> Mason, Brendan; Public Health Wales<br/> Oliver, Alison; Noah's Ark Children's Hospital for Wales, Department of Paediatric Intensive Care<br/> Roland, Damian; Paediatric Emergency Medicine Leicester Academic (PEMLA) Group, Emergency Department<br/> Sefton, G.; Alder Hey Children's NHS Fdn Trust,<br/> Skone, Richard; Noah's Ark Children's Hospital for Wales, Department of Paediatric Intensive Care<br/> Thomas-Jones, Emma; Cardiff University, Centre for Trials Research<br/> Tume, Lyvonne N.; University of the West of England Bristol, Faculty of Health and Applied Sciences (HAS)<br/> Powell, Colin; Children's Hospital for Wales, Paediatrics</p> |
| Keywords:                     | Quality in health care < HEALTH SERVICES ADMINISTRATION & MANAGEMENT, Paediatric intensive & critical care < INTENSIVE & CRITICAL CARE, PAEDIATRICS                                                                                                                                                                                                                                                                                                                                                                                                                                                                                                                                                                                                                                                                                                                                                                                                                                                                                                                                                                                                                                                                                                                                       |
|                               |                                                                                                                                                                                                                                                                                                                                                                                                                                                                                                                                                                                                                                                                                                                                                                                                                                                                                                                                                                                                                                                                                                                                                                                                                                                                                           |

SCHOLARONE™  
Manuscripts

1  
2  
3 **Systematic review of paediatric track and trigger tools for identifying clinical**  
4 **deterioration of children in hospital: their development, validation and effectiveness**  
5

6 **Authors:** Rob Trubey<sup>1†</sup>, Chao Huang<sup>1</sup>, Fiona Lugg-Widger<sup>1</sup>, Kerenza Hood<sup>1</sup>, Davina Allen<sup>2</sup>,  
7 Dawn Edwards<sup>3</sup>, David Lacy<sup>4</sup>, Amy Lloyd<sup>1</sup>, Mala Mann<sup>5</sup>, Brendan Mason<sup>6</sup>, Alison Oliver<sup>7</sup>,  
8 Damian Roland<sup>8</sup>, Gerri Sefton<sup>9</sup>, Richard Skone<sup>7</sup>, Emma Thomas-Jones<sup>1</sup>, Lyvonne Tume<sup>9</sup>,  
9 Colin Powell<sup>10</sup>  
10

11 **1** Centre for Trials Research, Cardiff University, Heath Park, Cardiff, UK

12 **2** School of Healthcare Sciences, Cardiff University, Eastgate House, Cardiff, UK

13 **3** Department of Paediatrics, Morriston Hospital, Swansea, UK

14 **4** Wirral University Teaching Hospital, Wirral, UK

15 **5** Specialist Unit for Review Evidence (SURE), Cardiff University, Heath Park, Cardiff, UK

16 **6** Public Health Wales, Cardiff, UK

17 **7** Department of Paediatric Intensive Care, Children's Hospital for Wales, Cardiff, UK

18 **8** Paediatric Emergency Medicine Leicester Academic (PEMLA) Group, Emergency  
19 Department, Infirmary Square, Leicester, UK

20 **9** Paediatric Intensive Care Unit, Alder Hey Children's NHS Foundation Trust, Liverpool,  
21 UK

22 **10** Department of Child Health, Children's Hospital for Wales, School of Medicine, Cardiff  
23 University, Cardiff, UK  
24

25 **Corresponding author:**

26 Dr. Rob Trubey, Centre for Trials Research, Cardiff University, Heath Park, Cardiff, UK  
27 [trubeyrj@cf.ac.uk](mailto:trubeyrj@cf.ac.uk)  
28

29 **Keywords:** PEWS, track and trigger scores, early warning scores, clinical deterioration,  
30 children, systematic review  
31  
32

33 **Word count:** 3.999  
34  
35  
36  
37  
38  
39  
40  
41  
42  
43  
44  
45  
46  
47  
48  
49  
50  
51  
52  
53  
54  
55  
56  
57  
58  
59  
60

## ABSTRACT

### Objectives

To assess (1) how well validated existing paediatric track and trigger tools (PTTT) are, and (2) how effective paediatric early warning systems (with or without a PTTT) are at reducing mortality and morbidity outcomes in hospitalised children.

### Methods

A systematic search was carried out from inception through September 2016, across several databases. Supplementary searches were carried out to identify published and unpublished literature. Studies reporting on the development, validation and effectiveness of PTTT, or broader early warning systems with or without a PTTT were eligible for inclusion. Study selection, data extraction and quality assessment were conducted by two independent reviewers and disagreements resolved by discussion. PROSPERO registration number CRD42015015326.

### Results

35 validation studies and 24 effectiveness studies were included. They were predominantly carried out in North America, Australia and the UK, and were largely single-site studies conducted in specialist centres. Outcome measures varied considerably. Validation studies were largely retrospective, case-control studies: PTTT either demonstrated high sensitivity or specificity, but not both. Positive predictive value was typically low, suggesting the potential for alarm fatigue. No studies accounted for the co-occurrence of routine clinical intervention and the longitudinal nature of the predictors in evaluating the link between high PTTT scores and subsequent deterioration. Some effectiveness studies showed significant reductions in mortality or morbidity outcomes following introduction of a PTTT, but we consider some methodological issues in interpreting their findings.

### Conclusion

There are a number of fundamental methodological limitations in the PTTT literature, and a predominance of single-site studies carried out in specialist centres limits generalisability. With limited evidence of effectiveness, we would argue that calls to make their use mandatory across all paediatric units are not supported by the evidence base. We discuss

1  
2  
3  
4  
5  
6  
7  
8  
9  
10  
11  
12  
13  
14  
15  
16  
17  
18  
19  
20  
21  
22  
23  
24  
25  
26  
27  
28  
29  
30  
31  
32  
33  
34  
35  
36  
37  
38  
39  
40  
41  
42  
43  
44  
45  
46  
47  
48  
49  
50  
51  
52  
53  
54  
55  
56  
57  
58  
59  
60

future research requirements, including the need to understand the impact of PTTT implementation on the wider clinical microsystem.

For peer review only

## STRENGTHS AND LIMITATIONS OF THIS STUDY

- Paediatric track and trigger tools (PTTT) are increasingly used by paediatric units across Europe, North America and Australia – this study is a timely review of the evidence for their validity and effectiveness
- A comprehensive search was carried out across multiple databases and included published as well as grey literature
- The review highlights the weaknesses in the current evidence base and makes suggestions for future research
- Inconsistencies in study populations and outcome measures make comparisons across studies and PTTT difficult
- The generalisability of the PTTT findings is limited by the predominance of single-site studies conducted in specialist centres, and a reliance on retrospective and before-and-after studies

## BACKGROUND

Failure to recognise and respond to clinical deterioration in hospitalised children is a major safety concern in healthcare. The underlying causes of this problem are clearly multi-factorial<sup>1-3</sup> but ‘early warning scores’ or ‘track and trigger tools’ have been strongly advocated as one approach to improving recognition of deterioration in paediatric units<sup>1,2,4</sup>.

These scores or tools, now commonly employed in adult care, provide a framework for evaluating a child’s routine physiological and behavioural signs for early indicators of potential deterioration. If one or more observations fall outside of an age-specific threshold, bedside staff are required to escalate care accordingly<sup>4</sup>. Consequently, they can be considered a form of clinical prediction tool, “intended to guide clinicians in their everyday decision making”<sup>5</sup>. They have been referred to in the literature using a number of different terms: paediatric early warning scores or systems (PEWS); paediatric early warning tools (PEWT), track and trigger tools (TTT) and many others. Here, we refer to them using the umbrella term ‘paediatric track and trigger tools’ (PTTT).

Several different PTTT have been developed, typically by teams based in specialist paediatric centres and designed to be used alongside a rapid response team (RRT). However, their advocacy has recently led to widespread uptake across a variety of different paediatric units, including many non-specialist centres where patient populations and resources may differ. In the United Kingdom (UK), for instance, a recent cross-sectional survey found that 85% of paediatric units were using some form of PTTT, the vast majority of which were non-specialist centres without an RRT<sup>6</sup>. Clinical prediction rules should be subjected to a number of evaluation phases before being implemented in practice: derivation and development, narrow and broad validation and impact analysis<sup>7</sup>. It is unclear whether any of the PTTT in use across paediatric units have followed this process: two recent systematic reviews of published PTTT were critical of the evidence-base, focusing on the lack of evidence for their effectiveness for improving patient outcomes<sup>8,9</sup>. Although there is a growing literature base considering adult track and trigger tools, the generalisability of these findings to paediatrics is limited by differences in the nature of deterioration in adult and paediatric in-patients. The current review aimed to build on the existing paediatric work, assessing in depth the evidence base for both the validation and impact of PTTT through two research questions:

- Question 1: How well validated are existing paediatric track and trigger scores and their component parts?

- 1
  - 2
  - 3
  - 4
  - 5
  - 6
  - 7
  - 8
  - 9
  - 10
  - 11
  - 12
  - 13
  - 14
  - 15
  - 16
  - 17
  - 18
  - 19
  - 20
  - 21
  - 22
  - 23
  - 24
  - 25
  - 26
  - 27
  - 28
  - 29
  - 30
  - 31
  - 32
  - 33
  - 34
  - 35
  - 36
  - 37
  - 38
  - 39
  - 40
  - 41
  - 42
  - 43
  - 44
  - 45
  - 46
  - 47
  - 48
  - 49
  - 50
  - 51
  - 52
  - 53
  - 54
  - 55
  - 56
  - 57
  - 58
  - 59
  - 60
- Question 2: How effective are paediatric early warning systems (with or without a PTTT) at reducing mortality and critical events?

For peer review only



## METHODS

This systematic review was conducted and reported in accordance with the Preferred Reporting Items for Systematic Review and Meta-Analyses (PRISMA) guidelines<sup>10</sup>. Our review is registered with the PROSPERO database CRD42015015326.

### Search strategy

A comprehensive search was conducted across a range of databases to identify relevant studies in the English language. Both published and unpublished literature was considered where publicly available, as were studies in press. The following databases were searched from inception through September 2016: British Nursing Index, CINAHL (Cumulative Index of Nursing and Allied Health Literature), Cochrane Central Register of Controlled Trials, Database of Abstracts of Reviews of Effectiveness, EMBASE, HMIC (Health Management Information Centre), Medline, Medline in Process, Scopus and Web of Knowledge (Science Citation Indexes). To identify additional papers, published, unpublished or research reported in the grey literature a range of relevant websites and trial registers were searched including ClinicalTrials.gov. To identify published papers that had not yet been catalogued in the electronic databases, recent editions of key journals were hand-searched. The search terms included 'early warning scores', 'alert criteria', 'rapid response', 'track and trigger' and 'early medical intervention'. Further details are supplied in supplementary table 1.

### Eligibility criteria and study selection

Studies reporting the development and validation of PTTT and/or the effectiveness of broader early warning systems at reducing mortality and critical events in paediatric units up until September 2016 were eligible for inclusion. The review included studies with children aged 0-18 who were in-patients in a hospital.

Outcome measures were mortality and critical events, including: unplanned admission to a higher level of care, cardiac arrest, respiratory arrest, medical emergencies requiring immediate assistance, children reviewed by Paediatric Intensive Care Unit (PICU) staff on the ward (in specialist centres) or reviewed by external PICU staff (for non-specialist centres), acuity at PICU admission and the receipt of critical interventions at ward or PICU level.

1  
2  
3 Two of the review authors independently screened the titles and abstracts yielded in the  
4 search. Full texts were then reviewed independently by six reviewers against the eligibility  
5 criteria and were assigned to the relevant review question. Reasons for exclusion were  
6 recorded.  
7  
8

9  
10 A data extraction form was developed for the two questions which had some common  
11 elements relating to both research questions (study design, country, setting, study population,  
12 exact nature of the PTTT or early warning system, statistical techniques used, outcomes  
13 assessed). Additional data items for validation studies included the items in the PTTT,  
14 modifications to the PTTT from previous versions, predictive ability of individual items and  
15 the overall tool, sensitivity and specificity and inter and intra-rater reliability. Effectiveness  
16 studies included an assessment of outcomes in terms of mortality and various morbidity  
17 variables. Data extraction was carried out by two reviewers and discrepancies were resolved  
18 by discussion. The methodological quality of the included studies was assessed using a  
19 modified version of the Downs and Black rating scale<sup>11</sup>.  
20  
21  
22  
23  
24  
25  
26  
27  
28  
29  
30  
31  
32  
33  
34  
35  
36  
37  
38  
39  
40  
41  
42  
43  
44  
45  
46  
47  
48  
49  
50  
51  
52  
53  
54  
55  
56  
57  
58  
59  
60

## REVIEW RESULTS

Figure 1 shows the PRISMA flow diagram.

<Figure 1 here>

### Study characteristics

Table 1 summarises the study characteristics of the 35 validation (Question 1) and 24 effectiveness (Question 2) papers included in the review, with full details in supplementary table 2 and 3.

| Validation studies (n=35)    |    |      | Effectiveness studies (n=24)   |    |      |
|------------------------------|----|------|--------------------------------|----|------|
|                              | n  | %    |                                | n  | %    |
| <b>Type</b>                  |    |      | <b>Type</b>                    |    |      |
| Full text                    | 22 | 62.9 | Full text                      | 16 | 66.7 |
| Abstract                     | 13 | 37.1 | Abstract                       | 8  | 33.3 |
|                              |    |      |                                |    |      |
| <b>Country</b>               |    |      | <b>Country</b>                 |    |      |
| United States                | 21 | 60.0 | United States                  | 14 | 58.3 |
| United Kingdom               | 12 | 34.3 | United Kingdom                 | 3  | 12.5 |
| Canada                       | 3  | 8.6  | Canada                         | 2  | 8.3  |
| Australia                    | 0  | 0.0  | Australia                      | 3  | 12.5 |
| Other                        | 6  | 17.1 | Other                          | 2  | 8.3  |
|                              |    |      |                                |    |      |
| <b>Year of study</b>         |    |      | <b>Year of study</b>           |    |      |
| Pre-2012                     | 11 | 31.4 | Pre-2012                       | 14 | 58.3 |
| 2012                         | 4  | 11.5 | 2012                           | 1  | 4.2  |
| 2013                         | 6  | 17.1 | 2013                           | 2  | 8.3  |
| 2014                         | 5  | 14.3 | 2014                           | 6  | 25.0 |
| 2015                         | 7  | 20.0 | 2015                           | 0  | 0.0  |
| 2016                         | 2  | 5.7  | 2016                           | 1  | 4.2  |
|                              |    |      |                                |    |      |
| <b>Setting</b>               |    |      | <b>Setting</b>                 |    |      |
| Specialist / tertiary        | 32 | 91.4 | Specialist / tertiary          | 23 | 95.8 |
| Non-specialist / community   | 0  | 0.0  | Non-specialist / community     | 1  | 4.2  |
| Unclear                      | 3  | 8.6  | Unclear                        | 0  | 0.0  |
|                              |    |      |                                |    |      |
| <b>Single / multi-centre</b> |    |      | <b>Single / multi-centre</b>   |    |      |
| Single-centre                | 34 | 97.1 | Single-centre                  | 23 | 95.8 |
| Multi-centre                 | 1  | 2.9  | Multi-centre                   | 1  | 4.2  |
|                              |    |      |                                |    |      |
| <b>Study population</b>      |    |      | <b>Study population</b>        |    |      |
| General in-patients          | 23 | 65.7 | General in-patients            | 16 | 66.7 |
| Specialist population        | 10 | 28.6 | Specialist population          | 3  | 12.5 |
| Unclear                      | 2  | 5.7  | Unclear                        | 5  | 19.2 |
|                              |    |      |                                |    |      |
| <b>Study design</b>          |    |      | <b>Study design / analysis</b> |    |      |
| Cohort                       | 7  | 20.0 | Before & after                 | 24 | 92.4 |
| Case-control                 | 18 | 51.4 | Interrupted Time Series        | 2  | 7.6  |
| Case / chart review          | 9  | 25.7 |                                |    |      |
| Pilot study                  | 1  | 2.9  |                                |    |      |

1  
2  
3 **Table 1: Summary study characteristics of validation and effectiveness papers in the review**  
4  
5  
6

7 **Question 1 – How well validated are PTTT and component parts?**  
8

9 *Types of PTTT and components*  
10

11 A range of different PTTT were identified in the validation studies, but the vast majority were  
12 based on four different PTTT: the Brighton PEWS<sup>12–21</sup>, the Bedside PEWS (and its  
13 predecessor, the ‘Paediatric Early Warning System score’)<sup>18,22–30</sup>, the Bristol PEWT<sup>3,28,31–35</sup>  
14 and the Melbourne Activation Criteria (including a modification, the Cardiff & Vale  
15 PEWS)<sup>3,36,37</sup>. Of the four most commonly cited tools, two are originally single-item triggering  
16 systems, where escalation of care is prompted by any one abnormal parameter (Bristol  
17 PEWS, Melbourne Activation Criteria) and two are aggregate-score systems, where the  
18 number of abnormal parameters are summed, typically with a graded escalation plan  
19 associated with different scoring thresholds (Bedside PEWS, Bristol PEWT). Modifications  
20 to existing PTTT were common, including the addition or removal of scoring items,  
21 adjustments to scoring or triggering thresholds (often tailored to specialist unit populations)  
22 and adjustments to the escalation procedure or ‘algorithm’ linked to the aggregate score.  
23 Other PTTT referenced included the National Health Service Institute for Innovation and  
24 Improvement (NHS III) PEWS<sup>38</sup>, the most commonly used PTTT in United Kingdom  
25 paediatric settings<sup>6</sup>, and a small number of prediction algorithms which draw on electronic  
26 health records<sup>18,39</sup>.  
27

28 While their underlying mechanisms differ, there was significant crossover between the  
29 various tools in terms of physiological and behavioural components (Table 2). Notably, each  
30 PTTT requires a minimum of seven recorded parameters to assess potential deterioration. The  
31 thresholds at which each of the vital signs or observations triggered or contributed to an  
32 aggregate score varied between PTTT. Most tools use age-adjusted thresholds for  
33 establishing abnormal vital signs, derived by either consensus-based or evidence-based  
34 means.  
35  
36  
37  
38  
39  
40  
41  
42  
43  
44  
45  
46  
47  
48  
49  
50  
51  
52  
53  
54  
55  
56  
57  
58  
59  
60

| Required vital signs or observations for scoring | Bedside PEWS | Brighton PEWS | Bristol PEWT | Melbourne Activation Criteria |
|--------------------------------------------------|--------------|---------------|--------------|-------------------------------|
| Respiratory rate                                 | ✓            | ✓             | ✓            | ✓                             |
| Heart rate                                       | ✓            | ✓             | ✓            | ✓                             |
| Respiratory effort / distress                    | ✓            | ✓             | ✓            | ✓                             |
| Level of consciousness / behaviour               |              | ✓             | ✓            | ✓                             |
| Oxygen saturation                                | ✓            |               | ✓            | ✓                             |
| Capillary refill time                            | ✓            | ✓             | ✓            |                               |
| Oxygen therapy                                   | ✓            | ✓             |              |                               |
| Systolic blood pressure                          | ✓            |               | ✓            | ✓                             |
| Other                                            |              | ✓             | ✓            |                               |
| Pain                                             |              |               | ✓            |                               |
| Staff concern                                    |              |               | ✓            | ✓                             |
| Skin colour                                      |              | ✓             |              |                               |
| Airway obstruction / abnormality                 |              |               | ✓            | ✓                             |
| Temperature                                      |              |               |              |                               |
| Pulses                                           |              |               |              |                               |
| Family concern                                   |              |               |              |                               |

**Table 2: Common physiological or behavioural components underpinning published PTTT**

### *Outcome measures*

Most studies evaluated the validity of the PTTT in terms of diagnostic statistics such as the Area under the Receiver Operating Characteristic (AUROC), sensitivity, specificity and positive predictive value (PPV).

The definition of case patients (case control studies, chart reviews) or primary outcome measure (cohort studies, observational studies) varied greatly between studies, with composite measures common. Cardiac/respiratory arrest or a “code call” was used as an outcome measure (or part of a composite outcome) in several studies, but most studies used proxy measures of deterioration such as transfer to a higher level of care (e.g., PICU or PHDU), RRT/MET call or senior review. Of note, the majority (20/35) of validation papers had ‘bench tested’ the PTTT – that is, the PTTT was not prospectively tested. In these studies, the performance of the PTTT was retrospectively evaluated by extracting

1  
2  
3 documented observations from medical records and charts and using these to generate a score  
4 to assess whether a triggering threshold would have been met.  
5

#### 6 *AUROC, Sensitivity, Specificity and PPV*

7  
8 With few exceptions<sup>36</sup>, almost all papers reported on the performance characteristics of the  
9 PTTT as a whole rather than reporting the contribution of individual components. Seventeen  
10 papers reported an AUROC, with scores ranging from 0.73-0.92, and 18 papers reported both  
11 the sensitivity and specificity of the PTTT and a further six studies reported sensitivity only.  
12  
13

14 Table 3 summarises the results of the PTTT validation studies, with full details in  
15 supplementary table 4. Three papers<sup>3,18,28</sup> reported outcomes for multiple PTTT in the same  
16 study, while one paper described three separate studies<sup>23</sup>.  
17  
18

19 <Table 3 here>  
20  
21

22 Overall, PTTT demonstrated either high sensitivity or high specificity, but not both. Studies  
23 reporting performance characteristics of a PTTT at a range of different scoring thresholds<sup>19,36</sup>  
24 demonstrate the expected interaction between sensitivity and specificity – at a lower  
25 threshold, sensitivity is high but specificity is low; at higher thresholds, the opposite is true.  
26 While very few authors articulated the reason for preferring a certain threshold, the vast  
27 majority of studies where sufficient data was reported chose thresholds at which specificity  
28 was higher than sensitivity. Exceptions to this pattern were largely found in studies using  
29 versions of the Brighton PEWS, where cut-off points of 2, 2.5 and 3 resulted in higher  
30 sensitivity than specificity in some studies<sup>16,19,21</sup>, and one instance of the Bristol PEWT<sup>28</sup>.  
31 Studies using similar PTTT and scoring thresholds produced notably different characteristics  
32 in different centres: Zhai and colleagues reported a specificity of 82% using a modified  
33 version of the Brighton PEWS with a triggering threshold of 2<sup>18</sup>; while Mandell and  
34 colleagues used the same version and of the tool with the same threshold, reporting a  
35 specificity of 58%<sup>21</sup>.  
36  
37

38 PPV values reported in the four cohort studies were consistently low: 5.9% for the Cardiff &  
39 Vale PEWS<sup>37</sup>, 3.6% for the Melbourne Activation Criteria<sup>36</sup>, 5.8% for the Brighton PEWS<sup>19</sup>  
40 and 2.6% for the NHS III PEWS<sup>38</sup>. While a small number of case-control studies did report  
41 higher PPV percentages<sup>16</sup>, they do not appear to have been adjusted to account for the  
42 underlying prevalence of adverse events among the inpatient population, and so are likely to  
43 be distorted.  
44  
45

#### 46 *Inter-rater reliability and missing data*

1  
2  
3 Some PTTT contain items whose scoring requires some subjective judgement, most notably  
4 the Brighton PEWS. However, only three papers reported on details of inter-rater reliability  
5 of scoring<sup>12,16,19</sup>, with mixed results: Tucker *et al.* reported that two nurses scored 55 patients  
6 on their modification of the Brighton PEWS<sup>19</sup>, achieving an intra-class coefficient of 0.92,  
7 but McLellan *et al.*, reported only 67% agreement in scoring on their C-CHEWS tool  
8 between a study nurse and the bedside nurse<sup>16</sup>. Missing or incomplete data was reported in  
9 just 11 papers. Fuijkschot *et al.*<sup>23</sup> reported that in 59% of cases reviewed “the PEWS was  
10 correctly performed and could be used for inclusion in the study”. Edwards *et al.*<sup>36</sup> did not  
11 implement their PTTT, but modified observation charts to include all eight items in the  
12 Cardiff & Vale PEWS. They reported an average completion rate of 44% for the different  
13 parameters. In the only multi-centre validation study identified, Parshuram *et al.*<sup>26</sup> reported  
14 that “of the 23,288 hours studied; only 5.1% had measurements on all 7 items, indicating that  
15 incomplete data were very common”.

## 26 27 **Question 2 – how effective are early warning systems?**

### 28 29 *Type of early warning system*

30  
31 The ‘early warning system’ interventions described in the 24 studies were typically multi-  
32 faceted. Overall, 22 of the studies included the introduction of a new PTTT, with one paper  
33 reporting an educational intervention only<sup>40</sup> and one paper reporting the introduction of a  
34 mandatory triggering system for a pre-existing PTTT and RRT<sup>41</sup>. A total of 14 of the 24  
35 studies involved the introduction of a new medical emergency team (MET) or RRT alongside  
36 the PTTT, with a further six studies where an RRT or MET was already in place. Only two  
37 studies evaluated the effectiveness of a PTTT in the absence of a dedicated response  
38 team<sup>42,43</sup>. A range of PTTT were used in Question 2 studies, with several using unpublished,  
39 in-house activation criteria<sup>44–50</sup>. The most commonly used PTTT were versions of the  
40 Brighton PEWS<sup>41,51–54</sup>, the Bedside PEWS<sup>42,55,56</sup> and Melbourne Activation Criteria<sup>57–60</sup>.

### 41 42 *Outcome measures*

43  
44 A variety of patient outcome measures were used to evaluate the effectiveness of early  
45 warning systems. Mortality, arrests and emergency “code calls” were the most common  
46 primary outcome measures, whereas in some cases the primary outcome measure was the  
47  
48  
49  
50  
51  
52  
53  
54  
55  
56  
57  
58  
59  
60

1  
2  
3 number of RRT/MET calls, with the stated aim of trying to increase utilisation of these  
4 dedicated teams<sup>40,41,44,54</sup>.

### 6 *Mortality and morbidity*

7  
8 Table 4 summarises the key findings from the 24 papers identified for Question 2, while  
9 supplementary table 5 gives full details of the studies included.

10  
11 <Table 4 here>

12  
13  
14 Overall, three papers reported a significant decrease in mortality following implementation of  
15 an early warning system<sup>48,58,60</sup>, each of which involved the use of a single-item trigger PTTT  
16 (Melbourne Activation Criteria or in-house, unpublished calling criteria) and an RRT or  
17 MET. One of these papers did not report any denominator data<sup>48</sup>, so their reported reduction  
18 was in overall numbers rather than a rate, meaning the changes may have reflected  
19 underlying admission numbers. The other two papers reported reductions in all-hospital  
20 mortality per 100 discharges<sup>58</sup> or per 1,000 admissions<sup>60</sup>. The same three papers also reported  
21 significant reductions in either cardiac arrests<sup>48</sup> (although again based solely on overall  
22 numbers), code calls which lead to critical interventions<sup>58</sup> and 'preventable' cardiac arrest<sup>60</sup>.

23  
24 Three further papers reported significant reductions in arrests<sup>46</sup> (no denominator used),  
25 respiratory arrests only<sup>47</sup> (per 1,000 patient-days), and code calls but not actual arrests<sup>57</sup> (per  
26 1,000 admissions). Again, each of these centres implemented a single-item trigger  
27 (Melbourne Activation Criteria or in-house, unpublished activation criteria) and an RRT or  
28 MET alongside the PTTT.

29  
30 Four other studies reported significant findings. In one of the few studies conducted in a non-  
31 specialist centres, Parshuram *et al.* used the Bedside PEWS (without a dedicated response  
32 team) and reported a significant increase in the rate (per 1,000 patient-days) of children  
33 requiring transfer to an external paediatric intensive care unit (PICU), but with a significant  
34 decrease in the rate of children requiring a critical intervention at ward level prior to  
35 transfer<sup>42</sup>. Following the introduction of the Bedside PEWS alongside a MET, Bonafide *et*  
36 *al.* found a trend towards reductions in mortality and arrest rates, but neither was statistically  
37 significant<sup>56</sup>. They did, however, report a significant reduction in the number of children who  
38 required a 'critical intervention' within 12 hours of being admitted to PICU. Of note, this was  
39 the only study to use an Interrupted Time Series (ITS) design, in which the trend (or slope) in  
40 outcome measures is compared for a set period of time pre and post intervention. Sefton *et al.*  
41 implemented the Bristol PEWT (without a dedicated response team) and evaluated



1  
2  
3 characteristics of PICU admissions before and after the PTTT<sup>43</sup>. They found decreases in  
4 acuity of children at PICU admission, the percentage of children requiring invasive  
5 ventilation in PICU and the median length of stay on the intensive care unit. Finally, Douglas  
6 *et al.* implemented the Brighton PEWS alongside an existing RRT team, and reported a  
7 significant increase in the number of RRT calls per 1,000 patient-days but no associated  
8 reduction in mortality or morbidity<sup>54</sup>.  
9  
10  
11  
12  
13  
14  
15  
16  
17  
18  
19  
20  
21  
22  
23  
24  
25  
26  
27  
28  
29  
30  
31  
32  
33  
34  
35  
36  
37  
38  
39  
40  
41  
42  
43  
44  
45  
46  
47  
48  
49  
50  
51  
52  
53  
54  
55  
56  
57  
58  
59  
60

## DISCUSSION

This paper aimed to review the published PTTT and early warning system literature in order to assess the extent to which PTTT had been validated (Question 1) and the extent to which early warning systems had been shown to be effective at reducing mortality and morbidity (Question 2). We believe these specific questions have not been answered in previous reviews.

### **How well validated are existing tools?**

Although a number of studies report findings that suggest that PTTT have some clinical predictive utility, we would argue that there a number of common methodological issues among validation studies that require the results to be interpreted with caution.

Importantly, each of the studies was conducted in a clinical setting where paediatric in-patients are subject to various forms of routine clinical intervention throughout their admission. This complicates the relationship between reaching a certain PTTT threshold at ‘time A’ and the occurrence of an adverse event at ‘time B’ – in a hypothetical ‘perfect’ hospital, children who displayed certain vital sign abnormalities would receive immediate clinical intervention and there would be no statistical relationship between a high PTTT score and adverse outcomes. Moreover, because events such as mortality or arrests are extremely rare, the majority of outcome measures used in the validation studies are clinical interventions themselves (e.g., PICU transfer). This is not to say that assessing the performance characteristics of a PTTT in a clinical setting is impossible – there are numerous statistical modelling techniques which can account for co-occurrence of clinical interventions and the longitudinal nature of the predictors<sup>61,62</sup>. However, none of the studies included in the review adequately account for this limitation and so authors’ estimates of PTTT performance should be interpreted with some caution..

There are other methodological issues with the validation studies reviewed. Given that the majority of studies used a case-control design, PPV in particular will be influenced by which case and control patients reflect the broader in-patient population. The variety of different outcome measures and study populations, and the dominance of studies conducted in specialist centres also greatly limit the generalisability of the results from these validation studies. The tendency for centres to modify existing scores prevents broad validation of any one tool in a variety of settings and study populations.

1  
2  
3 Finally, the fact that most studies only ‘bench-tested’ the PTTT limits the understanding of  
4 the way in which a tool might interact with the wider clinical microsystem. As a result, a  
5 balanced understanding of the potential benefits and limitations for using a PTTT in clinical  
6 practice is currently lacking from the literature. For instance, studies reporting missing  
7 data/completeness rates and PPV values point to two potential barriers for implementing and  
8 sustaining a PTTT in practice. Each PTTT pre-supposes that several vital signs and  
9 observations are regularly completed in order to properly score patients. However, this  
10 appears to be uncommon, and evidence from the adult literature points to the potential for  
11 tools to inadvertently mask deterioration when core observations are missing<sup>63</sup>. Missing data  
12 can in itself be informative, however none of the papers studied in this review modelled for it.  
13 Some studies report PTTT triggering for almost 50% of children on their unit at some point  
14 during admission<sup>36</sup>, and low PPV values point to the potential risk of ‘alarm fatigue’ due to  
15 the vast majority of triggering episodes occurring for children who are not deteriorating  
16 (although, as mentioned above, these figures may be distorted due to routine intervention  
17 preventing deterioration in clinical practice). For some centres, these issues may be mitigated  
18 to some extent by dedicated response teams or other available resources, but other hospitals  
19 may not be able to sustain the increased workload of responding to PTTT triggers.

20  
21  
22  
23  
24  
25  
26  
27  
28  
29  
30  
31  
32  
33  
34  
35  
36  
37  
38  
39  
40  
41  
42  
43  
44  
45  
46  
47  
48  
49  
50  
51  
52  
53  
54  
55  
56  
57  
58  
59  
60  
There has, to date, been a particular focus on evaluating and comparing the statistical  
properties of PTTT, with less discussion of wider contextual factors and the complexity of  
embedding a PTTT in clinical practice. Given the methodological limitations discussed  
above, we would suggest that such an approach puts too much weight on poorly estimated  
statistical characteristics, and not enough on the various human and organisational impacts of  
using different PTTT in everyday practice.

### **How effective are existing tools?**

Several effectiveness papers reported significant reductions in mortality or morbidity  
outcomes following implementation of an early warning system inclusive of a PTTT.  
However, interpretation of these results requires caution, given that the studies almost  
exclusively employed a ‘before and after’ study design, where rates of mortality and  
morbidity are compared between one time period pre-implementation and a second time  
period post-implementation. Before and after designs have inherent limitations in terms of  
establishing causality, in that they do not exclude the possibility that mortality or morbidity  
rates would have decreased over time irrespective of the introduction of a PTTT<sup>65</sup>. Bonafide

1  
2  
3 and colleagues did notably evaluate the impact of their Bedside PEWS using a more  
4 sophisticated ‘interrupted time series’ approach, demonstrating a significant reduction in the  
5 proportion of children requiring critical intervention within 12 hours of being admitted to  
6 PICU after introduction of the PTTT<sup>56</sup>. This occurred alongside a parallel increase in overall  
7 PICU admissions, and so it is not clear whether the PTTT specifically improved identification  
8 of at-risk children, or rather encouraged a broadly more conservative approach to admitting  
9 children to the ICU.  
10  
11  
12  
13

14 The majority of studies reporting significant findings also implemented a dedicated response  
15 team (or already had one in place) in addition to staff training or education alongside the  
16 PTTT. It is therefore difficult to isolate the effect of a PTTT from other organisational or  
17 systemic factors that typically accompany its implication. While dedicated response teams are  
18 more common in the United States and Australia, most hospitals in other countries (including  
19 the UK) typically have response teams whose members have other clinical roles. Many of the  
20 calling criteria or PTTT reported in the effectiveness studies may therefore be unsuitable for  
21 wider adoption. A handful of papers reported results pointing to a broader pattern of  
22 increased PICU transfers but reductions in acuity or the necessity for critical interventions  
23 among those that were transferred<sup>34,56</sup>. In the absence of more information about how this  
24 trend impacts on workload and resources, it is again possible that some centres would be  
25 unable to sustain the level of transfers to a higher level of care that would result from  
26 implementing a PTTT and an associated escalation policy. As with validation studies, the  
27 generalisability of the results from the effectiveness studies is further limited by the  
28 heterogeneity of outcome measures used, and the specialist nature of almost all units  
29 reporting outcomes.  
30  
31  
32  
33  
34  
35  
36  
37  
38  
39  
40

41 In the effectiveness studies reviewed here, there was very little data presented on the wider  
42 impact of PTTT<sup>7</sup>: including fidelity or adherence, or staff and resource implications of using  
43 a tool. Evidence from the adult care literature points to instances of poor compliance among  
44 clinical staff when early warning tools are implemented in practice<sup>66,67</sup>, and highlights  
45 various sociocultural barriers to their adoption<sup>68</sup>. Future studies should give similar  
46 consideration to the wider impact of using a PTTT in paediatric units. The limited evidence  
47 of PTTT effectiveness identified in this review is consistent with similar conclusions drawn  
48 by recent systematic reviews of the area<sup>8,9</sup>.  
49  
50  
51  
52  
53

## 54 **Conclusion**

55  
56  
57  
58  
59  
60

1  
2  
3 The PTTT literature is currently characterised by an ‘absence of evidence’ rather than an  
4 ‘evidence of absence’. That is, PTTT may well have some clinical predictive utility for aiding  
5 with the detection and timely response to deteriorating patients, but the existing evidence  
6 base is too limited to form any clear judgements. Validation studies have focused heavily on  
7 the statistical properties of PTTT, with arguably too much confidence expressed in these  
8 findings given methodological limitations. In contrast, there is little understanding of how  
9 PTTT impact on, and interact with, the wider clinical microsystem in paediatric units and  
10 how they are received and used by the clinical staff whose decisions they are intended to aid.  
11 Almost all of the PTTT reported in the literature have been developed and tested in specialist  
12 centres, typically in units with access to dedicated response teams – this considerably limits  
13 the generalisability of the findings, and is noteworthy given that PTTT appear to be  
14 commonly adopted by non-specialist units with little modification. Combined with the  
15 current lack of evidence for PTTT improving patient outcomes, we would urge caution  
16 among policymakers in calling for their use to become mandatory across all units based on  
17 the current evidence base. More work is required to understand the wider impact of PTTT  
18 implementation in different clinical settings before it is possible to evaluate their overall  
19 contribution to the wider safety mechanisms and systems aimed at identifying and responding  
20 to deteriorating in paediatric patients.  
21  
22  
23  
24  
25  
26  
27  
28  
29  
30  
31  
32  
33  
34  
35  
36  
37  
38  
39  
40  
41  
42  
43  
44  
45  
46  
47  
48  
49  
50  
51  
52  
53  
54  
55  
56  
57  
58  
59  
60

## FOOTNOTES

### Contributors

RT: screening and review of papers, contribution to design of work, preparation of manuscript; CH: screening and review of papers, contribution to concept and design of work, review of manuscript; FL: contribution to design of work, screening and review of papers, review of manuscript; KH: contribution to concept and design of work, screening and review of papers, review of manuscript; CP, DR, BM, AO, DE, RS, GS, DL, LT, DA, AL, ETJ: contribution to concept and design of work, screening and review of papers, review of manuscript; MM: information specialist, review of manuscript.

### Acknowledgements

We would like to acknowledge the contribution of Dr James Bunn to the review.

### Competing interests

None declared.

### Funding

This study is funded by the National Institute for Health Research (NIHR) Health Services and Delivery Research (HS&DR) programme (12/178/17).

### Data sharing statement

No additional data are available.

1  
2  
3  
4  
5  
6  
7  
8  
9  
10  
11  
12  
13  
14  
15  
16  
17  
18  
19  
20  
21  
22  
23  
24  
25  
26  
27  
28  
29  
30  
31  
32  
33  
34  
35  
36  
37  
38  
39  
40  
41  
42  
43  
44  
45  
46  
47  
48  
49  
50  
51  
52  
53  
54  
55  
56  
57  
58  
59  
60

**FIGURE LEGENDS**

**Figure 1 – PRISMA flow diagram of study inclusion**

For peer review only

## REFERENCES

1. Pearson, G. a (Ed). *Why Children Die: A Pilot Study 2006; England (South West, North East and West Midlands), Wales and Northern Ireland.* (2008). doi:ISBN: 978-0-9558055-0-9
2. Joint Commission. 2009 National Patient Safety Goals, Requirements and Rationales. *Jt. Comm. Perspect. Patient Saf.* **8**, 8–12 (2009).
3. Tume, L. The deterioration of children in ward areas in a specialist children's hospital. *Nurs. Crit. Care* **12**, 12–19 (2007).
4. NICE. Acutely ill patients in hospital: Recognition of and response to acute illness in adults in hospital. *NICE Clin. Guidel.* *50* 1–107 (2007). doi:10.1136/bmj.39272.679688.47
5. Adams, S. T. & Leveson, S. H. Clinical prediction rules. *BMJ* **344**, d8312 (2012).
6. Roland, D., Oliver, A., Edwards, E. D., Mason, B. W. & Powell, C. V. E. Use of paediatric early warning systems in Great Britain: has there been a change of practice in the last 7 years? *Arch. Dis. Child.* **99**, 26–9 (2014).
7. Toll, D. B., Janssen, K. J. M., Vergouwe, Y. & Moons, K. G. M. Validation, updating and impact of clinical prediction rules: A review. *Journal of Clinical Epidemiology* **61**, 1085–1094 (2008).
8. Chapman, S. M., Wray, J., Oulton, K. & Peters, M. J. Systematic review of paediatric track and trigger systems for hospitalised children. *Resuscitation* **109**, 87–109 (2016).
9. Lambert, V., Matthews, A., MacDonell, R. & Fitzsimons, J. Paediatric early warning systems for detecting and responding to clinical deterioration in children: a systematic review. *BMJ Open* **7**, e014497 (2017).
10. Moher, D., Liberati, A., Tetzlaff, J. & Altman, D. G. Preferred reporting items for systematic reviews and meta-analyses: the PRISMA statement. *BMJ* **339**, (2009).
11. Downs, S. H. & Black, N. The feasibility of creating a checklist for the assessment of the methodological quality both of randomised and non-randomised studies of health care interventions. *J. Epidemiol. Community Health* **52**, 377–384 (1998).
12. Bell, D. *et al.* The texas children's hospital pediatric advanced warning score as a predictor of clinical deterioration in hospitalized infants and children: A modification of the pews tool. *J. Pediatr. Nurs.* **28**, (2013).
13. Garlick, J. *et al.* Modified pediatric early warning scores, a predictor of appropriate transfer to higher level of care. *Crit. Care Med.* **41**, A166–A167 (2013).
14. Akre, M. *et al.* Sensitivity of the pediatric early warning score to identify patient deterioration. *Pediatrics* **125**, e763–9 (2010).



15. McLellan, M. C. & Connor, J. A. The Cardiac Children's Hospital Early Warning Score (C-CHEWS). *J. Pediatr. Nurs.* **28**, 171–178 (2013).
16. McLellan, M. C., Gauvreau, K. & Connor, J. A. Validation of the cardiac children's hospital early warning score: An early warning scoring tool to prevent cardiopulmonary arrests in children with heart disease. *Congenit. Heart Dis.* **9**, 194–202 (2014).
17. Skaletzky, S. M., Raszynski, A. & Totapally, B. R. Validation of a modified pediatric early warning system score: a retrospective case-control study. *Clin. Pediatr. (Phila)*. **51**, 431–5 (2012).
18. Zhai, H. *et al.* Developing and evaluating a machine learning based algorithm to predict the need of pediatric intensive care unit transfer for newly hospitalized children. *Resuscitation* **85**, 1065–1071 (2014).
19. Tucker, K. M., Brewer, T. L., Baker, R. B., Demeritt, B. & Vossmeier, M. T. Prospective evaluation of a pediatric inpatient early warning scoring system. *J. Spec. Pediatr. Nurs.* **14**, 79–85 (2009).
20. Fenix, J. B., Gillespie, C. W., Levin, A. & Dean, N. Comparison of Pediatric Early Warning Score to Physician Opinion for Deteriorating Patients. *Hosp. Pediatr.* **5**, 474–479 (2015).
21. Mandell, I. M. *et al.* Pediatric Early Warning Score and unplanned readmission to the pediatric intensive care unit. *J. Crit. Care* **30**, 1090–1095 (2015).
22. Duncan, H., Hutchison, J. & Parshuram, C. S. The pediatric early warning system score: A severity of illness score to predict urgent medical need in hospitalized children. *J. Crit. Care* **21**, 271–278 (2006).
23. Fuijkschot, J., Vernhout, B., Lemson, J., Draaisma, J. M. T. & Loeffen, J. L. C. M. Validation of a paediatric early warning score: First results and implications of usage. *Eur. J. Pediatr.* **174**, 15–21 (2015).
24. Hopkins, M., Rowan, C., Rigby, M. & Tori, A. PEWS score predicts the need for PICU transfer and critical care interventions. *Crit. Care Med. Conference*, 43rd Critical Care Congress of the Society of Crit (2013).
25. Gawronski, O. *et al.* Bedside pews in an Italian pediatric bone marrow transplant unit: Preliminary results of a longitudinal retrospective chart review. *Intensive Care Med.* **39**, S130 (2013).
26. Parshuram, C. S. *et al.* Multicentre validation of the bedside paediatric early warning system score: a severity of illness score to detect evolving critical illness in hospitalised children. *Crit Care* **15**, R184 (2011).
27. Parshuram, C. S., Hutchison, J. & Middaugh, K. Development and initial validation of the Bedside Paediatric Early Warning System score. *Crit. Care* **13**, R135–R135 (2009).

- 1  
2  
3 28. Robson, M.-A. J., Cooper, C. L., Medicus, L. a, Quintero, M. J. & Zuniga, S. a.  
4 Comparison of three acute care pediatric early warning scoring tools. *J. Pediatr. Nurs.*  
5 **28**, e33–41 (2013).  
6  
7 29. Ross, C. *et al.* Sensitivity and specificity of a pediatric early warning system using  
8 data-driven vital signs. *Crit. Care Med.* **43**, 39 (2015).  
9  
10 30. Gawronski, O. *et al.* Accuracy of Bedside Paediatric Early Warning System  
11 (BedsidePEWS) in a Pediatric Stem Cell Transplant Unit. *J. Pediatr. Oncol. Nurs.* **33**,  
12 249–256 (2016).  
13  
14 31. Clayson, R., Selby, A. & Tume, L. Is a paediatric early warning tool (PEWT) useful in  
15 cardiac patients? *Pediatr. Crit. Care Med.* **15**, 35–36 (2014).  
16  
17 32. Wright, D., Sefton, G. & Horan, M. Charted observations and the use of a paediatric  
18 early warning tool did not predict the majority of cardio-respiratory arrest calls in a  
19 paediatric hospital. *Arch. Dis. Child.* **96**, A59 (2011).  
20  
21 33. Haines, C., Perrott, M. & Weir, P. Promoting care for acutely ill children -  
22 Development and evaluation of a Paediatric Early Warning Tool. *Intensive Crit. Care*  
23 *Nurs.* **22**, 73–81 (2006).  
24  
25 34. Sefton, G., Lane, S. & Carrol, E. D. Performance of individual predictors of  
26 deterioration used in a paediatric early warning score. *Pediatr. Crit. Care Med.* **15**, 29–  
27 30 (2014).  
28  
29 35. O’Loughlin, K. *et al.* The effectiveness of the paediatric early warning tool (PEWT) in  
30 identifying children requiring admission to a critical care unit. *Arch. Dis. Child.* **97**,  
31 A154 (2012).  
32  
33 36. Edwards, E. D., Mason, B. W., Oliver, A. & Powell, C. V. E. Cohort study to test the  
34 predictability of the Melbourne criteria for activation of the medical emergency team.  
35 *Arch. Dis. Child.* **96**, 174–179 (2011).  
36  
37 37. Edwards, E. D., Powell, C. V., Mason, B. W. & Oliver, A. Prospective cohort study to  
38 test the predictability of the Cardiff and Vale paediatric early warning system. *Arch*  
39 *Dis Child* **94**, 602–606 (2009).  
40  
41 38. Mason, B. W., Edwards, E. D., Oliver, A. & Powell, C. V. E. Cohort study to test the  
42 predictability of the NHS Institute for Innovation and Improvement Paediatric Early  
43 Warning System. *Arch. Dis. Child.* archdischild–2015–308465 (2016).  
44 doi:10.1136/archdischild-2015-308465  
45  
46 39. Lin, J. *et al.* A simplified pediatric early warning system that relies solely on objective  
47 measures. *Crit. Care Med.* **43**, 192 (2015).  
48  
49 40. Ambati, S. R., Sweberg, T., Silver, P. & Gangadharan, S. Effect of simulation based  
50 curriculum on the utilization of rapid response team activations (RRT). *Crit. Care*  
51 *Med.* **42**, A1432 (2014).  
52  
53  
54  
55  
56  
57  
58  
59  
60

- 1  
2  
3 41. Panesar, R. *et al.* Characteristics and outcomes of pediatric rapid response teams  
4 before and after mandatory triggering by an elevated Pediatric Early Warning System  
5 (PEWS) score. *Hosp. Pediatr.* **4**, 135–140 (2014).  
6
- 7 42. Parshuram, C. S., Bayliss, A., Reimer, J., Middaugh, K. & Blanchard, N.  
8 Implementing the Bedside Paediatric Early Warning System in a community hospital:  
9 A prospective observational study. *Paediatr. Child Health* **16**, e18–22 (2011).  
10
- 11 43. Sefton, G. *et al.* What impact did a Paediatric Early Warning system have on  
12 emergency admissions to the paediatric intensive care unit? An observational cohort  
13 study. *Intensive Crit. care Nurs.* **31**, 91–99 (2015).  
14
- 15 44. Duns, N. *et al.* Introduction of a track and trigger system is associated with increased  
16 paediatric intensive care outreach utilisation and a trend towards improved patient  
17 outcomes in a tertiary children's hospital. *Aust. Crit. Care* **27**, 61 (2014).  
18
- 19 45. Hanson, C. C. *et al.* A reduction in cardiac arrests and duration of clinical instability  
20 after implementation of a paediatric rapid response system. *Postgrad. Med. J.* **86**, 314–  
21 318 (2010).  
22
- 23 46. Heyden, M. V, Mudge, B. & Casella, S. Initiation of a dedicated pediatric rapid  
24 response team reduces cardiopulmonary arrests outside of the intensive care unit in a  
25 small children's hospital. *Crit. Care Med.* **40**, 147 (2012).  
26
- 27 47. Hunt, E. A. *et al.* Transition from a traditional code team to a medical emergency team  
28 and categorization of cardiopulmonary arrests in a children's center. *Arch. Pediatr.*  
29 *Adolesc. Med.* **162**, 117–122 (2008).  
30
- 31 48. Mistry, K. P., Turi, J., Hueckel, R., Mericle, J. M. & Meliones, J. N. Pediatric Rapid  
32 Response Teams in the Academic Medical Center. *Clin. Pediatr. Emerg. Med.* **7**, 241–  
33 247 (2006).  
34
- 35 49. Anwar-Ul-Haque, Saleem, A. F., Zaidi, S. & Haider, S. R. Experience of pediatric  
36 rapid response team in a tertiary care hospital in Pakistan. *Indian J. Pediatr.* **77**, 273–  
37 276 (2010).  
38
- 39 50. Zenker, P. *et al.* Implementation and impact of a rapid response team in a children's  
40 hospital. *Jt. Comm. J. Qual. Patient Saf.* **33**, 418–425 (2007).  
41
- 42 51. Camacho, E. A., Holman, D., Badgett, V., St. Peters, J. & Southworth, B. Modification  
43 of a Pediatric Early Warning Tool for Use With Patients in a Specialized  
44 Cardiac/Renal Unit. *J. Pediatr. Nurs.* **26**, e2–e3 (2011).  
45
- 46 52. Demmel, K. M., Williams, L. & Flesch, L. Implementation of the pediatric early  
47 warning scoring system on a pediatric hematology/oncology unit. *J. Pediatr. Oncol.*  
48 *Nurs.* **27**, 229–240 (2010).  
49
- 50 53. Randhawa, S., Roberts-Turner, R., Woronick, K. & DuVal, J. Implementing and  
51 Sustaining Evidence-Based Nursing Practice to Reduce Pediatric Cardiopulmonary  
52 Arrest. *West. J. Nurs. Res.* **33**, 443–456 (2010).  
53

- 1  
2  
3 54. Douglas, K., Collado, J. C. & Keller, S. Implementation of a Pediatric Early Warning  
4 Scoring System at an Academic Medical Center. *Crit. Care Nurs. Q.* **39**, 363–370  
5 (2016).  
6
- 7 55. Ocholi, T., Downing, E., Rzeskiewicz, A., Pang, R. & Broughton, S. Impact of the  
8 Bedside PEWS on early detection of deteriorating patients. *Arch. Dis. Child.* **99**, A89–  
9 A90 (2014).  
10
- 11 56. Bonafide, C. P. *et al.* Impact of Rapid Response System Implementation on Critical  
12 Deterioration Events in Children. *JAMA Pediatr.* **168**, 25 (2014).  
13
- 14 57. Kotsakis, A. *et al.* Implementation of a multicenter rapid response system in pediatric  
15 academic hospitals is effective. *Pediatrics* **128**, 72–78 (2011).  
16
- 17 58. Sharek, P. J. *et al.* Effect of a rapid response team on hospital-wide mortality and code  
18 rates outside the ICU in a Children’s Hospital. *JAMA* **298**, 2267–2274 (2007).  
19  
20
- 21 59. Tibballs, J., Kinney, S., Duke, T., Oakley, E. & Hennessy, M. Reduction of paediatric  
22 in-patient cardiac arrest and death with a medical emergency team: preliminary results.  
23 *Arch. Dis. Child.* **90**, 1148–1152 (2005).  
24
- 25 60. Tibballs, J. & Kinney, S. Reduction of hospital mortality and of preventable cardiac  
26 arrest and death on introduction of a pediatric medical emergency team. *Pediatr. Crit.*  
27 *Care Med.* **10**, 306–312 (2009).  
28
- 29 61. Guerra, M. W., Shults, J., Amsterdam, J. & Ten-Have, T. The analysis of binary  
30 longitudinal data with time-dependent covariates. *Stat. Med.* **31**, 931–948 (2012).  
31  
32
- 33 62. Selig, J. P., Preacher, K. J. & Little, T. D. Modeling Time-Dependent Association in  
34 Longitudinal Data: A Lag as Moderator Approach. *Multivariate Behav. Res.* **47**, 697–  
35 716 (2012).  
36
- 37 63. Clifton, D. A. *et al.* ‘Errors’ and omissions in paper-based early warning scores: the  
38 association with changes in vital signs—a database analysis. *BMJ Open* **5**, e007376  
39 (2015).  
40
- 41 64. Chapman, S. M. *et al.* ‘The Score Matters’: wide variations in predictive performance  
42 of 18 paediatric track and trigger systems. *Arch. Dis. Child.* archdischild–2016–  
43 311088 (2017). doi:10.1136/archdischild-2016-311088  
44  
45
- 46 65. Joffe, A. R., Anton, N. R. & Burkholder, S. C. Reduction in hospital mortality over  
47 time in a hospital without a pediatric medical emergency team: limitations of before-  
48 and-after study designs. *Arch. Pediatr. Adolesc. Med.* **165**, 419–423 (2011).  
49
- 50 66. Niegsch, M., Fabritius, M. L. & Anh??j, J. Imperfect Implementation of an Early  
51 Warning Scoring System in a Danish Teaching Hospital: A Cross-Sectional Study.  
52 *PLoS One* **8**, (2013).  
53  
54
- 55 67. Hands, C. *et al.* Patterns in the recording of vital signs and early warning scores:  
56 Compliance with a clinical escalation protocol. *BMJ Qual. Saf.* **22**, 719–726 (2013).  
57  
58  
59

- 1  
2  
3 68. Lydon, S., Byrne, D., Offiah, G. & Gleeson, L. A mixed-methods investigation of  
4 health professionals' perceptions of a physiological track and trigger system. *BMJ*  
5 *Qual.* 688–695 (2015). doi:10.1136/bmjqs-2015-004261  
6  
7 69. Egdell, P., Finlay, L. & Pedley, D. K. The PAWS score: validation of an early warning  
8 scoring system for the initial assessment of children in the emergency department.  
9 *Emerg Med J* **25**, 745–749 (2008).  
10  
11 70. Rahman, Z. H. *et al.* Application of the burn center Pediatric Early Warning Score  
12 (PEWS) tool to clinical practice: A pilot validation study. *J. Burn Care Res.* **35**, S187  
13 (2014).  
14  
15 71. Ahmed, M. *et al.* Burton paediatric early warning system score. *Arch. Dis. Child.* **97**,  
16 A421 (2012).  
17  
18 72. Bonafide, C. P. *et al.* Development of a score to predict clinical deterioration in  
19 hospitalized children. *J. Hosp. Med.* **7**, 345–349 (2012).  
20  
21 73. Dean, N., Spaeder, M., Fenix, J. B. & Levin, A. Evaluation of a pediatric early  
22 warning score across different subspecialty patients. *Crit. Care Med.* **43**, 193 (2015).  
23  
24 74. Medar, S., Weingarten-Arams, J. & Katyal, C. Pediatric early warning score (PEWS)  
25 is a reliable predictor of rapid response team (RRT) call. *Crit. Care Med.* **43**, 228  
26 (2015).  
27  
28 75. Sandhu, S. *et al.* 726 The Paediatric Early Warning Tool in Combination with a Nurse-  
29 Led Outreach Team: Impact on Outcomes for Critically Ill Children. *Pediatr Res* **68**,  
30 368 (2010).  
31  
32 76. Norville, R., Wills-Bagnato, P., Staton, S. & Kennedy-Nasser, A. Improvement in  
33 early recognition of deteriorating pediatric bone marrow transplant patients. *Biol.*  
34 *Blood Marrow Transplant.* **19**, S173 (2013).  
35  
36  
37  
38  
39  
40  
41  
42  
43  
44  
45  
46  
47  
48  
49  
50  
51  
52  
53  
54  
55  
56  
57  
58  
59  
60

1  
2  
3  
4  
5  
6  
7  
8  
9  
10  
11  
12  
13  
14  
15  
16  
17  
18  
19  
20  
21  
22  
23  
24  
25  
26  
27  
28  
29  
30  
31  
32  
33  
34  
35  
36  
37  
38  
39  
40  
41  
42  
43  
44  
45  
46  
47  
48  
49  
50  
51  
52  
53  
54  
55  
56  
57  
58  
59  
60

For peer review only

Table 3 – Summary of PTTT validation study findings

| Reference                                                                                                                                                                                                            | Tool name                             | Used in practice? | Setting               | Study population          | Study design | Outcome measure                                          | Threshold tested | AURO C | Sensitivity | Specificity | PPV   |
|----------------------------------------------------------------------------------------------------------------------------------------------------------------------------------------------------------------------|---------------------------------------|-------------------|-----------------------|---------------------------|--------------|----------------------------------------------------------|------------------|--------|-------------|-------------|-------|
| <b>Paediatric Early Warning System score / Bedside PEWS (and variants of)</b>                                                                                                                                        |                                       |                   |                       |                           |              |                                                          |                  |        |             |             |       |
| Duncan, 2006 <sup>22</sup>                                                                                                                                                                                           | Paediatric Early Warning System score | No                | Specialist / tertiary | General in-patients       | Case-control | Arrest / code call                                       | 5                | 0.90   | 78.0        | 95.0        | 4.2*  |
| Robson, 2013 <sup>28</sup>                                                                                                                                                                                           | Paediatric Early Warning System score | No                | Specialist / tertiary | General in-patients       | Case-control | Arrest / code call                                       | 5                | 0.85   | 86.6        | 72.2        |       |
| Parshuram, 2009 <sup>27</sup>                                                                                                                                                                                        | Bedside PEWS                          | No                | Specialist / tertiary | General in-patients       | Case-control | PICU / PHDU transfer                                     | 8                | 0.91   | 82.0        | 93.0        |       |
| Parshuram, 2011 <sup>26</sup>                                                                                                                                                                                        | Bedside PEWS                          | No                | Specialist / tertiary | General in-patients       | Case-control | Arrest / code call; PICU / PHDU transfer                 | 7                | 0.87   | 64.0        | 91.0        |       |
| Robson, 2013 <sup>28</sup>                                                                                                                                                                                           | Bedside PEWS                          | No                | Specialist / tertiary | General in-patients       | Case-control | Arrest / code call                                       | 7                | 0.73   | 56.3        | 78.1        |       |
| Zhai, 2014 <sup>18</sup>                                                                                                                                                                                             | Bedside PEWS                          | No                | Specialist / tertiary | General in-patients       | Case-control | PICU / PHDU transfer                                     | 7                | 0.82   | 73.6        | 71.7        | 2.1*  |
| <b>Brighton PEWS (and variants of)</b>                                                                                                                                                                               |                                       |                   |                       |                           |              |                                                          |                  |        |             |             |       |
| Tucker, 2009 <sup>19</sup>                                                                                                                                                                                           | Modified PEWS                         | Yes               | Specialist / tertiary | General in-patients       | Cohort       | PICU / PHDU transfer                                     | 3                | 0.89   | 90.2        | 74.4        | 5.8   |
| Skaletzky, 2012 <sup>17</sup>                                                                                                                                                                                        | Modified PEWS                         | No                | Specialist / tertiary | General in-patients       | Case-control | Arrest / code call; PICU / PHDU transfer; RRT / MET call | 2.5              | 0.81   | 62.0        | 89.0        |       |
| McLellan, 2014 <sup>16</sup>                                                                                                                                                                                         | Cardiac CHEWS                         | No                | Specialist / tertiary | Specialist ward (cardiac) | Case-control | Arrest / code call; PICU / PHDU transfer                 | 3                | 0.86   | 95.3        | 76.2        | 50.8* |
| Mandell, 2015 <sup>21</sup>                                                                                                                                                                                          | Modified PEWS                         | Yes               | Specialist / tertiary | PICU discharges to ward   | Case-control | Re-admission to PICU                                     | 2                | 0.77   | 71.0        | 58.0        |       |
| <b>Bristol PEWT (and variants of)</b>                                                                                                                                                                                |                                       |                   |                       |                           |              |                                                          |                  |        |             |             |       |
| Robson, 2013 <sup>28</sup>                                                                                                                                                                                           | Paediatric Early Warning Tool         | No                | Specialist / tertiary | General in-patients       | Case-control | Arrest / code call                                       |                  | 0.75   | 76.3        | 61.5        |       |
| O'Loughlin, 2012 <sup>35</sup>                                                                                                                                                                                       | Paediatric Early Warning Tool         | Yes               | Specialist / tertiary | General in-patients       | Cohort       | PICU / PHDU transfer                                     |                  | 0.91   | 100.0       | 81.0        | 11.2* |
| <b>Melbourne Activation Criteria (and variants of)</b>                                                                                                                                                               |                                       |                   |                       |                           |              |                                                          |                  |        |             |             |       |
| Edwards, 2011 <sup>36</sup>                                                                                                                                                                                          | Melbourne Activation Criteria         | No                | Specialist / tertiary | General in-patients       | Cohort       | Mortality; arrest / code call; PICU / PHDU transfer      |                  | 0.79   | 68.3        | 83.2        | 3.6   |
| Edwards, 2009 <sup>37</sup>                                                                                                                                                                                          | Cardiff & Vale PEWS                   | No                | Specialist / tertiary | General in-patients       | Cohort       | Mortality; arrest / code call; PICU / PHDU transfer      | 2                | 0.86   | 69.5        | 89.9        | 5.9   |
| <b>Other</b>                                                                                                                                                                                                         |                                       |                   |                       |                           |              |                                                          |                  |        |             |             |       |
| Mason, 2016 <sup>38</sup>                                                                                                                                                                                            | NHS III score                         | No                | Specialist / tertiary | General in-patients       | Cohort       | Mortality; arrest / code call; PICU / PHDU transfer      | 2                | 0.83   | 73.2        | 75.2        | 2.6   |
| *Estimated PPV based on case/control ratio or imputed prevalence rate                                                                                                                                                |                                       |                   |                       |                           |              |                                                          |                  |        |             |             |       |
| Note: A number of papers included in the review did not include sufficient statistical detail (e.g., AUROC, sensitivity and specificity) to include in this summary table <sup>3,12-15,20,23-25,29-34,39,69-74</sup> |                                       |                   |                       |                           |              |                                                          |                  |        |             |             |       |



Table 4 – Summary of effectiveness study findings

| Reference                                                                     | PTTT name                       | RRT / MET in place? | Setting                    | Study population    | Study design            | Outcomes                              |                      |                                                     |                          |                                                               |                    |                                                             |
|-------------------------------------------------------------------------------|---------------------------------|---------------------|----------------------------|---------------------|-------------------------|---------------------------------------|----------------------|-----------------------------------------------------|--------------------------|---------------------------------------------------------------|--------------------|-------------------------------------------------------------|
|                                                                               |                                 |                     |                            |                     |                         | Mortality                             | Arrests / code calls | PICU / PHDU transfers                               | Acuity on PICU admission | Critical interventions                                        | RRT/MET calls      | Denominator                                                 |
| <b>Paediatric Early Warning System score / Bedside PEWS (and variants of)</b> |                                 |                     |                            |                     |                         |                                       |                      |                                                     |                          |                                                               |                    |                                                             |
| Parshuram, 2011                                                               | Bedside PEWS                    | No                  | Non-specialist / community | General in-patients | Before & after          |                                       |                      | ↑*<br>(transfers to external specialist centre)     |                          | ↓**<br>(critical intervention prior to transfer)              |                    | Per 1,000 patient-days                                      |
| Bonafide, 2014                                                                | Bedside PEWS                    | Yes                 | Specialist / tertiary      | General in-patients | Interrupted Time Series |                                       | ↓                    | ↑                                                   |                          | ↓**<br>(critical intervention within 12hrs of PICU admission) |                    | Per 1,000 patient-days                                      |
| <b>Brighton PEWS (and variants of)</b>                                        |                                 |                     |                            |                     |                         |                                       |                      |                                                     |                          |                                                               |                    |                                                             |
| Douglas, 2016                                                                 | Modified PEWS                   | Yes                 | Specialist / tertiary      | General in-patients | Before & after          |                                       | ↓                    |                                                     |                          |                                                               | ↑**<br>(RRT calls) | Per 1,000 patient days                                      |
| <b>Bristol PEWT (and variants of)</b>                                         |                                 |                     |                            |                     |                         |                                       |                      |                                                     |                          |                                                               |                    |                                                             |
| Sefton, 2014                                                                  | Modified PEWT                   | No                  | Specialist / tertiary      | General in-patients | Before & after          |                                       |                      |                                                     | ↓**<br>(PIM2 median)     | ↓**<br>(critical intervention during PICU admission)          |                    | Percentage of all PICU admissions                           |
| <b>Melbourne Activation Criteria (and variants of)</b>                        |                                 |                     |                            |                     |                         |                                       |                      |                                                     |                          |                                                               |                    |                                                             |
| Sharek, 2007                                                                  | Melbourne Activation Criteria   | Yes                 | Specialist / tertiary      | General in-patients | Before & after          | ↓**<br>(hospital-wide mortality rate) |                      | ↓**<br>(code call requiring critical intervention ) |                          |                                                               |                    | Per 1,000 patient-days (codes); Per 100 discharges (deaths) |
| Tibbals, 2009                                                                 | Melbourne Activation Criteria   | Yes                 | Specialist / tertiary      | General in-patients | Before & after          |                                       |                      |                                                     |                          |                                                               |                    |                                                             |
| Kotsaki, 2011                                                                 | Melbourne Activation Criteria   | Yes                 | Specialist / tertiary      | General in-patients | Before & after          |                                       |                      |                                                     |                          |                                                               |                    |                                                             |
| <b>Other</b>                                                                  |                                 |                     |                            |                     |                         |                                       |                      |                                                     |                          |                                                               |                    |                                                             |
| Mistry, 2006                                                                  | Unpublished activation criteria | Yes                 | Specialist / tertiary      | General in-patients | Before & after          | ↓**<br>(non PICU inpatient)           |                      | ↓**<br>(cardiac arrests)                            |                          |                                                               |                    | None used                                                   |



1  
2  
3  
4  
5  
6  
7  
8  
9  
10  
11  
12  
13  
14  
15  
16  
17  
18  
19  
20  
21  
22  
23  
24  
25  
26  
27  
28  
29  
30  
31  
32  
33  
34  
35  
36  
37  
38  
39  
40  
41  
42  
43  
44  
45  
46  
47

|                                                                                                                                                                                                                                                              |                                 |     |                       |                     |                |         |                                  |  |  |  |   |                        |
|--------------------------------------------------------------------------------------------------------------------------------------------------------------------------------------------------------------------------------------------------------------|---------------------------------|-----|-----------------------|---------------------|----------------|---------|----------------------------------|--|--|--|---|------------------------|
|                                                                                                                                                                                                                                                              |                                 |     |                       |                     |                | deaths) |                                  |  |  |  |   |                        |
| Hunt, 2008                                                                                                                                                                                                                                                   | Unpublished activation criteria | Yes | Specialist / tertiary | General in-patients | Before & after |         | ↓*<br>(respiratory arrests only) |  |  |  |   | Per 1,000 patient-days |
| Heyden, 2012                                                                                                                                                                                                                                                 | Unpublished activation criteria | Yes | Specialist / tertiary | General in-patients | Before & after |         | ↓**<br>(arrests)                 |  |  |  | ↑ | None used              |
| <p>*p&lt;0.05, ** p&lt;0.01<br/>         Note: A number of papers included in the review did not report significant reductions in mortality or morbidity findings and so are not included in this summary table <sup>40,41,44,45,49-53,55,59,75,76</sup></p> |                                 |     |                       |                     |                |         |                                  |  |  |  |   |                        |

For peer review only

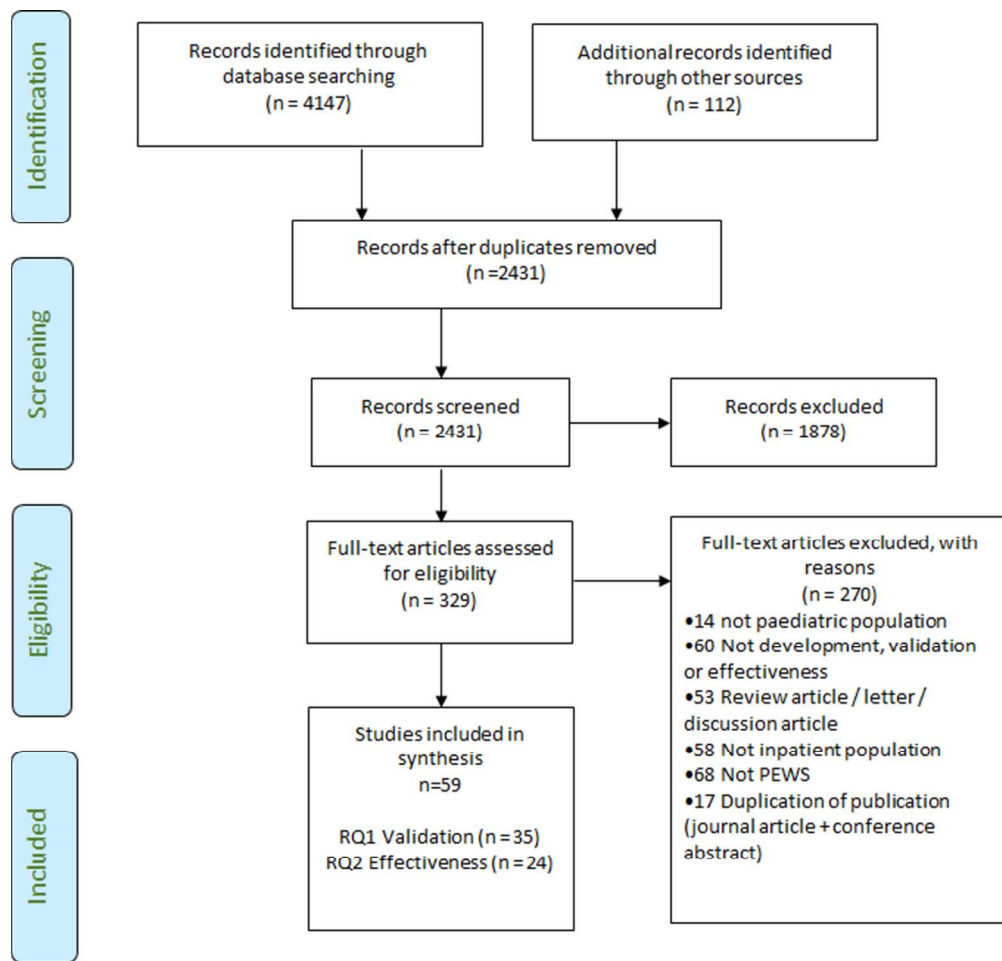

Figure 1: PRISMA flow diagram of study inclusion

99x95mm (300 x 300 DPI)

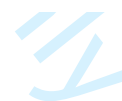

## PUMA - Paediatric early warning score Utilisation and Mortality Avoidance Search Methods

### Database Search

The search was across a range of databases from their inception to January 2015 then an update was carried out in September 2016

A preliminary search strategy was developed using a set of key papers known to the group for Ovid Medline using both text words and Medical subject headings. The search strategy was modified according to the indexing systems of the other databases.

| Databases and Database platform                                                                | Original search results<br>January 2015 | Update September 2016 |
|------------------------------------------------------------------------------------------------|-----------------------------------------|-----------------------|
| British Nursing Index (Proquest)                                                               | 19                                      | 12                    |
| CINAHL (Cumulative Index of<br>Nursing and Allied Health Literature)<br>(Ebsco)                | 206                                     | 17                    |
| Cochrane Central Register of<br>Controlled Trials (Wiley)                                      | 43                                      | 4                     |
| Database of Abstracts of Reviews of<br>Effectiveness (Centre for Reviews<br>and Dissemination) | 0                                       | 0                     |
| EMBASE (OVID)                                                                                  | 1065                                    | 206                   |
| HMIC (Health Management<br>Information Centre) (OVID)                                          | 70                                      | 1                     |
| Medline (OVID)                                                                                 | 943                                     | 135                   |
| Medline in Process (OVID)                                                                      | 43                                      | 69                    |
| Scopus (Elsevier)                                                                              | 747                                     | 85                    |
| Web of Knowledge (Science Science<br>Citation Indexes) (Thomson Reuter)                        | 400                                     | 82                    |
| <b>Total</b>                                                                                   | <b>3536</b>                             | <b>611</b>            |

**Total 4147**

### Supplementary search

| Trials Registers                                                                                                                    | Original search<br>results January<br>2015 | Update September<br>2016 |
|-------------------------------------------------------------------------------------------------------------------------------------|--------------------------------------------|--------------------------|
| ClinicalTrials.gov<br><a href="https://clinicaltrials.gov/">https://clinicaltrials.gov/</a>                                         | 6                                          | 4                        |
| UK Clinical Trials Gateway<br><a href="http://www.ukctg.nihr.ac.uk/default.aspx">http://www.ukctg.nihr.ac.uk/default.aspx</a>       | 3 (duplicates)                             | 5 (1 duplicate)          |
| The WHO trial search portal for studies worldwide:<br><a href="http://apps.who.int/trialsearch">http://apps.who.int/trialsearch</a> | 1 (duplicate)                              | 0                        |
| Journal site                                                                                                                        | Hits                                       |                          |

|                                                                                                                                                                                                                             |                  |                     |
|-----------------------------------------------------------------------------------------------------------------------------------------------------------------------------------------------------------------------------|------------------|---------------------|
| Archives of Disease in Childhood<br><a href="http://adc.bmj.com/">http://adc.bmj.com/</a>                                                                                                                                   | 14               | 4                   |
| BMJ<br><a href="http://www.bmj.com/theBMJ">http://www.bmj.com/theBMJ</a>                                                                                                                                                    | 1                | 0                   |
| BMJ Quality and safety<br><a href="http://qualitysafety.bmj.com/">http://qualitysafety.bmj.com/</a>                                                                                                                         | 7                | 4                   |
| JAMA Pediatrics<br><a href="http://archpedi.jamanetwork.com/journal.aspx">http://archpedi.jamanetwork.com/journal.aspx</a>                                                                                                  | 1                | 0                   |
| Journal of Critical Care<br><a href="http://www.jccjournal.org/">http://www.jccjournal.org/</a>                                                                                                                             | 3                | 1                   |
| Journal of Pediatrics ( American)<br><a href="http://www.jpeds.com/">http://www.jpeds.com/</a>                                                                                                                              | 1                | 0                   |
| Journal of Paediatrics and Child Health (Australian)<br><a href="http://onlinelibrary.wiley.com/journal/10.1111/(ISSN)1440-1754">http://onlinelibrary.wiley.com/journal/10.1111/(ISSN)1440-1754</a>                         | 2                | 2                   |
| Lancet<br><a href="http://www.thelancet.com/">http://www.thelancet.com/</a>                                                                                                                                                 | 0                | 0                   |
| New England Journal of Medicine<br><a href="http://www.nejm.org/">http://www.nejm.org/</a>                                                                                                                                  | 0                | 0                   |
| Pediatrics<br><a href="http://pediatrics.aappublications.org/">http://pediatrics.aappublications.org/</a>                                                                                                                   | 6                | 2                   |
| Pediatric Critical Care Medicine<br><a href="http://journals.lww.com/pccmjournals/pages/default.aspx">http://journals.lww.com/pccmjournals/pages/default.aspx</a>                                                           | 14               | 6                   |
| <b>Websites and organisations</b>                                                                                                                                                                                           | <b>HITS</b>      |                     |
| American Society of Anesthesiologists<br><a href="https://www.asahq.org/">https://www.asahq.org/</a>                                                                                                                        | 1                | 0                   |
| American Academy of Pediatrics<br><a href="http://www.aap.org/en-us/Pages/Default.aspx">http://www.aap.org/en-us/Pages/Default.aspx</a>                                                                                     | 1                |                     |
| Association of Anaesthetists of Great Britain and Ireland<br><a href="http://www.aagbi.org/">http://www.aagbi.org/</a>                                                                                                      | 0                | 0                   |
| Australian Medical Council<br><a href="http://www.amc.org.au/">http://www.amc.org.au/</a>                                                                                                                                   | 1                | 0                   |
| Royal College of Paediatrics and Child Health<br><a href="http://www.rcpch.ac.uk/">http://www.rcpch.ac.uk/</a>                                                                                                              | 1                | 0                   |
| Paediatric Nursing Association Europe<br><a href="http://www.rcn.org.uk/">http://www.rcn.org.uk/</a>                                                                                                                        | 9                |                     |
| European Federation of Critical Care Nursing Associations<br><a href="http://www.efccna.org/">http://www.efccna.org/</a>                                                                                                    | No Search Option | No Search Option    |
| Royal Australasian College of Physicians ( Division of Child Health)<br><a href="https://www.racp.edu.au/page/paed-policy">https://www.racp.edu.au/page/paed-policy</a>                                                     | 0                | 0                   |
| Royal College of Physicians (inclusive of National Clinical Guideline Centre)<br><a href="https://www.rcplondon.ac.uk/">https://www.rcplondon.ac.uk/</a>                                                                    | 2                | 0                   |
| The NHS Institute for Innovation and Improvement<br><a href="http://www.institute.nhs.uk/">http://www.institute.nhs.uk/</a>                                                                                                 | 4                | Site cease to exist |
| NICE: Eyes on Evidence<br><a href="https://www.evidence.nhs.uk/about-evidence-services/bulletins-and-alerts/eyes-on-evidence">https://www.evidence.nhs.uk/about-evidence-services/bulletins-and-alerts/eyes-on-evidence</a> | 4                | 1                   |
| <b>TOTAL</b>                                                                                                                                                                                                                | <b>82</b>        | <b>30</b>           |

**Total = 112**

## Search Strategies

### BNI

"Paediatric Early Warning" OR ("pediatric early warning" OR "pediatric rapid response") OR ("paediatric rapid response" OR "Bedside paediatric early warning") OR ("Pediatric Advanced Warning Score" OR "Paediatric Advanced Warning Score")

### CENTRAL

Search Name: PUMA search 15 jan 2015

Last Saved: 15/01/2015 16:12:08.536

Description:

| ID  | Search                                                                                              |
|-----|-----------------------------------------------------------------------------------------------------|
| #1  | "early warning score*"                                                                              |
| #2  | "early warning system*"                                                                             |
| #3  | "early warning tool*"                                                                               |
| #4  | "VitalPAC Early Warning Score"                                                                      |
| #5  | "activation criteria"                                                                               |
| #6  | "Rapid Response Team"                                                                               |
| #7  | "Track and trigger"                                                                                 |
| #8  | "trigger tools"                                                                                     |
| #9  | "calling criteria"                                                                                  |
| #10 | "Alert criteria"                                                                                    |
| #11 | "Rapid Response"                                                                                    |
| #12 | #1 or #2 or #3 or #4 or #5 or #6 or #7 or #8 or #9 or #10 or #11                                    |
| #13 | pediatric* or paediatric* or infant* or child* or baby or toddler or babies or teen* or adolescent* |
| #14 | #12 and #13                                                                                         |
| #15 | "Pediatric Early Warning"                                                                           |
| #16 | "Paediatric Early Warning"                                                                          |
| #17 | "paediatric alert"                                                                                  |
| #18 | "pediatric alert"                                                                                   |
| #19 | "Pediatric Rapid Response"                                                                          |
| #20 | "Paediatric Rapid Response"                                                                         |
| #21 | "Pediatric Advanced Warning Score*"                                                                 |
| #22 | "Paediatric Advanced Warning Score*"                                                                |
| #23 | "infant early warning"                                                                              |
| #24 | "Bedside PEWS"                                                                                      |
| #25 | "Bedside paediatric early warning"                                                                  |
| #26 | #15 or #16 or #17 or #18 or #19 or #20 or #21 or #22 or #23 or #24 or #25                           |
| #27 | #14 or #26                                                                                          |

### CINAHL via EBSCO

#### Search

**ID# Search Terms**

S11 S7 OR S10

- 1  
2  
3  
4  S10 S1 AND S8  
5  S9 S2 AND S8  
6  S8 S3 AND S4  
7  
8  S7 S5 OR S6  
9  
10  S6 TX "infant early warning" OR TX "bedside PEWS" OR TX "Bedside paediatric early  
11 warning"  
12 TX "p?ediatric early warning system" OR TX "P?ediatric Early Warning" OR TX  
13  S5 "p?ediatric early warning score" OR TX "p?ediatric risk of mortality" OR TX "P?ediatric  
14 Rapid Response Team" OR TX "P?ediatric alert"  
15  
16  S4 AB pediatric\* or paediatric\* or infant\*1 or child\* or baby or toddler or babies or teen\*  
17 or adolescent\*  
18 TX "track-and-trigger" OR TX "VitalPAC Early Warning Score" OR TX "activation criteria".  
19  S3 OR TX "trigger tool\*" OR TX "Rapid Response" OR TX "activation criteria". OR TX "early  
20 warning" OR TX "Alert criteria" OR TX outreach N3 emergency  
21  
22  S2 Detecting W3 deterioration  
23  
24  S1 "early warning"

**DARE**

(Paediatric early warning) OR (pediatric early warning) OR (Paediatric Rapid Response) IN DARE  
( early warning) OR (track-and-trigger system) OR ( Rapid Response) IN DARE  
(emergency team) AND (early warning) IN DARE

**HMIC**

Database: HMIC Health Management Information Consortium  
Search Strategy:

- 1 ("early warning" adj5 scor\*).ab,ti. (23)  
2 ("early warning" adj5 system\* adj5 (deteriorat\* or mortality or death or outcome\* or harm\* or  
3 safety)).ab,ti. (6)  
3 "acute illness severity".mp. (3)  
4 "early medical intervention"/ and ((prevent\* or reduc\* or improv\*) adj5 (deteriorat\* or  
5 mortality or death or outcome\* or harm\* or safety)).ab,ti. (0)  
6 ("early medical intervention" adj5 (tool\* or scor\* or index\* or indicator\* or indice\* or  
7 assessment\* or guide\* or instrument\* or criteria or parameter\* or deteriorat\* or mortality or death  
8 or monitor\* or outcome\* or harm\* or safety)).ab,ti. (0)  
9 Health Status Indicators.mp. and ((tool\* or scor\* or index\* or indicator\* or indice\* or  
10 assessment\* or instrument\* or criteria or parameter\*) adj3 ((prevent\* or reduc\* or improv\*) adj3  
11 (deteriorat\* or mortality or death or outcome\* or harm\* or safety))).ab,ti. (0)  
12 exp "Severity of illness index"/ and ((tool\* or scor\* or index\* or indicator\* or indice\* or  
13 assessment\* or instrument\* or criteria or parameter\*) adj5 ((prevent\* or reduc\* or improv\*) adj5  
14 (deteriorat\* or mortality or death or outcome\* or harm\* or safety))).ab,ti. (0)  
15  
16 "activation criteria".ab,ti. (2)  
17 exp Rapid response teams/ (39)  
18 Clinical Alarms.mp. (0)  
19 (outreach adj3 emergency).tw. (2)  
20 VitalPAC Early Warning Score.tw. (0)  
21 medical emergency team.tw. (15)  
22 Rapid Response Systems.mp. (8)

- 15 Rapid Response Team.tw. (27)
- 16 ((Detecting or managing) adj3 deterioration).tw. (1)
- 17 track-and-trigger system.tw. (2)
- 18 (Track adj trigger).tw. (1)
- 19 (Track and trigger).tw. (8)
- 20 trigger tools.tw. (4)
- 21 Calling criteria.tw. (1)
- 22 Alert criteria.mp. (1)
- 23 Rapid response.tw. (111)
- 24 (score adj3 severity of illness).tw. (3)
- 25 or/1-24 (171)
- 26 (pediatric\* or paediatric\* or infant\*1 or child\* or baby or toddler or babies or teen\* or adolescent\*).mp. (40161)
- 27 25 and 26 (14)
- 28 p?ediatric alert.tw. (0)
- 29 p?ediatric early warning systems.mp. (1)
- 30 p?ediatric risk of mortality.tw. (4)
- 31 Pediatric Rapid Response Team.tw. (0)
- 32 Point-of-Care.mp. and ((paediatric or pediatric) adj3 (improve or identify or detect\* or outcome or early or critical or emergency)).tw. (0)
- 33 Pediatric Advanced Warning Score.tw. (0)
- 34 neonatal early warning.tw. (0)
- 35 infant early warning.tw. (0)
- 36 paediatric rapid response.tw. (1)
- 37 pediatric rapid response.tw. (0)
- 38 Bedside paediatric early warning.tw. (0)
- 39 Bedside PEWS.tw. (0)
- 40 p?ediatric early warning.mp. (2)
- 41 care.mp. and ((paediatric or pediatric) adj3 (improve or identify or detect\* or outcome or early or critical or emergency)).tw. [mp=title, other title, abstract, heading words] (57)
- 42 or/28-41 (59)
- 43 27 and 42 (3)
- 44 27 or 42 (70)

#### Embase

Database: EMBASE <1947-Present>

Search Strategy:

- 
- 1 ("early warning" adj5 scor\*).ab,ti. (568)
  - 2 ("early warning" adj5 system\* adj5 (deteriorat\* or mortality or death or outcome\* or harm\* or safety)).ab,ti. (51)
  - 3 "acute illness severity".mp. (38)
  - 4 early intervention/ and ((prevent\* or reduc\* or improv\*) adj5 (deteriorat\* or mortality or death or outcome\* or harm\* or safety)).ab,ti. (1185)
  - 5 ("early medical intervention" adj5 (tool\* or scor\* or index\* or indicator\* or indice\* or assessment\* or guide\* or instrument\* or criteria or parameter\* or deteriorat\* or mortality or death or monitor\* or outcome\* or harm\* or safety)).ab,ti. (10)
  - 6 "severity of illness index"/ and ((tool\* or scor\* or index\* or indicator\* or indice\* or assessment\* or instrument\* or criteria or parameter\*) adj5 ((prevent\* or reduc\* or improv\*) adj5 (deteriorat\* or mortality or death or outcome\* or harm\* or safety))).ab,ti. (3)

7 exp Health Status Indicators/ and ((tool\* or scor\* or index\* or indicator\* or indice\* or  
 8 assessment\* or instrument\* or criteria or parameter\*) adj3 ((prevent\* or reduc\* or improv\*) adj3  
 9 (deteriorat\* or mortality or death or outcome\* or harm\* or safety))).ab,ti. (7)  
 10 rapid response team/ (849)  
 11 "alarm monitor"/ and (prevent\* or reduc\* or improv\*).mp. (245)  
 12 ("clinical alarm" adj5 (prevent\* or reduc\* or improv\*).mp. (2)  
 13 (outreach adj3 emergency).tw. (46)  
 14 VitalPAC Early Warning Score.tw. (15)  
 15 medical emergency team.tw. (395)  
 16 Rapid Response Systems.mp. (140)  
 17 ("rapid response" adj5 (prevent\* or reduc\* or improv\*).tw. (191)  
 18 ("medical device" adj3 (prevent\* or reduc\* or improv\*).mp. (187)  
 19 (((Detecting or managing) adj3 deterioration) and warning).tw. (11)  
 20 track-and-trigger system.tw. (24)  
 21 (Track adj trigger).tw. (4)  
 22 (Track and trigger).tw. (241)  
 23 trigger tools.tw. (47)  
 24 ("alert criteria" or "activation criteria" or "calling criteria").tw. (209)  
 25 SBAR technique\*.mp. (5)  
 26 (score adj3 severity of illness).tw. (393)  
 27 or/1-24 (4295)  
 28 limit 25 to (infant <to one year> or child <unspecified age> or preschool child <1 to 6 years> or  
 29 school child <7 to 12 years> or adolescent <13 to 17 years>) (533)  
 30 P?ediatric Early Warning.mp. (120)  
 31 p?ediatric alert.tw. (7)  
 32 p?ediatric early warning systems.mp. (4)  
 33 p?ediatric risk of mortality.tw. (527)  
 34 P?ediatric Rapid Response Team.tw. (14)  
 35 Point-of-Care Systems/ and ((paediatric or pediatric) adj3 (improve or identify or detect\* or  
 36 outcome or early or critical or emergency)).tw. (23)  
 37 P?ediatric Advanced Warning Score.tw. (3)  
 38 neonatal early warning.tw. (1)  
 39 infant early warning.tw. (0)  
 40 p?ediatric rapid response.tw. (31)  
 41 Bedside paediatric early warning.tw. (5)  
 42 Bedside PEWS.tw. (7)  
 43 or/27-38 (707)  
 44 26 or 39 (1155)  
 45 limit 40 to human (1065)

### Medline

Database: Ovid MEDLINE(R) <1946 to January Week 2 2015>

Search Strategy:

1 ("early warning" adj5 scor\*).ab,ti. (260)  
 2 ("early warning" adj5 system\* adj5 (deteriorat\* or mortality or death or outcome\* or harm\* or  
 3 safety)).ab,ti. (24)  
 4 "acute illness severity".mp. (21)  
 5 "early medical intervention"/ and ((prevent\* or reduc\* or improv\*) adj5 (deteriorat\* or  
 6 mortality or death or outcome\* or harm\* or safety)).ab,ti. (99)



1  
2  
3 5 ("early medical intervention" adj5 (tool\* or scor\* or index\* or indicator\* or indice\* or  
4 assessment\* or guide\* or instrument\* or criteria or parameter\* or deteriorat\* or mortality or death  
5 or monitor\* or outcome\* or harm\* or safety)).ab,ti. (7)  
6 exp Health Status Indicators/ and ((tool\* or scor\* or index\* or indicator\* or indice\* or  
7 assessment\* or instrument\* or criteria or parameter\*) adj3 ((prevent\* or reduc\* or improv\*) adj3  
8 (deteriorat\* or mortality or death or outcome\* or harm\* or safety))).ab,ti. (166)  
9 7 "Severity of Illness Index"/ and ((tool\* or scor\* or index\* or indicator\* or indice\* or assessment\*  
10 or instrument\* or criteria or parameter\*) adj5 ((prevent\* or reduc\* or improv\*) adj5 (deteriorat\* or  
11 mortality or death or outcome\* or harm\* or safety))).ab,ti. (274)  
12 8 exp Hospitals/ and ((Detecting or managing) adj3 deterioration).tw. (2)  
13 9 ("medical device" adj3 (prevent\* or reduc\* or improv\*)).mp. (58)  
14 10 ("alert criteria" or "activation criteria" or "calling criteria").tw. (121)  
15 11 Hospital Rapid Response Team/ (334)  
16 12 Clinical Alarms/ (332)  
17 13 (outreach adj3 emergency).tw. (32)  
18 14 VitalPAC Early Warning Score.tw. (10)  
19 15 medical emergency team.tw. (247)  
20 16 Rapid Response Systems.mp. (87)  
21 17 Rapid Response Team.tw. (185)  
22 18 (((Detecting or managing) adj3 deterioration) and warning).tw. (8)  
23 19 track-and-trigger system.tw. (14)  
24 20 (Track adj trigger).tw. (2)  
25 21 (Track and trigger).tw. (137)  
26 22 trigger tools.tw. (22)  
27 23 SBAR technique\*.mp. (3)  
28 24 ("rapid response" adj5 (prevent\* or reduc\* or improv\*)).tw. (117)  
29 25 (score adj3 severity of illness).tw. (243)  
30 26 or/1-25 (2286)  
31 27 limit 26 to (humans and "all child (0 to 18 years)") (453)  
32 28 P?ediatric Early Warning.mp. (38)  
33 29 p?ediatric alert.tw. (5)  
34 30 p?ediatric early warning systems.mp. (3)  
35 31 p?ediatric risk of mortality.tw. (400)  
36 32 P?ediatric Rapid Response Team.tw. (6)  
37 33 Point-of-Care Systems/ and ((paediatric or pediatric) adj3 (improve or identify or detect\* or  
38 outcome or early or critical or emergency)).tw. (79)  
39 34 P?ediatric Advanced Warning Score.tw. (2)  
40 35 neonatal early warning.tw. (0)  
41 36 infant early warning.tw. (0)  
42 37 p?ediatric rapid response.tw. (20)  
43 38 Bedside paediatric early warning.tw. (2)  
44 39 Bedside PEWS.tw. (2)  
45 40 or/28-39 (542)  
46 41 27 or 40 (943)

### Scopus

( TITLE-ABS-KEY ( "Paediatric Early Warning" OR "Pediatric Early Warning" OR "Pediatric Advanced  
Warning Score" OR "Paediatric Advanced Warning Score" OR "neonatal early warning" OR "infant  
early warning" OR "pediatric rapid response" OR "Paediatric rapid response" ) ) OR ( ( ( TITLE-ABS-  
KEY ( "early warning" W/5 scor\* ) ) OR ( TITLE-ABS-KEY ( "Rapid Response" ) ) OR ( TITLE-ABS-  
KEY ( "track-and-trigger system" ) ) OR ( TITLE-ABS-KEY ( "track and trigger" ) ) OR ( TITLE-ABS-

1  
2  
3 KEY ( "trigger tool\*" ) ) OR ( TITLE-ABS-KEY ( "alert criteria" ) ) OR ( TITLE-ABS-KEY ( "activation  
4 criteria" ) ) OR ( TITLE-ABS-KEY ( "VitalPAC Early Warning Score" ) ) ) AND ( TITLE-ABS-  
5 KEY ( pediatric\* OR paediatric\* OR infant\* OR child\* OR baby OR toddler OR babies OR teen\*  
6 OR adolescent\* ) ) AND ( LIMIT-TO ( SUBJAREA , "MEDI" ) OR LIMIT-  
7 TO ( SUBJAREA , "NURS" ) OR LIMIT-TO ( SUBJAREA , "NEUR" ) )  
8  
9

## 10 Web of Science

11  
12  
13  
14 # [400](#) #17 OR #1  
15 19 **Refined by:** [excluding] **WEB OF SCIENCE CATEGORIES:** (  
16 PARASITOLOGY OR PUBLIC ENVIRONMENTAL  
17 OCCUPATIONAL HEALTH OR BIOCHEMISTRY MOLECULAR  
18 BIOLOGY OR OPTICS OR HEALTH CARE SCIENCES SERVICES  
19 OR MYCOLOGY OR MANAGEMENT OR LINGUISTICS OR  
20 INSTRUMENTS INSTRUMENTATION OR MICROBIOLOGY OR  
21 INFORMATION SCIENCE LIBRARY SCIENCE OR  
22 MATHEMATICAL COMPUTATIONAL BIOLOGY OR GERIATRICS  
23 GERONTOLOGY OR ENGINEERING BIOMEDICAL OR FOOD  
24 SCIENCE TECHNOLOGY OR ENVIRONMENTAL STUDIES OR  
25 ENGINEERING ENVIRONMENTAL OR ENGINEERING  
26 ELECTRICAL ELECTRONIC OR HEALTH POLICY SERVICES OR  
27 TOXICOLOGY OR EDUCATION EDUCATIONAL RESEARCH OR  
28 NUTRITION DIETETICS OR SUBSTANCE ABUSE OR  
29 ECONOMICS OR MEDICINE RESEARCH EXPERIMENTAL OR  
30 STATISTICS PROBABILITY OR DEVELOPMENTAL BIOLOGY OR  
31 MEDICAL INFORMATICS OR SOCIOLOGY OR DENTISTRY ORAL  
32 SURGERY MEDICINE OR PSYCHOLOGY EXPERIMENTAL OR  
33 COMPUTER SCIENCE ARTIFICIAL INTELLIGENCE OR  
34 METEOROLOGY ATMOSPHERIC SCIENCES OR CHEMISTRY  
35 ANALYTICAL OR MEDICAL LABORATORY TECHNOLOGY OR  
36 CELL BIOLOGY OR DEMOGRAPHY OR BUSINESS FINANCE OR  
37 COMPUTER SCIENCE INTERDISCIPLINARY APPLICATIONS OR  
38 AUDIOLOGY SPEECH LANGUAGE PATHOLOGY OR  
39 PSYCHOLOGY DEVELOPMENTAL OR COMPUTER SCIENCE  
40 INFORMATION SYSTEMS OR PLANNING DEVELOPMENT )  
41 Indexes=SCI-EXPANDED, SSCI, CPCI-S, CPCI-SSH  
42 Timespan=1900-2015  
43  
44 # [499](#) #17 OR #1  
45 18 Indexes=SCI-EXPANDED, SSCI, CPCI-S, CPCI-SSH  
46 Timespan=1900-2015  
47  
48 # [487](#) #16 AND #15  
49 17 Indexes=SCI-EXPANDED, SSCI, CPCI-S, CPCI-SSH  
50 Timespan=1900-2015  
51  
52 # [8,044](#) #14 OR #13 OR #12 OR #11 OR #10 OR #9 OR #8 OR #7 OR  
53 16 #6 OR #5 OR #4 OR #3 OR #2  
54 Indexes=SCI-EXPANDED, SSCI, CPCI-S, CPCI-SSH  
55 Timespan=1900-2015  
56  
57 # [1,689,232](#) **TOPIC:** (( pediatric\* OR paediatric\* OR infant\* OR child\* OR  
58 15 baby OR toddler OR babies OR teen\* OR adolescent\*))

1  
2  
3  
4  
5  
6  
7  
8  
9  
10  
11  
12  
13  
14  
15  
16  
17  
18  
19  
20  
21  
22  
23  
24  
25  
26  
27  
28  
29  
30  
31  
32  
33  
34  
35  
36  
37  
38  
39  
40  
41  
42  
43  
44  
45  
46  
47  
48  
49  
50  
51  
52  
53  
54  
55  
56  
57  
58  
59  
60

Indexes=SCI-EXPANDED, SSCI, CPCI-S, CPCI-SSH

Timespan=1900-2015

# [130](#) **TOPIC:** ("Severity of Illness Index" and ((tool\* or scor\* or index\* or indicator\* or indice\* or assessment\* or instrument\* or criteria or parameter\*) SAME ((prevent\* or reduc\* or improv\*) SAME (deteriorat\* or mortality or death or outcome\* or harm\* or safety))))

Indexes=SCI-EXPANDED, SSCI, CPCI-S, CPCI-SSH

Timespan=1900-2015

# [63](#) **TOPIC:** ("early medical intervention" SAME (tool\* or scor\* or index\* or indicator\* or indice\* or assessment\* or guide\* or instrument\* or criteria or parameter\* or deteriorat\* or mortality or death or monitor\* or outcome\* or harm\* or safety)))

Indexes=SCI-EXPANDED, SSCI, CPCI-S, CPCI-SSH

Timespan=1900-2015

# [28](#) **TOPIC:** ("early medical intervention" and ((prevent\* or reduc\* or improv\*) SAME (deteriorat\* or mortality or death or outcome\* or harm\* or safety)))

Indexes=SCI-EXPANDED, SSCI, CPCI-S, CPCI-SSH

Timespan=1900-2015

# [1,206](#) **TOPIC:** ("early warning" SAME system\* SAME (deteriorat\* or mortality or death or outcome\* or harm\* or safety))

Indexes=SCI-EXPANDED, SSCI, CPCI-S, CPCI-SSH

Timespan=1900-2015

# [2](#) **TOPIC:** ("SBAR technique")

Indexes=SCI-EXPANDED, SSCI, CPCI-S, CPCI-SSH

Timespan=1900-2015

# [7](#) **TOPIC:** ("VitalPAC Early Warning Score")

Indexes=SCI-EXPANDED, SSCI, CPCI-S, CPCI-SSH

Timespan=1900-2015

# [123](#) **TOPIC:** ("activation criteria")

Indexes=SCI-EXPANDED, SSCI, CPCI-S, CPCI-SSH

Timespan=1900-2015

# [16](#) TS=("alert criteria")

Indexes=SCI-EXPANDED, SSCI, CPCI-S, CPCI-SSH

Timespan=1900-2015

# [159](#) TS=("trigger tool\*")

Indexes=SCI-EXPANDED, SSCI, CPCI-S, CPCI-SSH

Timespan=1900-2015

# [45](#) TS=("track and trigger")

Indexes=SCI-EXPANDED, SSCI, CPCI-S, CPCI-SSH

Timespan=1900-2015

# [15](#) TS=("track-and-trigger system")

Indexes=SCI-EXPANDED, SSCI, CPCI-S, CPCI-SSH

Timespan=1900-2015

# [6,100](#) TS=("Rapid Response")

Indexes=SCI-EXPANDED, SSCI, CPCI-S, CPCI-SSH

Timespan=1900-2015

# [604](#) TS=("early warning" SAME scor\*)

1  
2  
3  
4 2 Indexes=SCI-EXPANDED, SSCI, CPCI-S, CPCI-SSH  
5 Timespan=1900-2015  
6 # [88](#) TS=("Paediatric Early Warning" OR "Pediatric Early Warning"  
7 1 OR "Pediatric Advanced Warning Score" OR "Paediatric  
8 Advanced Warning Score" OR "neonatal early warning" OR  
9 "infant early warning" OR "pediatric rapid response" OR  
10 "Paediatric rapid response")  
11 Indexes=SCI-EXPANDED, SSCI, CPCI-S, CPCI-SSH  
12 Timespan=1900-2015  
13

14  
15 **PUMA Supplementary** searches

16  
17 **Search terms to use:**

18 "Pediatric Early warning"  
19 "Paediatric Early warning"  
20 "Pediatric Rapid Response Team"  
21 "Paediatric Rapid Response Team"  
22 PEWS  
23 "Paediatric trigger tools"  
24 "Pediatric trigger tools"  
25  
26  
27  
28  
29  
30  
31  
32  
33  
34  
35  
36  
37  
38  
39  
40  
41  
42  
43  
44  
45  
46  
47  
48  
49  
50  
51  
52  
53  
54  
55  
56  
57  
58  
59  
60

Supplementary table 2 - study characteristics of PTTS validation studies

| First author         | Year | Full text? | PTTS name                               | Based on                      | Modification from original version |               |                     |                               | Score / trigger | Study design                       | Bench tested / implemented? | Data collection (intervention period) | Primary outcome measure               | Country     | Single / multi centre | Setting                      | Study population                                   | Inclusion criteria (case / cohort)           | Inclusion criteria (control)                                          | Sample size (overall) | Sample size (cases / adverse events) |
|----------------------|------|------------|-----------------------------------------|-------------------------------|------------------------------------|---------------|---------------------|-------------------------------|-----------------|------------------------------------|-----------------------------|---------------------------------------|---------------------------------------|-------------|-----------------------|------------------------------|----------------------------------------------------|----------------------------------------------|-----------------------------------------------------------------------|-----------------------|--------------------------------------|
|                      |      |            |                                         |                               | Added items                        | Removed items | Modified thresholds | Modified escalation algorithm |                 |                                    |                             |                                       |                                       |             |                       |                              |                                                    |                                              |                                                                       |                       |                                      |
| Duncan               | 2006 | Y          | Paediatric Early Warning System score   |                               |                                    |               |                     |                               | Score           | Case-control                       | No                          | Retrospective                         | Arrest / code call                    | Canada      | Single                | Tertiary / specialist centre | All in-patients                                    | Code blue call                               | No code blue call or PICU admission within 48 hours of study duration | 215                   | 128                                  |
| Bell                 | 2013 | Y          | Texas Children's Hospital (TCH) PAWS    | Brighton PEWS                 | ✓                                  | ✓             | ✓                   | ✓                             | Score           |                                    |                             | Retrospective                         |                                       | US          | Single                | Tertiary / specialist centre | General medicine & two specialist wards            |                                              |                                                                       | 150                   |                                      |
| Edwards              | 2008 | Y          | Cardiff & Vale PEWS                     | Melbourne Activation Criteria |                                    |               |                     |                               | Score           | Cohort                             | No                          | Prospective                           | PICU / HDU transfer, arrest or death  | UK          | Single                | Tertiary / specialist centre | All in-patients                                    | Any in-patient admission                     |                                                                       | 1,000                 | 16                                   |
| Egdell               | 2008 | Y          | Paediatric Advance Warning Score (PAWS) |                               |                                    |               |                     |                               | Score           | Case-control                       | No                          | Retrospective                         | PICU admission                        | UK          | Single                | Tertiary / specialist centre | Emergency department only                          | PICU admission direct from ED                | Ward admission direct from ED                                         |                       |                                      |
| Fuijkschot (Study 1) | 2015 | Y          | Modified PEWS                           | Bedside PEWS                  | ✓                                  |               | ✓                   |                               | Score           | Case-cohort                        |                             | Retrospective                         |                                       | Netherlands | Single                | Tertiary / specialist centre | Specialist ward only (oncology)                    |                                              |                                                                       | 118                   | 15                                   |
| Fuijkschot (Study 2) | 2015 | Y          | Modified PEWS                           | Bedside PEWS                  | ✓                                  |               | ✓                   |                               | Score           | Case-cohort                        |                             | Retrospective                         |                                       | Netherlands | Single                | Tertiary / specialist centre | All in-patients                                    |                                              |                                                                       | Unclear               | 24                                   |
| Fuijkschot (Study 3) | 2015 | Y          | Modified PEWS                           | Bedside PEWS                  | ✓                                  |               | ✓                   |                               | Score           | Case-cohort                        |                             | Prospective                           |                                       | Netherlands | Single                | Tertiary / specialist centre | All in-patients                                    |                                              |                                                                       | Unclear               | 14                                   |
| Clayson              | 2014 | N          | Adjusted PEWT                           | Bristol PEWT                  |                                    |               | ✓                   |                               | Trigger         | Cohort                             | Unclear                     | Prospective                           | Unclear                               | UK          | Single                | Tertiary / specialist centre | Specialist ward only (cardiac)                     | Unclear                                      |                                                                       | 126                   |                                      |
| Rahman               | 2014 | N          | Burn-specific PEWS                      | Brighton PEWS                 | ✓                                  |               | ✓                   |                               | Score           | Case / chart review                | Unclear                     | Retrospective                         | Unclear                               | US          | Single                | Tertiary / specialist centre | Specialist ward only (burns unit)                  | Non-intubated, LOS > 3 days                  |                                                                       | 50                    |                                      |
| Wright               | 2011 | N          | Paediatric Early Warning Tool (PEWT)    | Bristol PEWT                  |                                    |               |                     |                               | Trigger         | Case / chart review                | Yes                         | Retrospective                         | Cardiac arrest                        | UK          | Single                | Tertiary / specialist centre | All in-patients                                    | All cardiac arrest calls                     |                                                                       | 55                    |                                      |
| Hopkins              | 2013 | N          | Modified PEWS                           | Bedside PEWS                  | 7-item version                     |               |                     |                               | Score           | Case-control                       | Unclear                     | Retrospective                         | PICU transfer following code/RRT call | US          | Single                | Tertiary / specialist centre | All in-patients                                    | Code/RRT calls requiring PICU transfer       | Code / RRT calls remaining on ward                                    | 66                    | 47                                   |
| Gawronski            | 2013 | N          | Bedside PEWS                            |                               | Unclear                            |               |                     |                               | Score           | Case-control                       | No                          | Retrospective                         | PICU transfer                         | Italy       | Single                | Tertiary / specialist centre | Specialist ward only (bone marrow transplant unit) | PICU transfer / review / death               | No transfer / review / death during stay                              | 11                    | 10                                   |
| Haines               | 2006 | Y          | Bristol PEWT                            |                               |                                    |               |                     |                               | Trigger         | Case-control (only cases analysed) | No                          | Prospective                           | PICU / HDU admission, arrest or death | UK          | Single                | Tertiary / specialist centre | All in-patients                                    | Patients who triggered PEWT during admission | Patients who did not trigger PEWT during admission                    | 360                   | 180                                  |
| Garlick              | 2013 | N          | Modified PEWS                           | Brighton PEWS                 | ✓                                  |               |                     |                               | Score           | Case / chart review                | Unclear                     | Retrospective                         | PICU transfer                         | US          | Single                | Tertiary / specialist centre | All in-patients                                    | Patients who had MET activation              |                                                                       | 267                   |                                      |
| Ahmed                | 2012 | N          | Burton PEWS                             | Unclear                       |                                    |               |                     |                               | Score           | Case / chart review                | No                          | Retrospective                         | PICU transfer                         | UK          | Single                | Unclear                      | Unclear                                            | All PICU transfers                           |                                                                       | 23                    | 23                                   |

|    |            |      |   |                                         |                                              |         |  |   |         |                     |         |               |                                                 |             |        |                              |                                    |                                                 |                                                        |                      |                    |
|----|------------|------|---|-----------------------------------------|----------------------------------------------|---------|--|---|---------|---------------------|---------|---------------|-------------------------------------------------|-------------|--------|------------------------------|------------------------------------|-------------------------------------------------|--------------------------------------------------------|----------------------|--------------------|
| 1  | Akre       | 2010 | Y | Paediatric Early Warning Score          | Brighton PEWS                                |         |  | ✓ | Score   | Case / chart review | No      | Retrospective | Code / RRT call                                 | US          | Single | Tertiary / specialist centre | All in-patients                    | Code or RRT call                                | 186                                                    | 186                  |                    |
| 2  |            |      |   |                                         |                                              |         |  |   |         |                     |         |               |                                                 |             |        |                              |                                    |                                                 |                                                        |                      |                    |
| 3  | Edwards    | 2011 | Y | Melbourne Activation Criteria           |                                              |         |  |   | Trigger | Cohort              | No      | Retrospective | PICU/HDU transfer, arrest, death                | UK          | Single | Tertiary / specialist centre | All in-patients                    | Any in-patient admission                        | 1,000                                                  | 16                   |                    |
| 4  |            |      |   |                                         |                                              |         |  |   |         |                     |         |               |                                                 |             |        |                              |                                    |                                                 |                                                        |                      |                    |
| 5  | McLellan   | 2013 | Y | Cardiac CHEWS                           | Brighton PEWS                                | ✓       |  | ✓ | Score   | Pilot study         | Yes     |               |                                                 | US          | Single | Tertiary / specialist centre | Specialist unit only (cardiac)     |                                                 |                                                        |                      |                    |
| 6  |            |      |   |                                         |                                              |         |  |   |         |                     |         |               |                                                 |             |        |                              |                                    |                                                 |                                                        |                      |                    |
| 7  | McLellan   | 2014 | Y | Cardiac CHEWS                           | Brighton PEWS                                | ✓       |  | ✓ | Score   | Case-control        | Yes     | Prospective   | PICU transfer / cardiac arrest                  | US          | Single | Tertiary / specialist centre | Specialist unit only (cardiac)     | PICU transfer / cardiac arrest                  | No transfer or arrest                                  | 312                  | 64                 |
| 8  |            |      |   |                                         |                                              |         |  |   |         |                     |         |               |                                                 |             |        |                              |                                    |                                                 |                                                        |                      |                    |
| 9  | Skaletzky  | 2012 | Y | Modified Paediatric Early Warning Score | Brighton PEWS                                |         |  | ✓ | Score   | Case-control        | No      | Retrospective | PICU transfer                                   | US          | Single | Tertiary / specialist centre | Medical-surgical ward only         | PICU transfer                                   | No transfer                                            | 350                  | 100                |
| 10 |            |      |   |                                         |                                              |         |  |   |         |                     |         |               |                                                 |             |        |                              |                                    |                                                 |                                                        |                      |                    |
| 11 | Zhai       | 2014 | Y | Automated algorithm                     |                                              |         |  |   | Score   | Case-control        | No      | Retrospective | PICU transfer                                   | US          | Single | Tertiary / specialist centre | All in-patients                    | PICU transfer within 24 hr of ward admission    | No PICU transfer                                       | 7,298 (measurements) | 526 (measurements) |
| 12 |            |      |   |                                         |                                              |         |  |   |         |                     |         |               |                                                 |             |        |                              |                                    |                                                 |                                                        |                      |                    |
| 13 | Zhai       | 2014 | Y | Brighton PEWS                           | Brighton PEWS                                |         |  |   | Score   | Case-control        | No      | Retrospective | PICU transfer                                   | US          | Single | Tertiary / specialist centre | All in-patients                    | PICU transfer within 24 hr of ward admission    | No PICU transfer                                       | 7,298 (measurements) | 526 (measurements) |
| 14 |            |      |   |                                         |                                              |         |  |   |         |                     |         |               |                                                 |             |        |                              |                                    |                                                 |                                                        |                      |                    |
| 15 | Zhai       | 2014 | Y | Bedside PEWS                            | Bedside PEWS                                 |         |  |   | Score   | Case-control        | No      | Retrospective | PICU transfer                                   | US          | Single | Tertiary / specialist centre | All in-patients                    | PICU transfer within 24 hr of ward admission    | No PICU transfer                                       | 7,298 (measurements) | 526 (measurements) |
| 16 |            |      |   |                                         |                                              |         |  |   |         |                     |         |               |                                                 |             |        |                              |                                    |                                                 |                                                        |                      |                    |
| 17 | Bonafide   | 2012 | Y | 7-item score (non-vital signs)          |                                              |         |  |   | Score   | Case-control        | No      | Retrospective | Arrest, resp compromise or urgent PICU transfer | US          | Single | Tertiary / specialist centre | All in-patients                    | Arrest, resp compromise or urgent PICU transfer | On in-patient ward at same time as matched case        | 564                  | 141                |
| 18 |            |      |   |                                         |                                              |         |  |   |         |                     |         |               |                                                 |             |        |                              |                                    |                                                 |                                                        |                      |                    |
| 19 | Sefton     | 2014 | N | Modified Bristol PEWT                   | Bristol PEWT                                 | Unclear |  |   | Score   | Chart review        | Unclear | Retrospective | Arrest, PICU transfer or unexpected death       | UK          | Single | Tertiary / specialist centre | Unclear                            |                                                 |                                                        | Unclear              | Unclear            |
| 20 |            |      |   |                                         |                                              |         |  |   |         |                     |         |               |                                                 |             |        |                              |                                    |                                                 |                                                        |                      |                    |
| 21 | Parshuram  | 2011 | Y | Bedside PEWS                            | Bedside PEWS                                 | 7-item  |  |   | Score   | Case-control        | No      | Prospective   |                                                 | UK / Canada | Multi  | Tertiary / specialist centre | All in-patients                    | Urgent PICU transfer or call to ressucc team    | No PICU transfer or ressucc call within 48 hours       | 2,074                | 686                |
| 22 |            |      |   |                                         |                                              |         |  |   |         |                     |         |               |                                                 |             |        |                              |                                    |                                                 |                                                        |                      |                    |
| 23 | Parshuram  | 2009 | Y | Bedside PEWS                            | Paediatric Early Warning System (PEWS) score |         |  | ✓ | Score   | Case-control        | No      | Retrospective | Urgent PICU transfer                            | Canada      | Single | Tertiary / specialist centre | All in-patients                    | Urgent PICU transfer (not from 'code blue')     | No 'code blue' or urgent PICU transfer within 48 hours | 180                  | 60                 |
| 24 |            |      |   |                                         |                                              |         |  |   |         |                     |         |               |                                                 |             |        |                              |                                    |                                                 |                                                        |                      |                    |
| 25 | Tucker     | 2009 | Y | Modified Paediatric Early Warning Score | Brighton PEWS                                |         |  | ✓ | Score   | Cohort              | Yes     | Prospective   | PICU transfer                                   | US          | Single | Tertiary / specialist centre | General medical unit only          | PICU transfer                                   |                                                        | 2,979                | 51                 |
| 26 |            |      |   |                                         |                                              |         |  |   |         |                     |         |               |                                                 |             |        |                              |                                    |                                                 |                                                        |                      |                    |
| 27 | Tume       | 2007 | Y | Bristol PEWT                            |                                              |         |  |   | Trigger | Chart review        | No      | Retrospective | Unplanned PICU / PHDU transfer                  | UK          | Single | Tertiary / specialist centre | Unplanned PICU/PHDU transfers only | Unplanned PICU / PHDU transfer                  |                                                        | 29                   | 29                 |
| 28 |            |      |   |                                         |                                              |         |  |   |         |                     |         |               |                                                 |             |        |                              |                                    |                                                 |                                                        |                      |                    |
| 29 | Tume       | 2007 | Y | Melbourne Activation Criteria           |                                              |         |  |   | Trigger | Chart review        | No      | Retrospective | Unplanned PICU / PHDU transfer                  | UK          |        | Tertiary / specialist centre | Unplanned PICU/PHDU transfers only | Unplanned PICU / PHDU transfer                  |                                                        | 29                   | 29                 |
| 30 |            |      |   |                                         |                                              |         |  |   |         |                     |         |               |                                                 |             |        |                              |                                    |                                                 |                                                        |                      |                    |
| 31 | O'Loughlin | 2012 | N | Paediatric Early Warning Tool           | Bristol PEWT                                 |         |  |   | Trigger | Cohort              | Yes     | Prospective   | PICU transfer                                   | UK          | Single | Tertiary / specialist centre | All in-patients                    | Any in-patient admission                        |                                                        | 331                  | 7                  |
| 32 |            |      |   |                                         |                                              |         |  |   |         |                     |         |               |                                                 |             |        |                              |                                    |                                                 |                                                        |                      |                    |

|    |           |      |   |                                         |               |   |   |   |  |         |                       |         |               |                                                  |         |        |                              |                                                                     |                                                                 |                                                                    |         |         |
|----|-----------|------|---|-----------------------------------------|---------------|---|---|---|--|---------|-----------------------|---------|---------------|--------------------------------------------------|---------|--------|------------------------------|---------------------------------------------------------------------|-----------------------------------------------------------------|--------------------------------------------------------------------|---------|---------|
| 1  | Robson    | 2013 | Y | Paediatric Early Warning Tool           | Bristol PEWT  |   |   |   |  | Trigger | Case-control          | No      | Retrospective | Code call / arrest                               | US      | Single | Tertiary / specialist centre | All in-patients                                                     | Code call / arrest                                              | No code call / arrest                                              | 192     | 96      |
| 2  |           |      |   |                                         |               |   |   |   |  |         |                       |         |               |                                                  |         |        |                              |                                                                     |                                                                 |                                                                    |         |         |
| 3  | Robson    | 2013 | Y | PEW System Score                        |               |   |   |   |  | Score   | Case-control          | No      | Retrospective | Code call / arrest                               | US      | Single | Tertiary / specialist centre | All in-patients                                                     | Code call / arrest                                              | No code call / arrest                                              | 192     | 96      |
| 4  |           |      |   |                                         |               |   |   |   |  |         |                       |         |               |                                                  |         |        |                              |                                                                     |                                                                 |                                                                    |         |         |
| 5  | Robson    | 2013 | Y | Bedside PEWS                            |               |   |   |   |  | Score   | Case-control          | No      | Retrospective | Code call / arrest                               | US      | Single | Tertiary / specialist centre | All in-patients                                                     | Code call / arrest                                              | No code call / arrest                                              | 192     | 96      |
| 6  |           |      |   |                                         |               |   |   |   |  |         |                       |         |               |                                                  |         |        |                              |                                                                     |                                                                 |                                                                    |         |         |
| 7  | Dean      | 2015 | N | Unclear                                 | Unclear       |   |   |   |  | Unclear | Cohort                | Unclear | Prospective   | PICU transfer / CD event                         | US      | Single | Unclear                      | All in-patients                                                     | PICU transfer / CD event                                        |                                                                    | Unclear | Unclear |
| 8  |           |      |   |                                         |               |   |   |   |  |         |                       |         |               |                                                  |         |        |                              |                                                                     |                                                                 |                                                                    |         |         |
| 9  | Fenix     | 2015 | Y | Modified Paediatric Early Warning Score | Brighton PEWS |   | ✓ | ✓ |  | Score   | Case-control          | Yes     | Retrospective | PICU transfer / CD event                         | US      | Single | Tertiary / specialist centre | All in-patients, except: haematology-oncology, surgical and cardiac | PICU transfer followed by CD event                              | PICU transfer but no CD event                                      | 97      | 51      |
| 10 |           |      |   |                                         |               |   |   |   |  |         |                       |         |               |                                                  |         |        |                              |                                                                     |                                                                 |                                                                    |         |         |
| 11 | Lin       | 2015 | N | Automated EHR-based tool                |               |   |   |   |  | Score   | Case-control          | No      | Retrospective | PICU transfer; Code call / arrest; senior review | US      | Single | Tertiary / specialist centre | All in-patients                                                     | PICU transfer; code call / arrest; senior review                | No transfer / arrest / review                                      | 2,310   | 701     |
| 12 |           |      |   |                                         |               |   |   |   |  |         |                       |         |               |                                                  |         |        |                              |                                                                     |                                                                 |                                                                    |         |         |
| 13 | Mandell   | 2015 | Y | Modified Paediatric Early Warning Score | Brighton PEWS | ✓ | ✓ | ✓ |  | Score   | Case-control          | Yes     | Prospective   | PICU re-admission                                | US      | Single | Tertiary / specialist centre | PICU discharge patients only                                        | PICU discharge to ward and re-admission to PICU within 48 hours | PICU discharge to ward and no re-admission to PICU within 48 hours | 189     | 38      |
| 14 |           |      |   |                                         |               |   |   |   |  |         |                       |         |               |                                                  |         |        |                              |                                                                     |                                                                 |                                                                    |         |         |
| 15 | Medar     | 2015 | N | Unclear                                 | Unclear       |   |   |   |  | Unclear | Case / chart review   | No      | Retrospective | RRT/MET call                                     | Unclear | Single | Unclear                      | All in-patients with RRT calls                                      | RRT call                                                        |                                                                    | 61      | 61      |
| 16 |           |      |   |                                         |               |   |   |   |  |         |                       |         |               |                                                  |         |        |                              |                                                                     |                                                                 |                                                                    |         |         |
| 17 | Ross      | 2015 | N | Bedside PEWS                            |               |   | ✓ |   |  | Score   | Case-control          | No      | Retrospective | Urgent ICU transfer                              | US      | Single | Tertiary / specialist centre | All in-patients                                                     | Urgent ICU transfer                                             | No ICU transfer                                                    | 4628    | 848     |
| 18 |           |      |   |                                         |               |   |   |   |  |         |                       |         |               |                                                  |         |        |                              |                                                                     |                                                                 |                                                                    |         |         |
| 19 | Gawronski | 2016 | Y | Bedside PEWS                            | 7-item        |   |   |   |  |         | Case-control (nested) | No      | Prospective   | Urgent ICU transfer; RRT / MET call; death       | Italy   | Single | Tertiary / specialist centre | Specialist unit only (stem-cell transplant)                         | Urgent ICU transfer; RRT / MET call; death                      | No transfers, RRT call or death                                    | 99      | 19      |
| 20 |           |      |   |                                         |               |   |   |   |  |         |                       |         |               |                                                  |         |        |                              |                                                                     |                                                                 |                                                                    |         |         |
| 21 | Mason     | 2016 | Y | NHS III PEWS                            |               |   |   |   |  | Score   | Cohort                | No      | Prospective   | PICU / HDU transfer, arrest or death             | UK      | Single | Tertiary / specialist centre | All in-patients                                                     | Any in-patient admission                                        |                                                                    | 1,000   | 16      |
| 22 |           |      |   |                                         |               |   |   |   |  |         |                       |         |               |                                                  |         |        |                              |                                                                     |                                                                 |                                                                    |         |         |
| 23 |           |      |   |                                         |               |   |   |   |  |         |                       |         |               |                                                  |         |        |                              |                                                                     |                                                                 |                                                                    |         |         |
| 24 |           |      |   |                                         |               |   |   |   |  |         |                       |         |               |                                                  |         |        |                              |                                                                     |                                                                 |                                                                    |         |         |
| 25 |           |      |   |                                         |               |   |   |   |  |         |                       |         |               |                                                  |         |        |                              |                                                                     |                                                                 |                                                                    |         |         |
| 26 |           |      |   |                                         |               |   |   |   |  |         |                       |         |               |                                                  |         |        |                              |                                                                     |                                                                 |                                                                    |         |         |
| 27 |           |      |   |                                         |               |   |   |   |  |         |                       |         |               |                                                  |         |        |                              |                                                                     |                                                                 |                                                                    |         |         |
| 28 |           |      |   |                                         |               |   |   |   |  |         |                       |         |               |                                                  |         |        |                              |                                                                     |                                                                 |                                                                    |         |         |
| 29 |           |      |   |                                         |               |   |   |   |  |         |                       |         |               |                                                  |         |        |                              |                                                                     |                                                                 |                                                                    |         |         |
| 30 |           |      |   |                                         |               |   |   |   |  |         |                       |         |               |                                                  |         |        |                              |                                                                     |                                                                 |                                                                    |         |         |
| 31 |           |      |   |                                         |               |   |   |   |  |         |                       |         |               |                                                  |         |        |                              |                                                                     |                                                                 |                                                                    |         |         |
| 32 |           |      |   |                                         |               |   |   |   |  |         |                       |         |               |                                                  |         |        |                              |                                                                     |                                                                 |                                                                    |         |         |
| 33 |           |      |   |                                         |               |   |   |   |  |         |                       |         |               |                                                  |         |        |                              |                                                                     |                                                                 |                                                                    |         |         |
| 34 |           |      |   |                                         |               |   |   |   |  |         |                       |         |               |                                                  |         |        |                              |                                                                     |                                                                 |                                                                    |         |         |
| 35 |           |      |   |                                         |               |   |   |   |  |         |                       |         |               |                                                  |         |        |                              |                                                                     |                                                                 |                                                                    |         |         |
| 36 |           |      |   |                                         |               |   |   |   |  |         |                       |         |               |                                                  |         |        |                              |                                                                     |                                                                 |                                                                    |         |         |
| 37 |           |      |   |                                         |               |   |   |   |  |         |                       |         |               |                                                  |         |        |                              |                                                                     |                                                                 |                                                                    |         |         |
| 38 |           |      |   |                                         |               |   |   |   |  |         |                       |         |               |                                                  |         |        |                              |                                                                     |                                                                 |                                                                    |         |         |
| 39 |           |      |   |                                         |               |   |   |   |  |         |                       |         |               |                                                  |         |        |                              |                                                                     |                                                                 |                                                                    |         |         |
| 40 |           |      |   |                                         |               |   |   |   |  |         |                       |         |               |                                                  |         |        |                              |                                                                     |                                                                 |                                                                    |         |         |
| 41 |           |      |   |                                         |               |   |   |   |  |         |                       |         |               |                                                  |         |        |                              |                                                                     |                                                                 |                                                                    |         |         |
| 42 |           |      |   |                                         |               |   |   |   |  |         |                       |         |               |                                                  |         |        |                              |                                                                     |                                                                 |                                                                    |         |         |
| 43 |           |      |   |                                         |               |   |   |   |  |         |                       |         |               |                                                  |         |        |                              |                                                                     |                                                                 |                                                                    |         |         |
| 44 |           |      |   |                                         |               |   |   |   |  |         |                       |         |               |                                                  |         |        |                              |                                                                     |                                                                 |                                                                    |         |         |
| 45 |           |      |   |                                         |               |   |   |   |  |         |                       |         |               |                                                  |         |        |                              |                                                                     |                                                                 |                                                                    |         |         |
| 46 |           |      |   |                                         |               |   |   |   |  |         |                       |         |               |                                                  |         |        |                              |                                                                     |                                                                 |                                                                    |         |         |
| 47 |           |      |   |                                         |               |   |   |   |  |         |                       |         |               |                                                  |         |        |                              |                                                                     |                                                                 |                                                                    |         |         |
| 48 |           |      |   |                                         |               |   |   |   |  |         |                       |         |               |                                                  |         |        |                              |                                                                     |                                                                 |                                                                    |         |         |
| 49 |           |      |   |                                         |               |   |   |   |  |         |                       |         |               |                                                  |         |        |                              |                                                                     |                                                                 |                                                                    |         |         |
| 50 |           |      |   |                                         |               |   |   |   |  |         |                       |         |               |                                                  |         |        |                              |                                                                     |                                                                 |                                                                    |         |         |
| 51 |           |      |   |                                         |               |   |   |   |  |         |                       |         |               |                                                  |         |        |                              |                                                                     |                                                                 |                                                                    |         |         |
| 52 |           |      |   |                                         |               |   |   |   |  |         |                       |         |               |                                                  |         |        |                              |                                                                     |                                                                 |                                                                    |         |         |
| 53 |           |      |   |                                         |               |   |   |   |  |         |                       |         |               |                                                  |         |        |                              |                                                                     |                                                                 |                                                                    |         |         |
| 54 |           |      |   |                                         |               |   |   |   |  |         |                       |         |               |                                                  |         |        |                              |                                                                     |                                                                 |                                                                    |         |         |
| 55 |           |      |   |                                         |               |   |   |   |  |         |                       |         |               |                                                  |         |        |                              |                                                                     |                                                                 |                                                                    |         |         |
| 56 |           |      |   |                                         |               |   |   |   |  |         |                       |         |               |                                                  |         |        |                              |                                                                     |                                                                 |                                                                    |         |         |
| 57 |           |      |   |                                         |               |   |   |   |  |         |                       |         |               |                                                  |         |        |                              |                                                                     |                                                                 |                                                                    |         |         |
| 58 |           |      |   |                                         |               |   |   |   |  |         |                       |         |               |                                                  |         |        |                              |                                                                     |                                                                 |                                                                    |         |         |
| 59 |           |      |   |                                         |               |   |   |   |  |         |                       |         |               |                                                  |         |        |                              |                                                                     |                                                                 |                                                                    |         |         |
| 60 |           |      |   |                                         |               |   |   |   |  |         |                       |         |               |                                                  |         |        |                              |                                                                     |                                                                 |                                                                    |         |         |



Supplementary table 3 - study characteristics of effectiveness studies

| First author | Year | Full text? | New PTTS | New RRT / MET | New escalation process linked to PTTS | Staff training / education package | Type of PTTS                                       | Modification from original version                                   | Existing RRT / MET? | Primary outcome measure         | Study design / analysis | Data collection (intervention period) | Country   | Setting                          | Study population                                   | Single / multi centre | Pre-intervention period (mths) | Post-intervention period (mths) |
|--------------|------|------------|----------|---------------|---------------------------------------|------------------------------------|----------------------------------------------------|----------------------------------------------------------------------|---------------------|---------------------------------|-------------------------|---------------------------------------|-----------|----------------------------------|----------------------------------------------------|-----------------------|--------------------------------|---------------------------------|
| Camacho      | 2011 | N          | ✓        |               |                                       |                                    | Brighton PEWS                                      | Modified thresholds / definitions                                    | Unclear             | Arrests / code calls            | Before & after study    | Prospective                           | US        | Tertiary / specialist            | Specialist ward only (cardiac & renal)             | Single                | 3                              | 5                               |
| Demmel       | 2010 | Y          | ✓        |               | ✓                                     | ✓                                  | Brighton PEWS                                      | Modified escalation algorithm; added "exception algorithm"           | Yes                 | Arrests / code calls            | Before & after study    | Prospective                           | US        | Tertiary / specialist            | Specialist ward only (haematology & oncology)      | Single                | Unclear                        | 8                               |
| Panesar      | 2014 | Y          |          |               | ✓                                     |                                    | Brighton PEWS                                      | Modified thresholds / definitions; mandated RRT call for high scores | No                  | RRT/MET calls                   | Before & after study    | Retrospective                         | US        | Tertiary / specialist            | All in-patients                                    | Single                | 18                             | 24                              |
| Sandhu       | 2010 | N          | ✓        | ✓             |                                       |                                    | Unclear                                            |                                                                      | Yes                 | Arrests / code calls            | Before & after study    | Retrospective                         | UK        | Tertiary / specialist            | Unclear                                            | Single                | Unclear                        | 3                               |
| Ambati       | 2014 | N          |          |               |                                       | ✓                                  | N/A                                                |                                                                      | Yes                 | RRT/MET calls                   | Before & after study    | Unclear                               | US        | Tertiary / specialist            | Unclear                                            | Single                | 12                             | 36                              |
| Duns         | 2014 | N          | ✓        |               |                                       |                                    | In-house activation criteria ("Between the Flags") |                                                                      | Yes                 | RRT/MET calls                   | Before & after study    | Prospective                           | Australia | Tertiary / specialist            | Unclear                                            | Single                | 24                             | 24                              |
| Hanson       | 2010 | Y          | ✓        | ✓             |                                       | ✓                                  | In-house activation criteria                       |                                                                      | No                  | Arrests / code calls            | Interrupted Time Series | Retrospective                         | US        | Tertiary / specialist            | All in-patients                                    | Single                | 11                             | 13                              |
| Heyden       | 2012 | N          | ✓        | ✓             |                                       |                                    | In-house activation criteria                       |                                                                      | No                  | Arrests / code calls            | Before & after study    | Unclear                               | US        | Tertiary / specialist            | All in-patients                                    | Single                | 24                             | 48                              |
| Hunt         | 2008 | Y          | ✓        | ✓             |                                       |                                    | In-house activation criteria                       |                                                                      | No                  | Arrests / code calls            | Before & after study    | Prospective                           | US        | Tertiary / specialist            | All in-patients                                    | Single                | 12                             | 12                              |
| Sornberg     | 2013 | N          | ✓        | ✓             |                                       |                                    | Unclear                                            |                                                                      | Unclear             | Arrests / code calls            | Before & after study    | Unclear                               | US        | Tertiary / specialist            | Unclear                                            | Single                | Unclear                        |                                 |
| Ocholi       | 2014 | N          | ✓        |               | ✓                                     |                                    | Bedside PEWS                                       | Unclear                                                              | Unclear             | Acuity at PICU admission        | Before & after study    | Unclear                               | UK        | Tertiary / specialist            | Unclear                                            | Single                | 6                              | 6                               |
| Parshuram    | 2011 | Y          | ✓        |               | ✓                                     | ✓                                  | Bedside PEWS                                       |                                                                      | No                  | "Clinical deterioration" events | Before & after study    | Prospective                           | Canada    | Community / DGH / non-specialist | All in-patients                                    | Single                | 3                              | 5                               |
| Norville     | 2013 | N          | ✓        |               | ✓                                     | ✓                                  | Paediatric Advance Warning Score (PAWS)            | Modified escalation algorithm                                        | Yes                 | Arrests / code calls            | Before & after study    | Unclear                               | US        | Tertiary / specialist            | Specialist ward only (Bone Marrow Transplant Unit) | Single                | 12                             | 11                              |
| Bonafide     | 2014 | Y          | ✓        | ✓             | ✓                                     |                                    | Bedside PEWS                                       |                                                                      | No                  | "Critical deterioration" events | Interrupted Time Series | Prospective                           | US        | Tertiary / specialist            | All in-patients                                    | Single                | 32                             | 27                              |
| Kotsakis     | 2011 | Y          | ✓        | ✓             |                                       | ✓                                  | Melbourne Activation Criteria                      | Removed items                                                        | No                  | Arrests / code calls            | Before & after study    | Prospective                           | Canada    | Tertiary / specialist            | All in-patients                                    | Multi                 | 24                             | 24                              |
| Mistry       | 2006 | Y          | ✓        | ✓             |                                       | ✓                                  | In-house activation criteria                       |                                                                      | No                  | Arrests / code calls            | Before & after study    | Prospective                           | US        | Tertiary / specialist            | All in-patients                                    | Single                | 6                              | 5                               |
| Randhawa     | 2011 | Y          | ✓        |               | ✓                                     | ✓                                  | Brighton PEWS*                                     | Modified escalation algorithm                                        | Yes                 | Arrests / code calls            | Before & after study    | Prospective                           | US        | Tertiary / specialist            | All in-patients                                    | Single                | 12                             | 12                              |
| Sharek       | 2007 | Y          | ✓        | ✓             |                                       | ✓                                  | Melbourne Activation Criteria                      | Removed items; modified thresholds /                                 | No                  | Mortality; Arrests / code calls | Before & after study    | Prospective                           | US        | Tertiary / specialist            | All in-patients                                    | Single                | 67                             | 17                              |



1  
2  
3  
4  
5  
6  
7  
8  
9  
10  
11  
12  
13  
14  
15  
16  
17  
18  
19  
20  
21  
22  
23  
24  
25  
26  
27  
28  
29  
30  
31  
32  
33  
34  
35  
36  
37  
38  
39  
40  
41  
42  
43  
44  
45  
46  
47

|          |      |   |   |   |   |   |                               |                                   |     |                                 |                      |               |           |                       |                  |        |    |    |  |
|----------|------|---|---|---|---|---|-------------------------------|-----------------------------------|-----|---------------------------------|----------------------|---------------|-----------|-----------------------|------------------|--------|----|----|--|
|          |      |   |   |   |   |   |                               | definitions                       |     |                                 |                      |               |           |                       |                  |        |    |    |  |
| Tibballs | 2005 | Y | ✓ | ✓ |   | ✓ | Melbourne Activation Criteria |                                   | No  | Mortality; Arrests / code calls | Before & after study | Prospective   | Australia | Tertiary / specialist | All in -patients | Single | 41 | 12 |  |
| Tibballs | 2009 | Y | ✓ | ✓ |   | ✓ | Melbourne Activation Criteria |                                   | No  | Mortality; Arrests / code calls | Before & after study | Prospective   | Australia | Tertiary / specialist | All in -patients | Single | 41 | 48 |  |
| Anwar    | 2010 | Y | ✓ | ✓ |   |   | In-house calling criteria     |                                   | No  | Arrests / call codes            | Before & after study | Retrospective | Pakistan  | Tertiary / specialist | All in -patients | Single | 9  | 9  |  |
| Zenker   | 2007 | Y | ✓ | ✓ |   |   | In-house calling criteria     |                                   | No  | Mortality; Arrests / code calls | Before & after study | Prospective   | US        | Tertiary / specialist | All in -patients | Single | 23 | 11 |  |
| Sefton   | 2014 | Y | ✓ |   | ✓ | ✓ | Bristol PEWS                  |                                   | No  | Acuity at PICU admission        | Before & after study | Retrospective | UK        | Tertiary / specialist | All in -patients | Single | 12 | 12 |  |
| Douglas  | 2016 | Y | ✓ |   | ✓ | ✓ | Brighton PEWS                 | Modified thresholds / definitions | Yes | RRT/MET calls                   | Before & after study | Retrospective | US        | Tertiary / specialist | All in -patients | Single | 12 | 12 |  |

For peer review only

Supplementary table 4 - findings of PTTS validation studies

| First author         | Year | Full text? | Type of PTTS                             | Based on                      | Score / trigger | Study design / analysis | Country     | Setting                      | Study population                         | Single / multi centre | Bench tested / implemented | Sample size | No of cases / adverse events | Outcome   |                    |                      |                |                       |               |       | Performance        |       |             |             |      |      |      | Notes |                             |                             |
|----------------------|------|------------|------------------------------------------|-------------------------------|-----------------|-------------------------|-------------|------------------------------|------------------------------------------|-----------------------|----------------------------|-------------|------------------------------|-----------|--------------------|----------------------|----------------|-----------------------|---------------|-------|--------------------|-------|-------------|-------------|------|------|------|-------|-----------------------------|-----------------------------|
|                      |      |            |                                          |                               |                 |                         |             |                              |                                          |                       |                            |             |                              | Mortality | Arrest / code call | PICU / PHDU transfer | RRT / MET call | Critical intervention | Senior review | Other | Threshold reported | AUROC | Sensitivity | Specificity | PPV  | NPV  | IRR  |       | Adherence                   |                             |
| Duncan               | 2006 | Y          | Paediatric Early Warning System score    |                               | Score           | Case-control            | Canada      | Tertiary / specialist centre | All in-patients                          | Single                | Bench tested               | 215         | 128                          |           | ✓                  |                      |                |                       |               |       |                    | 5     | 0.90        | 78.0        | 95.0 | 4.2  | -    |       | Yes                         |                             |
| Bell                 | 2013 | Y          | Texas Children's Hospital (TCH) PAWS     | Brighton PEWS                 | Score           | Chart review            | US          | Tertiary / specialist centre | General medicine & two specialist wards  | Single                | Implemented                | 150         |                              |           |                    |                      |                |                       |               |       |                    | 5     |             |             |      |      |      | Y     | No                          | Reliability statistics only |
| Edwards              | 2008 | Y          | Cardiff & Vale PEWS                      | Melbourne Activation Criteria | Score           | Cohort                  | UK          | Tertiary / specialist centre | All in-patients                          | Single                | Bench tested               | 1,000       | 16                           | ✓         | ✓                  | ✓                    |                |                       |               |       |                    | 2     | 0.86        | 69.5        | 89.9 | 5.9  | 99.7 | -     | Yes                         |                             |
| Egdell               | 2008 | Y          | Paediatric Advanced Warning Score (PAWS) |                               | Score           | Case-control            | UK          | Tertiary / specialist centre |                                          |                       | Bench tested               |             |                              |           |                    | ✓                    |                |                       |               |       |                    | 3     | 0.86        | 70.0        | 90.0 |      |      |       | No                          |                             |
| Fuijkschot (Study 1) | 2015 | Y          | Modified PEWS                            | Bedsides PEWS                 | Score           |                         | Netherlands |                              |                                          |                       | Implemented                | 118         | 15                           |           |                    |                      | ✓              | ✓                     | ✓             |       |                    | 8     |             |             |      |      |      | Yes   |                             |                             |
| Fuijkschot (Study 2) | 2015 | Y          | Modified PEWS                            | Bedsides PEWS                 | Score           |                         | Netherlands |                              |                                          |                       | Implemented                | Unclear     | 24                           |           |                    | ✓                    |                |                       |               |       |                    | 8     |             | 66.6        |      |      |      |       | No                          |                             |
| Fuijkschot (Study 3) | 2015 | Y          | Modified PEWS                            | Bedsides PEWS                 | Score           |                         | Netherlands |                              |                                          |                       | Implemented                | Unclear     | 14                           |           |                    |                      | ✓              |                       |               |       |                    | 8     |             | 100.0       |      |      |      |       | No                          |                             |
| Clayson              | 2014 | N          | Adjusted PEWT                            | Bristol PEWT                  | Trigger         | Cohort                  | UK          | Tertiary / specialist centre | Specialist ward only (cardiac)           | Single                | Implemented                | 126         |                              |           |                    |                      |                |                       |               |       |                    |       |             |             |      | 12.5 | 97.0 |       | No                          |                             |
| Rahman               | 2014 | N          | Burn-specific PEWS                       | Brighton PEWS                 | Score           | Case / chart review     | US          | Tertiary / specialist centre | Specialist ward only (burns unit)        | Single                | Unclear                    | 50          |                              |           |                    |                      |                |                       |               |       |                    |       |             |             |      |      |      | Yes   | Descriptive statistics only |                             |
| Wright               | 2011 | N          | Paediatric Early Warning Tool (PEWT)     | Bristol PEWT                  | Trigger         | Case / chart review     | UK          | Tertiary / specialist centre | All in-patients                          | Single                | Implemented                | 55          |                              |           | ✓                  |                      |                |                       |               |       |                    |       |             | 49.1        |      |      |      | Yes   |                             |                             |
| Hopkins              | 2013 | N          | Modified PEWS                            | Bedsides PEWS                 | Score           | Case-control            | US          | Tertiary / specialist centre | All in-patients                          | Single                | Unclear                    | 66          | 47                           |           |                    | ✓                    |                | ✓                     |               |       |                    |       |             |             |      |      |      | No    | Descriptive statistics only |                             |
| Gawronski            | 2013 | N          | Bedsides PEWS                            |                               | Score           | Case-control            | Italy       | Tertiary / specialist centre | Specialist ward only (bone marrow transp | Single                | Bench tested               | 11          | 10                           |           |                    | ✓                    |                |                       |               |       |                    |       |             |             |      |      |      | No    | Descriptive statistics only |                             |



1  
2  
3  
4  
5  
6  
7  
8  
9  
10  
11  
12  
13  
14  
15  
16  
17  
18  
19  
20  
21  
22  
23  
24  
25  
26  
27  
28  
29  
30  
31  
32  
33  
34  
35  
36  
37  
38  
39  
40  
41  
42  
43  
44  
45  
46  
47

|            |      |   |                                         |                                              |         |              |        |                              |                                                                      |        |              |         |         |  |  |  |  |  |  |         |      |          |      |      |      |      |    |     |
|------------|------|---|-----------------------------------------|----------------------------------------------|---------|--------------|--------|------------------------------|----------------------------------------------------------------------|--------|--------------|---------|---------|--|--|--|--|--|--|---------|------|----------|------|------|------|------|----|-----|
| Parshuram  | 2009 | Y | Bedside PEWS                            | Paediatric Early Warning System (PEWS) score | Score   | Case-control | Canada | Tertiary / specialist centre | All in-patients                                                      | Single | Bench tested | 180     | 60      |  |  |  |  |  |  | 8       | 0.91 | 82.0     | 93.0 |      |      |      |    | Yes |
| Tucker     | 2009 | Y | Modified Paediatric Early Warning Score | Brighton PEWS                                | Score   | Cohort       | US     | Tertiary / specialist centre | General medical unit only                                            | Single | Implemented  | 2,979   | 51      |  |  |  |  |  |  | 3       | 0.89 | 90.2     | 74.4 | 5.8  | 99.8 | Y    | No |     |
| Tume       | 2007 | Y | Bristol PEWT                            |                                              | Trigger | Chart review | UK     | Tertiary / specialist centre | Unplanned PICU/ PHDU transfers only                                  | Single | Bench tested | 29      | 29      |  |  |  |  |  |  |         |      | 88.0     |      |      |      |      | No |     |
| Tume       | 2007 | Y | Melbourne Activation Criteria           |                                              | Trigger | Chart review | UK     | Tertiary / specialist centre | Unplanned PICU/ PHDU transfers only                                  | Single | Bench tested | 29      | 29      |  |  |  |  |  |  |         |      | 88.0     |      |      |      |      | No |     |
| O'Loughlin | 2012 | N | Paediatric Early Warning Tool           | Bristol PEWT                                 | Trigger | Cohort       | UK     | Tertiary / specialist centre | All in-patients                                                      | Single | Implemented  | 331     | 7       |  |  |  |  |  |  | -       | 0.91 | 100.0    | 81.0 | 11.2 |      |      | No |     |
| Robson     | 2013 | Y | Paediatric Early Warning Tool           | Bristol PEWT                                 | Trigger | Case-control | US     | Tertiary / specialist centre | All in-patients                                                      | Single | Bench tested | 192     | 96      |  |  |  |  |  |  | -       | 0.75 | 76.3     | 61.5 |      |      |      |    |     |
| Robson     | 2013 | Y | PEW System Score                        |                                              | Score   | Case-control | US     | Tertiary / specialist centre | All in-patients                                                      | Single | Bench tested | 192     | 96      |  |  |  |  |  |  | 5       | 0.85 | 86.6     | 72.2 |      |      |      |    |     |
| Robson     | 2013 | Y | Bedside PEWS                            |                                              | Score   | Case-control | US     | Tertiary / specialist centre | All in-patients                                                      | Single | Bench tested | 192     | 96      |  |  |  |  |  |  | 7       | 0.73 | 56.3     | 78.1 |      |      |      |    |     |
| Dean       | 2015 | N | Unclear                                 | Unclear                                      | Unclear | Cohort       | US     | Unclear                      | General medical                                                      | Single | Unclear      | Unclear | Unclear |  |  |  |  |  |  | Unclear | 0.83 |          |      |      |      |      |    |     |
| Fenix      | 2015 | Y | Modified Paediatric Early Warning Score | Brighton PEWS                                | Score   | Case-control | US     | Tertiary / specialist centre | All in-patients, except: haematology, oncology, surgical and cardiac | Single | Implemented  | 97      | 51      |  |  |  |  |  |  | 3       |      | 80.0     | 43.0 |      |      |      |    |     |
| Lin        | 2015 | N | Automated EHR-based tool                |                                              | Score   | Case-control | US     | Tertiary / specialist centre | All in-patients                                                      | Single | Bench tested | 2,310   | 701     |  |  |  |  |  |  |         |      | 0.45/1.0 | 0.93 | 97.0 | 85.0 | 15.0 |    | No  |
| Mandell    | 2015 | Y | Modified Paediatric Early Warning Score | Brighton PEWS                                | Score   | Case-control | US     | Tertiary / specialist centre | PICU discharge patients only                                         | Single | Implemented  | 189     | 38      |  |  |  |  |  |  |         |      | 2        | 0.77 | 71.0 | 58.0 |      |    | No  |

1  
2  
3  
4  
5  
6  
7  
8  
9  
10  
11  
12  
13  
14  
15  
16  
17  
18  
19  
20  
21  
22  
23  
24  
25  
26  
27  
28  
29  
30  
31  
32  
33  
34  
35  
36  
37  
38  
39  
40  
41  
42  
43  
44  
45  
46  
47

|           |      |   |              |         |         |                       |         |                              |                                             |        |              |       |     |   |   |   |   |   |  |  |  |         |   |      |      |      |     |      |     |                       |
|-----------|------|---|--------------|---------|---------|-----------------------|---------|------------------------------|---------------------------------------------|--------|--------------|-------|-----|---|---|---|---|---|--|--|--|---------|---|------|------|------|-----|------|-----|-----------------------|
| Medar     | 2015 | N | Unclear      | Unclear | Unclear | Case / chart review   | Unclear | Unclear                      | All in-patients with RRT calls              | Single | Bench tested | 61    | 61  |   |   |   | ✓ |   |  |  |  | 3       |   | 57.3 |      |      |     |      | No  |                       |
| Ross      | 2015 | N | Bedside PEWS |         | Score   | Case-control          | US      | Tertiary / specialist centre | All in-patients                             | Single | Bench tested | 4628  | 848 |   |   |   | ✓ |   |  |  |  | Unclear |   | 70.0 | 84.0 |      |     |      | No  | Did not use resp data |
| Gawronski | 2016 | Y | Bedside PEWS | 7-item  | Score   | Case-control (nested) | Italy   | Tertiary / specialist centre | Specialist unit only (stem-cell transplant) | Single | Bench tested | 99    | 19  | ✓ |   |   | ✓ | ✓ |  |  |  |         | 6 |      | 79.0 | 97.5 |     |      | No  |                       |
| Mason     | 2016 | Y | NHS III PEWS |         | Score   | Cohort                | UK      | Tertiary / specialist centre | All in-patients                             | Single | Bench tested | 1,000 | 16  | ✓ | ✓ | ✓ |   |   |  |  |  |         | 2 | 0.83 | 73.2 | 75.2 | 2.6 | 99.7 | Yes |                       |

For peer review only

Supplementary table 5 – findings of effectiveness studies

| First author | Year | Full text ? | Intervention |               |                                       |                                    | Type of PTTS                                       | Modification from original version                                   | Existing RRT / MET? | Study design / analysis | Country   | Setting               | Study population                                   | Single / multi centre | Pre-intervention period (mths) | Post-intervention period (mths) | Reported outcomes |                                              |                                              |                          |                                                            |                           |
|--------------|------|-------------|--------------|---------------|---------------------------------------|------------------------------------|----------------------------------------------------|----------------------------------------------------------------------|---------------------|-------------------------|-----------|-----------------------|----------------------------------------------------|-----------------------|--------------------------------|---------------------------------|-------------------|----------------------------------------------|----------------------------------------------|--------------------------|------------------------------------------------------------|---------------------------|
|              |      |             | New PTTS     | New RRT / MET | New escalation process linked to PTTS | Staff training / education package |                                                    |                                                                      |                     |                         |           |                       |                                                    |                       |                                |                                 | Mortality         | Arrests / code calls                         | PICU / PHDU transfers                        | Acuity on PICU admission | Critical interventions                                     | RRT/MET calls             |
| Camacho      | 2011 | N           | ✓            |               |                                       |                                    | Brighton PEWS                                      | Modified thresholds / definitions                                    | Unclear             | Before & after study    | US        | Tertiary / specialist | Specialist ward only (cardiac & renal)             | Single                | 3                              | 5                               |                   |                                              |                                              |                          |                                                            |                           |
| Demmel       | 2010 | Y           | ✓            |               | ✓                                     | ✓                                  | Brighton PEWS                                      | Modified escalation algorithm; added "exception algorithm"           | Yes                 | Before & after study    | US        | Tertiary / specialist | Specialist ward only (haematology & oncology)      | Single                | Unclear                        | 8                               |                   |                                              |                                              |                          |                                                            |                           |
| Panesar      | 2014 | Y           |              |               | ✓                                     |                                    | Brighton PEWS                                      | Modified thresholds / definitions; mandated RRT call for high scores | No                  | Before & after study    | US        | Tertiary / specialist | All in-patients                                    | Single                | 18                             | 24                              |                   |                                              |                                              |                          |                                                            |                           |
| Sandhu       | 2010 | N           | ✓            | ✓             |                                       |                                    | Unclear                                            |                                                                      | Yes                 | Before & after study    | UK        | Tertiary / specialist | Unclear                                            | Single                | Unclear                        | 3                               |                   |                                              |                                              |                          |                                                            |                           |
| Ambati       | 2014 | N           |              |               |                                       | ✓                                  | N/A                                                |                                                                      | Yes                 | Before & after study    | US        | Tertiary / specialist | Unclear                                            | Single                | 12                             | 36                              |                   |                                              |                                              |                          |                                                            |                           |
| Duns         | 2014 | N           | ✓            |               |                                       |                                    | In-house activation criteria ("Between the Flags") |                                                                      | Yes                 | Before & after study    | Australia | Tertiary / specialist | Unclear                                            | Single                | 24                             | 24                              | ↓                 |                                              |                                              |                          | ↑                                                          | Per 1,000 ward admissions |
| Hanson       | 2010 | Y           | ✓            | ✓             |                                       | ✓                                  | In-house activation criteria                       |                                                                      | No                  | Interrupted Time Series | US        | Tertiary / specialist | All in-patients                                    | Single                | 11                             | 13                              | ↓                 | ↓                                            |                                              |                          |                                                            | Per 1,000 ward admissions |
| Heyden       | 2012 | N           | ✓            | ✓             |                                       |                                    | In-house activation criteria                       |                                                                      | No                  | Before & after study    | US        | Tertiary / specialist | All in-patients                                    | Single                | 24                             | 48                              |                   | ↓** (arrests)                                |                                              |                          | ↑                                                          | None used                 |
| Hunt         | 2008 | Y           | ✓            | ✓             |                                       |                                    | In-house activation criteria                       |                                                                      | No                  | Before & after study    | US        | Tertiary / specialist | All in-patients                                    | Single                | 12                             | 12                              |                   | ↓* (respiratory arrests only)                |                                              |                          |                                                            | Per 1,000 patient-days    |
| Sornberg     | 2013 | N           | ✓            | ✓             |                                       |                                    | Unclear                                            |                                                                      | Unclear             | Observational study     | US        | Non-specialist        | Unclear                                            | Single                | Unclear                        |                                 |                   |                                              |                                              |                          |                                                            |                           |
| Ocholi       | 2014 | N           | ✓            |               | ✓                                     |                                    | Bedside PEWS                                       | Unclear                                                              | Unclear             | Before & after study    | UK        | Tertiary / specialist | Unclear                                            | Single                | 6                              | 6                               |                   |                                              |                                              |                          |                                                            |                           |
| Parshuram    | 2011 | Y           | ✓            |               | ✓                                     | ✓                                  | Bedside PEWS                                       |                                                                      | No                  | Before & after study    | Canada    | Non-specialist        | All in-patients                                    | Single                | 3                              | 5                               |                   |                                              | ↑* (transfers to external specialist centre) |                          | ↓** (critical intervention prior to transfer)              | Per 1,000 patient-days    |
| Norville     | 2013 | N           | ✓            |               | ✓                                     | ✓                                  | Brighton PEWS                                      | Modified thresholds / definitions; modified escalation algorithm     | Yes                 | Before & after study    | US        | Tertiary / specialist | Specialist ward only (Bone Marrow Transplant Unit) | Single                | 12                             | 11                              |                   |                                              |                                              |                          |                                                            |                           |
| Bonafide     | 2014 | Y           | ✓            | ✓             | ✓                                     |                                    | Bedside PEWS                                       |                                                                      | No                  | Interrupted Time Series | US        | Tertiary / specialist | All in-patients                                    | Single                | 32                             | 27                              |                   | ↓                                            | ↑                                            |                          | ↓** (critical intervention within 12hrs of PICU admission) | Per 1,000 patient-days    |
| Kotsakis     | 2011 | Y           | ✓            | ✓             |                                       | ✓                                  | Melbourne Activation Criteria                      | Removed items; modified escalation                                   | No                  | Before & after study    | Canada    | Tertiary / specialist | All in-patients                                    | Multi                 | 24                             | 24                              |                   | ↓** (code blue calls but not actual arrests) |                                              |                          |                                                            | Per 1,000 ward admissions |



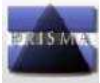

# PRISMA 2009 Checklist

| Section/topic                      | #  | Checklist item                                                                                                                                                                                                                                                                                              | Reported on page # |
|------------------------------------|----|-------------------------------------------------------------------------------------------------------------------------------------------------------------------------------------------------------------------------------------------------------------------------------------------------------------|--------------------|
| <b>TITLE</b>                       |    |                                                                                                                                                                                                                                                                                                             |                    |
| Title                              | 1  | Identify the report as a systematic review, meta-analysis, or both.                                                                                                                                                                                                                                         | 1                  |
| <b>ABSTRACT</b>                    |    |                                                                                                                                                                                                                                                                                                             |                    |
| Structured summary                 | 2  | Provide a structured summary including, as applicable: background; objectives; data sources; study eligibility criteria, participants, and interventions; study appraisal and synthesis methods; results; limitations; conclusions and implications of key findings; systematic review registration number. | 3-4                |
| <b>INTRODUCTION</b>                |    |                                                                                                                                                                                                                                                                                                             |                    |
| Rationale                          | 3  | Describe the rationale for the review in the context of what is already known.                                                                                                                                                                                                                              | 4-5                |
| Objectives                         | 4  | Provide an explicit statement of questions being addressed with reference to participants, interventions, comparisons, outcomes, and study design (PICOS).                                                                                                                                                  | 5                  |
| <b>METHODS</b>                     |    |                                                                                                                                                                                                                                                                                                             |                    |
| Protocol and registration          | 5  | Indicate if a review protocol exists, if and where it can be accessed (e.g., Web address), and, if available, provide registration information including registration number.                                                                                                                               | 6                  |
| Eligibility criteria               | 6  | Specify study characteristics (e.g., PICOS, length of follow-up) and report characteristics (e.g., years considered, language, publication status) used as criteria for eligibility, giving rationale.                                                                                                      | 6                  |
| Information sources                | 7  | Describe all information sources (e.g., databases with dates of coverage, contact with study authors to identify additional studies) in the search and date last searched.                                                                                                                                  | 6-7                |
| Search                             | 8  | Present full electronic search strategy for at least one database, including any limits used, such that it could be repeated.                                                                                                                                                                               | Supp table 1       |
| Study selection                    | 9  | State the process for selecting studies (i.e., screening, eligibility, included in systematic review, and, if applicable, included in the meta-analysis).                                                                                                                                                   | 7                  |
| Data collection process            | 10 | Describe method of data extraction from reports (e.g., piloted forms, independently, in duplicate) and any processes for obtaining and confirming data from investigators.                                                                                                                                  | 7                  |
| Data items                         | 11 | List and define all variables for which data were sought (e.g., PICOS, funding sources) and any assumptions and simplifications made.                                                                                                                                                                       | 7                  |
| Risk of bias in individual studies | 12 | Describe methods used for assessing risk of bias of individual studies (including specification of whether this was done at the study or outcome level), and how this information is to be used in any data synthesis.                                                                                      | 7                  |
| Summary measures                   | 13 | State the principal summary measures (e.g., risk ratio, difference in means).                                                                                                                                                                                                                               | NA                 |
| Synthesis of results               | 14 | Describe the methods of handling data and combining results of studies, if done, including measures of consistency (e.g., $I^2$ ) for each meta-analysis.                                                                                                                                                   | NA                 |



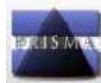

# PRISMA 2009 Checklist

Page 1 of 2

| Section/topic                 | #  | Checklist item                                                                                                                                                                                           | Reported on page # |
|-------------------------------|----|----------------------------------------------------------------------------------------------------------------------------------------------------------------------------------------------------------|--------------------|
| Risk of bias across studies   | 15 | Specify any assessment of risk of bias that may affect the cumulative evidence (e.g., publication bias, selective reporting within studies).                                                             | NA                 |
| Additional analyses           | 16 | Describe methods of additional analyses (e.g., sensitivity or subgroup analyses, meta-regression), if done, indicating which were pre-specified.                                                         | NA                 |
| <b>RESULTS</b>                |    |                                                                                                                                                                                                          |                    |
| Study selection               | 17 | Give numbers of studies screened, assessed for eligibility, and included in the review, with reasons for exclusions at each stage, ideally with a flow diagram.                                          | 8                  |
| Study characteristics         | 18 | For each study, present characteristics for which data were extracted (e.g., study size, PICOS, follow-up period) and provide the citations.                                                             | 8                  |
| Risk of bias within studies   | 19 | Present data on risk of bias of each study and, if available, any outcome level assessment (see item 12).                                                                                                | Supp table 2/3     |
| Results of individual studies | 20 | For all outcomes considered (benefits or harms), present, for each study: (a) simple summary data for each intervention group (b) effect estimates and confidence intervals, ideally with a forest plot. | Supp table 2/3     |
| Synthesis of results          | 21 | Present results of each meta-analysis done, including confidence intervals and measures of consistency.                                                                                                  | NA                 |
| Risk of bias across studies   | 22 | Present results of any assessment of risk of bias across studies (see Item 15).                                                                                                                          | NA                 |
| Additional analysis           | 23 | Give results of additional analyses, if done (e.g., sensitivity or subgroup analyses, meta-regression [see Item 16]).                                                                                    | NA                 |
| <b>DISCUSSION</b>             |    |                                                                                                                                                                                                          |                    |
| Summary of evidence           | 24 | Summarize the main findings including the strength of evidence for each main outcome; consider their relevance to key groups (e.g., healthcare providers, users, and policy makers).                     | 15                 |
| Limitations                   | 25 | Discuss limitations at study and outcome level (e.g., risk of bias), and at review-level (e.g., incomplete retrieval of identified research, reporting bias).                                            | 15-19              |
| Conclusions                   | 26 | Provide a general interpretation of the results in the context of other evidence, and implications for future research.                                                                                  | 15-19              |
| <b>FUNDING</b>                |    |                                                                                                                                                                                                          |                    |
| Funding                       | 27 | Describe sources of funding for the systematic review and other support (e.g., supply of data); role of funders for the systematic review.                                                               | 19                 |

From: Moher D, Liberati A, Tetzlaff J, Altman DG, The PRISMA Group (2009). Preferred Reporting Items for Systematic Reviews and Meta-Analyses: The PRISMA Statement. PLoS Med 6(7): e1000097. doi:10.1371/journal.pmed1000097

For more information, visit: [www.prisma-statement.org](http://www.prisma-statement.org).

For peer review only - <http://bmjopen.bmj.com/site/about/guidelines.xhtml>

# BMJ Open

## Validity and effectiveness of paediatric early warning systems and track and trigger tools for identifying and reducing clinical deterioration in hospitalised children: a systematic review

|                                 |                                                                                                                                                                                                                                                                                                                                                                                                                                                                                                                                                                                                                                                                                                                                                                                                                                                                                                                                                                                                                                                                                                                                                                                                                                                                                                                                   |
|---------------------------------|-----------------------------------------------------------------------------------------------------------------------------------------------------------------------------------------------------------------------------------------------------------------------------------------------------------------------------------------------------------------------------------------------------------------------------------------------------------------------------------------------------------------------------------------------------------------------------------------------------------------------------------------------------------------------------------------------------------------------------------------------------------------------------------------------------------------------------------------------------------------------------------------------------------------------------------------------------------------------------------------------------------------------------------------------------------------------------------------------------------------------------------------------------------------------------------------------------------------------------------------------------------------------------------------------------------------------------------|
| Journal:                        | <i>BMJ Open</i>                                                                                                                                                                                                                                                                                                                                                                                                                                                                                                                                                                                                                                                                                                                                                                                                                                                                                                                                                                                                                                                                                                                                                                                                                                                                                                                   |
| Manuscript ID                   | bmjopen-2018-022105.R1                                                                                                                                                                                                                                                                                                                                                                                                                                                                                                                                                                                                                                                                                                                                                                                                                                                                                                                                                                                                                                                                                                                                                                                                                                                                                                            |
| Article Type:                   | Research                                                                                                                                                                                                                                                                                                                                                                                                                                                                                                                                                                                                                                                                                                                                                                                                                                                                                                                                                                                                                                                                                                                                                                                                                                                                                                                          |
| Date Submitted by the Author:   | 20-Sep-2018                                                                                                                                                                                                                                                                                                                                                                                                                                                                                                                                                                                                                                                                                                                                                                                                                                                                                                                                                                                                                                                                                                                                                                                                                                                                                                                       |
| Complete List of Authors:       | Trubey, Rob; Cardiff University, Centre for Trials Research<br>Huang, Chao; Cardiff University, Centre for Trials Research<br>Lugg-Widger, Fiona; Cardiff University, Centre for Trials Research<br>Hood, Kerenza; Cardiff University, Centre for Trials Research<br>Allen, Davina; Cardiff University, School of Healthcare Sciences<br>Edwards, Dawn; Morriston Hospital, Department of Paediatrics<br>Lacy, David; Wirral University Teaching Hospital<br>Lloyd, Amy; Cardiff University, Centre for Trials Research<br>Mann, Mala; Cardiff University, University Library Services<br>Mason, Brendan; Public Health Wales<br>Oliver, Alison; Noah's Ark Children's Hospital for Wales, Department of Paediatric Intensive Care<br>Roland, Damian; Paediatric Emergency Medicine Leicester Academic (PEMLA) Group, Emergency Department<br>Sefton, G.; Alder Hey Children's NHS Fdn Trust,<br>Skone, Richard; Noah's Ark Children's Hospital for Wales, Department of Paediatric Intensive Care<br>Thomas-Jones, Emma; Cardiff University, Centre for Trials Research<br>Tume, Lyvonne N.; University of the West of England Bristol, Faculty of Health and Applied Sciences (HAS)<br>Powell, Colin; Children's Hospital for Wales, Paediatrics; Sidra Medical and Research Center, Department of Pediatric Emergency Medicine |
| <b>Primary Subject Heading</b>: | Paediatrics                                                                                                                                                                                                                                                                                                                                                                                                                                                                                                                                                                                                                                                                                                                                                                                                                                                                                                                                                                                                                                                                                                                                                                                                                                                                                                                       |
| Secondary Subject Heading:      | Paediatrics, Nursing, Intensive care, Health policy, Diagnostics                                                                                                                                                                                                                                                                                                                                                                                                                                                                                                                                                                                                                                                                                                                                                                                                                                                                                                                                                                                                                                                                                                                                                                                                                                                                  |
| Keywords:                       | Quality in health care < HEALTH SERVICES ADMINISTRATION & MANAGEMENT, Paediatric intensive & critical care < INTENSIVE & CRITICAL CARE, PAEDIATRICS                                                                                                                                                                                                                                                                                                                                                                                                                                                                                                                                                                                                                                                                                                                                                                                                                                                                                                                                                                                                                                                                                                                                                                               |
|                                 |                                                                                                                                                                                                                                                                                                                                                                                                                                                                                                                                                                                                                                                                                                                                                                                                                                                                                                                                                                                                                                                                                                                                                                                                                                                                                                                                   |

SCHOLARONE™  
Manuscripts

1  
2  
3  
4  
5  
6  
7  
8  
9  
10  
11  
12  
13  
14  
15  
16  
17  
18  
19  
20  
21  
22  
23  
24  
25  
26  
27  
28  
29  
30  
31  
32  
33  
34  
35  
36  
37  
38  
39  
40  
41  
42  
43  
44  
45  
46  
47  
48  
49  
50  
51  
52  
53  
54  
55  
56  
57  
58  
59  
60

1  
2  
3 **Validity and effectiveness of paediatric early warning systems and track and trigger**  
4 **tools for identifying and reducing clinical deterioration in hospitalised children: a**  
5 **systematic review**  
6

7 **Authors:** Rob Trubey<sup>1†</sup>, Chao Huang<sup>1</sup>, Fiona Lugg-Widger<sup>1</sup>, Kerenza Hood<sup>1</sup>, Davina Allen<sup>2</sup>,  
8 Dawn Edwards<sup>3</sup>, David Lacy<sup>4</sup>, Amy Lloyd<sup>1</sup>, Mala Mann<sup>5</sup>, Brendan Mason<sup>6</sup>, Alison Oliver<sup>7</sup>,  
9 Damian Roland<sup>8</sup>, Gerri Sefton<sup>9</sup>, Richard Skone<sup>7</sup>, Emma Thomas-Jones<sup>1</sup>, Lyvonne Tume<sup>9</sup>,  
10 Colin Powell<sup>10,11</sup>  
11

12 **1** Centre for Trials Research, Cardiff University, Heath Park, Cardiff, UK

13 **2** School of Healthcare Sciences, Cardiff University, Eastgate House, Cardiff, UK

14 **3** Department of Paediatrics, Morriston Hospital, Swansea, UK

15 **4** Wirral University Teaching Hospital, Wirral, UK

16 **5** Specialist Unit for Review Evidence (SURE), Cardiff University, Heath Park, Cardiff, UK

17 **6** Public Health Wales, Cardiff, UK

18 **7** Department of Paediatric Intensive Care, Children's Hospital for Wales, Cardiff, UK

19 **8** Paediatric Emergency Medicine Leicester Academic (PEMLA) Group, Emergency  
20 Department, Infirmary Square, Leicester, UK

21 **9** Paediatric Intensive Care Unit, Alder Hey Children's NHS Foundation Trust, Liverpool,  
22 UK

23 **10** Department of Child Health, Children's Hospital for Wales, Division of Population  
24 Medicine School of Medicine, Cardiff University, Cardiff, UK,

25 **11** Department of Pediatric Emergency Medicine, Sidra Medicine, Doha, Qatar

26 **Corresponding author:**

27 Dr. Rob Trubey, Centre for Trials Research, Cardiff University, Heath Park, Cardiff, UK  
28 [trubeyrj@cf.ac.uk](mailto:trubeyrj@cf.ac.uk)  
29

30 **Keywords:** PEWS, track and trigger scores, early warning scores, clinical deterioration,  
31 children, systematic review  
32  
33  
34  
35  
36  
37  
38  
39  
40  
41  
42  
43  
44  
45  
46  
47  
48  
49  
50  
51  
52  
53  
54  
55  
56  
57  
58  
59  
60

## ABSTRACT

### Objectives

To assess (1) how well validated existing paediatric track and trigger tools (PTTT) are for predicting in-patient deterioration, and (2) how effective paediatric early warning systems (with or without a PTTT) are at reducing mortality and morbidity outcomes in hospitalised children.

### Methods

A systematic search was carried out through May 2018, across several databases. Supplementary searches were carried out to identify published and unpublished literature. Studies reporting on the development and validation of PTTT and effectiveness of broader early warning systems were eligible for inclusion. Study selection, data extraction and quality assessment were conducted by two independent reviewers and disagreements resolved by discussion. PROSPERO registration number CRD42015015326.

### Results

36 validation studies and 30 effectiveness studies were included, with 27 unique PTTT identified. Outcome measures varied considerably for both research questions. Validation studies were largely retrospective, case-control studies or chart reviews: some PTTT demonstrated very good or excellent diagnostic accuracy across multiple studies (primarily for predicting PICU transfers) but PPV values were consistently low, suggesting the potential for alarm fatigue. No studies accounted for the co-occurrence of routine clinical intervention when assessing the relationship between PTTT scores and subsequent deterioration. Effectiveness studies were predominantly uncontrolled before-after studies. Overall, there was limited evidence of paediatric early warning system interventions leading to reduced rates of deterioration. Some studies reported significant decreases in mortality, arrests or code calls, but were limited by methodological concerns.

### Conclusion

There are a number of fundamental methodological limitations in the PTTT literature, and a predominance of single-site studies carried out in specialist centres limits generalisability. With limited evidence of effectiveness, we would argue that calls to make PTTT mandatory

1  
2  
3 across all paediatric units are not supported by the evidence base. More work is needed to  
4 understand the impact of PTTT implementation on the wider clinical microsystem.  
5  
6  
7  
8  
9  
10  
11  
12  
13  
14  
15  
16  
17  
18  
19  
20  
21  
22  
23  
24  
25  
26  
27  
28  
29  
30  
31  
32  
33  
34  
35  
36  
37  
38  
39  
40  
41  
42  
43  
44  
45  
46  
47  
48  
49  
50  
51  
52  
53  
54  
55  
56  
57  
58  
59  
60

For peer review only

## STRENGTHS AND LIMITATIONS OF THIS STUDY

- Paediatric early warning systems and paediatric track and trigger tools (PTTT) are increasingly used by paediatric units across Europe, North America, Australia and elsewhere – this study is a timely review of the evidence for their validity and effectiveness
- A comprehensive search was carried out across multiple databases and included published as well as grey literature
- The review highlights methodological weaknesses and gaps in the current evidence base and makes suggestions for future research
- Heterogeneity in study populations, study designs and outcome measures make it difficult to compare and synthesise findings across the wide range of early warning systems and PTTT being used in practice
- The review is limited in scope to quantitative validation and effectiveness studies, so must be considered alongside wider literature reflecting on potential secondary benefits of early warning systems and PTTT for communication, teamwork and empowerment

## BACKGROUND

Failure to recognise and respond to clinical deterioration in hospitalised children is a major safety concern in healthcare. The underlying causes of this problem are clearly multi-factorial<sup>1-3</sup> but paediatric ‘early warning systems’ have been strongly advocated as one approach to improving recognition of deterioration in paediatric units<sup>1,2,4</sup>.

A paediatric ‘early warning system’ can be considered any patient safety initiative or programme which aims to monitor, detect and respond to signs of deterioration in hospitalised children in order to avert adverse outcomes and premature death. Such systems are often multi-faceted and may include the use of rapid response teams (RRT) or medical emergency teams (MET), education or training to improve clinical staff’s ability to identify deterioration or strategies aimed at improving staff communication and situational awareness.

An increasingly commonplace paediatric ‘early warning system’ initiative is the use of a ‘track and trigger tool’: these tools, also commonly used in adult care, provide a formal framework for evaluating routine physiological, clinical and observational data for early indicators of patient deterioration. They are typically integrated into routine observation charts or electronic health records and compare patient observations to pre-defined ‘normal’ thresholds. When one or more observation is considered abnormal, staff are directed to various clinical actions, including but not limited to altered frequency of observations, review by senior staff or more appropriate treatment or management. Tools may be paper based or electronic and monitoring may be automated or manually undertaken by staff.

These tools have been referred to in the literature using a number of different terms: paediatric early warning scores (PEWS); paediatric early warning tools (PEWT), track and trigger tools (TTT) and many others. Here, we refer to the tools themselves using the term ‘paediatric track and trigger tools’ (PTTT). A variety of PTTT have been developed, typically by teams based in specialist paediatric centres and often used as a means of triggering a dedicated response team. Their advocacy has recently led to widespread uptake across a variety of different paediatric units, including many non-specialist centres where patient populations and resources may differ. In the United Kingdom (UK), a recent cross-sectional survey found that 85% of paediatric units were using some form of PTTT, most of which were non-specialist centres without a dedicated response team<sup>5</sup>. Despite their widespread use, recent reviews have questioned the evidence-base for their effectiveness in improving patient outcomes<sup>6,7</sup>. The current review aimed to build on this work, assessing in depth the evidence



1  
2  
3 base for both the validity of PTTT for predicting in-patient deterioration and the effectiveness  
4 of broader 'early warning systems' at reducing instances of mortality and morbidity in  
5 paediatric settings:  
6  
7

- 8 • Question 1: How well validated are existing paediatric track and trigger tools (PTTT)  
9 and their component parts for predicting in-patient deterioration?
- 10 • Question 2: How effective are paediatric early warning systems (with or without a  
11 PTTT) at reducing mortality and critical events?  
12  
13  
14  
15  
16  
17  
18  
19  
20  
21  
22  
23  
24  
25  
26  
27  
28  
29  
30  
31  
32  
33  
34  
35  
36  
37  
38  
39  
40  
41  
42  
43  
44  
45  
46  
47  
48  
49  
50  
51  
52  
53  
54  
55  
56  
57  
58  
59  
60

For peer review only

## METHODS

This systematic review was conducted and reported in accordance with the Preferred Reporting Items for Systematic Review and Meta-Analyses (PRISMA) guidelines<sup>8</sup>. Our review protocol is registered with the PROSPERO database CRD42015015326.

### Search strategy

A comprehensive search was conducted across a range of databases to identify relevant studies in the English language. Published and unpublished literature was considered where publicly available, as were studies in press. The following databases were searched through May 2018: British Nursing Index, CINAHL (Cumulative Index of Nursing and Allied Health Literature), Cochrane Central Register of Controlled Trials, Database of Abstracts of Reviews of Effectiveness, EMBASE, HMIC (Health Management Information Centre), Medline, Medline in Process, Scopus and Web of Knowledge (Science Citation Indexes). To identify additional papers, published, unpublished or research reported in the grey literature a range of relevant websites and trial registers were searched including Clinical Trials.gov. To identify published papers that had not yet been catalogued in the electronic databases, recent editions of key journals were hand-searched. The search terms included 'early warning scores', 'alert criteria', 'rapid response', 'track and trigger' and 'early medical intervention'. (Supplementary Table 1)

### Eligibility screening and study selection

PICOS parameters guided inclusion criteria for the validation and effectiveness studies (Supplementary Table 2). Papers reporting development of validation of a PTTT were included for Question 1, whereas papers reporting the implementation of any broader 'paediatric early warning system' (with or without a PTTT) were eligible for Question 2. Both research questions were limited to studies that involved in-patients aged 0-18. Outcome measures considered were mortality and critical events, including: unplanned admission to a higher level of care, cardiac arrest, respiratory arrest, medical emergencies requiring immediate assistance, children reviewed by Paediatric Intensive Care Unit (PICU) staff on the ward (in specialist centres) or reviewed by external PICU staff (for non-specialist centres), acuity at PICU admission and PICU outcomes. A range of study designs were considered for both questions.

1  
2  
3 Two of the review authors independently screened the titles and abstracts yielded in the  
4 search. Full texts were reviewed independently by six reviewers against the above eligibility  
5 criteria and were assigned to the relevant review question if included. Reasons for exclusion  
6 were recorded. Separate data extraction forms were developed for validation and  
7 effectiveness studies. The forms had common elements (study design, country, setting, study  
8 population, description of the PTTT or early warning system, statistical techniques used,  
9 outcomes assessed). Additional data items for validation studies included the items in the  
10 PTTT, modifications to the PTTT from previous versions, predictive ability of individual  
11 items and the overall tool, sensitivity and specificity and inter and intra-rater reliability.  
12 Effectiveness studies included an assessment of outcomes in terms of mortality and various  
13 morbidity variables. Data extraction was carried out by two reviewers and discrepancies were  
14 resolved by discussion. Risk ratios (RR) and P-values were reported or calculated for all  
15 effectiveness outcomes, where available.  
16  
17  
18  
19  
20  
21  
22  
23

### 24 **Quality appraisal**

25  
26 Methodological quality and risk of bias was assessed for each included study using a  
27 modified version of the Downs and Black rating scale<sup>9</sup> (templates shown in Supplementary  
28 Table 3).  
29  
30

### 31 **Patient and Public Involvement**

32  
33 This review was conducted as part of a larger mixed-methods study (ISRCTN94228292),  
34 which used a formal, facilitated parental advisory group. The group comprised parents of  
35 children who had experienced an unexpected adverse event in a paediatric unit and provided  
36 input which helped to shape the broader research questions and outcome measures. The  
37 results of the review will be disseminated to parents through this group.  
38  
39  
40  
41  
42  
43  
44  
45  
46  
47  
48  
49  
50  
51  
52  
53  
54  
55  
56  
57  
58  
59  
60

## REVIEW RESULTS

Figure 1 shows the PRISMA flow diagram for both research questions.

[FIGURE 1]

### Study characteristics

Table 1 summarises the study characteristics of the 36 validation (Question 1) and 30 effectiveness (Question 2) papers included in the review.

| Validation studies (n=36)    |    |      | Effectiveness studies (n=30) |    |      |
|------------------------------|----|------|------------------------------|----|------|
|                              | N  | %    |                              | n  | %    |
| <b>Type</b>                  |    |      | <b>Type</b>                  |    |      |
| Full text                    | 22 | 61.1 | Full text                    | 21 | 70.0 |
| Abstract                     | 14 | 38.9 | Abstract                     | 9  | 30.0 |
|                              |    |      |                              |    |      |
| <b>Country</b>               |    |      | <b>Country</b>               |    |      |
| United States                | 15 | 41.7 | United States                | 18 | 60.0 |
| United Kingdom               | 12 | 33.3 | United Kingdom               | 3  | 10.0 |
| Canada                       | 2  | 5.5  | Canada                       | 2  | 6.7  |
| Australia                    | 0  | 0.0  | Australia                    | 3  | 10.0 |
| Other                        | 5  | 13.9 | Other                        | 3  | 10.0 |
| Multiple                     | 1  | 2.8  | Multiple                     | 1  | 3.3  |
| Unclear                      | 1  | 2.8  | Unclear                      | 0  | 0.0  |
|                              |    |      |                              |    |      |
| <b>Year of study</b>         |    |      | <b>Year of study</b>         |    |      |
| Pre-2012                     | 10 | 27.8 | Pre-2012                     | 15 | 50.0 |
| 2012                         | 3  | 8.3  | 2012                         | 1  | 3.3  |
| 2013                         | 6  | 16.7 | 2013                         | 2  | 6.7  |
| 2014                         | 5  | 13.9 | 2014                         | 6  | 20.0 |
| 2015                         | 7  | 19.4 | 2015                         | 0  | 0.0  |
| 2016                         | 2  | 5.6  | 2016                         | 2  | 6.7  |
| 2017                         | 3  | 8.3  | 2017                         | 1  | 3.3  |
| 2018                         | 0  | 0.0  | 2018                         | 3  | 10.0 |
|                              |    |      |                              |    |      |
| <b>Setting</b>               |    |      | <b>Setting</b>               |    |      |
| Specialist / tertiary        | 33 | 91.7 | Specialist / tertiary        | 29 | 96.7 |
| Non-specialist / community   | 0  | 0.0  | Non-specialist / community   | 1  | 3.3  |
| Unclear                      | 3  | 8.3  | Unclear                      | 0  | 0.0  |
|                              |    |      |                              |    |      |
| <b>Single / multi-centre</b> |    |      | <b>Single / multi-centre</b> |    |      |
| Single-centre                | 35 | 97.2 | Single-centre                | 28 | 93.3 |
| Multi-centre                 | 1  | 2.8  | Multi-centre                 | 2  | 6.7  |
|                              |    |      |                              |    |      |
| <b>Study population</b>      |    |      | <b>Study population</b>      |    |      |
| General in-patients          | 23 | 63.9 | General in-patients          | 20 | 66.6 |
| Specialist population        | 11 | 30.6 | Specialist population        | 5  | 16.7 |
| Unclear                      | 2  | 5.6  | Unclear                      | 5  | 16.7 |
|                              |    |      |                              |    |      |
| <b>Study design</b>          |    |      | <b>Study design</b>          |    |      |
| Cohort                       | 7  | 19.4 | Uncontrolled before-after    | 26 | 86.7 |

|                     |    |      |                          |   |     |
|---------------------|----|------|--------------------------|---|-----|
| Case-control        | 18 | 50.0 | Controlled before-after  | 1 | 3.3 |
| Case / chart review | 10 | 27.8 | Interrupted Time Series  | 2 | 6.7 |
| Pilot study         | 1  | 2.8  | Cluster randomised trial | 1 | 3.3 |

**Table 1: Summary study characteristics of validation and effectiveness papers in the review**

## Types of PTTS and components

Across 66 studies, we identified 27 unique PTTT (Table 2). Twenty PTTTs were based on one of four different tools: Monaghan's Brighton PEWS<sup>10</sup>, the Bedside PEWS<sup>11</sup>, the Bristol PEWT<sup>12</sup> and the Melbourne Activation Criteria<sup>13</sup>. Other PTTT described in the literature included the National Health Service Institute for Innovation and Improvement (NHS III) PEWS<sup>14</sup> (the second most commonly used PTTT in United Kingdom paediatric settings<sup>5</sup>), RRT and MET activation criteria<sup>15-18</sup>, and one prediction algorithm developed from a large dataset of electronic health data<sup>19</sup>.

[TABLE 2]

Table 2 illustrates the range of physiological and behavioural parameters underpinning PTTT. Common parameters included heart rate (present in 26 out of 27 PTTT), respiratory rate (24), respiratory effort (24) and level of consciousness or behavioural state (24). All PTTT required at least six different parameters to be collected.

## Question 1 – How well validated are PTTT and component parts for predicting in-patient deterioration?

Nine validation papers meeting inclusion criteria were excluded from analysis: eight did not report any performance characteristics of the PTTT for predicting deterioration<sup>20-27</sup> and one study calculated incorrect sensitivity/specificity outcomes<sup>12</sup> (Supplementary Table 4). The remaining 27 validation studies, evaluating the performance of 18 unique PTTT, are described in Table 3. Four studies evaluated multiple PTTTs<sup>3,19,28,29</sup> and one paper described three separate studies of the same PTTT<sup>30</sup>.

[TABLE 3]

Five cohort studies were included<sup>14,31-34</sup>, three based on the same dataset. All other studies were either case-control or chart reviews. Thirteen papers implemented the PTTT in practice<sup>23,30,31,34-43</sup>, while the remaining studies 'bench tested' the PTTT – researchers retrospectively calculated the score based on data abstracted from medical charts and records. All studies were conducted in specialist centres with only one multi-centre study reported<sup>44</sup>.

## Outcome measures

PTTT were evaluated for their ability to predict a wide range of clinical outcomes. Composite measures were used in eight studies<sup>14,23,29,32,33,37,45,46</sup>, cardiac/respiratory arrest or a “code call” was used (singularly or part of a composite outcome) in six studies<sup>23,28,29,37,45,47</sup>, while 22 studies used transfer to a PICU or PHDU as the main outcome<sup>3,11,19,23,28–34,36,37,39,41–44,46,48,49</sup>.

#### *Predictive ability of individual PTTT components*

Three validation papers reported on the performance characteristics of individual components of the tool for predicting adverse outcomes<sup>11,33,42</sup>. Parshuram and colleagues, for instance, reported AUROC values for individual PTTT items of a pilot version of the Bedside PEWS: ranging from 0.54 (bolus fluid) to 0.81 (heart rate), compared to 0.91 for the overall PTTT<sup>11</sup>. All other studies reported outcomes for the PTTT as a whole.

#### *Paediatric Early Warning System (PEWS) score*

The predictive ability of the 16-item PEWS score was assessed by one internal<sup>47</sup> (AUROC=0.90) and two external case-control studies<sup>28,29</sup> (AUROC range =0.82-0.88) with a range of outcome measures and scoring thresholds. One case-control study used an observed prevalence rate to calculate a PPV of 4.2% for the tool in predicting code calls<sup>47</sup> (for every 1,000 patients triggering the PTTT, 42 would be expected to deteriorate).

#### *Bedside PEWS and derivatives*

The Bedside PEWS was evaluated in one internal<sup>11</sup> (AUROC=0.91) and five external case-control studies<sup>19,28,29,44,46</sup> (AUROC range=0.73-0.90) for a range of different outcome measures and at different scoring thresholds. One case-control study calculated a PPV of 2.1% for identifying children requiring urgent PICU transfer within 24 hours of admission, based on locally observed prevalence rates<sup>19</sup>. A modified version of the Bedside PEWS (with temperature added) demonstrated an AUROC of 0.86 in an external case-control study with a composite outcome of death, arrest or unplanned PICU transfer<sup>29</sup>.

#### *Brighton PEWS and derivatives*

Six different PTTT based on the original Brighton PEWS were evaluated across 11 studies. Tucker and colleagues reported a large prospective cohort study of their Modified Brighton PEWS (a) to test prediction of PICU transfers (AUROC=0.92, PPV=5.8%)<sup>31</sup>. An external case-control study tested the same score for predicting urgent PICU transfers within 24 hours of admission (AUROC=0.74, PPV= 2.1%)<sup>19</sup>.

1  
2  
3 An external case-control study used a composite measure of death, arrest or PICU transfer to  
4 evaluate Akre *et al.*'s Modified Brighton PEWS (b) (AUROC=0.79) and Skaltezky's  
5 Modified Brighton PEWS (d) (AUROC=0.74)<sup>29</sup>. Skaltezky and colleagues also evaluated  
6 their own tool in an internal case-control study for predicting PICU transfer (AUROC=0.82)  
7  
8  
9 48

10  
11 The Children's Hospital Early Warning Score (CHEWS) had a reported AUROC of 0.90 for  
12 predicting PICU transfers or arrests in a large internal case-control study<sup>50</sup>. A version of the  
13 same tool modified for cardiac patients, the Cardiac CHEWS (C-CHEWS) was evaluated by  
14 one internal study on a cardiac unit<sup>37</sup> (AUROC = 0.90) looking at arrests or unplanned PICU  
15 transfers, and two external studies of oncology / haematology units<sup>41,42</sup> for the same outcome  
16 (AUROC=0.95). Finally, the Children's Hospital Los Angeles (CHLA) PEWS was evaluated  
17 by in a small internal case-control study for prediction of re-admission to PICU after initial  
18 PICU discharge<sup>40</sup> (AUROC=0.71).

#### 24 25 *Melbourne Activation Criteria (MAC) and derivatives*

26  
27 The MAC was assessed by one external case-control study with an outcome of death, arrest  
28 or unplanned PICU transfer<sup>29</sup> (AUROC=0.71) and a large external cohort study with an  
29 outcome of death or unplanned PICU or HDU transfer<sup>33</sup> (AUROC=0.79, PPV=3.6%). A  
30 derivative of the MAC using an aggregate score, the Cardiff & Vale PEWS (C&VPEWS),  
31 was tested using the same cohort and outcome measures in an earlier external study  
32 (AUROC=0.86, PPV=5.9%)<sup>32</sup> and was the best performing PTTT in an external case-control  
33 study evaluating multiple PTTT<sup>29</sup> (AUROC=0.89).  
34  
35  
36  
37

#### 38 39 *Bristol PEWT*

40  
41 The Bristol PEWT was evaluated by five external validation studies: two chart review  
42 studies<sup>3,35</sup> (no AUROC), one small cohort study of PICU transfers<sup>34</sup> (AUROC=0.91,  
43 PPV=11%), and two case-control studies looking at code calls<sup>28</sup> (AUROC=0.75) and a  
44 composite of death, arrests and PICU transfers<sup>29</sup> (AUROC=0.62).  
45  
46  
47

#### 48 49 *Other PTTT*

50  
51 The NHS Institute for Improvement and Innovation (NHS III) PEWS was tested by one  
52 external cohort study looking at a composite of death or unplanned transfers to PICU or  
53 HDU<sup>14</sup> (AUROC=0.88, PPV=4.3%) and one external case-control study looking at a  
54 composite of death, arrests and PICU transfers<sup>29</sup> (AUROC=0.82). Zhai and colleagues  
55 developed and retrospectively evaluated a logistic regression algorithm in an internal case-  
56  
57  
58  
59

control study looking at urgent PICU transfers in the first 24 hours of admission<sup>19</sup> (AUROC =0.91, PPV=4.8%).

Across PTTT, studies reporting performance characteristics of a tool at a range of different scoring thresholds demonstrate the expected interaction and trade-off between sensitivity and specificity – at lower triggering thresholds, sensitivity is high but specificity is low; at higher thresholds, the opposite is true.

#### *Inter-rater reliability and completeness of data*

Accurate assessment of the ability of a PTTT to predict clinical deterioration is contingent on accuracy and reliability of tool scoring (whether by bedside nurses in practice or by researchers abstracting data) and the availability of underpinning observations. Only five papers made reference to accuracy or reliability of scoring<sup>28,31,37,42,45</sup>, with mixed results: Tucker *et al.* implemented their PTTT and reported that two nurses scored 55 patients on their modification of the Brighton PEWS<sup>31</sup>, achieving an intra-class coefficient of 0.92, but McLellan *et al.*, reported only 67% agreement in scoring on their C-CHEWS tool between a study nurse and the bedside nurse<sup>37</sup>. Completeness of data was reported in 11 studies<sup>11,14,19,29,30,32,33,42,44,45,47</sup>. Fuijkschot *et al.*<sup>30</sup> reported that in 59% of cases reviewed “the PEWS was correctly performed and could be used for inclusion in the study”, Edwards *et al.*<sup>33</sup> bench-tested the C&VPEWS and found an average completeness rate of 44% for the seven different parameters, while Parshuram *et al.*<sup>44</sup> reported in a multi-centre study of the Bedside PEWS that “only 5.1% [of observation sets] had measurements on all 7 items”.

#### **Question 2 – how effective are early warning systems at reducing mortality and critical events in hospitalised children?**

Eleven papers meeting inclusion criteria were excluded from analysis for providing insufficient statistical information (e.g., denominator data, absolute numbers of events) to calculate effect sizes<sup>39,51–59</sup>. Further details on papers excluded from analysis are provided in Supplementary Table 5. Findings from the 19 studies included in the analysis are summarised in Table 4.

[TABLE 4]

#### *Type of early warning system interventions*

Seventeen interventions involved the introduction of a new PTTT, one intervention introduced a mandatory triggering element to an existing PTTT<sup>60</sup>, and one study reported a



1  
2  
3 large, multi-centre analysis of MET introduction with no details on PTTT use<sup>61</sup>. Twelve  
4 interventions included the introduction of a new MET or RRT<sup>13,15-18,62-68</sup>, while four further  
5 interventions introduced a new PTTT in a hospital with an existing MET or RRT. Only three  
6 studies therefore evaluated a PTTT in the absence of a dedicated response team<sup>69-71</sup>. A staff  
7 education programme was explicitly described in ten interventions<sup>13,15,17,63,65,67,69-72</sup>.

11 Of the 18 studies that used a PTTT, only seven used a tool that had been formally evaluated  
12 for validity: three used the Bedside PEWS<sup>62,65,70</sup>, two used the MAC<sup>13,67</sup>, one used the  
13 Modified Brighton PEWS (b)<sup>72</sup> and one used the C-CHEWS<sup>71</sup>. One study did not report the  
14 PTTT used<sup>63</sup>, while ten studies used a variety of calling criteria and local modifications to  
15 validated tools that had not been evaluated for validity<sup>15-18,60,64,66,68,69,73</sup>.

#### 19 *Mortality (ward or hospital wide)*

21 Two uncontrolled before-after studies (both with MET/RRT) reported significant mortality  
22 rate reductions post intervention: one in hospital wide deaths per 100 discharges<sup>17</sup> (RR=0.82,  
23 95% CI=0.70-0.95) and one in total hospital deaths per 1,000 admissions (RR=0.65, 0.57-  
24 0.75) and deaths on the ward ('unexpected deaths') per 1,000 admissions<sup>67</sup> (RR=0.35, 0.13-  
25 0.92). Seven studies found no reductions in mortality, including two high quality multi-centre  
26 studies<sup>13,15,61,62,64,65,68</sup>. Parshuram and colleagues conducted a cluster randomised trial and  
27 found no difference in all-cause hospital mortality rates between 10 hospitals randomly  
28 selected to receive an intervention centred around use of the Bedside PEWS and 11 usual  
29 care hospitals, one year post intervention (OR=1.01, 0.61-1.69)<sup>65</sup>. Kutty *et al.* assessed the  
30 impact of MET implementation in 38 US paediatric hospitals with an interrupted time series  
31 study, and reported no difference in the slope of hospital mortality rates five years post  
32 intervention and the expected slope based on pre-implementation trends (OR = 0.94, 0.93-  
33 0.95)<sup>61</sup>.

#### 34 *PICU mortality*

36 Two uncontrolled before-after studies (both with MET/RRT) reported a significant post-  
37 intervention reduction in rates of PICU mortality among ward transfers (RR=0.31, 0.13-  
38 0.72)<sup>18</sup>, and PICU mortality rates among patients readmitted within 48 hours (RR=0.43, 0.17-  
39 0.99)<sup>64</sup>. Six studies (including a high quality cluster randomised trial and interrupted time  
40 series study) reported no post-intervention change in PICU mortality using a variety of  
41 metrics<sup>62,65,66,69,71,73</sup>.

#### 42 *Cardiac and respiratory arrests*

Two uncontrolled before-after studies (both with RRT/MET) reported significant post-intervention rate reductions in sub-categories of cardiac arrests: one in 'near cardiopulmonary arrests'<sup>64</sup> (RR=0.54, 0.52-0.57) but not 'actual cardiopulmonary arrests' and one in 'preventable cardiac arrests'<sup>67</sup> (RR=0.45, 0.20-0.97) but not 'unexpected cardiac arrests'. One uncontrolled before-after study (with RRT/MET) reported a significant post intervention reduction in rates of ward respiratory arrests per 1,000 patient-days<sup>16</sup> (RR=0.27, 0.05-1.01). Seven studies (including one high quality cluster randomised trial and one high quality interrupted time series study) found no change in cardiac arrest rates using a variety of metrics<sup>13,15,16,62,63,65</sup> or cardiac and respiratory arrests combined<sup>68</sup>.

#### *Calls for urgent review / assistance*

Three uncontrolled before-after studies (all with RRT/MET) reported significant post-intervention reductions in rates of code calls<sup>15,17,64</sup> (RR=0.42, 0.17-1.03; RR=0.29, 0.10-0.65; RR=0.71, 0.61-0.83) while two studies found no change in rates of code calls<sup>18,72</sup>. One uncontrolled before-after study in a community hospital (without RRT/MET) found significant post intervention reductions in rates of urgent calls to the in-house paediatrician (RR=0.23, 0.11-0.46) and respiratory therapist<sup>70</sup> (RR=0.36, 0.13-0.95). Two uncontrolled before-after studies (with RRT/MET) found increases in rates of RRT calls<sup>72</sup> (RR=1.59, 1.33-1.90) and outreach team calls<sup>73</sup> (RR=1.92, 1.79-2.07). One study found no change in rates of RRT calls<sup>60</sup>.

#### *PICU transfers*

One uncontrolled before-after study (without RRT/MET) found a significant post-intervention decrease in the rate of unplanned PICU transfers per 1,000 patient-days<sup>71</sup> (RR=0.70, 0.56-0.88). One uncontrolled before-after study (without RRT/MET) found a significant post-intervention increase in the rate of transfers to external specialist units (RR=1.37, 0.51-3.63), but with a significant decrease in the rate of 'clinical deterioration events' on the ward (RR=0.18, 0.02-1.97)<sup>70</sup>. Three studies (including one high quality cluster randomised trial and one high quality interrupted time series study) found no change in rates of PICU admissions post intervention<sup>62,65,73</sup>.

#### *PICU outcomes*

Two studies, one interrupted time series and one multi-centre cluster randomised trial (both with RRT/MET), found significant reductions in rates of 'critical deterioration events' (life-sustaining interventions administered within 12 hours of PICU admission) relative to pre-

1  
2  
3 implementation trends and relative to control hospitals respectively (IRR=0.38, 0.20-0.75;  
4 OR=0.77, 0.61-0.97)<sup>62,65</sup>. One controlled before-after study (without RRT/MET) reported a  
5 significant reduction in rates of invasive ventilation given to emergency PICU admissions  
6 post intervention (RR=0.83, 0.72-0.97) with no significant change observed in a control  
7 group of patients admitted to PICU from outside of the hospital<sup>69</sup>. One uncontrolled before-  
8 after study reported a significant post-intervention decrease in rates of PICU admissions  
9 receiving mechanical ventilation (RR=0.85, 0.73-0.99) but an increase in rates of early  
10 intubation (RR=1.87, 1.33-2.62)<sup>66</sup>.

### 16 *Implementation outcomes*

18 Only three studies reported outcomes relating to the quality of implementation of the  
19 intervention. Parshuram and colleagues reported 99% of audited observation sets of the  
20 Bedside PEWS had at least 5 vital signs present post-intervention, up from 76% pre-  
21 intervention (no change in control hospitals)<sup>65</sup>. A previous Bedside PEWS study reported 3%  
22 of audited cases had used the incorrect age chart but reported an intra-class coefficient of 0.90  
23 for agreement between bedside nurses scoring the PTTT in practice and research nurses  
24 retrospectively assigned scores<sup>70</sup>. Finally, Agulnik and colleagues evaluated error rates in C-  
25 CHEWS scoring, observing an initial 47% rate of errors that reduced to below 10% by the  
26 end of the study<sup>71</sup>.

## 33 **DISCUSSION**

35 This paper reviewed the published PTTT and early warning system literature in order to  
36 assess the validity of PTTT for predicting in-patient deterioration (Question 1) and the  
37 effectiveness of early warning system interventions (with or without PTTT) for reducing  
38 mortality and morbidity outcomes in hospitalised children (Question 2). We believe that the  
39 consideration of broader 'early warning systems' differentiates this paper from previous  
40 reviews, as does the inclusion of two recently published high-quality effectiveness  
41 studies<sup>61,65</sup>.

### 48 **How well validated are existing tools for predicting in-patient deterioration?**

50 Given a growing understanding and emphasis on the importance of local context in  
51 healthcare interventions, it is perhaps not surprising that such a wide range of PTTT have  
52 been developed and evaluated internationally, and modifications to existing PTTT are  
53 common. The result, however, is that a large number of different PTTT have been narrowly  
54 validated, but none have been broadly validated across a variety of different settings and  
55  
56  
57  
58  
59  
60

1  
2  
3 populations. With only one exception<sup>44</sup>, all studies evaluating the validity of PTTT have been  
4 single-centre reports from specialist units, greatly limiting the generalisability of the findings.  
5

6 PTTT such as the Bedside PEWS, C&VPEWS, NHS III PEWS and C-CHEWS have  
7 demonstrated very good (AUROC  $\geq 0.80$ ) or excellent (AUROC  $\geq 0.90$ ) diagnostic accuracy,  
8 typically for predicting PICU transfers, in internal and external validation  
9 studies<sup>11,14,19,32,37,42,44,74</sup>. However, methodological issues common to the validation studies  
10 mean that such results need to be interpreted with a degree of caution. Firstly, each of the  
11 studies was conducted in a clinical setting where paediatric in-patients are subject to various  
12 forms of routine clinical intervention throughout their admission. This automatically  
13 complicates the relationship between patients' PTTT scores at different time points and the  
14 subsequent occurrence (or not) of deterioration – across the study window, patients will have  
15 received a variety of different clinical interventions which will have impacted their chances  
16 of deteriorating. Indeed, the majority of outcomes used in the validation studies are clinical  
17 interventions themselves (e.g., PICU transfer). There are numerous statistical modelling  
18 techniques which can account for co-occurrence of clinical interventions and the longitudinal  
19 nature of the predictors<sup>75,76</sup>, but none of these were used in the validation studies and so  
20 estimates of predictive ability are likely to be distorted. Secondly, while it understandable  
21 that a majority of studies 'bench-tested' the PTTT rather than implement it into practice  
22 before evaluation, the process of abstracting PTTT scores retrospectively from patient charts  
23 and medical records introduces a number of sources of potential bias or inaccuracy. For  
24 instance, several studies reported either high levels of missing data (i.e., some of the  
25 observations required to populate the PTTT score being evaluated were not routinely  
26 collected or recorded and so were scored as 'normal')<sup>11,19,32,44,45</sup> or difficulty in abstracting  
27 certain descriptive or subjective PTTT components<sup>19,28,41,49</sup>. Assuming missing values are  
28 normal, or excluding some PTTT items for analysis are both likely to skew the results.  
29 Finally, studies which evaluated a PTTT that had been implemented in practice are at risk of  
30 overestimating the ability of PTTT to predict proxy outcomes such as PICU transfer,  
31 inasmuch as high PTTT scores or triggers automatically direct staff towards escalation of  
32 care, or clinical actions which make escalation of care more likely.  
33  
34  
35  
36  
37  
38  
39  
40  
41  
42  
43  
44  
45  
46  
47  
48  
49

50 The findings reported in several PTTT studies point towards two potential challenges for  
51 some centres in implementing and sustaining a PTTT in clinical practice. As noted above, a  
52 number of studies that retrospectively 'bench-tested' a PTTT reported that the observations  
53 that were required to score the tool were not always routinely collected or recorded in their  
54  
55  
56  
57  
58  
59  
60

1  
2  
3 centre. It may be that the introduction of a PTTT into practice would help create a framework  
4 to ensure that core vital signs and observations were collected more routinely (as  
5 demonstrated by Parshuram and colleagues<sup>65</sup>) but this would obviously have resource  
6 implications that could be a potential barrier for some centres. Such considerations are  
7 important, as evidence from the adult literature points to the potential for tools to  
8 inadvertently mask deterioration when core observations are missing<sup>77</sup>. Secondly, PPV values  
9 reported in cohort studies, and case-control studies that adjusted for outcome prevalence,  
10 were uniformly low (between 2.3%-5.9%)<sup>14,19,31-33,47</sup>. They demonstrate that even PTTT  
11 which demonstrate good predictive performance are likely to generate a large amount of  
12 'false alarms' because adverse outcomes are so rare. For some centres, these issues may be  
13 mitigated to some extent by dedicated response teams or other available resources, but other  
14 hospitals may not be able to sustain the increased workload of responding to PTTT triggers.  
15  
16  
17  
18  
19  
20  
21  
22

### 23 **How effective are early warning systems for reducing mortality and morbidity?**

24 We found limited evidence for early warning system interventions reducing mortality or  
25 arrest rates in hospitalised children. While some effectiveness papers did report significant  
26 reductions in rates of mortality (on the ward or in PICU) or cardiac arrests after  
27 implementation of different early warning system interventions<sup>16-18,64,67</sup>, they were all  
28 uncontrolled before-after studies which have inherent limitations in terms of establishing  
29 causality. They do not preclude the possibility that outcome rates would have improved over  
30 time regardless of the intervention<sup>78</sup> or changes were caused by other factors, and their  
31 inclusion is accordingly discouraged by some Cochrane review groups<sup>79</sup>. Three high quality  
32 multi-centre studies - two interrupted time series studies and a recent cluster randomised trial  
33 - found no changes in rates or trends of mortality or arrests post intervention<sup>61,62,65</sup>.  
34  
35  
36  
37  
38  
39  
40

41 There was also limited evidence for early warning systems reducing PICU transfers or calls  
42 for urgent review. Again, a small number of uncontrolled before-after studies reported  
43 significant reductions post-intervention<sup>15,17,64</sup>, but several other studies reported significant  
44 increases in transfers or calls for review<sup>70,72,73</sup> or no post-intervention changes. We did find  
45 moderate evidence across four studies - including a controlled before-after study, a multi-  
46 centre interrupted time series study and a multi-centre cluster randomised trial - for early  
47 warning system interventions reducing rates of early critical interventions in children  
48 transferred to PICU<sup>62,65,66,69</sup>. Such results are promising, but corresponding reductions in  
49 hospital or PICU mortality rates have not yet been reported.  
50  
51  
52  
53  
54  
55  
56  
57  
58  
59  
60

1  
2  
3 Implementing complex interventions in a healthcare setting is challenging and evidence from  
4 the adult literature points to challenges and barriers to successfully implement TTT in  
5 practice<sup>80-82</sup>. However, given so few effectiveness studies reported on implementation  
6 outcomes, it is difficult to know whether negative findings reflect poor effectiveness or  
7 implementation of early warning systems. Again, effectiveness studies were predominantly  
8 carried out in specialist centres – and in all but three cases, involved the use of a dedicated  
9 response team – greatly limiting generalisability outside of these contexts.  
10  
11  
12  
13

#### 14 *Limitations of the review*

15  
16 There are several limitations of the current review. Firstly, despite purposely widening the  
17 scope of the effectiveness review question to include paediatric ‘early warning systems’ with  
18 or without a PTTT, we identified very few studies that did not employ a PTTT as part of the  
19 intervention. In part, this likely reflects the fact that PTTT have become almost synonymous  
20 with early warning systems, but it is also possible that our search strategy may have missed  
21 some broader early warning system initiatives that were not explicitly labelled as such.  
22 Secondly, our inclusion criteria for study selection were deliberately broad and so resulted in  
23 our including several validation and effectiveness studies that were subsequently excluded  
24 from analysis due to insufficient statistical detail or methodological issues. Finally, the scope  
25 of the current review was limited to consideration of quantitative validation and effectiveness  
26 studies. We are mindful of research suggesting that implementing PTTT in practice may  
27 confer secondary benefits including, but not limited to improvements in communication,  
28 teamwork and empowerment of junior staff to call for assistance<sup>83-85</sup>.  
29  
30  
31  
32  
33  
34  
35  
36  
37

#### 38 **Conclusion**

39  
40 The PTTT literature is currently characterised by an ‘absence of evidence’ rather than an  
41 ‘evidence of absence’. PTTT seem like a logical tool for helping staff detect and respond to  
42 deteriorating patients, but the existing evidence base is too limited to form clear judgements  
43 of their utility. We would argue that there has been too much confidence placed in the  
44 statistical findings of validation studies of PTTT, given methodological limitations in the  
45 study designs. There is evidence of consistently high false-alarm rates and bench-testing  
46 studies point to unreliable availability of many underlying observations: as such there is  
47 reason for caution in considering the viability of PTTT for all hospitals. Almost all of the  
48 early warning systems and PTTT reported in the literature have been developed and  
49 evaluated in specialist centres, typically in units with access to dedicated response teams –  
50  
51  
52  
53  
54  
55  
56  
57  
58  
59  
60

1  
2  
3 yet PTTT appear to be commonly adopted by non-specialist units with little modification.  
4 With limited current evidence for 'early warning systems' that use a PTTT reducing  
5 deterioration or death in practice, we would urge caution among policymakers in calling for  
6 their use to become mandatory across all hospitals. We acknowledge the potential for PTTT  
7 to confer a range of secondary benefits in areas such as communication, teamwork and  
8 empowerment of junior staff. Indeed, we would argue that more work is required to  
9 understand the wider impact of PTTT implementation in different clinical settings before it is  
10 possible to evaluate their overall contribution to the wider safety mechanisms and systems  
11 aimed at identifying and responding to deteriorating in paediatric patients.  
12  
13  
14  
15  
16  
17  
18  
19  
20  
21  
22  
23  
24  
25  
26  
27  
28  
29  
30  
31  
32  
33  
34  
35  
36  
37  
38  
39  
40  
41  
42  
43  
44  
45  
46  
47  
48  
49  
50  
51  
52  
53  
54  
55  
56  
57  
58  
59  
60



## FOOTNOTES

### Contributors

RT: screening and review of papers, contribution to design of work, preparation of manuscript; CH: screening and review of papers, contribution to concept and design of work, review of manuscript; FL: contribution to design of work, screening and review of papers, review of manuscript; KH: contribution to concept and design of work, screening and review of papers, review of manuscript; CP, DR, BM, AO, DE, RS, GS, DL, LT, DA, AL, ETJ: contribution to concept and design of work, screening and review of papers, review of manuscript; MM: information specialist, review of manuscript.

### Acknowledgements

We would like to acknowledge the contribution of Dr James Bunn to the review.

### Competing interests

None declared.

### Funding

This study is funded by the National Institute for Health Research (NIHR) Health Services and Delivery Research (HS&DR) programme (12/178/17).

### Data sharing statement

No additional data are available.



1  
2  
3  
4  
5  
6  
7  
8  
9  
10  
11  
12  
13  
14  
15  
16  
17  
18  
19  
20  
21  
22  
23  
24  
25  
26  
27  
28  
29  
30  
31  
32  
33  
34  
35  
36  
37  
38  
39  
40  
41  
42  
43  
44  
45  
46  
47  
48  
49  
50  
51  
52  
53  
54  
55  
56  
57  
58  
59  
60

**FIGURE LEGENDS**

**Figure 1 – PRISMA flow diagram of study inclusion**

For peer review only

## REFERENCES

1. Pearson, G. a (Ed). *Why Children Die: A Pilot Study 2006; England (South West, North East and West Midlands), Wales and Northern Ireland*. (2008). doi:ISBN: 978-0-9558055-0-9
2. Joint Commission. 2009 National Patient Safety Goals, Requirements and Rationales. *Jt. Comm. Perspect. Patient Saf.* **8**, 8–12 (2009).
3. Tume, L. The deterioration of children in ward areas in a specialist children's hospital. *Nurs. Crit. Care* **12**, 12–19 (2007).
4. NICE. Acutely ill patients in hospital: Recognition of and response to acute illness in adults in hospital. *NICE Clin. Guidel.* **50** 1–107 (2007). doi:10.1136/bmj.39272.679688.47
5. Roland, D., Oliver, A., Edwards, E. D., Mason, B. W. & Powell, C. V. E. Use of paediatric early warning systems in Great Britain: has there been a change of practice in the last 7 years? *Arch. Dis. Child.* **99**, 26–9 (2014).
6. Chapman, S. M., Wray, J., Oulton, K. & Peters, M. J. Systematic review of paediatric track and trigger systems for hospitalised children. *Resuscitation* **109**, 87–109 (2016).
7. Lambert, V., Matthews, A., MacDonell, R. & Fitzsimons, J. Paediatric early warning systems for detecting and responding to clinical deterioration in children: a systematic review. *BMJ Open* **7**, e014497 (2017).
8. Moher, D., Liberati, A., Tetzlaff, J. & Altman, D. G. Preferred reporting items for systematic reviews and meta-analyses: the PRISMA statement. *BMJ* **339**, (2009).
9. Downs, S. H. & Black, N. The feasibility of creating a checklist for the assessment of the methodological quality both of randomised and non-randomised studies of health care interventions. *J. Epidemiol. Community Health* **52**, 377–384 (1998).
10. Monaghan, A. Detecting and managing deterioration in children. *Paediatr. Nurs.* **17**, 32–35 (2005).
11. Parshuram, C. S., Hutchison, J. & Middaugh, K. Development and initial validation of the Bedside Paediatric Early Warning System score. *Crit. Care* **13**, R135–R135 (2009).
12. Haines, C., Perrott, M. & Weir, P. Promoting care for acutely ill children - Development and evaluation of a Paediatric Early Warning Tool. *Intensive Crit. Care Nurs.* **22**, 73–81 (2006).
13. Tibballs, J., Kinney, S., Duke, T., Oakley, E. & Hennessy, M. Reduction of paediatric in-patient cardiac arrest and death with a medical emergency team: preliminary results. *Arch. Dis. Child.* **90**, 1148–1152 (2005).
14. Mason, B. W., Edwards, E. D., Oliver, A. & Powell, C. V. E. Cohort study to test the predictability of the NHS Institute for Innovation and Improvement Paediatric Early Warning System. *Arch. Dis. Child.* archdischild-2015-308465 (2016). doi:10.1136/archdischild-2015-308465
15. Brill, R. J. *et al.* Implementation of a medical emergency team in a large pediatric teaching hospital prevents respiratory and cardiopulmonary arrests outside the intensive care unit. *Pediatric Critical Care Medicine* **8**, 236–246 (2007).
16. Hunt, E. A. *et al.* Transition from a traditional code team to a medical emergency team

- and categorization of cardiopulmonary arrests in a children's center. *Arch. Pediatr. Adolesc. Med.* **162**, 117–122 (2008).
17. Sharek, P. J. *et al.* Effect of a rapid response team on hospital-wide mortality and code rates outside the ICU in a Children's Hospital. *JAMA* **298**, 2267–2274 (2007).
  18. Anwar-Ul-Haque, Saleem, A. F., Zaidi, S. & Haider, S. R. Experience of pediatric rapid response team in a tertiary care hospital in Pakistan. *Indian J. Pediatr.* **77**, 273–276 (2010).
  19. Zhai, H. *et al.* Developing and evaluating a machine learning based algorithm to predict the need of pediatric intensive care unit transfer for newly hospitalized children. *Resuscitation* **85**, 1065–1071 (2014).
  20. Garlick, J. *et al.* Modified pediatric early warning scores, a predictor of appropriate transfer to higher level of care. *Crit. Care Med.* **41**, A166–A167 (2013).
  21. Medar, S., Weingarten-Arams, J. & Katyal, C. Pediatric early warning score (PEWS) is a reliable predictor of rapid response team (RRT) call. *Crit. Care Med.* **43**, 228 (2015).
  22. Bell, D. *et al.* The texas children's hospital pediatric advanced warning score as a predictor of clinical deterioration in hospitalized infants and children: A modification of the pews tool. *J. Pediatr. Nurs.* **28**, (2013).
  23. McLellan, M. C. & Connor, J. A. The Cardiac Children's Hospital Early Warning Score (C-CHEWS). *J. Pediatr. Nurs.* **28**, 171–178 (2013).
  24. Rahman, Z. H. *et al.* Application of the burn center Pediatric Early Warning Score (PEWS) tool to clinical practice: A pilot validation study. *J. Burn Care Res.* **35**, S187 (2014).
  25. Hopkins, M., Rowan, C., Rigby, M. & Tori, A. PEWS score predicts the need for PICU transfer and critical care interventions. *Crit. Care Med. Conference*, 43rd Critical Care Congress of the Society of Crit (2013).
  26. Gawronski, O. *et al.* Bedside pews in an Italian pediatric bone marrow transplant unit: Preliminary results of a longitudinal retrospective chart review. *Intensive Care Med.* **39**, S130 (2013).
  27. Sefton, G., Lane, S. & Carrol, E. D. Performance of individual predictors of deterioration used in a paediatric early warning score. *Pediatr. Crit. Care Med.* **15**, 29–30 (2014).
  28. Robson, M.-A. J., Cooper, C. L., Medicus, L. a, Quintero, M. J. & Zuniga, S. a. Comparison of three acute care pediatric early warning scoring tools. *J. Pediatr. Nurs.* **28**, e33–41 (2013).
  29. Chapman, S. M. *et al.* 'The Score Matters': wide variations in predictive performance of 18 paediatric track and trigger systems. *Arch. Dis. Child. archdischild*–2016–311088 (2017). doi:10.1136/archdischild-2016-311088
  30. Fuijkschot, J., Vernhout, B., Lemson, J., Draaisma, J. M. T. & Loeffen, J. L. C. M. Validation of a paediatric early warning score: First results and implications of usage. *Eur. J. Pediatr.* **174**, 15–21 (2015).
  31. Tucker, K. M., Brewer, T. L., Baker, R. B., Demeritt, B. & Vossmeier, M. T. Prospective evaluation of a pediatric inpatient early warning scoring system. *J. Spec. Pediatr. Nurs.* **14**, 79–85 (2009).

- 1
- 2
- 3 32. Edwards, E. D., Powell, C. V., Mason, B. W. & Oliver, A. Prospective cohort study to
- 4 test the predictability of the Cardiff and Vale paediatric early warning system. *Arch*
- 5 *Dis Child* **94**, 602–606 (2009).
- 6
- 7 33. Edwards, E. D., Mason, B. W., Oliver, A. & Powell, C. V. E. Cohort study to test the
- 8 predictability of the Melbourne criteria for activation of the medical emergency team.
- 9 *Arch. Dis. Child.* **96**, 174–179 (2011).
- 10
- 11 34. O’Loughlin, K. *et al.* The effectiveness of the paediatric early warning tool (PEWT) in
- 12 identifying children requiring admission to a critical care unit. *Arch. Dis. Child.* **97**,
- 13 A154 (2012).
- 14
- 15 35. Wright, D., Sefton, G. & Horan, M. Charted observations and the use of a paediatric
- 16 early warning tool did not predict the majority of cardio-respiratory arrest calls in a
- 17 paediatric hospital. *Arch. Dis. Child.* **96**, A59 (2011).
- 18
- 19 36. Ahmed, M. *et al.* Burton paediatric early warning system score. *Arch. Dis. Child.* **97**,
- 20 A421 (2012).
- 21
- 22 37. McLellan, M. C., Gauvreau, K. & Connor, J. A. Validation of the cardiac children’s
- 23 hospital early warning score: An early warning scoring tool to prevent
- 24 cardiopulmonary arrests in children with heart disease. *Congenit. Heart Dis.* **9**, 194–
- 25 202 (2014).
- 26
- 27 38. Clayson, R., Selby, A. & Tume, L. Is a paediatric early warning tool (PEWT) useful in
- 28 cardiac patients? *Pediatr. Crit. Care Med.* **15**, 35–36 (2014).
- 29
- 30 39. Fenix, J. B., Gillespie, C. W., Levin, A. & Dean, N. Comparison of Pediatric Early
- 31 Warning Score to Physician Opinion for Deteriorating Patients. *Hosp. Pediatr.* **5**, 474–
- 32 479 (2015).
- 33
- 34 40. Mandell, I. M. *et al.* Pediatric Early Warning Score and unplanned readmission to the
- 35 pediatric intensive care unit. *J. Crit. Care* **30**, 1090–1095 (2015).
- 36
- 37 41. A., A., P.W., F., N., S. & C., R.-G. Validation of a Pediatric Early Warning Score in
- 38 Hospitalized Pediatric Oncology and Hematopoietic Stem Cell Transplant Patients.
- 39 *Pediatr. Crit. Care Med.* **17**, e146–e153 (2016).
- 40
- 41 42. Agulnik, A. *et al.* Validation of a pediatric early warning system for hospitalized
- 42 pediatric oncology patients in a resource-limited setting. *Cancer* **123**, 4903–4913
- 43 (2017).
- 44
- 45 43. Blackstone, B., Sharmila, A., Pienaar, A., Bevan, R. & Cheung, R. G453(P) ‘Between
- 46 the flags’ paediatric early warning system is a sensitive tool to detect deterioration in
- 47 children from district general hospitals admitted to paediatric intensive care. *Arch. Dis.*
- 48 *Child.* **102**, A178 LP – A179 (2017).
- 49
- 50 44. Parshuram, C. S. *et al.* Multicentre validation of the bedside paediatric early warning
- 51 system score: a severity of illness score to detect evolving critical illness in
- 52 hospitalised children. *Crit Care* **15**, R184 (2011).
- 53
- 54 45. Akre, M. *et al.* Sensitivity of the pediatric early warning score to identify patient
- 55 deterioration. *Pediatrics* **125**, e763–9 (2010).
- 56
- 57 46. Gawronski, O. *et al.* Accuracy of Bedside Paediatric Early Warning System
- 58 (BedsidePEWS) in a Pediatric Stem Cell Transplant Unit. *J. Pediatr. Oncol. Nurs.* **33**,
- 59 249–256 (2016).
- 60
47. Duncan, H., Hutchison, J. & Parshuram, C. S. The pediatric early warning system
- score: A severity of illness score to predict urgent medical need in hospitalized

- 1  
2  
3 children. *J. Crit. Care* **21**, 271–278 (2006).
- 4 48. Skaletzky, S. M., Raszynski, A. & Totapally, B. R. Validation of a modified pediatric  
5 early warning system score: a retrospective case-control study. *Clin. Pediatr. (Phila)*.  
6 **51**, 431–5 (2012).
- 7  
8 49. Ross, C. *et al.* Sensitivity and specificity of a pediatric early warning system using  
9 data-driven vital signs. *Crit. Care Med.* **43**, 39 (2015).
- 10  
11 50. McLellan, M., Gauvreau, K. & Connor, J. A. Validation of the children’s hospital  
12 early warning scoring system for identifying hospitalized children at risk for arrest or  
13 ICU transfer. *Pediatr. Crit. Care Med.* **15**, 30 (2014).
- 14  
15 51. Mistry, K. P., Turi, J., Hueckel, R., Mericle, J. M. & Meliones, J. N. Pediatric Rapid  
16 Response Teams in the Academic Medical Center. *Clin. Pediatr. Emerg. Med.* **7**, 241–  
17 247 (2006).
- 18  
19 52. Demmel, K. M., Williams, L. & Flesch, L. Implementation of the pediatric early  
20 warning scoring system on a pediatric hematology/oncology unit. *J. Pediatr. Oncol.*  
21 *Nurs.* **27**, 229–240 (2010).
- 22  
23 53. Sandhu, S. *et al.* 726 The Paediatric Early Warning Tool in Combination with a Nurse-  
24 Led Outreach Team: Impact on Outcomes for Critically Ill Children. *Pediatr Res* **68**,  
25 368 (2010).
- 26  
27 54. Randhawa, S., Roberts-Turner, R., Woronick, K. & DuVal, J. Implementing and  
28 Sustaining Evidence-Based Nursing Practice to Reduce Pediatric Cardiopulmonary  
29 Arrest. *West. J. Nurs. Res.* **33**, 443–456 (2010).
- 30  
31 55. Camacho, E. A., Holman, D., Badgett, V., St. Peters, J. & Southworth, B. Modification  
32 of a Pediatric Early Warning Tool for Use With Patients in a Specialized  
33 Cardiac/Renal Unit. *J. Pediatr. Nurs.* **26**, e2–e3 (2011).
- 34  
35 56. Heyden, M. V., Mudge, B. & Casella, S. Initiation of a dedicated pediatric rapid  
36 response team reduces cardiopulmonary arrests outside of the intensive care unit in a  
37 small children’s hospital. *Crit. Care Med.* **40**, 147 (2012).
- 38  
39 57. Norville, R., Wills-Bagnato, P., Staton, S. & Kennedy-Nasser, A. Improvement in  
40 early recognition of deteriorating pediatric bone marrow transplant patients. *Biol.*  
41 *Blood Marrow Transplant.* **19**, S173 (2013).
- 42  
43 58. Ambati, S. R., Sweberg, T., Silver, P. & Gangadharan, S. Effect of simulation based  
44 curriculum on the utilization of rapid response team activations (RRT). *Crit. Care*  
45 *Med.* **42**, A1432 (2014).
- 46  
47 59. Ocholi, T., Downing, E., Rzeskiewicz, A., Pang, R. & Broughton, S. Impact of the  
48 Bedside PEWS on early detection of deteriorating patients. *Arch. Dis. Child.* **99**, A89–  
49 A90 (2014).
- 50  
51 60. Panesar, R. *et al.* Characteristics and outcomes of pediatric rapid response teams  
52 before and after mandatory triggering by an elevated Pediatric Early Warning System  
53 (PEWS) score. *Hosp. Pediatr.* **4**, 135–140 (2014).
- 54  
55 61. Kutty, S. *et al.* Association of Pediatric Medical Emergency Teams With Hospital  
56 Mortality. *Circulation* **137**, 38–46 (2018).
- 57  
58 62. Bonafide, C. P. *et al.* Impact of Rapid Response System Implementation on Critical  
59 Deterioration Events in Children. *JAMA Pediatr.* **168**, 25 (2014).
- 60  
61 63. Hanson, C. C. *et al.* A reduction in cardiac arrests and duration of clinical instability

- 1  
2  
3 after implementation of a paediatric rapid response system. *Postgrad. Med. J.* **86**, 314–  
4 318 (2010).
- 5  
6 64. Kotsakis, A. *et al.* Implementation of a multicenter rapid response system in pediatric  
7 academic hospitals is effective. *Pediatrics* **128**, 72–78 (2011).
- 8  
9 65. CS, P., Dryden-Palmer, K., Farrell, C. & al, et. Effect of a pediatric early warning  
10 system on all-cause mortality in hospitalized pediatric patients: The epoch randomized  
11 clinical trial. *JAMA* **319**, 1002–1012 (2018).
- 12  
13 66. Kolovos, N. S., Gill, J., Michelson, P. H., Doctor, A. & Hartman, M. E. Reduction in  
14 Mortality Following Pediatric Rapid Response Team Implementation. *Pediatr. Crit.*  
15 *Care Med.* **1** (2018). doi:10.1097/PCC.0000000000001519
- 16  
17 67. Tibballs, J. & Kinney, S. Reduction of hospital mortality and of preventable cardiac  
18 arrest and death on introduction of a pediatric medical emergency team. *Pediatr. Crit.*  
19 *Care Med.* **10**, 306–312 (2009).
- 20  
21 68. Zenker, P. *et al.* Implementation and impact of a rapid response team in a children’s  
22 hospital. *Jt. Comm. J. Qual. Patient Saf.* **33**, 418–425 (2007).
- 23  
24 69. Sefton, G. *et al.* What impact did a Paediatric Early Warning system have on  
25 emergency admissions to the paediatric intensive care unit? An observational cohort  
26 study. *Intensive Crit. care Nurs.* **31**, 91–99 (2015).
- 27  
28 70. Parshuram, C. S., Bayliss, A., Reimer, J., Middaugh, K. & Blanchard, N.  
29 Implementing the Bedside Paediatric Early Warning System in a community hospital:  
30 A prospective observational study. *Paediatr. Child Health* **16**, e18–22 (2011).
- 31  
32 71. Agulnik, A. *et al.* Improved outcomes after successful implementation of a pediatric  
33 early warning system (PEWS) in a resource-limited pediatric oncology hospital.  
34 *Cancer* **123**, 2965–2974 (2017).
- 35  
36 72. Douglas, K., Collado, J. C. & Keller, S. Implementation of a Pediatric Early Warning  
37 Scoring System at an Academic Medical Center. *Crit. Care Nurs. Q.* **39**, 363–370  
38 (2016).
- 39  
40 73. Duns, N. *et al.* Introduction of a track and trigger system is associated with increased  
41 paediatric intensive care outreach utilisation and a trend towards improved patient  
42 outcomes in a tertiary children’s hospital. *Aust. Crit. Care* **27**, 61 (2014).
- 43  
44 74. Chapman, S. M. *et al.* ‘The Score Matters’: Wide variations in predictive performance  
45 of 18 paediatric track and trigger systems. *Arch. Dis. Child.* **102**, 487–495 (2017).
- 46  
47 75. Guerra, M. W., Shults, J., Amsterdam, J. & Ten-Have, T. The analysis of binary  
48 longitudinal data with time-dependent covariates. *Stat. Med.* **31**, 931–948 (2012).
- 49  
50 76. Selig, J. P., Preacher, K. J. & Little, T. D. Modeling Time-Dependent Association in  
51 Longitudinal Data: A Lag as Moderator Approach. *Multivariate Behav. Res.* **47**, 697–  
52 716 (2012).
- 53  
54 77. Clifton, D. A. *et al.* ‘Errors’ and omissions in paper-based early warning scores: the  
55 association with changes in vital signs—a database analysis. *BMJ Open* **5**, e007376  
56 (2015).
- 57  
58 78. Joffe, A. R., Anton, N. R. & Burkholder, S. C. Reduction in hospital mortality over  
59 time in a hospital without a pediatric medical emergency team: limitations of before-  
60 and-after study designs. *Arch. Pediatr. Adolesc. Med.* **165**, 419–423 (2011).
79. Goodacre, S. Uncontrolled before-after studies: Discouraged by Cochrane and the



- 1  
2  
3 EMJ. *Emergency Medicine Journal* **32**, 507–508 (2015).
- 4 80. Niegsch, M., Fabritius, M. L. & Anh??j, J. Imperfect Implementation of an Early  
5 Warning Scoring System in a Danish Teaching Hospital: A Cross-Sectional Study.  
6 *PLoS One* **8**, (2013).
- 7  
8 81. Hands, C. *et al.* Patterns in the recording of vital signs and early warning scores:  
9 Compliance with a clinical escalation protocol. *BMJ Qual. Saf.* **22**, 719–726 (2013).
- 10  
11 82. Lydon, S., Byrne, D., Offiah, G. & Gleeson, L. A mixed-methods investigation of  
12 health professionals' perceptions of a physiological track and trigger system. *BMJ*  
13 *Qual.* 688–695 (2015). doi:10.1136/bmjqs-2015-004261
- 14  
15 83. Bonafide, C. P. *et al.* Beyond statistical prediction: Qualitative evaluation of the  
16 mechanisms by which paediatric early warning scores impact patient safety. *J. Hosp.*  
17 *Med.* **8**, 248–253 (2013).
- 18  
19 84. Ennis, L. Paediatric early warning scores on a children's ward: a quality improvement  
20 initiative. *Nurs. Child. Young People* **26**, 25–31 (2014).
- 21  
22 85. Kaul, M. *et al.* Implementation of the Bedside Paediatric Early Warning System  
23 (BedsidePEWS) for nurse identification of deteriorating patients. *J. Spec. Pediatr.*  
24 *Nurs.* **19**, 339–349 (2014).
- 25  
26 86. Monaghan, A. Detecting and managing deterioration in children. *Paediatr. Care* **17**,  
27 32–35 (2005).
- 28  
29  
30  
31  
32  
33  
34  
35  
36  
37  
38  
39  
40  
41  
42  
43  
44  
45  
46  
47  
48  
49  
50  
51  
52  
53  
54  
55  
56  
57  
58  
59  
60

**Table 2– summary of PTTTs**

| PTTT name                                    | Refs (first author, year)                              | Development / modification details                                                                                                                                                                                                                                                                                                                                                                                                                                                                                                                                      | Score / trigger | Thresh olds based on | Age-dependent thresholds? | No. of items in the tool* | Underlying components |            |                               |                                    |                   |                       |                |                         |      |               |             |                                  |             |        | Other items |                                                                                                                                                                                                                          |
|----------------------------------------------|--------------------------------------------------------|-------------------------------------------------------------------------------------------------------------------------------------------------------------------------------------------------------------------------------------------------------------------------------------------------------------------------------------------------------------------------------------------------------------------------------------------------------------------------------------------------------------------------------------------------------------------------|-----------------|----------------------|---------------------------|---------------------------|-----------------------|------------|-------------------------------|------------------------------------|-------------------|-----------------------|----------------|-------------------------|------|---------------|-------------|----------------------------------|-------------|--------|-------------|--------------------------------------------------------------------------------------------------------------------------------------------------------------------------------------------------------------------------|
|                                              |                                                        |                                                                                                                                                                                                                                                                                                                                                                                                                                                                                                                                                                         |                 |                      |                           |                           | Respiratory rate      | Heart rate | Respiratory effort / distress | Level of consciousness / behaviour | Oxygen saturation | Capillary refill time | Oxygen therapy | Systolic blood pressure | Pain | Staff concern | Skin colour | Airway obstruction / abnormality | Temperature | Pulses |             | Family concern                                                                                                                                                                                                           |
| Paediatric Early Warning System (PEWS) score | Duncan 2006 <sup>47</sup><br>Robson 2013 <sup>28</sup> | Initial development by Duncan <i>et al.</i> for use in Canadian tertiary centre.<br><br>47 candidate items generated by focus groups with nurses; 22 items removed by separate focus group and consensus / Delphi methods with nursing and clinical staff; evaluated remaining items using a clinical dataset of cases (code blue call, n=87) and controls (n=128) – 4 items removed due to insufficient data, 5 removed due to poor discriminatory ability. 16 items remained (9 static items, 7 dynamic).<br><br>Development and validation datasets not independent. | Score           | Expert opinion       | Yes                       | 16                        | ✓                     | ✓          |                               | ✓                                  | ✓                 | ✓                     | ✓              |                         |      |               |             | ✓                                | ✓           | ✓      |             | Bolus fluid, medications, home oxygen, any previous admission to an ICU, central venous line in situ, transplant recipient, severe cerebral palsy, gastrostomy tube, greater than 3 medical specialties involved in care |



1  
2  
3  
4  
5  
6  
7  
8  
9  
10  
11  
12  
13  
14  
15  
16  
17  
18  
19  
20  
21  
22  
23  
24  
25  
26  
27  
28  
29  
30  
31  
32  
33  
34  
35  
36  
37  
38  
39  
40  
41  
42  
43  
44  
45  
46  
47

|                                                      |                                                                                                                                                                                                                                                                                                                                                          |                                                                                                                                                                                                                                                                                                                                                                                                                                                                                                                                                                             |              |                            |            |          |          |          |          |  |          |          |          |          |  |  |  |  |  |  |  |
|------------------------------------------------------|----------------------------------------------------------------------------------------------------------------------------------------------------------------------------------------------------------------------------------------------------------------------------------------------------------------------------------------------------------|-----------------------------------------------------------------------------------------------------------------------------------------------------------------------------------------------------------------------------------------------------------------------------------------------------------------------------------------------------------------------------------------------------------------------------------------------------------------------------------------------------------------------------------------------------------------------------|--------------|----------------------------|------------|----------|----------|----------|----------|--|----------|----------|----------|----------|--|--|--|--|--|--|--|
| <p>Bedside Paediatric Early Warning Score (PEWS)</p> | <p>Parshuram 2009<sup>11</sup><br/>Parshuram 2011<sup>44</sup><br/>Parshuram 2011<sup>70+</sup><br/>Robson 2013<sup>28</sup><br/>Hopkins 2013<sup>25</sup><br/>Gawronski 2013<sup>26</sup><br/>Bonafide 2014<sup>62+</sup><br/>Zhai 2014<sup>19</sup><br/>Ocholi 2014<sup>59+</sup><br/>Gawronski 2016<sup>46</sup><br/>Parshuram 2018<sup>65+</sup></p> | <p>Initial development by Parshuram <i>et al.</i> for use in US tertiary centre.<br/><br/>11 candidate items (all dynamic) identified based on inclusion in routine clinical assessment at local setting; discriminatory ability of individual items assessed using clinical dataset of cases (PICU admission, n=60) and controls (n=120) , 3 items removed and 3 candidate scores (using combinations of remaining 8 items) evaluated on same clinical dataset. Evaluation lead to selection of 7 item score.<br/><br/>Development and validation set not independent.</p> | <p>Score</p> | <p>Expert opinion</p>      | <p>Yes</p> | <p>7</p> | <p>✓</p> | <p>✓</p> | <p>✓</p> |  | <p>✓</p> | <p>✓</p> | <p>✓</p> |          |  |  |  |  |  |  |  |
| <p>Modified Bedside PEWS (a)</p>                     | <p>Fuijkschot 2015<sup>30</sup></p>                                                                                                                                                                                                                                                                                                                      | <p>Modification to Bedside PEWS for use in Dutch tertiary centre.<br/><br/>Added temperature; modified wording of respiratory effort and oxygen therapy items</p>                                                                                                                                                                                                                                                                                                                                                                                                           | <p>Score</p> | <p>Expert opinion</p>      | <p>Yes</p> | <p>8</p> | <p>✓</p> | <p>✓</p> | <p>✓</p> |  | <p>✓</p> | <p>✓</p> | <p>✓</p> | <p>✓</p> |  |  |  |  |  |  |  |
| <p>Modified Bedside PEWS (b)</p>                     | <p>Ross 2015<sup>49</sup></p>                                                                                                                                                                                                                                                                                                                            | <p>Modification to Bedside PEWS for use in US tertiary centre.<br/><br/>Changed normal</p>                                                                                                                                                                                                                                                                                                                                                                                                                                                                                  | <p>Score</p> | <p>Data driven (HR and</p> | <p>Yes</p> | <p>7</p> | <p>✓</p> | <p>✓</p> | <p>✓</p> |  | <p>✓</p> | <p>✓</p> | <p>✓</p> | <p>✓</p> |  |  |  |  |  |  |  |

1  
2  
3  
4  
5  
6  
7  
8  
9  
10  
11  
12  
13  
14  
15  
16  
17  
18  
19  
20  
21  
22  
23  
24  
25  
26  
27  
28  
29  
30  
31  
32  
33  
34  
35  
36  
37  
38  
39  
40  
41  
42  
43  
44  
45  
46  
47

|                            |                                                                                  |                                                                                                                                                                                                                                                                                                                                                                                                                                                                                                    |       |                |     |   |   |   |   |   |  |   |   |  |  |  |  |  |  |                                                       |
|----------------------------|----------------------------------------------------------------------------------|----------------------------------------------------------------------------------------------------------------------------------------------------------------------------------------------------------------------------------------------------------------------------------------------------------------------------------------------------------------------------------------------------------------------------------------------------------------------------------------------------|-------|----------------|-----|---|---|---|---|---|--|---|---|--|--|--|--|--|--|-------------------------------------------------------|
|                            |                                                                                  | thresholds for HR and RR based on analysis of local clinical data.                                                                                                                                                                                                                                                                                                                                                                                                                                 |       | RR)            |     |   |   |   |   |   |  |   |   |  |  |  |  |  |  |                                                       |
| Brighton PEWS              | Monaghan 2005 <sup>86</sup><br>Randhawa 2010 <sup>54†</sup>                      | Initial development by Monaghan <i>et al.</i> for use in UK tertiary centre.<br><br>Based on existing adult scores, but with some items (e.g. blood pressure) removed due to local consensus and some non-vital sign items added to reduce need to develop multiple age-adjusted charts. Persistent vomiting added and tachycardia added as scoring items after pilot implementation.<br><br>Initial audit of 30 patients who had scored at least 4 on the tool – little statistical detail given. | Score | Expert opinion | No  | 3 | ✓ | ✓ | ✓ | ✓ |  | ✓ | ✓ |  |  |  |  |  |  | ¼ hourly nebulisers, persistent vomiting post-surgery |
| Modified Brighton PEWS (a) | Tucker 2008 <sup>31</sup><br>Zhai 2014 <sup>19</sup><br>Fenix 2015 <sup>39</sup> | Modification of Brighton PEWS by Tucker <i>et al.</i> for use in general medical ward of a US tertiary centre.<br><br>Altered thresholds for oxygen therapy; changed wording for respiratory effort; modified escalation algorithm.                                                                                                                                                                                                                                                                | Score | Expert opinion | No  | 3 | ✓ | ✓ | ✓ | ✓ |  | ✓ | ✓ |  |  |  |  |  |  | ¼ hourly nebulisers, persistent vomiting post-surgery |
| Modified Brighton PEWS (b) | Akre 2010 <sup>45</sup><br>Douglas 2016 <sup>72†</sup>                           | Modification of Brighton PEWS by Akre <i>et al.</i> for use in US tertiary centre.<br><br>Added age-dependent                                                                                                                                                                                                                                                                                                                                                                                      | Score | Expert opinion | Yes | 3 | ✓ | ✓ | ✓ | ✓ |  | ✓ | ✓ |  |  |  |  |  |  | ¼ hourly nebulisers, persistent vomiting post-        |



1  
2  
3  
4  
5  
6  
7  
8  
9  
10  
11  
12  
13  
14  
15  
16  
17  
18  
19  
20  
21  
22  
23  
24  
25  
26  
27  
28  
29  
30  
31  
32  
33  
34  
35  
36  
37  
38  
39  
40  
41  
42  
43  
44  
45  
46  
47

|                                                           |                                                                                                    |                                                                                                                                                                                                                                                                                                                          |       |                |     |   |   |   |   |   |   |   |   |   |   |   |  |  |  |  |                                                                  |
|-----------------------------------------------------------|----------------------------------------------------------------------------------------------------|--------------------------------------------------------------------------------------------------------------------------------------------------------------------------------------------------------------------------------------------------------------------------------------------------------------------------|-------|----------------|-----|---|---|---|---|---|---|---|---|---|---|---|--|--|--|--|------------------------------------------------------------------|
|                                                           |                                                                                                    | No formal validation study reported in the literature.                                                                                                                                                                                                                                                                   |       |                |     |   |   |   |   |   |   |   |   |   |   |   |  |  |  |  |                                                                  |
| Texas Children's Hospital (TCH) PAWS                      | Bell 2013 <sup>22</sup>                                                                            | Modification of Brighton PEWS for use in a US tertiary centre.<br><br>Modified wording of Behaviour component; added oxygen saturations to Respiratory component; added diaphoresis to Cardiovascular component; changed ¼ hourly nebulisers to hourly; changed oxygen therapy thresholds; modified escalation algorithm | Score | Expert opinion | No  | 3 | ✓ | ✓ | ✓ | ✓ | ✓ | ✓ | ✓ |   |   |   |  |  |  |  | Hourly respiratory treatment s; persistent vomiting post-surgery |
| Children's Hospital Early Warning Score (CHEWS)           | McLellan 2014 <sup>50</sup>                                                                        | Modification of Brighton PEWS for use in a US tertiary centre.<br><br>Altered thresholds for oxygen therapy; changed wording for Behaviour and Respiratory components; added staff concern and family concern; removed nebulisers and persistent vomiting items; modified escalation algorithm                           | Score | Expert opinion | No  | 5 | ✓ | ✓ | ✓ | ✓ | ✓ | ✓ | ✓ |   |   |   |  |  |  |  | ✓                                                                |
| Children's Hospital Cardiac Early Warning Score (C-CHEWS) | McLellan 2013 <sup>23</sup><br>Agulnik 2016 <sup>41</sup><br>Agulnik 2017 <sup>42</sup><br>Agulnik | Modification of Brighton PEWS by McLellan <i>et al.</i> , for use in a cardiac ward of a US tertiary centre.<br><br>Altered thresholds for oxygen therapy; added multiple items to Behaviour, Respiratory and                                                                                                            | Score | Expert opinion | Yes | 5 | ✓ | ✓ | ✓ | ✓ | ✓ | ✓ | ✓ | ✓ | ✓ | ✓ |  |  |  |  | ✓                                                                |

1  
2  
3  
4  
5  
6  
7  
8  
9  
10  
11  
12  
13  
14  
15  
16  
17  
18  
19  
20  
21  
22  
23  
24  
25  
26  
27  
28  
29  
30  
31  
32  
33  
34  
35  
36  
37  
38  
39  
40  
41  
42  
43  
44  
45  
46  
47

|                                             |                                                                                                   |                                                                                                                                                                                                                                                                 |         |                |     |   |   |   |   |   |   |   |   |   |   |   |   |   |   |   |                                                                                                                  |
|---------------------------------------------|---------------------------------------------------------------------------------------------------|-----------------------------------------------------------------------------------------------------------------------------------------------------------------------------------------------------------------------------------------------------------------|---------|----------------|-----|---|---|---|---|---|---|---|---|---|---|---|---|---|---|---|------------------------------------------------------------------------------------------------------------------|
|                                             | 2017 <sup>71+</sup>                                                                               | Cardiovascular components; added family and staff concern; added age-dependent thresholds; removed nebulisers and persistent vomiting items; changed required actions according to certain scoring cut-offs.                                                    |         |                |     |   |   |   |   |   |   |   |   |   |   |   |   |   |   |   |                                                                                                                  |
| Burn-specific PEWS                          | Rahman 2014 <sup>24</sup>                                                                         | Modification of Brighton PEWS, for use in a specialist Burn Centre of a US tertiary centre.<br><br>Added temperature; added intake and output scoring items; added Skin component                                                                               | Score   | Expert opinion | No  | 6 | ✓ | ✓ | ✓ | ✓ | ✓ | ✓ | ✓ | ✓ | ✓ | ✓ | ✓ | ✓ | ✓ | ✓ | Intake; outputs; skin                                                                                            |
| Children's Hospital Los Angeles (CHLA) PEWS | Mandell 2015 <sup>40</sup>                                                                        | Modification of Brighton PEWS for use in a US tertiary centre.<br><br>Added medical history as scoring item; added single ventricle physiology as scoring item; changed thresholds for oxygen therapy; added any assisted ventilation to Respiratory component. | Score   | Expert opinion |     | 4 | ✓ | ✓ | ✓ | ✓ | ✓ | ✓ | ✓ | ✓ | ✓ | ✓ | ✓ | ✓ | ✓ | ✓ | RRT, code blue, or transfer from/to PICU in past 2 weeks; single ventricle physiology ; any assisted ventilation |
| Melbourne Activation Criteria (MAC)         | Tibballs 2005 <sup>13+</sup><br>Tume 2007 <sup>3</sup><br>Tibballs 2009 <sup>67+</sup><br>Edwards | Initial development by Tibballs <i>et al.</i> , for use in an Australian tertiary centre to activate a MET.<br><br>"The pediatric MET calling criteria were adapted from adult MET calling criteria with the addition of age-                                   | Trigger | Expert opinion | Yes | 9 | ✓ | ✓ | ✓ | ✓ | ✓ | ✓ | ✓ | ✓ | ✓ | ✓ | ✓ | ✓ | ✓ | ✓ | Cardiac or respiratory arrest                                                                                    |

1  
2  
3  
4  
5  
6  
7  
8  
9  
10  
11  
12  
13  
14  
15  
16  
17  
18  
19  
20  
21  
22  
23  
24  
25  
26  
27  
28  
29  
30  
31  
32  
33  
34  
35  
36  
37  
38  
39  
40  
41  
42  
43  
44  
45  
46  
47

|                                                         |                                                                                                                                                                |                                                                                                                                                                                                                                                                                                               |         |                |     |    |   |   |   |   |   |   |   |   |   |   |  |  |  |                                                                                                           |
|---------------------------------------------------------|----------------------------------------------------------------------------------------------------------------------------------------------------------------|---------------------------------------------------------------------------------------------------------------------------------------------------------------------------------------------------------------------------------------------------------------------------------------------------------------|---------|----------------|-----|----|---|---|---|---|---|---|---|---|---|---|--|--|--|-----------------------------------------------------------------------------------------------------------|
|                                                         | 2011 <sup>33</sup>                                                                                                                                             | related abnormal recordings of heart rate, respiratory rate, and blood pressure" (Tibballs 2009).<br><br>No formal validation reported by Tibballs <i>et al.</i>                                                                                                                                              |         |                |     |    |   |   |   |   |   |   |   |   |   |   |  |  |  |                                                                                                           |
| Modified MAC                                            | Kotsakis 2011 <sup>64†</sup>                                                                                                                                   | Modification of MAC for use in a Canadian tertiary centre, to activate a RRS.<br><br>Removed cardiac / respiratory arrest outcome.<br><br>No formal validation reported in the literature.                                                                                                                    | Trigger | Expert opinion | Yes | 8  | ✓ | ✓ | ✓ | ✓ | ✓ |   | ✓ | ✓ | ✓ |   |  |  |  |                                                                                                           |
| Cardiff & Vale Paediatric Early Warning Score (C&VPEWS) | Edwards 2009 <sup>32</sup><br><br>Edwards 2011 <sup>33</sup>                                                                                                   | Modification of MAC for evaluation in a UK tertiary centre.<br><br>Removed cardiac / respiratory arrest outcome; altered thresholds of some items; evaluated as aggregate score rather than single-item trigger.                                                                                              | Score   | Expert opinion | Yes | 8  | ✓ | ✓ | ✓ | ✓ | ✓ |   | ✓ | ✓ | ✓ |   |  |  |  |                                                                                                           |
| Bristol Paediatric Early Warning Tool (PEWT)            | Haines 2006 <sup>12</sup><br><br>Tume 2007 <sup>3</sup><br><br>Wright 2011 <sup>35</sup><br><br>O'Loughlin 2012 <sup>34</sup><br><br>Robson 2013 <sup>28</sup> | Initial development by Haines <i>et al.</i> for use in a UK tertiary centre.<br><br>Candidate items generated by reference to an un-validated tool developed in Plymouth, "with modifications from criteria developed at Melbourne Children's Hospital and similar adult systems" and expert opinion of local | Trigger | APLS values    | Yes | 14 | ✓ | ✓ |   | ✓ | ✓ | ✓ | ✓ | ✓ | ✓ | ✓ |  |  |  | Required nebulised adrenaline ; hyperkalaemia; suspected meningococcus; diabetic ketoacidosis; persistent |



1  
2  
3  
4  
5  
6  
7  
8  
9  
10  
11  
12  
13  
14  
15  
16  
17  
18  
19  
20  
21  
22  
23  
24  
25  
26  
27  
28  
29  
30  
31  
32  
33  
34  
35  
36  
37  
38  
39  
40  
41  
42  
43  
44  
45  
46  
47

|                                                                  |                            |                                                                                                                                                                                                                                                                                                                                                                                                |         |                                                               |     |    |   |   |   |   |   |   |   |   |   |   |   |   |   |   |   |                                  |                                                                                                                                 |
|------------------------------------------------------------------|----------------------------|------------------------------------------------------------------------------------------------------------------------------------------------------------------------------------------------------------------------------------------------------------------------------------------------------------------------------------------------------------------------------------------------|---------|---------------------------------------------------------------|-----|----|---|---|---|---|---|---|---|---|---|---|---|---|---|---|---|----------------------------------|---------------------------------------------------------------------------------------------------------------------------------|
| Modified Bristol PEWT (b)                                        | Clayson 2014 <sup>38</sup> | <p>Modification of Bristol PEWT for use in a cardiac ward of a UK tertiary centre.</p> <p>Amended HR and RR thresholds. Adjusted wording of Airway parameters; added effort of breathing and respiratory depression parameters; allowed for AVPU evaluation in addition to GCS; removed suspected meningococcus and diabetic ketoacidosis; added pH&lt;7.2 and unresolved pain parameters.</p> | Trigger | HR and RR thresholds changed to evidence-based centile charts | Yes | 14 | ✓ | ✓ | ✓ | ✓ | ✓ | ✓ | ✓ | ✓ | ✓ | ✓ | ✓ | ✓ | ✓ | ✓ | ✓ | ✓                                | Required nebulised adrenaline or no improvement after nebulisers; pH<7.2; unresolved pain or current analgesic therapy; fitting |
| NHS Institute for Innovation and Improvement (NHS III) PEWS      | Mason 2016 <sup>14</sup>   | <p>Designed as part of a NHS Institute fellowship project. Adapted from adult scores and Brighton PEWS.</p> <p>No formal development or internal validation study published.</p>                                                                                                                                                                                                               | Score   | APLS values                                                   | Yes | 6  | ✓ | ✓ | ✓ | ✓ | ✓ | ✓ | ✓ | ✓ | ✓ | ✓ | ✓ | ✓ | ✓ | ✓ | ✓ |                                  |                                                                                                                                 |
| Paediatric Medical Emergency Team (PMET) triggering criteria (a) | Brilli 2007 <sup>15+</sup> | <p>Initial development by Brilli <i>et al.</i>, for use in a US tertiary centre to activate a MET.</p> <p>Retrospective chart review of patients requiring code call non-ICU areas (n=44) used to generate 10 most commonly recorded variables in preceding 4 hours before event.</p> <p>Several combinations of</p>                                                                           | Trigger | Expert opinion                                                | No  | 4  |   |   | ✓ | ✓ | ✓ |   |   |   |   |   |   |   |   |   | ✓ | Worsening retractions ; cyanosis |                                                                                                                                 |



1  
2  
3  
4  
5  
6  
7  
8  
9  
10  
11  
12  
13  
14  
15  
16  
17  
18  
19  
20  
21  
22  
23  
24  
25  
26  
27  
28  
29  
30  
31  
32  
33  
34  
35  
36  
37  
38  
39  
40  
41  
42  
43  
44  
45  
46  
47

|                                                                  |                            |                                                                                                                                                                                                                                                                                                                                                                                                                                                                                                       |         |                |         |    |   |   |   |   |   |  |  |   |   |  |  |  |   |                                                                                                                        |
|------------------------------------------------------------------|----------------------------|-------------------------------------------------------------------------------------------------------------------------------------------------------------------------------------------------------------------------------------------------------------------------------------------------------------------------------------------------------------------------------------------------------------------------------------------------------------------------------------------------------|---------|----------------|---------|----|---|---|---|---|---|--|--|---|---|--|--|--|---|------------------------------------------------------------------------------------------------------------------------|
|                                                                  |                            | variables ("trigger sets") evaluated against case data – eventual triggers selected based on "the clinical judgment of experts, balancing each trigger set's calculated rank against the ease of measure and detection, anticipated false alarm rate, and practical considerations regarding their effective use by hospital staff"<br><br>No formal validation of final tool reported.                                                                                                               |         |                |         |    |   |   |   |   |   |  |  |   |   |  |  |  |   |                                                                                                                        |
| Paediatric Medical Emergency Team (PMET) triggering criteria (b) | Hunt 2008 <sup>16+</sup>   | Initial development by Hunt <i>et al.</i> , for use in a US tertiary centre to activate a MET.<br><br>Minimal description of tool development. Authors explain that they "deliberately created broad criteria to encourage calls and described categories of illness rather than using specific vital sign parameters, because the wards had children of varying ages and no single set of vital sign parameters would be appropriate".<br><br>No formal validation study reported in the literature. | Trigger | Expert opinion | Unclear | 12 | ✓ | ✓ | ✓ | ✓ | ✓ |  |  |   |   |  |  |  | ✓ | Cardiac or respiratory arrest; seizures with apnoea; progressive lethargy; circulatory compromise/acute shock syndrome |
| Paediatric Rapid                                                 | Sharek 2007 <sup>17+</sup> | Initial development by Sharek <i>et al.</i> for use in a                                                                                                                                                                                                                                                                                                                                                                                                                                              | Trigger | Expert opinion | No      | 6  | ✓ | ✓ |   | ✓ | ✓ |  |  | ✓ | ✓ |  |  |  |   |                                                                                                                        |

1  
2  
3  
4  
5  
6  
7  
8  
9  
10  
11  
12  
13  
14  
15  
16  
17  
18  
19  
20  
21  
22  
23  
24  
25  
26  
27  
28  
29  
30  
31  
32  
33  
34  
35  
36  
37  
38  
39  
40  
41  
42  
43  
44  
45  
46  
47

|                                                               |                                      |                                                                                                                                                                                                                                                                                                                                                                                                                           |         |                |     |    |   |   |   |   |   |   |   |   |  |  |  |  |   |                                                                |
|---------------------------------------------------------------|--------------------------------------|---------------------------------------------------------------------------------------------------------------------------------------------------------------------------------------------------------------------------------------------------------------------------------------------------------------------------------------------------------------------------------------------------------------------------|---------|----------------|-----|----|---|---|---|---|---|---|---|---|--|--|--|--|---|----------------------------------------------------------------|
| Response Team (PRRT) triggering criteria (a)                  |                                      | US tertiary centre, to activate a RRT.<br><br>Triggering items elected through expert consensus locally – reference to similarity to Melbourne Activation Criteria and PMET triggering criteria (a).<br><br>No formal validation study reported in the literature.                                                                                                                                                        |         |                |     |    |   |   |   |   |   |   |   |   |  |  |  |  |   |                                                                |
| Paediatric Rapid Response Team (PRRT) triggering criteria (b) | Anwar-al-Haque, 2010 <sup>18</sup> † | Initial description by Anwar-al-Haque <i>et al.</i> , for use in calling RRT team in a tertiary centre in Pakistan.<br><br>Minimal explanation for selection of calling criteria. No formal validation study reported in the literature.                                                                                                                                                                                  | Trigger | Unclear        | Yes | 8  | ✓ | ✓ | ✓ | ✓ | ✓ |   | ✓ | ✓ |  |  |  |  |   | Convulsion                                                     |
| Logistic regression algorithm                                 | Zhai 2014 <sup>19</sup>              | Development of an algorithm tool, based on a data mining exercise of a large, electronic health record dataset in the authors’ US-based tertiary centre.<br><br>Extracted 24 hours of clinical data from children transferred to PICU within 24hrs of admission (n=526) and controls not transferred to PICU (n=6,722).<br><br>Identified 400 most commonly recorded clinical elements in health records, and then expert | Score   | Expert opinion | Yes | 29 | ✓ | ✓ | ✓ | ✓ | ✓ | ✓ | ✓ | ✓ |  |  |  |  | ✓ | Acuity level (local measure); tissue perfusion and oxygenation |

1  
2  
3  
4  
5  
6  
7  
8  
9  
10  
11  
12  
13  
14  
15  
16  
17  
18  
19  
20  
21  
22  
23  
24  
25  
26  
27  
28  
29  
30  
31  
32  
33  
34  
35  
36  
37  
38  
39  
40  
41  
42  
43  
44  
45  
46  
47

|                                                                                                                                                                                                                                                                                                                                                                                                                                                                                                                                                                                                |  |                                                                                                                                                                                                                                                                                                                                                                                                                                                                                          |  |  |  |  |  |  |  |  |  |  |  |  |  |  |  |  |  |  |  |
|------------------------------------------------------------------------------------------------------------------------------------------------------------------------------------------------------------------------------------------------------------------------------------------------------------------------------------------------------------------------------------------------------------------------------------------------------------------------------------------------------------------------------------------------------------------------------------------------|--|------------------------------------------------------------------------------------------------------------------------------------------------------------------------------------------------------------------------------------------------------------------------------------------------------------------------------------------------------------------------------------------------------------------------------------------------------------------------------------------|--|--|--|--|--|--|--|--|--|--|--|--|--|--|--|--|--|--|--|
|                                                                                                                                                                                                                                                                                                                                                                                                                                                                                                                                                                                                |  | <p>consensus used to select 16 most useful clinical parameters. Created 36 variables from these 16 parameters, including maximum, minimum and mean values for some parameters over the 24hr period.</p> <p>Developed a logistic regression model using 36 items, on a subset of the cases (n=473) and controls (n=473). Decided to retain 29 items (relating to 13 clinical parameters) in the final model. Final model was tested on remaining cases (n=53) and controls (n=6,299).</p> |  |  |  |  |  |  |  |  |  |  |  |  |  |  |  |  |  |  |  |
| <p>* Multiple parameters are often required to be collected for each scoring item/category, e.g., scoring the 'Cardiovascular' category in the Brighton PEWS requires collection / evaluation of heart rate, skin colour and capillary refill time</p> <p>† Denotes a study included in the effectiveness review</p> <p>PTTS: Paediatric Track and Trigger Tool; PICU: Paediatric Intensive Care Unit; PHDU: Paediatric High-Dependency Unit; HR: Heart rate; RR: Respiratory rate; APLS: Advanced Paediatric Life Support; AVPU: Alert, Voice, Pain, Responsive ; GCS: Glasgow Coma Scale</p> |  |                                                                                                                                                                                                                                                                                                                                                                                                                                                                                          |  |  |  |  |  |  |  |  |  |  |  |  |  |  |  |  |  |  |  |

**Table 3 – summary of PTTT validation study outcomes**

| PTTT                                         | Ref (first author, year)  | Country | Study population | Study design                       | Number of centres | PTTT used in practice? | Internal / external validation study? | Outcome measures                                              | Sample size    | Score or trigger? | Score tested / maximum score | Which score used (frequency of scoring)?* | AUROC | Sensitivity | Specificity | PPV  | NPV | Notes on accuracy / reliability of scoring and missing data                                                                                                                                                                                                                | Quality score (max = 24) |
|----------------------------------------------|---------------------------|---------|------------------|------------------------------------|-------------------|------------------------|---------------------------------------|---------------------------------------------------------------|----------------|-------------------|------------------------------|-------------------------------------------|-------|-------------|-------------|------|-----|----------------------------------------------------------------------------------------------------------------------------------------------------------------------------------------------------------------------------------------------------------------------------|--------------------------|
| Paediatric Early Warning System (PEWS) score | Duncan 2006 <sup>47</sup> | Canada  | All in-patients  | Case-control study (retrospective) | 1                 | No                     | Int                                   | Code blue call for actual or impending cardiopulmonary arrest | 215 (87 cases) | S                 | 5 / 26                       | Max 24hrs before event (hourly)           | 0.90  | 78.0        | 95.0        | 4.2† |     | No details on data abstraction.<br><br>Data for four items from the tool could not be reliably abstracted and were excluded from analysis. 13% of eligible cases and 84% of eligible controls excluded due to incomplete clinical data. Missing data assumed to be normal. | 14                       |

1  
2  
3  
4  
5  
6  
7  
8  
9  
10  
11  
12  
13  
14  
15  
16  
17  
18  
19  
20  
21  
22  
23  
24  
25  
26  
27  
28  
29  
30  
31  
32  
33  
34  
35  
36  
37  
38  
39  
40  
41  
42  
43  
44  
45  
46  
47

|              |                              |        |                 |                                    |   |    |     |                                               |                 |   |        |                                             |      |      |      |      |                                                                                                                                                                                                                        |                                                                                                                                                                                                         |    |
|--------------|------------------------------|--------|-----------------|------------------------------------|---|----|-----|-----------------------------------------------|-----------------|---|--------|---------------------------------------------|------|------|------|------|------------------------------------------------------------------------------------------------------------------------------------------------------------------------------------------------------------------------|---------------------------------------------------------------------------------------------------------------------------------------------------------------------------------------------------------|----|
|              | Robson 2013 <sup>28</sup>    | US     | All in-patients | Case-control study (retrospective) | 1 | No | Ext | Code blue call                                | 192 (96 cases)  | S | 5 / 32 | Max 24hrs before event (6 hourly)           | 0.85 | 86.6 | 72.2 |      | Four researchers independently scored PTTT from 20 charts, with inter-rater reliability of 0.95. Individually scored for rest of study. Interpretation of subjective variables agreed in advance within research team. | 8                                                                                                                                                                                                       |    |
|              | Chapman 2017 <sup>6</sup>    | UK     | All in-patients | Case-control study (retrospective) | 1 | No | Ext | Death, arrest or unplanned PICU transfer      | 608 (297 cases) | S | 7 / 32 | Max 48hrs before event (per usual practice) | 0.82 | 70.0 | 75.0 | 72.6 | 72.0                                                                                                                                                                                                                   | Data abstraction completed by single researcher.<br><br>36% of observation sets contained HR, RR, O2 Sats, systolic BP, temperature and assessment of consciousness. Missing data assumed to be normal. | 17 |
| Bedside PEWS | Parshuram 2009 <sup>11</sup> | Canada | All in-patients | Case-control study (retrospective) | 1 | No | Int | Urgent PICU transfer (without code blue call) | 180 (60 cases)  | S | 8 / 26 | Max 24hrs before event (hourly)             | 0.91 | 82.0 | 93.0 |      | Accuracy of data abstraction not assessed.<br><br>Availability of scoring items in medical records varied from 27% (cap refill time) to 93% (oxygen therapy). Missing data assumed to be normal.                       | 21                                                                                                                                                                                                      |    |

1  
2  
3  
4  
5  
6  
7  
8  
9  
10  
11  
12  
13  
14  
15  
16  
17  
18  
19  
20  
21  
22  
23  
24  
25  
26  
27  
28  
29  
30  
31  
32  
33  
34  
35  
36  
37  
38  
39  
40  
41  
42  
43  
44  
45  
46  
47

|  |                              |             |                 |                                    |   |    |     |                                                              |                   |   |      |                                   |      |      |      |      |                                                                                                                                                                                                                                                   |    |
|--|------------------------------|-------------|-----------------|------------------------------------|---|----|-----|--------------------------------------------------------------|-------------------|---|------|-----------------------------------|------|------|------|------|---------------------------------------------------------------------------------------------------------------------------------------------------------------------------------------------------------------------------------------------------|----|
|  | Parshuram 2011 <sup>44</sup> | Canada & UK | All in-patients | Case-control study (prospective)   | 4 | No | Ext | Urgent PICU transfer or immediate call to resuscitation team | 2,074 (686 cases) | S | 7/26 | Max 24hrs before event (hourly)   | 0.87 | 64.0 | 91.0 |      | PTTT scores calculated electronically after abstraction from charts by single research nurse. No details on accuracy / reliability of scoring.<br><br>5.1% of observation sets had all 7 items recorded, 31% had at least 5 items.                | 22 |
|  | Robson 2013 <sup>28</sup>    | US          | All in-patients | Case-control study (retrospective) | 1 | No | Ext | Code blue call                                               | 192 (96 cases)    | S | 7/26 | Max 24hrs before event (6 hourly) | 0.73 | 56.3 | 78.1 |      | See above.                                                                                                                                                                                                                                        | 8  |
|  | Zhai 2014 <sup>19</sup>      | US          | All in-patients | Case-control study (retrospective) | 1 | No | Ext | Urgent PCU transfer within 24 hrs of admission               | 6,352 (53 cases)  | S | 7/26 | Max 24 hrs before event (hourly)  | 0.82 | 73.6 | 71.7 | 2.1† | Data directly extracted from electronic health records.<br><br>Authors reported minimal missing data. Excluded two items of Bedside PEWS (oxygen therapy and respiratory effort) from analysis due to difficulty abstracting from health records. | 17 |

|                           |                                          |             |                           |                                    |   |     |     |                                                                                                           |                    |   |        |                                              |      |      |      |      |                                                                           |            |    |
|---------------------------|------------------------------------------|-------------|---------------------------|------------------------------------|---|-----|-----|-----------------------------------------------------------------------------------------------------------|--------------------|---|--------|----------------------------------------------|------|------|------|------|---------------------------------------------------------------------------|------------|----|
|                           | Gawronski 2016 <sup>46</sup>             | Italy       | Stem Cell Transplant Unit | Case-control study (retrospective) | 1 | No  | Ext | Unexpected death, urgent consult with RRT or urgent PICU transfer                                         | 99 (19 cases)      | S | 6 / 26 | Score 4hrs before event                      | 0.90 | 79.0 | 97.5 |      | Data abstracted by research nurses. No details on accuracy / reliability. | 15         |    |
|                           | Chapman 2017 <sup>74</sup>               | UK          | All in-patients           | Case-control study (retrospective) | 1 | No  | Ext | Death, arrest or PICU transfer                                                                            | 608 (297 cases)    | S | 6 / 26 | Max 48hrs before event (per usual practice)  | 0.88 | 72.0 | 89.0 | 86.0 | 77.0                                                                      | See above. | 17 |
| Modified Bedside PEWS (a) | Fuijkschoot 2015 <sup>30</sup> (study 1) | Netherlands | Oncology ward             | Case-cohort study (retrospective)  | 1 | Yes | Int | Emergency medical intervention or reviewed by PICU staff or clinical condition considered 'sick' by staff | 118 (15 cases)     | S | 8 / 28 | Unclear (minimum 8 hourly)                   |      |      |      | 73.0 | PTTT used in practice – no details on accuracy / reliability of scoring.  | 10         |    |
|                           | Fuijkschoot 2015 <sup>30</sup> (study 2) | Netherlands | All in-patients           | Case-cohort study (retrospective)  | 1 | Yes | Int | PICU transfer                                                                                             | Unclear (24 cases) | S | 8 / 28 | Score 2-6hrs before event (minimum 8 hourly) |      | 66.6 |      |      | PTTT used in practice – no details on accuracy / reliability of scoring.  | 10         |    |
|                           |                                          |             |                           |                                    |   |     |     |                                                                                                           |                    |   |        |                                              |      |      |      |      | High rate of exclusions reported due to missing data.                     |            |    |

|                            |                                             |             |                      |                                    |   |     |     |                                |                    |   |        |                                             |      |      |      |      |      |                                                                                                                                                                                                            |                                                                                                             |    |
|----------------------------|---------------------------------------------|-------------|----------------------|------------------------------------|---|-----|-----|--------------------------------|--------------------|---|--------|---------------------------------------------|------|------|------|------|------|------------------------------------------------------------------------------------------------------------------------------------------------------------------------------------------------------------|-------------------------------------------------------------------------------------------------------------|----|
|                            | Fuijkschoot 2015 <sup>30</sup><br>(study 3) | Netherlands | All in-patients      | Case-cohort study (prospective)    | 1 | Yes | Int | Emergency medical intervention | Unclear (14 cases) | S | 8 / 28 | Unclear (minimum 8 hourly)                  |      | 100  |      |      |      |                                                                                                                                                                                                            | PTTT used in practice – no details on accuracy / reliability of scoring.<br><br>No details on missing data. | 10 |
|                            | Chapman 2017 <sup>74</sup>                  | UK          | All in-patients      | Case-control study (retrospective) | 1 | No  | Ext | Death, arrest or PICU transfer | 608 (297 cases)    | S | 7 / 28 | Max 48hrs before event (per usual practice) | 0.87 | 69.0 | 91.0 | 87.9 | 79.0 | See above.                                                                                                                                                                                                 | 17                                                                                                          |    |
| Modified Bedside PEWS (b)  | Ross 2015 <sup>49</sup>                     | US          | All in-patients      | Case-control study (retrospective) | 1 | No  | Int | Urgent PICU transfer           | 4628 (848 cases)   | S | 8 / 26 | Max during admission                        |      | 70.0 | 84.0 |      |      | No details on data abstraction.<br><br>Respiratory effort category excluded due to difficulty abstracting from local charts. No details on missing data.                                                   | 9                                                                                                           |    |
| Modified Brighton PEWS (a) | Tucker 2008 <sup>31</sup>                   | US          | General medical unit | Cohort study (prospective)         | 1 | Yes | Int | PICU transfer                  | 2,979 (51 cases)   | S | 3 / 11 | Max during admission (4 hourly)             | 0.89 | 90.2 | 74.4 | 5.8  | 99.8 | PTTT used in practice by bedside nurses. Two bedside nurses independently scored 55 patients, within minutes of each other. Intraclass coefficient of 0.92 reported.<br><br>No discussion of missing data. | 14                                                                                                          |    |



1  
2  
3  
4  
5  
6  
7  
8  
9  
10  
11  
12  
13  
14  
15  
16  
17  
18  
19  
20  
21  
22  
23  
24  
25  
26  
27  
28  
29  
30  
31  
32  
33  
34  
35  
36  
37  
38  
39  
40  
41  
42  
43  
44  
45  
46  
47

|  |                          |    |                                                                                                   |                                    |   |     |     |                                                                                                                                                                                        |                                                                                 |   |        |                                 |      |      |      |      |                                                                                                                                                                                                                                                          |                                                                                                             |    |
|--|--------------------------|----|---------------------------------------------------------------------------------------------------|------------------------------------|---|-----|-----|----------------------------------------------------------------------------------------------------------------------------------------------------------------------------------------|---------------------------------------------------------------------------------|---|--------|---------------------------------|------|------|------|------|----------------------------------------------------------------------------------------------------------------------------------------------------------------------------------------------------------------------------------------------------------|-------------------------------------------------------------------------------------------------------------|----|
|  | Zhai 2014 <sup>19</sup>  | US | All in-patients                                                                                   | Case-control study (retrospective) | 1 | No  | Ext | Urgent PCU transfer within 24 hrs of admission                                                                                                                                         | 6,352 (53 cases)                                                                | S | 2 / 11 | Max 24hrs before event (hourly) | 0.74 | 68.4 | 81.6 | 2.3  | Data directly extracted from electronic health records.<br><br>Only included observation sets with a complete Brighton PEWS score (tool used in practice locally): 64% of eligible cases and 51% of eligible controls were excluded due to missing data. | 17                                                                                                          |    |
|  | Fenix 2015 <sup>39</sup> | US | PICU transfers among all in-patients (excluding haematology oncology, surgical and cardiac wards) | Case-control study (retrospective) | 1 | Yes | Ext | Non-elective PICU transfer followed by any intubation, inotropes, HFNC, non-invasive mechanical ventilation, or aggressive fluid resuscitation (>60 mL/kg) within 12 hours of transfer | 97 PICU transfers (51 cases of PICU transfer followed by 'deterioration event') | S | 3 / 11 | Max during admission            |      | 80.0 | 43.0 | 61.0 | 67.0                                                                                                                                                                                                                                                     | PTTT used in practice – no details on accuracy / reliability of scoring.<br><br>No details on missing data. | 15 |

1  
2  
3  
4  
5  
6  
7  
8  
9  
10  
11  
12  
13  
14  
15  
16  
17  
18  
19  
20  
21  
22  
23  
24  
25  
26  
27  
28  
29  
30  
31  
32  
33  
34  
35  
36  
37  
38  
39  
40  
41  
42  
43  
44  
45  
46  
47

|                            |                            |    |                 |                                    |   |    |     |                                            |                                          |   |        |                                             |      |      |      |      |      |            |    |  |                                                                                                                                                                                                                                                                                                                                                                                                                               |    |
|----------------------------|----------------------------|----|-----------------|------------------------------------|---|----|-----|--------------------------------------------|------------------------------------------|---|--------|---------------------------------------------|------|------|------|------|------|------------|----|--|-------------------------------------------------------------------------------------------------------------------------------------------------------------------------------------------------------------------------------------------------------------------------------------------------------------------------------------------------------------------------------------------------------------------------------|----|
| Modified Brighton PEWS (b) | Akre 2010 <sup>45</sup>    | US | All in-patients | Chart review study (retrospective) | 1 | No | Int | Rapid response team call or code blue call | 186 cases (170 RRT calls, 16 code calls) | S | 4 / 13 | Max 24 hrs before event (minimum 4 hourly)  |      |      |      |      |      | 85.5       |    |  | <p>Scores abstracted from charts by single nurse, initially working with advanced practice nurse. Independently scored same charts "until interrater reliability was achieved on a sample of 10 records".</p> <p>Categories scored as missing unless all necessary data from charts available. 25% of charts missing behavioural state and 26% missing cardiovascular colour. No details on how missing data was handled.</p> | 14 |
|                            | Chapman 2017 <sup>74</sup> | UK | All in-patients | Case-control study (retrospective) | 1 | No | Ext | Death, arrest or PICU transfer             | 608 (297 cases)                          | S | 4 / 13 | Max 48hrs before event (per usual practice) | 0.79 | 61.0 | 84.0 | 78.4 | 69.0 | See above. | 17 |  |                                                                                                                                                                                                                                                                                                                                                                                                                               |    |

1  
2  
3  
4  
5  
6  
7  
8  
9  
10  
11  
12  
13  
14  
15  
16  
17  
18  
19  
20  
21  
22  
23  
24  
25  
26  
27  
28  
29  
30  
31  
32  
33  
34  
35  
36  
37  
38  
39  
40  
41  
42  
43  
44  
45  
46  
47

|                                                 |                              |    |                        |                                    |   |     |     |                                   |                   |   |         |                                             |      |      |      |      |      |                                                                                                                                                                                                                                                                                              |    |
|-------------------------------------------------|------------------------------|----|------------------------|------------------------------------|---|-----|-----|-----------------------------------|-------------------|---|---------|---------------------------------------------|------|------|------|------|------|----------------------------------------------------------------------------------------------------------------------------------------------------------------------------------------------------------------------------------------------------------------------------------------------|----|
| Modified Brighton PEWS (d)                      | Skaletzky 2012 <sup>48</sup> | US | Medical surgical wards | Case-control study (retrospective) | 1 | No  | Int | PICU transfer                     | 350 (100 cases)   | S | 2.5 / 9 | Max 48hrs before event (4 hourly)           | 0.81 | 62.0 | 89.0 |      |      | Data abstracted from medial charts and notes. No details on reliability / validity of scoring. Score for behavioural category derived from level of consciousness assessment in charts, authors describe process as "subject to varying interpretations".<br><br>No details on missing data. | 15 |
|                                                 | Chapman 2017 <sup>74</sup>   | UK | All in-patients        | Case-control study (retrospective) | 1 | No  | Ext | Death, arrest or PICU transfer    | 608 (297 cases)   | S | 4 / 9   | Max 48hrs before event (per usual practice) | 0.74 | 46.0 | 90.0 | 81.3 | 63.0 | See above.                                                                                                                                                                                                                                                                                   | 17 |
| Children's Hospital Early Warning Score (CHEWS) | McLellan 2014 <sup>50</sup>  | US | All in-patients        | Case-control study (retrospective) | 1 | Yes | Int | Arrest or unplanned PICU transfer | 1,136 (360 cases) | S | 4 / 12  | Max in admission (4 hourly)                 | 0.90 | 84.2 | 80.9 |      |      | PTTT used in practice. No details on accuracy / reliability of scoring.<br><br>No details on missing data.                                                                                                                                                                                   | 10 |

1  
2  
3  
4  
5  
6  
7  
8  
9  
10  
11  
12  
13  
14  
15  
16  
17  
18  
19  
20  
21  
22  
23  
24  
25  
26  
27  
28  
29  
30  
31  
32  
33  
34  
35  
36  
37  
38  
39  
40  
41  
42  
43  
44  
45  
46  
47

|                                                           |                             |    |                     |                                    |   |     |     |                                   |                 |   |        |                                      |      |      |      |      |      |                                                                                                                                                                                                                                            |    |
|-----------------------------------------------------------|-----------------------------|----|---------------------|------------------------------------|---|-----|-----|-----------------------------------|-----------------|---|--------|--------------------------------------|------|------|------|------|------|--------------------------------------------------------------------------------------------------------------------------------------------------------------------------------------------------------------------------------------------|----|
| Children's Hospital Cardiac Early Warning Score (C-CHEWS) | McLellan 2013 <sup>23</sup> | US | Cardiovascular unit | Case-control study (retrospective) | 1 | Yes | Int | Arrest or unplanned PICU transfer | 312 (64 cases)  | S | 3 / 12 | Max 18hrs before event (4 hourly)    | 0.86 | 95.3 | 76.2 | 50.8 | 98.4 | PTTT used in practice. Study nurse and bedside nurses independently assessed scores for 37 patients, with 67% agreement.<br><br>No details on missing data.                                                                                | 9  |
|                                                           | Agulnik 2016 <sup>41</sup>  | US | Oncology unit       | Case-control study (retrospective) | 1 | Yes | Ext | Unplanned PICU transfer           | 330 (110 cases) | S | 4 / 12 | Max 24 hours before event (4 hourly) | 0.96 | 86.0 | 95.0 |      |      | PTTT used in practice, documented by nursing staff. No details about accuracy /reliability of scoring.<br><br>Did not abstract instances where vital signs were present but no PTTT score calculated by nurse. No details on missing data. | 14 |

1  
2  
3  
4  
5  
6  
7  
8  
9  
10  
11  
12  
13  
14  
15  
16  
17  
18  
19  
20  
21  
22  
23  
24  
25  
26  
27  
28  
29  
30  
31  
32  
33  
34  
35  
36  
37  
38  
39  
40  
41  
42  
43  
44  
45  
46  
47

|                                             |                            |           |                                             |                                    |   |     |     |                                                                                       |                 |   |        |                                                   |      |      |      |  |                                                                                                                                                                                                                                                                                                                     |    |
|---------------------------------------------|----------------------------|-----------|---------------------------------------------|------------------------------------|---|-----|-----|---------------------------------------------------------------------------------------|-----------------|---|--------|---------------------------------------------------|------|------|------|--|---------------------------------------------------------------------------------------------------------------------------------------------------------------------------------------------------------------------------------------------------------------------------------------------------------------------|----|
|                                             | Agulnik 2017 <sup>42</sup> | Guatemala | Oncology unit                               | Case-control study (retrospective) | 1 | Yes | Ext | Unplanned PICU transfer                                                               | 258 (129 cases) | S | 4 / 12 | Max 24hrs before event (3 hourly)                 |      | 91.0 | 88.0 |  | PTTT used in practice, documented by nursing staff. Researcher evaluated charts and calculated scores, reporting 14% error rate (PTTT score calculated incorrectly) and 3% omission rate (vital signs recorded but no PTTT score calculated).<br><br>1 out of 130 cases excluded due to missing PTTT documentation. | 16 |
| Children's Hospital Los Angeles (CHLA) PEWS | Mandell 2015 <sup>40</sup> | US        | In-patients discharged from PICU to ward    | Case-control study (retrospective) | 1 | Yes | Int | Early unplanned re-admission to PICU (within 48 hours of discharge from PICU to ward) | 189 (38 cases)  | S | 2 / 10 | First score assigned on ward, post PICU discharge | 0.71 | 76.0 | 56.0 |  | PTTT used in practice. No details on accuracy / reliability of scoring.<br><br>No details on missing data.                                                                                                                                                                                                          | 12 |
| Melbourne Activation Criteria (MAC)         | Tume 2007 <sup>3</sup>     | UK        | In-patients with an unplanned PICU transfer | Chart review study (retrospective) | 1 | No  | Ext | Unplanned PICU transfer                                                               | 33 cases        | T | NA     | Unclear                                           |      | 87.8 |      |  | Data abstracted by two reviewers. No details on accuracy / reliability of scoring.<br><br>Reference to "large number of missing records and observation charts".                                                                                                                                                    | 11 |

1  
2  
3  
4  
5  
6  
7  
8  
9  
10  
11  
12  
13  
14  
15  
16  
17  
18  
19  
20  
21  
22  
23  
24  
25  
26  
27  
28  
29  
30  
31  
32  
33  
34  
35  
36  
37  
38  
39  
40  
41  
42  
43  
44  
45  
46  
47

|  |                            |    |                                             |                                    |   |    |     |                                         |                  |   |     |                                                 |      |      |      |      |      |  |  |                                                                                                                                                                                                                                                                                                                   |    |
|--|----------------------------|----|---------------------------------------------|------------------------------------|---|----|-----|-----------------------------------------|------------------|---|-----|-------------------------------------------------|------|------|------|------|------|--|--|-------------------------------------------------------------------------------------------------------------------------------------------------------------------------------------------------------------------------------------------------------------------------------------------------------------------|----|
|  | Tume 2007 <sup>3</sup>     | UK | In-patients with an unplanned PHDU transfer | Chart review study (retrospective) | 1 | No | Ext | Unplanned PHDU transfer                 | 32 cases         | T | N/A | Unclear                                         |      |      |      |      | 87.5 |  |  | See above.                                                                                                                                                                                                                                                                                                        | 11 |
|  | Edwards 2011 <sup>33</sup> | UK | All in-patients                             | Cohort study (retrospective)       | 1 | No | Ext | Death or unplanned PICU or HDU transfer | 1,000 (16 cases) | T | N/A | Any trigger over admission (per usual practice) | 0.79 | 68.3 | 83.2 | 3.6  | 99.7 |  |  | Observation charts altered to include all PTTT parameters but PTTT not used in practice. Data abstracted and scores calculated by researcher. No detail on reliability / accuracy of scoring.<br><br>56% of records reviewed were missing at least one required PTTT criteria. Missing data assumed to be normal. | 17 |
|  | Chapman 2017 <sup>74</sup> | UK | All in-patients                             | Case-control study (retrospective) | 1 | No | Ext | Death, arrest or PICU transfer          | 608 (297 cases)  | T | NA  | Max 48hrs before event (per usual practice)     | 0.71 | 93.0 | 49.0 | 64.0 | 88.0 |  |  | See above.                                                                                                                                                                                                                                                                                                        | 17 |

|                                                         |                            |    |                                             |                                    |   |    |     |                                         |                  |   |       |                                                 |      |      |      |      |      |                                                                                                                                                                                                                                                                                                                   |    |
|---------------------------------------------------------|----------------------------|----|---------------------------------------------|------------------------------------|---|----|-----|-----------------------------------------|------------------|---|-------|-------------------------------------------------|------|------|------|------|------|-------------------------------------------------------------------------------------------------------------------------------------------------------------------------------------------------------------------------------------------------------------------------------------------------------------------|----|
| Cardiff & Vale Paediatric Early Warning Score (C&VPEWS) | Edwards 2009 <sup>32</sup> | UK | All in-patients                             | Cohort study (prospective)         | 1 | No | Int | Death or unplanned PICU or HDU transfer | 1,000 (16 cases) | S | 2 / 8 | Max score during admission (per usual practice) | 0.86 | 69.5 | 89.9 | 5.9  | 99.7 | Observation charts altered to include all PTTT parameters but PTTT not used in practice. Data abstracted and scores calculated by researcher. No detail on reliability / accuracy of scoring.<br><br>56% of records reviewed were missing at least one required PTTT criteria. Missing data assumed to be normal. | 18 |
|                                                         | Chapman 2017 <sup>74</sup> | UK | All in-patients                             | Case-control study (retrospective) | 1 | No | Ext | Death, arrest or PICU transfer          | 608 (297 cases)  | S | 3 / 8 | Max 48hrs before event (per usual practice)     | 0.89 | 80.0 | 86.0 | 84.0 | 82.0 | See above.                                                                                                                                                                                                                                                                                                        | 17 |
| Bristol Paediatric Early Warning Tool (PEWT)            | Tume 2007 <sup>3</sup>     | UK | In-patients with an unplanned PICU transfer | Chart review (retrospective)       | 1 | No | Ext | Unplanned PICU transfer                 | 33 cases         | T | N/A   | Unclear                                         |      |      |      |      |      | Data abstracted by two reviewers. No details on accuracy / reliability of scoring.<br><br>Reference to "large number of missing records and observation charts".                                                                                                                                                  | 11 |
|                                                         | Tume 2007 <sup>3</sup>     | UK | In-patients with an unplanned PHDU transfer | Chart review (retrospective)       | 1 | No | Ext | Unplanned PHDU transfer                 | 32 cases         | T | N/A   | Unclear                                         |      | 84.4 |      |      |      | See above.                                                                                                                                                                                                                                                                                                        | 11 |

|                                                           |                               |    |                 |                                    |   |     |     |                                |                               |   |     |                                                      |      |      |      |      |            |                                                                         |    |
|-----------------------------------------------------------|-------------------------------|----|-----------------|------------------------------------|---|-----|-----|--------------------------------|-------------------------------|---|-----|------------------------------------------------------|------|------|------|------|------------|-------------------------------------------------------------------------|----|
|                                                           | Wright 2011 <sup>35</sup>     | UK | All in-patients | Chart review (retrospective)       | 1 | Yes | Ext | Cardiac arrest                 | 55 cases                      | T | N/A | If triggered 24hrs before event                      |      | 49.1 |      |      |            | PTTT used in practice. No details on accuracy / reliability of scoring. | 11 |
|                                                           | O'Loughlin 2012 <sup>34</sup> | UK | All in-patients | Cohort study (prospective)         | 1 | Yes | Ext | PICU transfer                  | 331 (7 cases)                 | T | N/A | Triggered during admission (12hrly)                  | 0.91 | 100  | 81.0 | 11.0 |            | PTTT used in practice. No details on accuracy / reliability of scoring. | 6  |
|                                                           | Robson 2013 <sup>28</sup>     | US | All in-patients | Case-control study (retrospective) | 1 | No  | Ext | Code blue call                 | 192 (96 cases)                | T | N/A | Triggered 24hrs before event (6hrly)                 | 0.75 | 76.3 | 61.5 |      | See above. | 8                                                                       |    |
|                                                           | Chapman 2017 <sup>74</sup>    | UK | All in-patients | Case-control study (retrospective) | 1 | No  | Ext | Death, arrest or PICU transfer | 608 (297 cases)               | T | N/A | If triggered 48hrs before event (per usual practice) | 0.62 | 96.0 | 28.0 | 56.0 | 88.0       | See above.                                                              | 17 |
| Modified Bristol Paediatric Early Warning Tool (PEWT) (b) | Clayson 2014 <sup>38</sup>    | UK | Cardiac ward    | Cohort study (prospective)         | 1 | Yes | Int | 'A deteriorating patient'      | 126 (unclear number of cases) | T | N/A | Unclear                                              |      |      | 12.5 | 97.0 |            | PTTT used in practice. No details on accuracy / reliability of scoring. | 5  |



1  
2  
3  
4  
5  
6  
7  
8  
9  
10  
11  
12  
13  
14  
15  
16  
17  
18  
19  
20  
21  
22  
23  
24  
25  
26  
27  
28  
29  
30  
31  
32  
33  
34  
35  
36  
37  
38  
39  
40  
41  
42  
43  
44  
45  
46  
47

|                                                             |                            |    |                 |                                    |   |    |     |                                                 |                  |   |       |                                               |      |      |      |      |      |                                                                                                                                                                                                                                                                                                                   |    |
|-------------------------------------------------------------|----------------------------|----|-----------------|------------------------------------|---|----|-----|-------------------------------------------------|------------------|---|-------|-----------------------------------------------|------|------|------|------|------|-------------------------------------------------------------------------------------------------------------------------------------------------------------------------------------------------------------------------------------------------------------------------------------------------------------------|----|
| NHS Institute for Innovation and Improvement (NHS III) PEWS | Mason 2016 <sup>14</sup>   | UK | All in-patients | Cohort study (retrospective)       | 1 | No | Ext | Death or unplanned PICU or HDU transfer         | 1,000 (16 cases) | S | 2 / 7 | Max score over admission (per usual practice) | 0.88 | 80.0 | 81.0 | 4.3  | 99.7 | Observation charts altered to include all PTTT parameters but PTTT not used in practice. Data abstracted and scores calculated by researcher. No detail on reliability / accuracy of scoring.<br><br>56% of records reviewed were missing at least one required PTTT criteria. Missing data assumed to be normal. | 15 |
|                                                             | Chapman 2017 <sup>74</sup> | UK | All in-patients | Case-control study (retrospective) | 1 | No | Ext | Death, arrest or PICU transfer                  | 608 (297 cases)  | S | 2 / 7 | Max 48hrs before event (per usual practice)   | 0.82 | 83.0 | 65.0 | 69.6 | 80.0 | See above.                                                                                                                                                                                                                                                                                                        | 17 |
| Logistic regression algorithm                               | Zhai 2014 <sup>19</sup>    | US | All in-patients | Case-control study (retrospective) | 1 | No | Ext | Urgent PICU transfer within 24 hrs of admission | 6,352 (53 cases) | S | > 0.5 | Max 24hrs before event (hourly)               | 0.91 | 84.9 | 85.9 | 4.8  |      | Data directly extracted from electronic health records.<br><br>Missing values assigned separate category in regression model. No details on extent of missing data but authors report that "missing data was a major cause of incorrect prediction".                                                              | 17 |

|                                                                                                                                                                                                                                                                                                                                                                                                                                                                                                                                                                                                                                                                                                                                                                                                                                                                                                                                                                                                                                                                                                                                                                                                                                                                                                                                                                                                                                                                                                                                                                                                                                                                                                                                                                                                                                                                                                                                                                                                                                                                                                                                                                                                                                                          |                               |    |                             |                              |   |     |     |                       |     |   |        |                                  |  |      |  |  |  |                                                                                                                                      |   |
|----------------------------------------------------------------------------------------------------------------------------------------------------------------------------------------------------------------------------------------------------------------------------------------------------------------------------------------------------------------------------------------------------------------------------------------------------------------------------------------------------------------------------------------------------------------------------------------------------------------------------------------------------------------------------------------------------------------------------------------------------------------------------------------------------------------------------------------------------------------------------------------------------------------------------------------------------------------------------------------------------------------------------------------------------------------------------------------------------------------------------------------------------------------------------------------------------------------------------------------------------------------------------------------------------------------------------------------------------------------------------------------------------------------------------------------------------------------------------------------------------------------------------------------------------------------------------------------------------------------------------------------------------------------------------------------------------------------------------------------------------------------------------------------------------------------------------------------------------------------------------------------------------------------------------------------------------------------------------------------------------------------------------------------------------------------------------------------------------------------------------------------------------------------------------------------------------------------------------------------------------------|-------------------------------|----|-----------------------------|------------------------------|---|-----|-----|-----------------------|-----|---|--------|----------------------------------|--|------|--|--|--|--------------------------------------------------------------------------------------------------------------------------------------|---|
| Burton Paediatric Early Warning Score (BPEWS)                                                                                                                                                                                                                                                                                                                                                                                                                                                                                                                                                                                                                                                                                                                                                                                                                                                                                                                                                                                                                                                                                                                                                                                                                                                                                                                                                                                                                                                                                                                                                                                                                                                                                                                                                                                                                                                                                                                                                                                                                                                                                                                                                                                                            | Ahmed 2012 <sup>36</sup>      | UK | PICU admissions only        | Chart review (retrospective) | 1 | Yes | Int | PICU admission        | 23  | S | 4 / 19 | Max 24hrs before event (unclear) |  | 93.0 |  |  |  | Data extracted from case notes by two reviewers. No details on reliability / accuracy of scoring.<br><br>No details on missing data. | 4 |
| 'Between the Flags' Paediatric Early Warning System (PEWS)                                                                                                                                                                                                                                                                                                                                                                                                                                                                                                                                                                                                                                                                                                                                                                                                                                                                                                                                                                                                                                                                                                                                                                                                                                                                                                                                                                                                                                                                                                                                                                                                                                                                                                                                                                                                                                                                                                                                                                                                                                                                                                                                                                                               | Blackstone 2017 <sup>43</sup> | UK | Urgent PICU admissions only | Chart review (retrospective) | 1 | Yes | Ext | Urgent PICU admission | 100 | T | NA     | Unclear                          |  | 91.0 |  |  |  | Data extracted from health records.<br><br>No details on missing data.                                                               | 8 |
| <p>All studies conducted in a specialist / tertiary centre.</p> <p>PPV and NPV values in italics represent results from case-control studies – these values are misleading in isolation because they assume that the wider prevalence rate of the adverse event is equal to the case to control ratio used in the research study (e.g., if the researchers studied 300 cases and 300 controls, the prevalence rate of adverse events for the calculation of PPV is 50%). As per the cohort studies, prevalence rates of critical events are typically far lower among hospitalised paediatric populations than the case/control ratios used in studies, and so PPV values would be considerably lower in clinical practice.</p> <p>Studies classified as internal validation if the setting for the study was the same hospital and same research team as those who developed the score. Studies classified as external validation if the score was tested in a different centre and by a different research team to those who developed it.</p> <p>* Typically, study researchers collected or abstracted multiple PTTT scores for each patient at different time points, but can only use one score per patient for the analysis of the tool's predictive ability. This column specifies which score the researchers used. In most cases, the study team used the maximum PTTT score recorded for each patient in a given study window – e.g., 24 hours prior to a critical event for case patients. The text in parentheses describes the frequency with which scores were assessed or abstracted for each patient, if this information was described in the paper.</p> <p>† Case-control study, but PPV value calculated based on clinical prevalence of event as measured at local centre during the study</p> <p>PTTT, paediatric track and trigger tool; S, score; T, trigger; AUROC, area under the receiver operating characteristic curve; PPV, positive predictive value, NPV, negative predictive value; PICU, paediatric intensive care unit; PHDU, paediatric high-dependency unit; RRT, rapid response team; HFNC, high flow nasal cannula; UK, United Kingdom; US, United States; Int, Internal validation; Ext, external validation</p> |                               |    |                             |                              |   |     |     |                       |     |   |        |                                  |  |      |  |  |  |                                                                                                                                      |   |

**Table 4 – summary of early warning system effectiveness study outcomes**

| Outcome                                                                   | Refs (first author, year)   | Intervention           |                           |                             |                            | PTTT                                                      | Country   | Number of centres | Specialist unit? | Existing RRT / MET? | Population      | Study design                                  | Study duration in months | Events before, n (rate) | Events after, n (rate) | Effect size (95% CI)               | P Value | Description of findings                                                             | Quality score (max = 26) |
|---------------------------------------------------------------------------|-----------------------------|------------------------|---------------------------|-----------------------------|----------------------------|-----------------------------------------------------------|-----------|-------------------|------------------|---------------------|-----------------|-----------------------------------------------|--------------------------|-------------------------|------------------------|------------------------------------|---------|-------------------------------------------------------------------------------------|--------------------------|
|                                                                           |                             | Implemented a new PTTT | Implemented new RRT / MET | Modified escalation process | Staff training / education |                                                           |           |                   |                  |                     |                 |                                               |                          |                         |                        |                                    |         |                                                                                     |                          |
| <b>MORTALITY</b>                                                          |                             |                        |                           |                             |                            |                                                           |           |                   |                  |                     |                 |                                               |                          |                         |                        |                                    |         |                                                                                     |                          |
| Deaths on ward (per 1,000 admissions)                                     | Tibballs 2005 <sup>13</sup> | ✓                      | ✓                         | ✓                           |                            | Melbourne Activation Criteria (MAC)                       | Australia | 1                 | Y                | N                   | All in-patients | Uncontrolled before-after study (prospective) | 53 (41 before, 12 after) | 13 (0.12)               | 2 (0.06)               | RR = 0.45 (0.10-1.99) <sup>†</sup> | 0.29    | No change in rate of deaths on ward, post intervention                              | 10                       |
| Hospital-wide deaths (per 100 discharges)                                 | Sharek 2007 <sup>17</sup>   | ✓                      | ✓                         | ✓                           |                            | Paediatric Rapid Response Team (PRRT) triggering criteria | US        | 1                 | Y                | N                   | All in-patients | Uncontrolled before-after study (prospective) | 84 (67 before, 17 after) | 547 (1.01)              | 158 (0.83)             | RR = 0.82 (0.70-0.95)              | .007    | <b>Significant reduction in rate of deaths per 100 discharges post intervention</b> | 15                       |
| Hospital wide deaths, excluding neonate ICU and ED (per 1,000 discharges) | Zenker 2007 <sup>68</sup>   | ✓                      | ✓                         |                             |                            | RRT activation criteria*                                  | US        | 1                 | Y                | N                   | All in-patients | Uncontrolled before-after study (prospective) | 34 (23 before, 11 after) | 97 (4.30)               | 52 (4.45)              | RR=1.04 (0.74-1.45) <sup>†</sup>   | .57     | No change in rate of hospital-wide deaths, post intervention                        | 12                       |

|                                                     |                              |   |   |   |                                                                  |                                                                    |        |   |   |                 |                                                 |                             |                                                  |                                                   |                               |         |                                                                                                                      |    |
|-----------------------------------------------------|------------------------------|---|---|---|------------------------------------------------------------------|--------------------------------------------------------------------|--------|---|---|-----------------|-------------------------------------------------|-----------------------------|--------------------------------------------------|---------------------------------------------------|-------------------------------|---------|----------------------------------------------------------------------------------------------------------------------|----|
| Deaths outside ICU (per 1,000 non-ICU patient-days) | Brilli 2007 <sup>15</sup>    | ✓ | ✓ | ✓ | Paediatric Medical Emergency Team (PMET) triggering criteria (a) | US                                                                 | 1      | Y | N | All in-patients | Uncontrolled before-after study (prospective)   | 27<br>(15 before, 12 after) | 9<br>(0.10)                                      | 2<br>(0.04)                                       | RR=0.39<br>(0.08-1.80)<br>†   | .13     | Non-significant trend towards reduced rate of mortality outside of ICU, post intervention                            | 14 |
| Ward death rate (per 1,000 ward admissions)         | Hanson 2010 <sup>63</sup>    | ✓ | ✓ | ✓ | Not described                                                    | US                                                                 | 1      | Y | N | All in-patients | Uncontrolled before-after study (retrospective) | 36<br>(24 before, 12 after) | 13<br>(1.50)                                     | 2<br>(0.45)                                       | RR = 0.30<br>(0.07-1.31)<br>† | .07     | Non-significant trend towards reduced rate of ward deaths, post intervention                                         | 18 |
| Total hospital deaths (per 1,000 admissions)        | Tibballs 2009 <sup>67</sup>  | ✓ | ✓ | ✓ | Melbourne Activation Criteria (MAC)                              | Australia                                                          | 1      | Y | N | All in-patients | Uncontrolled before-after study (prospective)   | 89<br>(41 before, 48 after) | 459<br>(4.38)                                    | 398<br>(2.87)                                     | RR = 0.65<br>(0.57-0.75)      | < .0001 | Significant reduction in rate of total hospital deaths, post intervention                                            | 15 |
| Deaths on ward (per 1,000 admissions)               | Tibballs 2009 <sup>67</sup>  | ✓ | ✓ | ✓ | Melbourne Activation Criteria (MAC)                              | Australia                                                          | 1      | Y | N | All in-patients | Uncontrolled before-after study (prospective)   | 89<br>(41 before, 48 after) | 13<br>(0.12)                                     | 6<br>(0.04)                                       | RR = 0.35<br>(0.13-0.92)      | .03     | Significant reduction in rate of deaths on ward ('unexpected deaths'), post intervention                             | 15 |
| All-cause hospital mortality (per 1,000 admissions) | Kotsakis 2011 <sup>64</sup>  | ✓ | ✓ |   | Modified MAC                                                     | Canada                                                             | 4      | Y | N | All in-patients | Uncontrolled before-after study (prospective)   | 48<br>(24 before, 24 after) | 553<br>(9.97)                                    | 540<br>(9.65)                                     | RR = 0.97<br>(0.83-1.12)      | .65     | No change in all-cause hospital mortality rate post intervention                                                     | 18 |
| All cause hospital mortality (per 1,000 discharges) | Parshuram 2018 <sup>65</sup> | ✓ | ✓ | ✓ | Bedside PEWS                                                     | Belgium, Ireland, Netherlands, England, Italy, Canada, New Zealand | 2<br>1 | Y | N | All in-patients | Cluster randomised trial (prospective)          | 18<br>(6 pre, 12 post)      | Con:<br>61<br>(1.31)<br><br>Int:<br>52<br>(1.95) | Con:<br>147<br>(1.56)<br><br>Int:<br>97<br>(1.93) | OR=1.01<br>(0.61-1.69)        | .96     | No significant difference in pre and post intervention mortality rates between intervention and usual care hospitals | 23 |

|                                                                                         |                                    |   |   |  |  |                                                               |          |    |   |   |                 |                                                 |                            |            |           |                                    |                   |                                                                                                                                                               |    |
|-----------------------------------------------------------------------------------------|------------------------------------|---|---|--|--|---------------------------------------------------------------|----------|----|---|---|-----------------|-------------------------------------------------|----------------------------|------------|-----------|------------------------------------|-------------------|---------------------------------------------------------------------------------------------------------------------------------------------------------------|----|
| Hospital mortality (per 1,000 admissions)                                               | Kutty 2018 <sup>61</sup>           | ✓ |   |  |  | NR                                                            | US       | 38 | Y | N | All in-patients | Interrupted Time Series (retrospective)         | 180 (60 before, 120 after) | NA         | NA        | OR=0.94 (0.93-0.95)                | .98               | No significant difference in trend of adjusted mortality rate five years post intervention, compared to expected trend based on pre-implementation trajectory | 20 |
| <b>PICU MORTALITY</b>                                                                   |                                    |   |   |  |  |                                                               |          |    |   |   |                 |                                                 |                            |            |           |                                    |                   |                                                                                                                                                               |    |
| PICU mortality after PICU admission from ward (per PICU admission)                      | Anwar-al-Haque, 2010 <sup>18</sup> | ✓ | ✓ |  |  | Paediatric Rapid Response Team (PRRT) triggering criteria (b) | Pakistan | 1  | Y | N | All in-patients | Uncontrolled before-after study (retrospective) | 18 (9 before, 9 after)     | 23 (51.11) | 5 (15.63) | RR = 0.31 (0.13-0.72) <sup>†</sup> | .007 <sup>†</sup> | Significant reduction in mortality rate among patients admitted to PICU from ward, post intervention                                                          | 6  |
| PICU mortality after PICU readmission within 48 hrs of discharge (per 1,000 admissions) | Kotsakis 2011 <sup>64</sup>        | ✓ | ✓ |  |  | Modified MAC                                                  | Canada   | 4  | Y | N | All in-patients | Uncontrolled before-after study (prospective)   | 48 (24 before, 24 after)   | 16 (0.29)  | 7 (0.13)  | RR = 0.43 (0.17-0.99)              | <.05              | Significant reduction in mortality rate among patients readmitted to PICU within 48hrs of discharge, post intervention                                        | 18 |
| PICU mortality after urgent PICU admission from ward (per 1,000 admissions)             | Kotsakis 2011 <sup>64</sup>        | ✓ | ✓ |  |  | Modified MAC                                                  | Canada   | 4  | Y | N | All in-patients | Uncontrolled before-after study (prospective)   | 48 (24 before, 24 after)   | 70 (1.3)   | 61 (1.1)  | RR = 0.90 (0.70-1.00)              | .25               | No change in PICU mortality rate after urgent PICU admission, post intervention                                                                               | 18 |

|                                                        |                              |   |   |   |   |                                                           |                                                                    |        |   |   |                               |                                                 |                             |                                                  |                                                  |                               |      |                                                                                                                          |    |
|--------------------------------------------------------|------------------------------|---|---|---|---|-----------------------------------------------------------|--------------------------------------------------------------------|--------|---|---|-------------------------------|-------------------------------------------------|-----------------------------|--------------------------------------------------|--------------------------------------------------|-------------------------------|------|--------------------------------------------------------------------------------------------------------------------------|----|
| Death prior to discharge (per unplanned PICU transfer) | Bonafide 2014 <sup>62</sup>  | ✓ | ✓ |   |   | Bedside PEWS                                              | US                                                                 | 1      | Y | N | All in-patients               | Interrupted Time Series study (prospective)     | 59<br>(32 before, 27 after) | 51<br>(6.3)                                      | 56<br>(6.5)                                      | RR = 1.03<br>(0.72-1.49)<br>† | .99  | No change in death rate prior to discharge among unplanned PICU transfers post intervention                              | 23 |
| PICU mortality (per PICU admission)                    | Duns 2014 <sup>73</sup>      | ✓ |   |   |   | Between the Flags (BTS) tool*                             | Australia                                                          | 1      | Y | Y | All in-patients               | Uncontrolled before-after study (prospective)   | 48<br>(24 before, 24 after) | 30<br>(8.57)                                     | 20<br>(5.49)                                     | RR=0.64<br>(0.37-1.11)<br>†   | .14  | Non-significant trend towards reduction in rate of PICU mortality after PICU admission, post intervention                | 7  |
| Death in PICU (per 1,000 patient-days)                 | Agulnik 2017 <sup>71</sup>   | ✓ |   |   | ✓ | Children's Hospital Cardiac Early Warning Score (C-CHEWS) | Guatemala                                                          | 1      | Y | N | Oncology unit                 | Uncontrolled before-after study (retrospective) | 24<br>(12 before, 12 after) | 21<br>(1.25)                                     | 22<br>(1.10)                                     | RR=0.89<br>(0.49-1.61)<br>†   | .76  | No change in rate of deaths in PICU, post intervention                                                                   | 19 |
| Death in PICU (per emergency PICU admission)           | Sefton 2015 <sup>69</sup>    | ✓ |   | ✓ | ✓ | Modified Bristol PEWT (a)                                 | UK                                                                 | 1      | Y | N | All PICU admissions           | Controlled before-after study (retrospective)   | 24<br>(12 before, 12 after) | 17<br>(10.8)                                     | 14<br>(8.4)                                      | RR = 0.78<br>(0.40-1.53)<br>† | .47  | No change in PICU mortality rate among PICU emergency admissions, post intervention                                      | 16 |
| Deaths in PICU (per unplanned PICU admission)          | Kolovos, 2018                | ✓ | ✓ |   |   | RRT activation criteria*                                  | US                                                                 | 1      | Y | N | All unplanned PICU admissions | Uncontrolled before-after study (retrospective) | 78<br>(42 before, 36 after) | 54+<br>(4.9)                                     | 40+<br>(3.8)                                     | RR = 0.77<br>(0.52-1.15)<br>† | .20+ | No change in PICU mortality rate among PICU admissions, post interventions                                               | 12 |
| PICU mortality (per 1,000 discharges)                  | Parshuram 2018 <sup>65</sup> | ✓ | ✓ |   | ✓ | Bedside PEWS                                              | Belgium, Ireland, Netherlands, England, Italy, Canada, New Zealand | 2<br>1 | Y | N | All in-patients               | Cluster randomised trial (prospective)          | 18<br>(6 pre, 12 post)      | Con:<br>34<br>(0.73)<br><br>Int:<br>33<br>(1.24) | Con:<br>91<br>(0.96)<br><br>Int:<br>56<br>(1.12) | OR=0.95<br>(0.48-1.86)        | .88  | No significant difference in pre and post intervention PICU mortality rate between intervention and usual care hospitals | 23 |
| <b>CARDIAC ARREST</b>                                  |                              |   |   |   |   |                                                           |                                                                    |        |   |   |                               |                                                 |                             |                                                  |                                                  |                               |      |                                                                                                                          |    |

|                                                          |                             |   |   |   |                                                                  |           |   |   |   |                 |                                                 |                             |              |              |                               |     |                                                                                               |    |
|----------------------------------------------------------|-----------------------------|---|---|---|------------------------------------------------------------------|-----------|---|---|---|-----------------|-------------------------------------------------|-----------------------------|--------------|--------------|-------------------------------|-----|-----------------------------------------------------------------------------------------------|----|
| Cardiac arrests on ward (per 1,000 admissions)           | Tibballs 2005 <sup>13</sup> | ✓ | ✓ | ✓ | Melbourne Activation Criteria (MAC)                              | Australia | 1 | Y | N | All in-patients | Uncontrolled before-after study (prospective)   | 53<br>(41 before, 12 after) | 20<br>(0.19) | 4<br>(0.11)  | RR = 0.58<br>(0.20-1.70)      | .33 | No change in rate of cardiac arrests on ward, post intervention                               | 10 |
| Cardiopulmonary arrests (per 1,000 non-ICU patient-days) | Brilli 2007 <sup>15</sup>   | ✓ | ✓ | ✓ | Paediatric Medical Emergency Team (PMET) triggering criteria (a) | US        | 1 | Y | N | All in-patients | Uncontrolled before-after study (prospective)   | 27<br>(15 before, 12 after) | 7<br>(0.08)  | 2<br>(0.04)  | RR=0.50<br>(0.10-2.42)<br>†   | .11 | Non-significant trend towards reduction in rate of cardiopulmonary arrests, post intervention | 14 |
| Ward cardiac arrest rate (per 1,000 ward admissions)     | Hanson 2010 <sup>63</sup>   | ✓ | ✓ | ✓ | Not described                                                    | US        | 1 | Y | N | All in-patients | Uncontrolled before-after study (retrospective) | 36<br>(24 before, 12 after) | 11<br>(1.27) | 2<br>(0.45)  | RR = 0.35<br>(0.08-1.58)<br>† | .13 | Non-significant trend towards reduced cardiac arrest rate, post intervention                  | 18 |
| Ward cardiopulmonary arrests (per 1,000 patient-days)    | Hunt 2008 <sup>16</sup>     | ✓ | ✓ | ✓ | Paediatric Medical Emergency Team (PMET) triggering criteria     | US        | 1 | Y | N | All in-patients | Uncontrolled before-after study (prospective)   | 24<br>(12 before, 12 after) | 5<br>(0.10)  | 5<br>(0.10)  | RR = 0.98<br>(0.22-4.24)      | .97 | No change in cardiopulmonary arrest rate, post intervention                                   | 17 |
| Preventable cardiac arrests (per 1,000 admissions)       | Tibballs 2009 <sup>67</sup> | ✓ | ✓ | ✓ | Melbourne Activation Criteria (MAC)                              | Australia | 1 | Y | N | All in-patients | Uncontrolled before-after study (prospective)   | 89<br>(41 before, 48 after) | 17<br>(0.16) | 10<br>(0.07) | RR = 0.45<br>(0.20-0.97)      | .04 | <b>Significant reduction in rate of 'preventable cardiac arrests', post intervention</b>      | 15 |
| Unexpected cardiac arrests (per 1,000 admissions)        | Tibballs 2009 <sup>67</sup> | ✓ | ✓ | ✓ | Melbourne Activation Criteria (MAC)                              | Australia | 1 | Y | N | All in-patients | Uncontrolled before-after study (prospective)   | 89<br>(41 before, 48 after) | 20<br>(0.19) | 24<br>(0.17) | RR = 0.91<br>(0.50-1.64)      | .75 | No change in rate of 'unexpected cardiac arrests', post intervention                          | 15 |

|                                                            |                              |   |   |   |  |                                                              |                                                                    |    |   |   |                 |                                               |                             |                                        |                                        |                               |                 |                                                                                                                          |    |
|------------------------------------------------------------|------------------------------|---|---|---|--|--------------------------------------------------------------|--------------------------------------------------------------------|----|---|---|-----------------|-----------------------------------------------|-----------------------------|----------------------------------------|----------------------------------------|-------------------------------|-----------------|--------------------------------------------------------------------------------------------------------------------------|----|
| Actual cardiopulmonary arrests (per 1,000 ward admissions) | Kotsakis 2011 <sup>64</sup>  | ✓ | ✓ |   |  | Modified MAC                                                 | Canada                                                             | 4  | Y | N | All in-patients | Uncontrolled before-after study (prospective) | 48<br>(24 before, 24 after) | 69<br>(1.9)                            | 66<br>(1.8)                            | RR = 0.95<br>(0.76-1.96)      | .68             | No change in rate of cardiopulmonary arrests, post intervention                                                          | 18 |
| Near cardiopulmonary arrests (per 1,000 admissions)        | Kotsakis 2011 <sup>64</sup>  | ✓ | ✓ |   |  | Modified MAC                                                 | Canada                                                             | 4  | Y | N | All in-patients | Uncontrolled before-after study (prospective) | 48<br>(24 before, 24 after) | 123<br>(3.4)                           | 67<br>(1.9)                            | RR = 0.54<br>(0.52-0.57)      | <b>&lt;.001</b> | <b>Significant reduction in rate of 'near cardiopulmonary arrests' post intervention</b>                                 | 18 |
| Cardiac arrests on ward (per 1,000 non-ICU patient-days)   | Bonafide 2014 <sup>62</sup>  | ✓ | ✓ |   |  | Bedside PEWS                                                 | US                                                                 | 1  | Y | N | All in-patients | Interrupted Time Series study (prospective)   | 59<br>(32 before, 27 after) | 6 <sup>+</sup><br>(0.03)               | 2 <sup>+</sup><br>(0.01)               | RR = 0.36<br>(0.07-1.78)<br>† | .21             | No significant difference in rate of ward cardiac arrests, post intervention                                             | 23 |
| Cardiac arrests (per 1,000 patient-days)                   | Parshuram 2018 <sup>65</sup> | ✓ | ✓ | ✓ |  | Bedside PEWS                                                 | Belgium, Ireland, Netherlands, England, Italy, Canada, New Zealand | 21 | Y | N | All in-patients | Cluster randomised trial (prospective)        | 18<br>(6 pre, 12 post)      | Con: 18<br>(0.11)<br>Int: 15<br>(0.12) | Con: 32<br>(0.10)<br>Int: 27<br>(0.11) | RR=1.02<br>(0.65-1.62)        | .92             | No significant difference in pre and post intervention cardiac arrest rate between intervention and usual care hospitals | 23 |
| <b>RESPIRATORY ARREST</b>                                  |                              |   |   |   |  |                                                              |                                                                    |    |   |   |                 |                                               |                             |                                        |                                        |                               |                 |                                                                                                                          |    |
| Ward respiratory arrests (per 1,000 patient-days)          | Hunt 2008 <sup>16</sup>      | ✓ | ✓ |   |  | Paediatric Medical Emergency Team (PMET) triggering criteria | US                                                                 | 1  | Y | N | All in-patients | Uncontrolled before-after study (prospective) | 24<br>(12 before, 12 after) | 11<br>(0.23)                           | 3<br>(0.06)                            | RR = 0.27<br>(0.05-1.01)      | <b>.03</b>      | <b>Significant reduction in respiratory arrest rate, post intervention</b>                                               | 17 |
| <b>CARDIAC OR RESPIRATORY ARREST</b>                       |                              |   |   |   |  |                                                              |                                                                    |    |   |   |                 |                                               |                             |                                        |                                        |                               |                 |                                                                                                                          |    |



|                                                                |                                   |   |   |   |   |                                                                  |          |   |   |   |                 |                                                 |                             |               |              |                               |                  |                                                                                                       |    |
|----------------------------------------------------------------|-----------------------------------|---|---|---|---|------------------------------------------------------------------|----------|---|---|---|-----------------|-------------------------------------------------|-----------------------------|---------------|--------------|-------------------------------|------------------|-------------------------------------------------------------------------------------------------------|----|
| Cardiac or respiratory arrest (per 1,000 discharges)           | Zenker 2007 <sup>68</sup>         | ✓ | ✓ |   |   | RRT activation criteria*                                         | US       | 1 | Y | N | All in-patients | Uncontrolled before-after study (prospective)   | 34<br>(23 before, 11 after) | 180<br>(7.98) | 60<br>(5.13) | RR=0.64<br>(0.48-0.86)<br>†   | .19              | Non-significant trend towards reduction in rate of cardiac and respiratory arrests, post intervention | 12 |
| <b>CALLS FOR URGENT REVIEW / ASSISTANCE</b>                    |                                   |   |   |   |   |                                                                  |          |   |   |   |                 |                                                 |                             |               |              |                               |                  |                                                                                                       |    |
| Code calls (per 1,000 non-ICU patient-days)                    | Brilli 2007 <sup>15</sup>         | ✓ | ✓ |   | ✓ | Paediatric Medical Emergency Team (PMET) triggering criteria (a) | US       | 1 | Y | N | All in-patients | Uncontrolled before-after study (prospective)   | 27<br>(15 before, 12 after) | 25<br>(0.27)  | 6<br>(0.11)  | RR=0.42<br>(0.17-1.03)<br>†   | <b>.03</b>       | <b>Significant reduction in rate of code calls, post intervention</b>                                 | 14 |
| Code calls (per 1,000 non-ICU patient-days)                    | Sharek 2007 <sup>17</sup>         | ✓ | ✓ |   | ✓ | Paediatric Rapid Response Team (PRRT) triggering criteria        | US       | 1 | Y | N | All in-patients | Uncontrolled before-after study (prospective)   | 84<br>(67 before, 17 after) | 53<br>(0.52)  | 5<br>(0.15)  | RR = 0.29<br>(0.10-0.65)      | <b>.008</b>      | <b>Significant reduction in rate of code calls, post intervention</b>                                 | 15 |
| Code calls (per 1,000 admissions)                              | Anwar-al-Haque 2010 <sup>18</sup> | ✓ | ✓ |   |   | Paediatric Rapid Response Team (PRRT) triggering criteria (b)    | Pakistan | 1 | Y | N | All in-patients | Uncontrolled before-after study (retrospective) | 18<br>(9 before, 9 after)   | 26<br>(5.25)  | 12<br>(2.73) | RR = 0.52<br>(0.26-1.03)      | .06              | Non-significant trend towards reduction in rate of code calls, post intervention                      | 6  |
| Urgent calls to respiratory therapist (per 1,000 patient-days) | Parshuram 2011 <sup>70</sup>      | ✓ |   | ✓ | ✓ | Bedside PEWS                                                     | Canada   | 1 | N | N | All in-patients | Uncontrolled before-after study (prospective)   | 8<br>(3 before, 5 after)    | 8<br>(9.5)    | 8<br>(3.4)   | RR = 0.36<br>(0.13-0.95)<br>† | <b>&lt;.0001</b> | <b>Significant reduction in rate of urgent calls to respiratory therapist, post intervention</b>      | 23 |

|                                                        |                              |   |   |   |                               |           |   |   |   |                 |                                                 |                             |                 |                 |                               |        |                                                                                  |    |
|--------------------------------------------------------|------------------------------|---|---|---|-------------------------------|-----------|---|---|---|-----------------|-------------------------------------------------|-----------------------------|-----------------|-----------------|-------------------------------|--------|----------------------------------------------------------------------------------|----|
| Urgent calls to paediatrician (per 1,000 patient-days) | Parshuram 2011 <sup>70</sup> | ✓ | ✓ | ✓ | Bedside PEWS                  | Canada    | 1 | N | N | All in-patients | Uncontrolled before-after study (prospective)   | 8<br>(3 before, 5 after)    | 19<br>(22.6)    | 12<br>(5.1)     | RR = 0.23<br>(0.11-0.46)<br>† | <.0001 | Significant decrease in rate of urgent calls to paediatrician, post intervention | 23 |
| Code blue calls on the ward (per 1,000 admissions)     | Kotsakis 2011 <sup>64</sup>  | ✓ | ✓ |   | Modified MAC                  | Canada    | 4 | Y | N | All in-patients | Uncontrolled before-after study (prospective)   | 48<br>(24 before, 24 after) | 210<br>(3.75)   | 150<br>(2.70)   | RR = 0.71<br>(0.61-0.83)      | <.0001 | Significant reduction in rate of code blue calls, post intervention              | 18 |
| Urgent calls to outreach team (per 1,000 admissions)   | Duns 2014 <sup>73</sup>      | ✓ |   |   | Between the Flags (BTS) tool* | Australia | 1 | Y | Y | All in-patients | Uncontrolled before-after study (prospective)   | 48<br>(24 before, 24 after) | 1,058<br>(39.5) | 2,120<br>(76.0) | RR=1.92<br>(1.79-2.07)<br>†   | .02    | Significant increase in rate of urgent calls to outreach team, post intervention | 7  |
| RRT calls (per 1,000 patient-days)                     | Panesar 2014 <sup>60</sup>   |   |   | ✓ | Modified Brighton PEWS (e)    | US        | 1 | Y | Y | All in-patients | Uncontrolled before-after study (retrospective) | 42<br>(18 before, 24 after) | 44<br>(3.14)    | 69<br>(4.23)    | RR = 1.35<br>(0.92-1.96)<br>† | .11    | Non-significant trend towards increased RRT calls, post intervention             | 15 |
| RRT calls (per 1,000 patient days)                     | Douglas 2016 <sup>72</sup>   | ✓ | ✓ | ✓ | Modified Brighton PEWS (b)    | US        | 1 | Y | Y | All in-patients | Uncontrolled before-after study (retrospective) | 24<br>(12 before, 12 after) | 194<br>(6.17)   | 292<br>(9.80)   | RR = 1.59<br>(1.33-1.90)<br>† | <.001  | Significant increase in rate of RRT calls, post intervention                     | 12 |
| Code calls (per 1,000 patient days)                    | Douglas 2016 <sup>72</sup>   | ✓ | ✓ | ✓ | Modified Brighton PEWS (b)    | US        | 1 | Y | Y | All in-patients | Uncontrolled before-after study (retrospective) | 24<br>(12 before, 12 after) | 31<br>(0.98)    | 20<br>(0.67)    | RR = 0.68<br>(0.39-1.19)<br>† | .21    | No change in rate of code calls, post intervention                               | 12 |
| <b>PICU TRANSFERS</b>                                  |                              |   |   |   |                               |           |   |   |   |                 |                                                 |                             |                 |                 |                               |        |                                                                                  |    |

1  
2  
3  
4  
5  
6  
7  
8  
9  
10  
11  
12  
13  
14  
15  
16  
17  
18  
19  
20  
21  
22  
23  
24  
25  
26  
27  
28  
29  
30  
31  
32  
33  
34  
35  
36  
37  
38  
39  
40  
41  
42  
43  
44  
45  
46  
47

|                                                                                                     |                              |   |   |   |   |                                                           |           |   |   |   |                 |                                                 |                             |               |               |                               |      |                                                                                                                                                           |    |
|-----------------------------------------------------------------------------------------------------|------------------------------|---|---|---|---|-----------------------------------------------------------|-----------|---|---|---|-----------------|-------------------------------------------------|-----------------------------|---------------|---------------|-------------------------------|------|-----------------------------------------------------------------------------------------------------------------------------------------------------------|----|
| Transfers from ward to other specialist units (per 1,000 patient-days)                              | Parshuram 2011 <sup>70</sup> | ✓ |   | ✓ | ✓ | Bedside PEWS                                              | Canada    | 1 | N | N | All in-patients | Uncontrolled before-after study (prospective)   | 8<br>(3 before, 5 after)    | 5<br>(5.9)    | 19<br>(8.1)   | RR = 1.37<br>(0.51-3.63)<br>† | .04  | <b>Significant increase in rate of transfers from ward to specialist unit, post intervention</b>                                                          | 23 |
| Clinical deterioration events on ward prior to transfer to specialist unit (per 1,000 patient-days) | Parshuram 2011 <sup>70</sup> | ✓ |   | ✓ | ✓ | Bedside PEWS                                              | Canada    | 1 | N | N | All in-patients | Uncontrolled before-after study (prospective)   | 8<br>(3 before, 5 after)    | 2<br>(2.4)    | 1<br>(0.43)   | RR = 0.18<br>(0.02-1.97)<br>† | .01  | <b>Significant reduction in rate of clinical deterioration events on ward, post intervention</b>                                                          | 23 |
| PICU transfers (per 1,000 admissions)                                                               | Duns 2014 <sup>73</sup>      | ✓ |   |   |   | Between the Flags (BTS) tool*                             | Australia | 1 | Y | Y | All in-patients | Uncontrolled before-after study (prospective)   | 48<br>(24 before, 24 after) | 350<br>(13.1) | 364<br>(13.1) | RR=1.00<br>(0.86-1.16)<br>†   | .98  | No significant change in rate of PICU transfers, post intervention                                                                                        | 7  |
| Unplanned PICU transfers from ward (per 1,000 non-ICU patient-days)                                 | Bonafide 2014 <sup>62</sup>  | ✓ | ✓ |   |   | Bedside PEWS                                              | US        | 1 | Y | N | All in-patients | Interrupted Time Series study (prospective)     | 59<br>(32 before, 27 after) | 874<br>(4.54) | 936<br>(5.25) | IRR = 0.73<br>(0.46-1.14)     | .16  | No significant difference between trend in adjusted rate of unplanned transfers post intervention and expected trend based on pre-intervention trajectory | 23 |
| Unplanned transfers to PICU from ward (per 1,000 patient-days)                                      | Agulnik 2017 <sup>71</sup>   | ✓ |   |   | ✓ | Children's Hospital Cardiac Early Warning Score (C-CHEWS) | Guatemala | 1 | Y | N | Oncology unit   | Uncontrolled before-after study (retrospective) | 24<br>(12 before, 12 after) | 157<br>(9.3)  | 130<br>(6.5)  | RR = 0.70<br>(0.56-0.88)<br>† | .003 | <b>Significant reduction in rate of unplanned transfers to PICU, post intervention</b>                                                                    | 19 |

|                                                                                               |                              |   |   |   |              |                                                                    |    |   |   |                 |                                             |                          |                                    |                                     |                         |     |                                                                                                                                                                 |    |
|-----------------------------------------------------------------------------------------------|------------------------------|---|---|---|--------------|--------------------------------------------------------------------|----|---|---|-----------------|---------------------------------------------|--------------------------|------------------------------------|-------------------------------------|-------------------------|-----|-----------------------------------------------------------------------------------------------------------------------------------------------------------------|----|
| Urgent PICU admissions (per 1,000 patient-days)                                               | Parshuram 2018 <sup>65</sup> | ✓ | ✓ | ✓ | Bedside PEWS | Belgium, Ireland, Netherlands, England, Italy, Canada, New Zealand | 21 | Y | N | All in-patients | Cluster randomised trial (prospective)      | 18 (6 pre, 12 post)      | Con: 652 (4.01)<br>Int: 469 (3.62) | Con: 1178 (3.83)<br>Int: 828 (3.29) | RR=0.95 (0.82-1.09)     | .45 | No significant difference in pre and post intervention urgent PICU admission rate between intervention and usual care hospitals                                 | 23 |
| <b>PICU OUTCOMES</b>                                                                          |                              |   |   |   |              |                                                                    |    |   |   |                 |                                             |                          |                                    |                                     |                         |     |                                                                                                                                                                 |    |
| Critical deterioration events after PICU transfer (per 1,000 non-ICU patient-days)            | Bonafide 2014 <sup>62</sup>  | ✓ | ✓ |   | Bedside PEWS | US                                                                 | 1  | Y | N | All in-patients | Interrupted Time Series study (prospective) | 59 (32 before, 27 after) | 260† (1.35)                        | 282† (1.58)                         | IRR = 0.38 (0.20-0.75)  | .01 | Significant downward trend in adjusted rate of critical deterioration events post intervention, compared to expected trend based on pre-intervention trajectory | 23 |
| Mechanical ventilation within 1hr of unplanned PICU transfer (per unplanned transfer to PICU) | Bonafide 2014 <sup>62</sup>  | ✓ | ✓ |   | Bedside PEWS | US                                                                 | 1  | Y | N | All in-patients | Interrupted Time Series study (prospective) | 59 (32 before, 27 after) | 45 (5.1)                           | 42 (4.5)                            | RR = 0.87 (0.58-1.31) † | .51 | No significant difference in unadjusted rate of mechanical ventilation within 1hr of PICU admission, post intervention                                          | 23 |

|                                                                                                 |                             |   |   |   |  |                           |    |   |   |   |                     |                                               |                             |               |               |                               |        |                                                                                                                                                                           |    |
|-------------------------------------------------------------------------------------------------|-----------------------------|---|---|---|--|---------------------------|----|---|---|---|---------------------|-----------------------------------------------|-----------------------------|---------------|---------------|-------------------------------|--------|---------------------------------------------------------------------------------------------------------------------------------------------------------------------------|----|
| Mechanical ventilation within 12hrs of unplanned PICU transfer (per unplanned transfer to PICU) | Bonafide 2014 <sup>62</sup> | ✓ | ✓ |   |  | Bedside PEWS              | US | 1 | Y | N | All in-patients     | Interrupted Time Series study (prospective)   | 59<br>(32 before, 27 after) | 112<br>(12.8) | 103<br>(11.0) | IRR = 0.17<br>(0.07-0.44)     | <0.001 | Significant reduction in adjusted trend of rate of mechanical ventilation within 12hrs of PICU admission, compared to expected trend based on pre-intervention trajectory | 23 |
| Vasopressors within 1hr of unplanned PICU transfer (per unplanned transfer to PICU)             | Bonafide 2014 <sup>62</sup> | ✓ | ✓ |   |  | Bedside PEWS              | US | 1 | Y | N | All in-patients     | Interrupted Time Series study (prospective)   | 59<br>(32 before, 27 after) | 41<br>(4.7)   | 16<br>(1.7)   | RR = 0.36<br>(0.21-0.64)<br>† | <0.001 | Significant reduction in unadjusted rate of vasopressors within 1hr of PICU admission, post intervention                                                                  | 23 |
| Vasopressors within 12hrs of unplanned PICU transfer (per unplanned transfer to PICU)           | Bonafide 2014 <sup>62</sup> | ✓ | ✓ |   |  | Bedside PEWS              | US | 1 | Y | N | All in-patients     | Interrupted Time Series study (prospective)   | 59<br>(32 before, 27 after) | 71<br>(8.1)   | 57<br>(6.1)   | IRR = 0.20<br>(0.06-0.62)     | .006   | Significant reduction in adjusted trend of rate of vasopressors within 12hrs of PICU admission, compared to expected trend based on pre-intervention trajectory           | 23 |
| Invasive ventilation in PICU (per emergency PICU admission)                                     | Sefton 2015 <sup>69</sup>   | ✓ | ✓ | ✓ |  | Modified Bristol PEWT (a) | UK | 1 | Y | N | All PICU admissions | Controlled before-after study (retrospective) | 24<br>(12 before, 12 after) | 118<br>(75.2) | 104<br>(62.7) | RR = 0.83<br>(0.72-0.97)<br>† | .002   | Significant reduction in rate of PICU emergency admissions given invasive ventilation, post intervention                                                                  | 16 |

|                                                                      |                              |   |   |   |                                                           |                                |    |   |   |                               |                                                 |                          |                 |                 |                         |       |                                                                                                            |    |
|----------------------------------------------------------------------|------------------------------|---|---|---|-----------------------------------------------------------|--------------------------------|----|---|---|-------------------------------|-------------------------------------------------|--------------------------|-----------------|-----------------|-------------------------|-------|------------------------------------------------------------------------------------------------------------|----|
| Inotropes in PICU (per emergency PICU admission)                     | Sefton 2015 <sup>69</sup>    | ✓ | ✓ | ✓ | Modified Bristol PEWT (a)                                 | UK                             | 1  | Y | N | All PICU admissions           | Controlled before-after study (retrospective)   | 24 (12 before, 12 after) | 50 (31.8)       | 40 (24.1)       | RR = 0.76 (0.53-1.08) † | .12   | Non-significant trend towards reduced rate of PICU emergency admissions given inotropes, post intervention | 16 |
| Intubation within 24hrs of PICU admission (per 1,000 patient-days)   | Agulnik 2017 <sup>71</sup>   | ✓ |   | ✓ | Children's Hospital Cardiac Early Warning Score (C-CHEWS) | Guatemala                      | 1  | Y | N | Oncology unit                 | Uncontrolled before-after study (retrospective) | 24 (12 before, 12 after) | 11 (0.65)       | 18 (0.90)       | RR=1.38 (0.65-2.92) †   | .46   | No change in rate of PICU admissions receiving intubation within 24 hours, post intervention               | 19 |
| Vasopressors within 24hrs of PICU admission (per 1,000 patient-days) | Agulnik 2017 <sup>71</sup>   | ✓ |   | ✓ | Children's Hospital Cardiac Early Warning Score (C-CHEWS) | Guatemala                      | 1  | Y | N | Oncology unit                 | Uncontrolled before-after study (retrospective) | 24 (12 before, 12 after) | 29 (1.72)       | 37 (1.86)       | RR=1.08 (0.66-1.75) †   | .60   | No change in rate of PICU admissions receiving vasopressors within 24 hours, post intervention             | 19 |
| Mechanical ventilation during PICU admission (per PICU admission)    | Kolovos 2018 <sup>66</sup>   | ✓ | ✓ |   | RRT activation criteria*                                  | US                             | 1  | Y | N | All unplanned PICU admissions | Uncontrolled before-after study (retrospective) | 78 (42 before, 36 after) | 285 (25.98)     | 233 (22.09)     | RR = 0.85 (0.73-0.99) † | .03†  | Significant reduction in rate of PICU admissions receiving mechanical ventilation, post intervention       | 12 |
| Intubation within 1hr of PICU admission (per PICU admission)         | Kolovos 2018 <sup>66</sup>   | ✓ | ✓ |   | RRT activation criteria*                                  | US                             | 1  | Y | N | All unplanned PICU admissions | Uncontrolled before-after study (retrospective) | 78 (42 before, 36 after) | 49 (4.47)       | 88 (8.34)       | RR = 1.87 (1.33-2.62)   | .0003 | Significant increase in rate of PICU admissions intubated within 1hr of admission, post intervention       | 12 |
| Significant clinical deterioration events                            | Parshuram 2018 <sup>65</sup> | ✓ | ✓ | ✓ | Bedside PEWS                                              | Belgium, Ireland, Netherlands, | 21 | Y | N | All in-patients               | Cluster randomised trial (prospective)          | 18 (6 pre, 12 post)      | Con: 144 (0.89) | Con: 259 (0.84) | RR=0.77 (0.61-0.97)     | .03   | Significant reduction in rate of clinical deterioration                                                    | 23 |



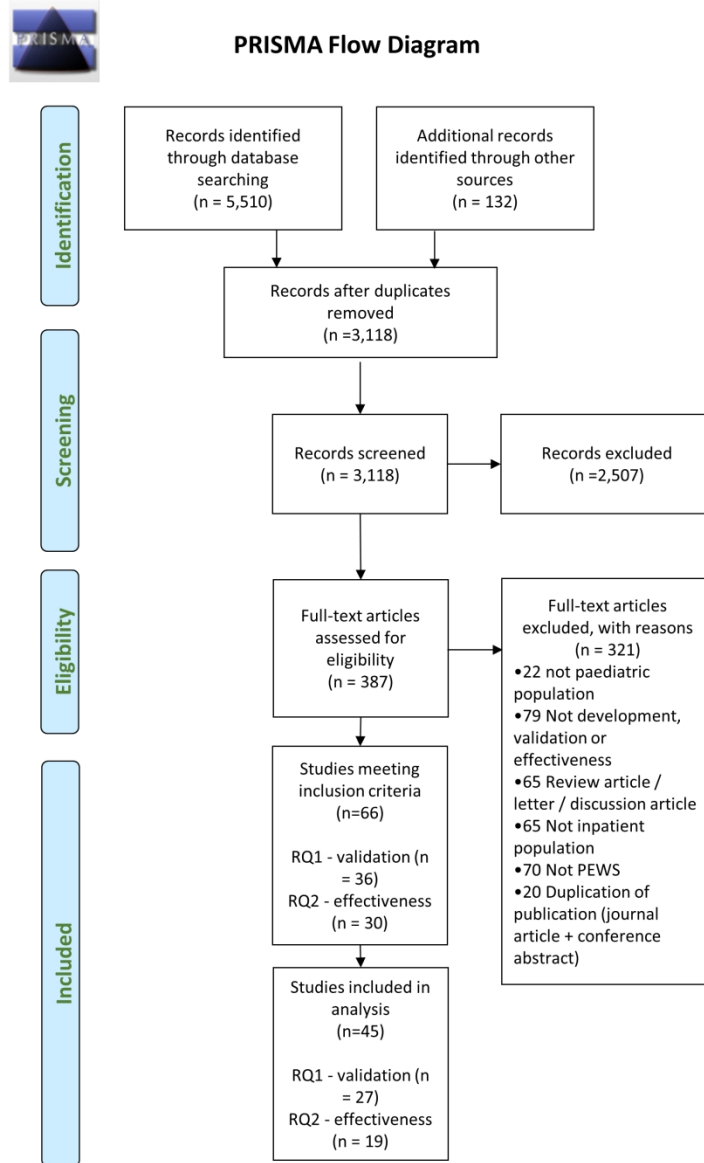

Figure 1: PRISMA flow diagram of study inclusion

190x254mm (300 x 300 DPI)



Supplementary Table 1 – Details of search strategy

Database Search

The search was across a range of databases from their inception to January 2015 then an update was carried out in September 2016 and the second update May 2018.

A preliminary search strategy was developed using a set of key papers known to the group for Ovid Medline using both text words and Medical subject headings. The search strategy was modified according to the indexing systems of the other databases.

| Databases and Database platform                                                 | Original search results<br>January 2015                                         | Update September 2016                                                          | Update May 2018                                                                 |
|---------------------------------------------------------------------------------|---------------------------------------------------------------------------------|--------------------------------------------------------------------------------|---------------------------------------------------------------------------------|
| British Nursing Index (Proquest)                                                | 19                                                                              | 12                                                                             | 25                                                                              |
| CINAHL (Cumulative Index of<br>Nursing and Allied Health Literature)<br>(Ebsco) | 206                                                                             | 17                                                                             | 29                                                                              |
| Cochrane Central Register of<br>Controlled Trials (Wiley)                       | 43                                                                              | 4                                                                              | 30                                                                              |
| EMBASE (OVID)                                                                   | 1065                                                                            | 206                                                                            | 431                                                                             |
| HMIC (Health Management<br>Information Centre) (OVID)                           | 70                                                                              | 1                                                                              | 75                                                                              |
| Medline (OVID)                                                                  | 943                                                                             | 135                                                                            | 328                                                                             |
| Medline in Process (OVID)                                                       | 43                                                                              | 69                                                                             | 45                                                                              |
| Scopus (Elsevier)                                                               | 747                                                                             | 85                                                                             | 234                                                                             |
| Web of Knowledge (Science Science<br>Citation Indexes) (Thomson Reuter)         | 400                                                                             | 82                                                                             | 166                                                                             |
| <b>Total</b>                                                                    | <b>3536</b><br><i>(prior to removing duplicates<br/>and irrelevant studies)</i> | <b>611</b><br><i>(prior to removing duplicates<br/>and irrelevant studies)</i> | <b>1363</b><br><i>(prior to removing duplicates<br/>and irrelevant studies)</i> |

Supplementary search

## PUMA Search Information

### Supplementary search

NB. Restricted each of the below searches by dates: 01/01/2016 – 16/05/2018

| Trials Registers                                                                                                                                                                                    | Hits January 2015 | Update September 2016 | Update June 2018 |
|-----------------------------------------------------------------------------------------------------------------------------------------------------------------------------------------------------|-------------------|-----------------------|------------------|
| ClinicalTrials.gov<br><a href="https://clinicaltrials.gov/">https://clinicaltrials.gov/</a>                                                                                                         | 6                 | 4                     | 0                |
| UK Clinical Trials Gateway<br><a href="http://www.ukctg.nihr.ac.uk/default.aspx">http://www.ukctg.nihr.ac.uk/default.aspx</a>                                                                       | 3 (duplicates)    | 5 (1 duplicate)       | 0                |
| The WHO trial search portal for studies worldwide:<br><a href="http://apps.who.int/trialsearch">http://apps.who.int/trialsearch</a>                                                                 | 1 (duplicate)     | 0                     | 0                |
| Journal site                                                                                                                                                                                        | Hits              |                       |                  |
| Archives of Disease in Childhood<br><a href="http://adc.bmj.com/">http://adc.bmj.com/</a>                                                                                                           | 14                | 4                     | 7                |
| BMJ<br><a href="http://www.bmj.com/theBMJ">http://www.bmj.com/theBMJ</a>                                                                                                                            | 1                 | 0                     | 1                |
| BMJ Quality and safety<br><a href="http://qualitysafety.bmj.com/">http://qualitysafety.bmj.com/</a>                                                                                                 | 7                 | 4                     | 2                |
| JAMA Pediatrics<br><a href="http://archpedi.jamanetwork.com/journal.aspx">http://archpedi.jamanetwork.com/journal.aspx</a>                                                                          | 1                 | 0                     | 0                |
| Journal of Critical Care<br><a href="http://www.jccjournal.org/">http://www.jccjournal.org/</a>                                                                                                     | 3                 | 1                     | 0                |
| Journal of Pediatrics ( American)<br><a href="http://www.jpeds.com/">http://www.jpeds.com/</a>                                                                                                      | 1                 | 0                     | 2                |
| Journal of Paediatrics and Child Health (Australian)<br><a href="http://onlinelibrary.wiley.com/journal/10.1111/(ISSN)1440-1754">http://onlinelibrary.wiley.com/journal/10.1111/(ISSN)1440-1754</a> | 2                 | 2                     | 0                |

|                                                                                                                                                                         |                  |                     |                     |
|-------------------------------------------------------------------------------------------------------------------------------------------------------------------------|------------------|---------------------|---------------------|
| Lancet<br><a href="http://www.thelancet.com/">http://www.thelancet.com/</a>                                                                                             | 0                | 0                   | 0                   |
| New England Journal of Medicine<br><a href="http://www.nejm.org/">http://www.nejm.org/</a>                                                                              | 0                | 0                   | 0                   |
| Pediatrics<br><a href="http://pediatrics.aappublications.org/">http://pediatrics.aappublications.org/</a>                                                               | 6                | 2                   | 0                   |
| Pediatric Critical Care Medicine<br><a href="http://journals.lww.com/pccmjournal/pages/default.aspx">http://journals.lww.com/pccmjournal/pages/default.aspx</a>         | 14               | 6                   | 3                   |
| <b>Websites and organisations</b>                                                                                                                                       | <b>HITS</b>      |                     |                     |
| American Society of Anesthesiologists<br><a href="https://www.asahq.org/">https://www.asahq.org/</a>                                                                    | 1                | 0                   | 0                   |
| American Academy of Pediatrics<br><a href="http://www.aap.org/en-us/Pages/Default.aspx">http://www.aap.org/en-us/Pages/Default.aspx</a>                                 | 1                |                     | 0                   |
| Association of Anaesthetists of Great Britain and Ireland<br><a href="http://www.aagbi.org/">http://www.aagbi.org/</a>                                                  | 0                | 0                   | 0                   |
| Australian Medical Council<br><a href="http://www.amc.org.au/">http://www.amc.org.au/</a>                                                                               | 1                | 0                   | 0                   |
| Royal College of Paediatrics and Child Health<br><a href="http://www.rcpch.ac.uk/">http://www.rcpch.ac.uk/</a>                                                          | 1                | 0                   | 4                   |
| Paediatric Nursing Association Europe<br><a href="http://www.rcn.org.uk/">http://www.rcn.org.uk/</a>                                                                    | 9                |                     | 0                   |
| European Federation of Critical Care Nursing Associations<br><a href="http://www.efccna.org/">http://www.efccna.org/</a>                                                | No Search Option | No Search Option    | No Search Option    |
| Royal Australasian College of Physicians ( Division of Child Health)<br><a href="https://www.racp.edu.au/page/paed-policy">https://www.racp.edu.au/page/paed-policy</a> | 0                | 0                   | 0                   |
| Royal College of Physicians (inclusive of National Clinical Guideline Centre)<br><a href="https://www.rcplondon.ac.uk/">https://www.rcplondon.ac.uk/</a>                | 2                | 0                   | 0                   |
| The NHS Institute for Innovation and Improvement<br><a href="http://www.institute.nhs.uk/">http://www.institute.nhs.uk/</a>                                             | 4                | Site cease to exist | Site cease to exist |
| NICE: Eyes on Evidence                                                                                                                                                  | 4                | 1                   | 1                   |

|                                                                                                                                                                                                   |    |    |    |
|---------------------------------------------------------------------------------------------------------------------------------------------------------------------------------------------------|----|----|----|
| <a href="https://www.evidence.nhs.uk/about-evidence-services/bulletins-and-alerts/eyes-on-evidence">https://www.evidence.nhs.uk/about-evidence-services/bulletins-and-alerts/eyes-on-evidence</a> |    |    |    |
| <b>TOTAL</b>                                                                                                                                                                                      | 82 | 30 | 20 |

**Total = 112**

## Search Strategies

### BNI

"Paediatric Early Warning" OR ("pediatric early warning" OR "pediatric rapid response") OR ("paediatric rapid response" OR "Bedside paediatric early warning") OR ("Pediatric Advanced Warning Score" OR "Paediatric Advanced Warning Score")

### CENTRAL

Search Name: PUMA update

Last Saved: 16/05/2018 11:39:08.703

Description:

| ID  | Search                         |
|-----|--------------------------------|
| #1  | "early warning score*"         |
| #2  | "early warning system*"        |
| #3  | "early warning tool*"          |
| #4  | "VitalPAC Early Warning Score" |
| #5  | "activation criteria"          |
| #6  | "Rapid Response Team"          |
| #7  | "Rapid Response system*"       |
| #8  | "Track and trigger"            |
| #9  | "trigger tools"                |
| #10 | "calling criteria"             |

- 1  
2  
3 #11 "Alert criteria"  
4 #12 "Rapid Response"  
5 #13 #1 or #2 or #3 or #4 or #5 or #6 or #7 or #8 or #9 or #10 or #11 or #12  
6 #14 pediatric\* or paediatric\* or infant\* or child\* or baby or toddler or babies or teen\* or adolescent\*  
7 #15 #13 and #14  
8 #16 "Pediatric Early Warning"  
9 #17 "Paediatric Early Warning"  
10 #18 "p?ediatric alert"  
11 #19 "Pediatric Rapid Response"  
12 #20 "Pediatric Advanced Warning Score\*"  
13 #21 "Paediatric Advanced Warning Score\*"  
14 #22 "infant early warning"  
15 #23 "Bedside PEWS"  
16 #24 "Bedside paediatric early warning"  
17 #25 #16 or #17 or #18 or #19 or #20 or #21 or #22 or #23 or #24  
18 #26 #15 or #25 Publication Year from 2016 to 2018  
19  
20  
21

### CINAHL via EBSCO

| Search ID#                   | Search Terms                                                                                                                                                                                                      |
|------------------------------|-------------------------------------------------------------------------------------------------------------------------------------------------------------------------------------------------------------------|
| <input type="checkbox"/> S11 | S7 OR S10                                                                                                                                                                                                         |
| <input type="checkbox"/> S10 | S1 AND S8                                                                                                                                                                                                         |
| <input type="checkbox"/> S9  | S2 AND S8                                                                                                                                                                                                         |
| <input type="checkbox"/> S8  | S3 AND S4                                                                                                                                                                                                         |
| <input type="checkbox"/> S7  | S5 OR S6                                                                                                                                                                                                          |
| <input type="checkbox"/> S6  | TX "infant early warning" OR TX "bedside PEWS" OR TX "Bedside paediatric early warning"                                                                                                                           |
| <input type="checkbox"/> S5  | TX "p?ediatric early warning system" OR TX "P?ediatric Early Warning" OR TX "p?ediatric early warning score" OR TX "p?ediatric risk of mortality" OR TX "P?ediatric Rapid Response Team" OR TX "P?ediatric alert" |
| <input type="checkbox"/> S4  | AB pediatric* or paediatric* or infant*1 or child* or baby or toddler or babies or teen* or adolescent*                                                                                                           |

- 1  
2  
3  
4  
5  
6  
7  
8  
9  
10  
11
- S3 TX "track-and-trigger" OR TX "VitalPAC Early Warning Score" OR TX "activation criteria". OR TX "trigger tool\*" OR TX "Rapid Response" OR TX "activation criteria". OR TX "early warning" OR TX "Alert criteria" OR TX outreach N3 emergency
  - S2 Detecting W3 deterioration
  - S1 "early warning"

## DARE

(Paediatric early warning) OR (pediatric early warning) OR (Paediatric Rapid Response) IN DARE  
( early warning) OR (track-and-trigger system) OR ( Rapid Response) IN DARE  
(emergency team) AND (early warning) IN DARE

## Embase

Database: EMBASE <1947-Present>

Search Strategy:

- 
- 1 ("early warning" adj5 scor\*).ab,ti. (568)
  - 2 ("early warning" adj5 system\* adj5 (deteriorat\* or mortality or death or outcome\* or harm\* or safety)).ab,ti. (51)
  - 3 "acute illness severity".mp. (38)
  - 4 early intervention/ and ((prevent\* or reduc\* or improv\*) adj5 (deteriorat\* or mortality or death or outcome\* or harm\* or safety)).ab,ti. (1185)
  - 5 ("early medical intervention" adj5 (tool\* or scor\* or index\* or indicator\* or indice\* or assessment\* or guide\* or instrument\* or criteria or parameter\* or deteriorat\* or mortality or death or monitor\* or outcome\* or harm\* or safety)).ab,ti. (10)
  - 6 \*"severity of illness index"/ and ((tool\* or scor\* or index\* or indicator\* or indice\* or assessment\* or instrument\* or criteria or parameter\*) adj5 ((prevent\* or reduc\* or improv\*) adj5 (deteriorat\* or mortality or death or outcome\* or harm\* or safety))).ab,ti. (3)
  - 7 exp Health Status Indicators/ and ((tool\* or scor\* or index\* or indicator\* or indice\* or assessment\* or instrument\* or criteria or parameter\*) adj3 ((prevent\* or reduc\* or improv\*) adj3 (deteriorat\* or mortality or death or outcome\* or harm\* or safety))).ab,ti. (7)
  - 8 rapid response team/ (849)
  - 9 "alarm monitor"/ and (prevent\* or reduc\* or improv\*).mp. (245)
  - 10 ("clinical alarm" adj5 (prevent\* or reduc\* or improv\*)).mp. (2)
  - 11 (outreach adj3 emergency).tw. (46)
  - 12 VitalPAC Early Warning Score.tw. (15)
  - 13 medical emergency team.tw. (395)
  - 14 Rapid Response Systems.mp. (140)

1  
2  
3  
4  
5  
6  
7  
8  
9  
10  
11  
12  
13  
14  
15  
16  
17  
18  
19  
20  
21  
22  
23  
24  
25  
26  
27  
28  
29  
30  
31  
32  
33  
34  
35  
36  
37  
38  
39  
40  
41  
42  
43  
44  
45  
46

- 15 ("rapid response" adj5 (prevent\* or reduc\* or improv\*)).tw. (191)  
16 ("medical device" adj3 (prevent\* or reduc\* or improv\*)).mp. (187)  
17 (((Detecting or managing) adj3 deterioration) and warning).tw. (11)  
18 track-and-trigger system.tw. (24)  
19 (Track adj trigger).tw. (4)  
20 (Track and trigger).tw. (241)  
21 trigger tools.tw. (47)  
22 ("alert criteria" or "activation criteria" or "calling criteria").tw. (209)  
23 SBAR technique\*.mp. (5)  
24 (score adj3 severity of illness).tw. (393)  
25 or/1-24 (4295)  
26 limit 25 to (infant <to one year> or child <unspecified age> or preschool child <1 to 6 years> or school child <7 to 12 years> or adolescent <13 to 17 years>) (533)  
27 P?ediatric Early Warning.mp. (120)  
28 p?ediatric alert.tw. (7)  
29 p?ediatric early warning systems.mp. (4)  
30 p?ediatric risk of mortality.tw. (527)  
31 P?ediatric Rapid Response Team.tw. (14)  
32 Point-of-Care Systems/ and ((paediatric or pediatric) adj3 (improve or identify or detect\* or outcome or early or critical or emergency)).tw. (23)  
33 P?ediatric Advanced Warning Score.tw. (3)  
34 neonatal early warning.tw. (1)  
35 infant early warning.tw. (0)  
36 p?ediatric rapid response.tw. (31)  
37 Bedside paediatric early warning.tw. (5)  
38 Bedside PEWS.tw. (7)  
39 or/27-38 (707)  
40 26 or 39 (1155)  
41 limit 40 to human (1065)

**HMIC**

Database: HMIC Health Management Information Consortium

Search Strategy:  
-----

- 1 ("early warning" adj5 scor\*).ab,ti. (23)
- 2 ("early warning" adj5 system\* adj5 (deteriorat\* or mortality or death or outcome\* or harm\* or safety)).ab,ti. (6)
- 3 "acute illness severity".mp. (3)
- 4 "early medical intervention"/ and ((prevent\* or reduc\* or improv\*) adj5 (deteriorat\* or mortality or death or outcome\* or harm\* or safety)).ab,ti. (0)
- 5 ("early medical intervention" adj5 (tool\* or scor\* or index\* or indicator\* or indice\* or assessment\* or guide\* or instrument\* or criteria or parameter\* or deteriorat\* or mortality or death or monitor\* or outcome\* or harm\* or safety)).ab,ti. (0)
- 6 Health Status Indicators.mp. and ((tool\* or scor\* or index\* or indicator\* or indice\* or assessment\* or instrument\* or criteria or parameter\*) adj3 ((prevent\* or reduc\* or improv\*) adj3 (deteriorat\* or mortality or death or outcome\* or harm\* or safety))).ab,ti. (0)
- 7 exp "Severity of illness index"/ and ((tool\* or scor\* or index\* or indicator\* or indice\* or assessment\* or instrument\* or criteria or parameter\*) adj5 ((prevent\* or reduc\* or improv\*) adj5 (deteriorat\* or mortality or death or outcome\* or harm\* or safety))).ab,ti. (0)
- 8 "activation criteria".ab,ti. (2)
- 9 exp Rapid response teams/ (39)
- 10 Clinical Alarms.mp. (0)
- 11 (outreach adj3 emergency).tw. (2)
- 12 VitalPAC Early Warning Score.tw. (0)
- 13 medical emergency team.tw. (15)
- 14 Rapid Response Systems.mp. (8)
- 15 Rapid Response Team.tw. (27)
- 16 ((Detecting or managing) adj3 deterioration).tw. (1)
- 17 track-and-trigger system.tw. (2)
- 18 (Track adj trigger).tw. (1)
- 19 (Track and trigger).tw. (8)
- 20 trigger tools.tw. (4)
- 21 Calling criteria.tw. (1)
- 22 Alert criteria.mp. (1)
- 23 Rapid response.tw. (111)
- 24 (score adj3 severity of illness).tw. (3)
- 25 or/1-24 (171)
- 26 (pediatric\* or paediatric\* or infant\*1 or child\* or baby or toddler or babies or teen\* or adolescent\*).mp. (40161)
- 27 25 and 26 (14)
- 28 p?ediatric alert.tw. (0)
- 29 p?ediatric early warning systems.mp. (1)
- 30 p?ediatric risk of mortality.tw. (4)



- 1  
2  
3 31 Pediatric Rapid Response Team.tw. (0)  
4 32 Point-of-Care.mp. and ((paediatric or pediatric) adj3 (improve or identify or detect\* or outcome or early or critical or emergency)).tw. (0)  
5 33 Pediatric Advanced Warning Score.tw. (0)  
6 34 neonatal early warning.tw. (0)  
7 35 infant early warning.tw. (0)  
8 36 paediatric rapid response.tw. (1)  
9 37 pediatric rapid response.tw. (0)  
10 38 Bedside paediatric early warning.tw. (0)  
11 39 Bedside PEWS.tw. (0)  
12 40 p?ediatric early warning.mp. (2)  
13 41 care.mp. and ((paediatric or pediatric) adj3 (improve or identify or detect\* or outcome or early or critical or emergency)).tw. [mp=title, other title,  
14 abstract, heading words] (57)  
15 42 or/28-41 (59)  
16 43 27 or 42 (70)  
17  
18  
19  
20

## 21 Medline

22 Database: Ovid MEDLINE(R) <1946 to January Week 2 2015>

23 Search Strategy:  
24 -----

- 25  
26 1 ("early warning" adj5 scor\*).ab,ti. (260)  
27 2 ("early warning" adj5 system\* adj5 (deteriorat\* or mortality or death or outcome\* or harm\* or safety)).ab,ti. (24)  
28 3 "acute illness severity".mp. (21)  
29 4 "early medical intervention"/ and ((prevent\* or reduc\* or improv\*) adj5 (deteriorat\* or mortality or death or outcome\* or harm\* or safety)).ab,ti. (99)  
30 5 ("early medical intervention" adj5 (tool\* or scor\* or index\* or indicator\* or indice\* or assessment\* or guide\* or instrument\* or criteria or parameter\*  
31 or deteriorat\* or mortality or death or monitor\* or outcome\* or harm\* or safety)).ab,ti. (7)  
32 6 exp Health Status Indicators/ and ((tool\* or scor\* or index\* or indicator\* or indice\* or assessment\* or instrument\* or criteria or parameter\*) adj3  
33 ((prevent\* or reduc\* or improv\*) adj3 (deteriorat\* or mortality or death or outcome\* or harm\* or safety))).ab,ti. (166)  
34 7 "Severity of Illness Index"/ and ((tool\* or scor\* or index\* or indicator\* or indice\* or assessment\* or instrument\* or criteria or parameter\*) adj5  
35 ((prevent\* or reduc\* or improv\*) adj5 (deteriorat\* or mortality or death or outcome\* or harm\* or safety))).ab,ti. (274)  
36 8 exp Hospitals/ and ((Detecting or managing) adj3 deterioration).tw. (2)  
37 9 ("medical device" adj3 (prevent\* or reduc\* or improv\*)).mp. (58)  
38 10 ("alert criteria" or "activation criteria" or "calling criteria").tw. (121)  
39  
40  
41  
42  
43  
44  
45  
46

- 1  
2  
3 11 Hospital Rapid Response Team/ (334)  
4 12 Clinical Alarms/ (332)  
5 13 (outreach adj3 emergency).tw. (32)  
6 14 VitalPAC Early Warning Score.tw. (10)  
7 15 medical emergency team.tw. (247)  
8 16 Rapid Response Systems.mp. (87)  
9 17 Rapid Response Team.tw. (185)  
10 18 (((Detecting or managing) adj3 deterioration) and warning).tw. (8)  
11 19 track-and-trigger system.tw. (14)  
12 20 (Track adj trigger).tw. (2)  
13 21 (Track and trigger).tw. (137)  
14 22 trigger tools.tw. (22)  
15 23 SBAR technique\*.mp. (3)  
16 24 ("rapid response" adj5 (prevent\* or reduc\* or improv\*)).tw. (117)  
17 25 (score adj3 severity of illness).tw. (243)  
18 26 or/1-25 (2286)  
19 27 limit 26 to (humans and "all child (0 to 18 years)") (453)  
20 28 P?ediatric Early Warning.mp. (38)  
21 29 p?ediatric alert.tw. (5)  
22 30 p?ediatric early warning systems.mp. (3)  
23 31 p?ediatric risk of mortality.tw. (400)  
24 32 P?ediatric Rapid Response Team.tw. (6)  
25 33 Point-of-Care Systems/ and ((paediatric or pediatric) adj3 (improve or identify or detect\* or outcome or early or critical or emergency)).tw. (79)  
26 34 P?ediatric Advanced Warning Score.tw. (2)  
27 35 neonatal early warning.tw. (0)  
28 36 infant early warning.tw. (0)  
29 37 p?ediatric rapid response.tw. (20)  
30 38 Bedside paediatric early warning.tw. (2)  
31 39 Bedside PEWS.tw. (2)  
32 40 or/28-39 (542)  
33 41 27 or 40 (943)  
34  
35  
36  
37  
38

### Scopus

1  
2  
3  
4  
5  
6  
7  
8  
9  
10  
11  
12  
13  
14  
15  
16  
17  
18  
19  
20  
21  
22  
23  
24  
25  
26  
27  
28  
29  
30  
31  
32  
33  
34  
35  
36  
37  
38  
39  
40  
41  
42  
43  
44  
45  
46

( TITLE-ABS-KEY ( "Paediatric Early Warning" OR "Pediatric Early Warning" OR "Pediatric Advanced Warning Score" OR "Paediatric Advanced Warning Score" OR "neonatal early warning" OR "infant early warning" OR "pediatric rapid response" OR "Paediatric rapid response" ) ) OR ( ( ( TITLE-ABS-KEY ( "early warning" W/5 scor\* ) ) OR ( TITLE-ABS-KEY ( "Rapid Response" ) ) OR ( TITLE-ABS-KEY ( "track-and-trigger system" ) ) OR ( TITLE-ABS-KEY ( "track and trigger" ) ) OR ( TITLE-ABS-KEY ( "trigger tool\*" ) ) OR ( TITLE-ABS-KEY ( "alert criteria" ) ) OR ( TITLE-ABS-KEY ( "activation criteria" ) ) OR ( TITLE-ABS-KEY ( "VitalPAC Early Warning Score" ) ) ) ) AND ( TITLE-ABS-KEY ( pediatric\* OR paediatric\* OR infant\* OR child\* OR baby OR toddler OR babies OR teen\* OR adolescent\* ) ) ) AND ( LIMIT-TO ( SUBJAREA , "MEDI" ) OR LIMIT-TO ( SUBJAREA , "NURS" ) OR LIMIT-TO ( SUBJAREA , "NEUR" ) )

**Web of Science**

- # [400](#) #17 OR #1
- 19 **Refined by:** [excluding] **WEB OF SCIENCE CATEGORIES:** ( PARASITOLOGY OR PUBLIC ENVIRONMENTAL OCCUPATIONAL HEALTH OR BIOCHEMISTRY MOLECULAR BIOLOGY OR OPTICS OR HEALTH CARE SCIENCES SERVICES OR MYCOLOGY OR MANAGEMENT OR LINGUISTICS OR INSTRUMENTS INSTRUMENTATION OR MICROBIOLOGY OR INFORMATION SCIENCE LIBRARY SCIENCE OR MATHEMATICAL COMPUTATIONAL BIOLOGY OR GERIATRICS GERONTOLOGY OR ENGINEERING BIOMEDICAL OR FOOD SCIENCE TECHNOLOGY OR ENVIRONMENTAL STUDIES OR ENGINEERING ENVIRONMENTAL OR ENGINEERING ELECTRICAL ELECTRONIC OR HEALTH POLICY SERVICES OR TOXICOLOGY OR EDUCATION EDUCATIONAL RESEARCH OR NUTRITION DIETETICS OR SUBSTANCE ABUSE OR ECONOMICS OR MEDICINE RESEARCH EXPERIMENTAL OR STATISTICS PROBABILITY OR DEVELOPMENTAL BIOLOGY OR MEDICAL INFORMATICS OR SOCIOLOGY OR DENTISTRY ORAL SURGERY MEDICINE OR PSYCHOLOGY EXPERIMENTAL OR COMPUTER SCIENCE ARTIFICIAL INTELLIGENCE OR METEOROLOGY ATMOSPHERIC SCIENCES OR CHEMISTRY ANALYTICAL OR MEDICAL LABORATORY TECHNOLOGY OR CELL BIOLOGY OR DEMOGRAPHY OR BUSINESS FINANCE OR COMPUTER SCIENCE INTERDISCIPLINARY APPLICATIONS OR AUDIOLOGY SPEECH LANGUAGE PATHOLOGY OR PSYCHOLOGY DEVELOPMENTAL OR COMPUTER SCIENCE INFORMATION SYSTEMS OR PLANNING DEVELOPMENT )  
Indexes=SCI-EXPANDED, SSCI, CPCI-S, CPCI-SSH Timespan=1900-2015
- # [499](#) #17 OR #1
- 18 Indexes=SCI-EXPANDED, SSCI, CPCI-S, CPCI-SSH Timespan=1900-2015
- # [487](#) #16 AND #15

- 1  
2  
3  
4  
5  
6  
7  
8  
9  
10  
11  
12  
13  
14  
15  
16  
17  
18  
19  
20  
21  
22  
23  
24  
25  
26  
27  
28  
29  
30  
31  
32  
33  
34  
35  
36  
37  
38  
39  
40  
41  
42  
43  
44  
45  
46
- 17 Indexes=SCI-EXPANDED, SSCI, CPCI-S, CPCI-SSH Timespan=1900-2015
- # [8,044](#) #14 OR #13 OR #12 OR #11 OR #10 OR #9 OR #8 OR #7 OR #6 OR #5 OR #4 OR #3 OR #2
- 16 Indexes=SCI-EXPANDED, SSCI, CPCI-S, CPCI-SSH Timespan=1900-2015
- # [1,689,232](#) **TOPIC:** (( pediatric\* OR paediatric\* OR infant\* OR child\* OR baby OR toddler OR babies OR teen\* OR adolescent\*))
- 15 Indexes=SCI-EXPANDED, SSCI, CPCI-S, CPCI-SSH Timespan=1900-2015
- # [130](#) **TOPIC:** ("Severity of Illness Index" and ((tool\* or scor\* or index\* or indicator\* or indice\* or assessment\* or instrument\* or criteria or parameter\*) SAME ((prevent\* or reduc\* or improv\*) SAME (deteriorat\* or mortality or death or outcome\* or harm\* or safety))))
- 14 Indexes=SCI-EXPANDED, SSCI, CPCI-S, CPCI-SSH Timespan=1900-2015
- # [63](#) **TOPIC:** (("early medical intervention" SAME (tool\* or scor\* or index\* or indicator\* or indice\* or assessment\* or guide\* or instrument\* or criteria or parameter\* or deteriorat\* or mortality or death or monitor\* or outcome\* or harm\* or safety)))
- 13 Indexes=SCI-EXPANDED, SSCI, CPCI-S, CPCI-SSH Timespan=1900-2015
- # [28](#) **TOPIC:** ("early medical intervention" and ((prevent\* or reduc\* or improv\*) SAME (deteriorat\* or mortality or death or outcome\* or harm\* or safety)))
- 12 Indexes=SCI-EXPANDED, SSCI, CPCI-S, CPCI-SSH Timespan=1900-2015
- # [1,206](#) **TOPIC:** ("early warning" SAME system\* SAME (deteriorat\* or mortality or death or outcome\* or harm\* or safety))
- 11 Indexes=SCI-EXPANDED, SSCI, CPCI-S, CPCI-SSH Timespan=1900-2015
- # [2](#) **TOPIC:** ("SBAR technique")
- 10 Indexes=SCI-EXPANDED, SSCI, CPCI-S, CPCI-SSH Timespan=1900-2015
- # [7](#) **TOPIC:** ("VitalPAC Early Warning Score")
- 9 Indexes=SCI-EXPANDED, SSCI, CPCI-S, CPCI-SSH Timespan=1900-2015
- # [123](#) **TOPIC:** ("activation criteria")
- 8 Indexes=SCI-EXPANDED, SSCI, CPCI-S, CPCI-SSH Timespan=1900-2015
- # [16](#) TS=("alert criteria")
- 7 Indexes=SCI-EXPANDED, SSCI, CPCI-S, CPCI-SSH Timespan=1900-2015
- # [159](#) TS=("trigger tool\*")
- 6 Indexes=SCI-EXPANDED, SSCI, CPCI-S, CPCI-SSH Timespan=1900-2015
- # [45](#) TS=("track and trigger")

1  
2  
3  
4  
5  
6  
7  
8  
9  
10  
11  
12  
13  
14  
15  
16  
17  
18  
19  
20  
21  
22  
23  
24  
25  
26  
27  
28  
29  
30  
31  
32  
33  
34  
35  
36  
37  
38  
39  
40  
41  
42  
43  
44  
45  
46

5 Indexes=SCI-EXPANDED, SSCI, CPCI-S, CPCI-SSH Timespan=1900-2015  
 # [15](#) TS=("track-and-trigger system")  
 4 Indexes=SCI-EXPANDED, SSCI, CPCI-S, CPCI-SSH Timespan=1900-2015  
 # [6,100](#) TS=("Rapid Response")  
 3 Indexes=SCI-EXPANDED, SSCI, CPCI-S, CPCI-SSH Timespan=1900-2015  
 # [604](#) TS=("early warning" SAME scor\*)  
 2 Indexes=SCI-EXPANDED, SSCI, CPCI-S, CPCI-SSH Timespan=1900-2015  
 # [88](#) TS=("Paediatric Early Warning" OR "Pediatic Early Warning" OR "Pediatic Advanced Warning Score"  
 1 OR "Paediatric Advanced Warning Score" OR "neonatal early warning" OR "infant early warning" OR  
 "pediatric rapid response" OR "Paedatric rapid response")  
 Indexes=SCI-EXPANDED, SSCI, CPCI-S, CPCI-SSH Timespan=1900-2015

**PUMA Supplementary searches**

**Search terms to use:**

- "Pediatric Early warning"
- "Paediatric Early warning"
- "Pediatric Rapid Response Team"
- "Paediatric Rapid Response Team"
- PEWS
- "Paediatric trigger tools"
- "Pediatric trigger tools"

Supplementary Table 2 - PICOS criteria for inclusion of studies

## Question 1 – development / validation studies

| Parameter           | Inclusion criteria                                                                                                                                | Exclusion criteria                                                       |
|---------------------|---------------------------------------------------------------------------------------------------------------------------------------------------|--------------------------------------------------------------------------|
| <i>Patients</i>     | Children aged 0-18 who are in-patients in a hospital                                                                                              | Adult patients; children in emergency departments or neonatal unit       |
| <i>Intervention</i> | Development or validation of a PTTT                                                                                                               | Acuity or triage tools, tools developed for use in emergency departments |
| <i>Comparator</i>   | Not applicable                                                                                                                                    |                                                                          |
| <i>Outcomes</i>     | Mortality and critical events including: arrests, code calls, transfer to higher level of care (e.g., ICU/HDU), senior review, RRT/MET activation |                                                                          |
| <i>Study design</i> | Chart or case reviews; cohort studies; case-control studies, observational studies                                                                | Reviews, editorials or opinion pieces                                    |

## Question 2 – effectiveness studies

| Parameter           | Inclusion criteria                                                                                                                                                                                                                                                        | Exclusion criteria                                                                                                                                        |
|---------------------|---------------------------------------------------------------------------------------------------------------------------------------------------------------------------------------------------------------------------------------------------------------------------|-----------------------------------------------------------------------------------------------------------------------------------------------------------|
| <i>Patients</i>     | Children aged 0-18 who are in-patients in a hospital                                                                                                                                                                                                                      | Adult patients<br>Children in emergency departments or neonatal unit                                                                                      |
| <i>Intervention</i> | Implementation of any 'paediatric early warning system' intervention (with or without a PTTT) – including implementing a new PTTT, RRT/MET implementation, educational initiatives or communications tools aimed at improving identification of deteriorating in-patients | Acuity or triage tools, tools developed for use in emergency departments, interventions whose purpose was not identification of deteriorating in-patients |
| <i>Comparator</i>   | Not applicable                                                                                                                                                                                                                                                            |                                                                                                                                                           |
| <i>Outcomes</i>     | Mortality and critical events including: arrests, code calls, transfer to higher level of care (e.g., ICU/HDU), senior review, RRT/MET activation                                                                                                                         |                                                                                                                                                           |
| <i>Study design</i> | Randomised controlled trials, non-randomised controlled trials, before-after studies (controlled or uncontrolled); interrupted time series studies                                                                                                                        | Reviews, editorials or opinion pieces                                                                                                                     |

Supplementary Table 3 – Template Quality Assessment Forms

## QUALITY ASSESSMENT FOR DEVELOPMENT AND VALIDATION STUDIES

| Criteria     | Yes (2)                                                                 | Partial (1)                                                                                          | No (0)                                                                                                                                 | N/A                                                                     | Score                                     |
|--------------|-------------------------------------------------------------------------|------------------------------------------------------------------------------------------------------|----------------------------------------------------------------------------------------------------------------------------------------|-------------------------------------------------------------------------|-------------------------------------------|
| 1            | Is the hypothesis / aim / objective of the study clearly described?     | Easily identified in introduction / method.                                                          | Vague / incomplete or found in other parts of paper (than introduction/method)                                                         | Aim / Objective no reported                                             |                                           |
| 2            | Was the score developed comprehensively?                                | Evidence base / Expert opinion / Delphi method                                                       | Decided within research team                                                                                                           | No info / unclear                                                       |                                           |
| 3            | Are the characteristics of the patients in the study clearly described? | Reproducible criteria used to categorise participants                                                | Poorly define criteria / incomplete information                                                                                        | No baseline / demographic info                                          |                                           |
| 4            | Is the study design well described and appropriate?                     | Well described, easy to find in paper                                                                | Design not clearly described / design only partially answers the question                                                              | Design poorly described or does not answer study question               |                                           |
| 5            | Are the study sample representative of the intended population?         | A full description of the target population is given with the sample selected in a non-biased manner | Sample selected from a known population however, selection strategy likely introduces bias but not enough to seriously distort results | Sample recruited from an unknown population in an opportunistic fashion |                                           |
| 6            | Are population characteristics controlled for and adequately described? | Appropriate control at design/analysis stage                                                         | Incomplete control/description or not considered but unlikely to seriously influence results                                           | Not controlled for and likely to seriously influence results            |                                           |
| 7            | Was compliance/use of the PEWS reliable?                                | Compliance / use was well described and reliably implemented                                         | Compliance / use was not well described or not reliably implemented                                                                    | Compliance / use was not reported                                       |                                           |
| 8            | Was consideration given for data collected at different times / sites   | Well described reason why data was collected at different time points                                | Data was collected at different times due to specific opportunity                                                                      | No explanation for data collection at different time points             | Data was collected at the same time point |
| 9            | Are the main findings clearly described?                                | Simple outcome data reported for all major findings                                                  | Incomplete or inappropriate descriptive statistics                                                                                     | No/inadequate descriptive statistics                                    |                                           |
| 10           | Are methods of analysis adequately described and appropriate?           | Described and appropriate                                                                            | Not reported but probably appropriate or some tests appropriate, some not                                                              | Methods not described and cannot be determined                          |                                           |
| 11           | Are the conclusions supported by the results                            | All conclusions supported by data                                                                    | Some of the major conclusions are supported by the data; some are not or speculative interpretations are not indicated as such         | None/few of major conclusions supported by the data                     |                                           |
| 12           | How was missing data handled                                            | Missing data was reported and handled appropriately                                                  | Missing data was reported but unable to determine how it was handled or it wasn't handled appropriately                                | Missing data was not reported                                           | No missing data                           |
| <b>Total</b> |                                                                         |                                                                                                      |                                                                                                                                        |                                                                         |                                           |

MAX. Score: 24

## QUALITY ASSESSMENT FOR EFFECTIVENESS STUDIES

| Criteria     | Yes (2)                                                                 | Partial (1)                                                                                          | No (0)                                                                                                                                 | N/A                                                                     | Score                                     |
|--------------|-------------------------------------------------------------------------|------------------------------------------------------------------------------------------------------|----------------------------------------------------------------------------------------------------------------------------------------|-------------------------------------------------------------------------|-------------------------------------------|
| 1            | Is the hypothesis / aim / objective of the study clearly described?     | Easily identified in introduction / method.                                                          | Vague / incomplete or found in other parts of paper (than introduction/method)                                                         | Aim / Objective no reported                                             |                                           |
| 2            | Was the score developed comprehensively?                                | Evidence base / Expert opinion / Delphi method                                                       | Decided within research team                                                                                                           | No info / unclear                                                       |                                           |
| 3            | Are the characteristics of the patients in the study clearly described? | Reproducible criteria used to categorise participants                                                | Poorly define criteria / incomplete information                                                                                        | No baseline / demographic info                                          |                                           |
| 4            | Is the study design well described and appropriate?                     | Well described, easy to find in paper                                                                | Design not clearly described / design only partially answers the question                                                              | Design poorly described or does not answer study question               |                                           |
| 5            | Are the study sample representative of the intended population?         | A full description of the target population is given with the sample selected in a non-biased manner | Sample selected from a known population however, selection strategy likely introduces bias but not enough to seriously distort results | Sample recruited from an unknown population in an opportunistic fashion |                                           |
| 6            | Was the PEWS well implemented?                                          | Implementation was well reported and appropriately applied                                           | Implementation was not well reported or not appropriate                                                                                | No info / unclear                                                       |                                           |
| 7            | Are population characteristics controlled for and adequately described? | Appropriate control at design/analysis stage                                                         | Incomplete control/description or not considered but unlikely to seriously influence results                                           | Not controlled for and likely to seriously influence results            |                                           |
| 8            | Was compliance/use of the PEWS reliable?                                | Compliance / use was well described and reliably implemented                                         | Compliance / use was not well described or not reliably implemented                                                                    | Compliance / use was not reported                                       |                                           |
| 9            | Was consideration given for data collected at different times / sites   | Well described reason why data was collected at different time points                                | Data was collected at different times due to specific opportunity                                                                      | No explanation for data collection at different time points             | Data was collected at the same time point |
| 10           | Are the main findings clearly described?                                | Simple outcome data reported for all major findings                                                  | Incomplete or inappropriate descriptive statistics                                                                                     | No/inadequate descriptive statistics                                    |                                           |
| 11           | Are methods of analysis adequately described and appropriate?           | Described and appropriate                                                                            | Not reported but probably appropriate or some tests appropriate, some not                                                              | Methods not described and cannot be determined                          |                                           |
| 12           | Are the conclusions supported by the results                            | All conclusions supported by data                                                                    | Some of the major conclusions are supported by the data; some are not or speculative interpretations are not indicated as such         | None/few of major conclusions supported by the data                     |                                           |
| 13           | How was missing data handled                                            | Missing data was reported and handled appropriately                                                  | Missing data was reported but unable to determine how it was handled or it wasn't handled appropriately                                | Missing data was not reported                                           | No missing data                           |
| <b>Total</b> |                                                                         |                                                                                                      |                                                                                                                                        |                                                                         |                                           |

**MAX. Score: 26**



Supplementary Table 4 –Validation papers excluded from analysis

| PTTT                                                      | Refs                        | Country | Study population                            | Study design                       | Number of centres | PTTT used in practice? | Internal / external validation study? | Outcome measures                                  | Sample size     | Score or trigger? | Study overview and reason for exclusion from validation results                                                                                                                                                                                                                                                                                                                                                                                                                                                                                     | Quality score (max = 24) |
|-----------------------------------------------------------|-----------------------------|---------|---------------------------------------------|------------------------------------|-------------------|------------------------|---------------------------------------|---------------------------------------------------|-----------------|-------------------|-----------------------------------------------------------------------------------------------------------------------------------------------------------------------------------------------------------------------------------------------------------------------------------------------------------------------------------------------------------------------------------------------------------------------------------------------------------------------------------------------------------------------------------------------------|--------------------------|
| Modified Brighton PEWS (a)                                | Garlick 2013 <sup>20</sup>  | US      | All in-patients (MET calls only)            | Case-control study (retrospective) | 1                 | N                      | Ext                                   | Transfer to PICU                                  | 267 (116 cases) | S                 | Describes review of MET calls (n=267) to evaluate predictive ability of Modified Brighton PEWS tool for identifying children requiring transfer to PICU (n=116). Results presented in terms of association between PEWS and odds of transfer to higher level of care – no evaluation of performance characteristics such as AUROC, sensitivity or specificity.                                                                                                                                                                                      | 8                        |
|                                                           | Medar 2015 <sup>21</sup>    | Unclear | RRT calls only                              | Chart review (retrospective)       | 1                 | NR                     | Ext                                   | RRT call                                          | 61              | S                 | Describes retrospective review of RRT calls (n=61) to evaluate Modified Brighton PEWS at time of admission and time of RRT call. Report higher median PEWS score for patients at time of RRT call compared to admission. No evaluation of performance characteristics such as AUROC, sensitivity or specificity.                                                                                                                                                                                                                                    | 6                        |
| Texas Children's Hospital (TCH) PAWS                      | Bell 2013 <sup>22</sup>     | US      | General medical ward & two specialist units | Chart review (retrospective)       | 1                 | Y                      | Int                                   | Other validated scales (e.g., Glasgow Coma Scale) | 150             | S                 | Describes development and implementation of the TCH PAWS tool in three wards of a specialist paediatric unit in the US. TCH PAWS amended locally from the Brighton PEWS. Reports on internal reliability (correlation coefficients between 3 categories of the score) and inter-rater reliability of scoring among nurses. Also compares scores on sub-categories to other measures, e.g., the Behavioural sub-score is compared to the Glasgow Coma Scale. No evaluation of performance characteristics such as AUROC, sensitivity or specificity. | 12                       |
| Cardiac Children's Hospital Early Warning Score (C-CHEWS) | McLellan 2013 <sup>23</sup> | US      | Cardiac unit                                | Tool development                   | 1                 | Y                      | Int                                   | Cardiac ICU transfer                              | 27              | S                 | Describes the development and implementation of a modified version of the Children's Hospital Early Warning score for cardiac patients. Results focus on tool modification and implementation challenges – no evaluation of performance characteristics such as AUROC, sensitivity or specificity. Validation of the tool described in a separate paper.                                                                                                                                                                                            | 9                        |
| Burn-specific PEWS                                        | Rahman 2014 <sup>24</sup>   | US      | Specialist burn unit                        | Chart review (retrospective)       | 1                 | Y                      | Int                                   | Burn injuries                                     | 50              | S                 | Conference abstract only. Describes development and implementation of a modified version of the Brighton PEWS, for use with in-patients with burn injuries. Analysis of 50 randomly selected charts – results focus on compliance with scoring and relationship between PTTT score and extent of burn injuries. No evaluation of performance characteristics such as AUROC, sensitivity or specificity.                                                                                                                                             | 13                       |

|   |                                                                                                                                                                                                                                                                                                                                                                                                                               |                              |       |                                                |                                    |   |   |     |                                                                          |                 |   |                                                                                                                                                                                                                                                                                                                                                                                                                                                                                                                                                                                                |    |
|---|-------------------------------------------------------------------------------------------------------------------------------------------------------------------------------------------------------------------------------------------------------------------------------------------------------------------------------------------------------------------------------------------------------------------------------|------------------------------|-------|------------------------------------------------|------------------------------------|---|---|-----|--------------------------------------------------------------------------|-----------------|---|------------------------------------------------------------------------------------------------------------------------------------------------------------------------------------------------------------------------------------------------------------------------------------------------------------------------------------------------------------------------------------------------------------------------------------------------------------------------------------------------------------------------------------------------------------------------------------------------|----|
| 1 | Bedside PEWS                                                                                                                                                                                                                                                                                                                                                                                                                  | Hopkins 2013 <sup>25</sup>   | US    | All in-patients (code blue and RRT calls only) | Chart review (retrospective)       | 1 | N | Ext | PICU transfer and critical intervention in PICU among RRT and code calls | 113 (64 cases)  | S | Conference abstract only. Describes retrospective chart review of code blue and RRT calls over a year – Bedside PEWS scores calculated and comparisons drawn between patients eventually transferred to PICU and those who stayed on ward. Preliminary analysis given in terms of mean PEWS scores for different groups – no evaluation of performance characteristics such as AUROC, sensitivity or specificity.                                                                                                                                                                              | 6  |
| 2 |                                                                                                                                                                                                                                                                                                                                                                                                                               | Gawronski 2013 <sup>26</sup> | Italy | Bone marrow transplant unit                    | Case-control study (retrospective) | 1 | N | Ext | Urgent PICU transfer, PICU consult or death                              | 21 (11 cases)   | S | Conference abstract only. Describes case-control study evaluating Bedside PEWS in an Italian bone marrow transplant unit, in relation to urgent PICU transfers or consultations. Preliminary analysis only – comparison of mean PTTT scores for cases and controls. No evaluation of performance characteristics such as AUROC, sensitivity or specificity.                                                                                                                                                                                                                                    | 6  |
| 3 | Bristol PEWT                                                                                                                                                                                                                                                                                                                                                                                                                  | Haines 2006 <sup>12</sup>    | UK    | All in-patients                                | Chart review (retrospective)       | 1 | Y | Int | Transfer to PICU or HDU                                                  | 360 (180 cases) | T | Describes development and piloting of the Bristol PEWT in a UK tertiary centre. Only included children who would have triggered the pilot version of the tool (n=360) and then identified PICU or HDU transfers from this population. Paper presents specificity and sensitivity outcomes but they are incorrectly calculated, so results not included in analysis.                                                                                                                                                                                                                            | 9  |
| 4 | Modified Bristol PEWT (a)                                                                                                                                                                                                                                                                                                                                                                                                     | Sefton 2014 <sup>27</sup>    | UK    | All in-patients                                | Chart review (retrospective)       | 1 | Y | Int | Transfer to PICU, cardiac / respiratory arrest or unexpected death       | Unclear         | T | Conference abstract only. Describes a retrospective review of 5 years of data from locally implemented PTTT in a UK tertiary centre, presenting a multiple regression model identifying seven components (including age) most strongly associated with subsequent adverse event if triggered. Of the six clinical elements, all were associated with increased odds of an adverse event, except nurse concern which was significantly associated with decreased odds of an adverse event. No evaluation of overall PTTT performance characteristics such as AUROC, sensitivity or specificity. | 10 |
| 5 | PTTT names refer to those described in Table 2                                                                                                                                                                                                                                                                                                                                                                                |                              |       |                                                |                                    |   |   |     |                                                                          |                 |   |                                                                                                                                                                                                                                                                                                                                                                                                                                                                                                                                                                                                |    |
| 6 | All studies conducted in a specialist / tertiary centre.                                                                                                                                                                                                                                                                                                                                                                      |                              |       |                                                |                                    |   |   |     |                                                                          |                 |   |                                                                                                                                                                                                                                                                                                                                                                                                                                                                                                                                                                                                |    |
| 7 | Studies classified as internal validation if the setting for the study was the same hospital and same research team as those who developed the score. Studies classified as external validation if the score was tested in a different centre and by a different research team to those who developed it.                                                                                                                     |                              |       |                                                |                                    |   |   |     |                                                                          |                 |   |                                                                                                                                                                                                                                                                                                                                                                                                                                                                                                                                                                                                |    |
| 8 | PTTT, paediatric track and trigger tool; S, score; T, trigger; AUROC, area under the receiver operating characteristic curve; PPV, positive predictive value, NPV, negative predictive value; PICU, paediatric intensive care unit; PHDU, paediatric high-dependency unit; RRT, rapid response team; HFNC, high flow nasal cannula; UK, United Kingdom; US, United States; Int, Internal validation; Ext, external validation |                              |       |                                                |                                    |   |   |     |                                                                          |                 |   |                                                                                                                                                                                                                                                                                                                                                                                                                                                                                                                                                                                                |    |

Supplementary Table 5 – Effectiveness papers excluded from analysis

| Reference                   | Intervention           |                           |                             |                            | PTTT                       | Country | Number of centres | Specialist unit? | Existing RRT / MET? | Population                      | Study design                                    | Study duration in months (before & after intervention) | Description and reason for excluding from analysis                                                                                                                                                                                                                                                                                                                                                                          | Quality score (max = 26) |
|-----------------------------|------------------------|---------------------------|-----------------------------|----------------------------|----------------------------|---------|-------------------|------------------|---------------------|---------------------------------|-------------------------------------------------|--------------------------------------------------------|-----------------------------------------------------------------------------------------------------------------------------------------------------------------------------------------------------------------------------------------------------------------------------------------------------------------------------------------------------------------------------------------------------------------------------|--------------------------|
|                             | Implemented a new PTTT | Implemented new RRT / MET | Modified escalation process | Staff training / education |                            |         |                   |                  |                     |                                 |                                                 |                                                        |                                                                                                                                                                                                                                                                                                                                                                                                                             |                          |
| Mistry 2006 <sup>51</sup>   | ✓                      | ✓                         |                             | ✓                          | PRRT activation criteria*  | US      | 1                 | Y                | N                   | All in-patients                 | Uncontrolled before-after study (prospective)   | 11 (6 before, 5 after)                                 | Describes implementation of a PRRT with calling criteria (not defined). Looked at impact on mortality, cardiac arrests and PICU outcomes among PICU transfers. Reports absolute decreases in numbers of deaths and arrests post-intervention, but no denominator data provided or further statistical details given.                                                                                                        | 3                        |
| Demmel 2010 <sup>52</sup>   | ✓                      |                           |                             |                            | Modified Brighton PEWS (e) | US      | 1                 | Y                | Y                   | Haematology / oncology patients | Uncontrolled before-after study (prospective)   | Unclear (unclear, 8 after)                             | Implemented a locally modified version of the Brighton PEWS in a specialist haematology / oncology unit. Discusses challenges in the development and implementation of the tool. Refers to number of days between cardiopulmonary arrests being 299 immediately before implementation, and 1,053 days eight months after implementation – however, no denominator data or further statistical details given.                | 8                        |
| Sandhu 2010 <sup>53</sup>   |                        | ✓                         |                             |                            | Unclear                    | UK      | 1                 | Y                | N                   | Unclear                         | Uncontrolled before-after study (retrospective) | Unclear (unclear, 3 months)                            | Conference abstract only. Reported implementing an ‘outreach response team’ alongside an existing ‘paediatric early warning tool’ (unclear which tool) in a UK tertiary centre. Reference to comparable triggering rate of PTTT before (28% of patients) and after (28% of patients) piloting the outreach team, and 2 arrests before piloting, and 0 after – but no denominator data or further statistical details given. | 8                        |
| Randhawa 2011 <sup>54</sup> | ✓                      |                           | ✓                           | ✓                          | Brighton PEWS              | US      | 1                 | Y                | Y                   | All in-patients                 | Uncontrolled before-after study (prospective)   | Unclear                                                | Describes implementation of the Brighton PEWS in a specialist paediatric centre. Details various cycles of change during implementation of the tool across different wards, and efforts at staff education. Reports reduction in rate of cardiopulmonary arrests post-intervention, but no absolute numbers, denominator data or further statistical details given.                                                         | 12                       |

|                             |   |   |   |   |                                                                           |    |   |   |    |    |                                 |                                                 |                                    |                                                                                                                                                                                                                                                                                                                                                                                                                                           |    |    |    |    |    |    |    |    |    |    |    |    |    |    |    |    |    |    |    |    |    |    |    |    |    |    |    |    |    |    |    |
|-----------------------------|---|---|---|---|---------------------------------------------------------------------------|----|---|---|----|----|---------------------------------|-------------------------------------------------|------------------------------------|-------------------------------------------------------------------------------------------------------------------------------------------------------------------------------------------------------------------------------------------------------------------------------------------------------------------------------------------------------------------------------------------------------------------------------------------|----|----|----|----|----|----|----|----|----|----|----|----|----|----|----|----|----|----|----|----|----|----|----|----|----|----|----|----|----|----|----|
| 1                           | 2 | 3 | 4 | 5 | 6                                                                         | 7  | 8 | 9 | 10 | 11 | 12                              | 13                                              | 14                                 | 15                                                                                                                                                                                                                                                                                                                                                                                                                                        | 16 | 17 | 18 | 19 | 20 | 21 | 22 | 23 | 24 | 25 | 26 | 27 | 28 | 29 | 30 | 31 | 32 | 33 | 34 | 35 | 36 | 37 | 38 | 39 | 40 | 41 | 42 | 43 | 44 | 45 | 46 |
| Camacho 2011 <sup>55</sup>  | ✓ |   |   |   | Modified Brighton PEWS (a) †                                              | US | 1 | Y | N  | R  | Cardiac and renal patients      | Uncontrolled before-after study (prospective)   | 8<br>(3 before, 5 after)           | Conference abstract only. Reported piloting and modifying Tucker's modified Brighton PEWS for specialist cardiac and renal population. Unclear if RRT/MET in place. Referred to there being 5 code calls in the quarter (3 months) before implementation, and 0 in the following 5 months. However, no denominator data or further statistical details given.                                                                             | 8  |    |    |    |    |    |    |    |    |    |    |    |    |    |    |    |    |    |    |    |    |    |    |    |    |    |    |    |    |    |    |
| Heyden 2012 <sup>56</sup>   | ✓ | ✓ |   |   | PRRT activation criteria*                                                 | US | 1 | Y | N  |    | All in-patients                 | Uncontrolled before-after study (retrospective) | 72<br>(24 before, 48 after)        | Conference abstract only. Describes implementation of an RRT in a US tertiary centre, with an associated 'broad calling criteria' (limited details given). Reports number of cardiac arrests on ward and PICU before and after intervention, and refers to increase in RRT calls over time. No denominator data or further statistical details given.                                                                                     | 7  |    |    |    |    |    |    |    |    |    |    |    |    |    |    |    |    |    |    |    |    |    |    |    |    |    |    |    |    |    |    |
| Somberg 2013                | ✓ | ✓ |   |   | Unclear                                                                   | US | 1 | N | N  |    | All in-patients                 | Uncontrolled before-after study (unclear)       | Unclear                            | Conference abstract only. Reported developing and implementing a PTTT (tool not named) and RRT for a paediatric unit in a community hospital. Reference to no intubation or code calls since intervention, but no pre-intervention comparison, time frames, denominator data or further statistical details given.                                                                                                                        | 2  |    |    |    |    |    |    |    |    |    |    |    |    |    |    |    |    |    |    |    |    |    |    |    |    |    |    |    |    |    |    |
| Norville 2013 <sup>57</sup> | ✓ |   |   |   | Texas Children's Hospital (TCH) Paediatric Advanced Warning Score (PAWS)† | US | 1 | Y | Y  |    | Bone marrow transplant patients | Uncontrolled before-after study (unclear)       | 23<br>(12 before, 11 after)        | Conference abstract only. Describes implementation of TCH PAWS, with amended algorithm for specialist bone marrow transplant unit. Looked at impact on code calls and RRT calls – refers to 3 code calls and 18 RRT calls pre-intervention, compared to 0 codes and 25 RRT calls post-intervention. No denominator data or further statistical details given.                                                                             | 5  |    |    |    |    |    |    |    |    |    |    |    |    |    |    |    |    |    |    |    |    |    |    |    |    |    |    |    |    |    |    |
| Ambati 2014 <sup>58</sup>   |   |   |   | ✓ | Not applicable                                                            | US | 1 | Y | Y  |    | Unclear                         | Uncontrolled before-after study (unclear)       | 48<br>(12 before, 36 after)        | Conference abstract only. Reported effect of implementing a "simulation based curriculum" for clinical staff on subsequent RRT utilisation. Reference to increase in RRT calls year on year post implementation, but no denominator data or further statistical details given.                                                                                                                                                            | 3  |    |    |    |    |    |    |    |    |    |    |    |    |    |    |    |    |    |    |    |    |    |    |    |    |    |    |    |    |    |    |
| Ocholi 2014 <sup>59</sup>   | ✓ |   |   |   | Bedside PEWS                                                              | UK | 1 | Y | N  |    | Unclear                         | Uncontrolled before-after study (unclear)       | 12 months<br>(6 before, 6 after)   | Conference abstract only. Describes implementation of Bedside PEWS in a UK tertiary centre. Looked at impact of intervention on ward outcomes and outcomes of children transferred to PICU. Reference to impact of tool on number of 'adverse incidents' (not defined) on the ward and median length of stay in PICU among PICU transfers, but no denominator data or further statistical details given.                                  | 6  |    |    |    |    |    |    |    |    |    |    |    |    |    |    |    |    |    |    |    |    |    |    |    |    |    |    |    |    |    |    |
| Fenix 2016 <sup>39</sup>    | ✓ |   |   | ✓ | Unclear                                                                   | US | 1 | Y | N  | R  | Two general paediatric wards    | Uncontrolled before-after study (retrospective) | 46 months<br>(16 before, 30 after) | Conference abstract only. Describes implementation of a 'Situational Awareness' tool, with integrated PTTT (unclear which tool) in a tertiary centre. Retrospective review of rates of Critical Deterioration (CD) events on two of seven general paediatric wards. Reports a significant decrease in trend and trajectory of CD events post-implementation, but no event numbers, denominator data or further statistical details given. | 6  |    |    |    |    |    |    |    |    |    |    |    |    |    |    |    |    |    |    |    |    |    |    |    |    |    |    |    |    |    |    |

1  
2  
3  
4  
5  
6  
7  
8  
9  
10  
11  
12  
13  
14  
15  
16  
17  
18  
19  
20  
21  
22  
23  
24  
25  
26  
27  
28  
29  
30  
31  
32  
33  
34  
35  
36  
37  
38  
39  
40  
41  
42  
43  
44  
45  
46

PTTT names refer to those described in Table 2

\* Indicates PTTT not fully described or validated in the published literature

† PTTT modified by local team, but exact modifications not described

PTTT, paediatric track and trigger tool; RRT, rapid response team; MET, medical emergency team; PICU, paediatric intensive care unit; US, United States; UK, United Kingdom

For peer review only

# BMJ Open

## Validity and effectiveness of paediatric early warning systems and track and trigger tools for identifying and reducing clinical deterioration in hospitalised children: a systematic review

|                                 |                                                                                                                                                                                                                                                                                                                                                                                                                                                                                                                                                                                                                                                                                                                                                                                                                                                                                                                                                                                                                                                                                                                                                                                                                                                                                                                                   |
|---------------------------------|-----------------------------------------------------------------------------------------------------------------------------------------------------------------------------------------------------------------------------------------------------------------------------------------------------------------------------------------------------------------------------------------------------------------------------------------------------------------------------------------------------------------------------------------------------------------------------------------------------------------------------------------------------------------------------------------------------------------------------------------------------------------------------------------------------------------------------------------------------------------------------------------------------------------------------------------------------------------------------------------------------------------------------------------------------------------------------------------------------------------------------------------------------------------------------------------------------------------------------------------------------------------------------------------------------------------------------------|
| Journal:                        | <i>BMJ Open</i>                                                                                                                                                                                                                                                                                                                                                                                                                                                                                                                                                                                                                                                                                                                                                                                                                                                                                                                                                                                                                                                                                                                                                                                                                                                                                                                   |
| Manuscript ID                   | bmjopen-2018-022105.R2                                                                                                                                                                                                                                                                                                                                                                                                                                                                                                                                                                                                                                                                                                                                                                                                                                                                                                                                                                                                                                                                                                                                                                                                                                                                                                            |
| Article Type:                   | Research                                                                                                                                                                                                                                                                                                                                                                                                                                                                                                                                                                                                                                                                                                                                                                                                                                                                                                                                                                                                                                                                                                                                                                                                                                                                                                                          |
| Date Submitted by the Author:   | 23-Jan-2019                                                                                                                                                                                                                                                                                                                                                                                                                                                                                                                                                                                                                                                                                                                                                                                                                                                                                                                                                                                                                                                                                                                                                                                                                                                                                                                       |
| Complete List of Authors:       | Trubey, Rob; Cardiff University, Centre for Trials Research<br>Huang, Chao; Cardiff University, Centre for Trials Research<br>Lugg-Widger, Fiona; Cardiff University, Centre for Trials Research<br>Hood, Kerenza; Cardiff University, Centre for Trials Research<br>Allen, Davina; Cardiff University, School of Healthcare Sciences<br>Edwards, Dawn; Morriston Hospital, Department of Paediatrics<br>Lacy, David; Wirral University Teaching Hospital<br>Lloyd, Amy; Cardiff University, Centre for Trials Research<br>Mann, Mala; Cardiff University, University Library Services<br>Mason, Brendan; Public Health Wales<br>Oliver, Alison; Noah's Ark Children's Hospital for Wales, Department of Paediatric Intensive Care<br>Roland, Damian; Paediatric Emergency Medicine Leicester Academic (PEMLA) Group, Emergency Department<br>Sefton, G.; Alder Hey Children's NHS Fdn Trust,<br>Skone, Richard; Noah's Ark Children's Hospital for Wales, Department of Paediatric Intensive Care<br>Thomas-Jones, Emma; Cardiff University, Centre for Trials Research<br>Tume, Lyvonne N.; University of the West of England Bristol, Faculty of Health and Applied Sciences (HAS)<br>Powell, Colin; Children's Hospital for Wales, Paediatrics; Sidra Medical and Research Center, Department of Pediatric Emergency Medicine |
| <b>Primary Subject Heading</b>: | Paediatrics                                                                                                                                                                                                                                                                                                                                                                                                                                                                                                                                                                                                                                                                                                                                                                                                                                                                                                                                                                                                                                                                                                                                                                                                                                                                                                                       |
| Secondary Subject Heading:      | Paediatrics, Nursing, Intensive care, Health policy, Diagnostics                                                                                                                                                                                                                                                                                                                                                                                                                                                                                                                                                                                                                                                                                                                                                                                                                                                                                                                                                                                                                                                                                                                                                                                                                                                                  |
| Keywords:                       | Quality in health care < HEALTH SERVICES ADMINISTRATION & MANAGEMENT, Paediatric intensive & critical care < INTENSIVE & CRITICAL CARE, PAEDIATRICS                                                                                                                                                                                                                                                                                                                                                                                                                                                                                                                                                                                                                                                                                                                                                                                                                                                                                                                                                                                                                                                                                                                                                                               |
|                                 |                                                                                                                                                                                                                                                                                                                                                                                                                                                                                                                                                                                                                                                                                                                                                                                                                                                                                                                                                                                                                                                                                                                                                                                                                                                                                                                                   |

SCHOLARONE™  
Manuscripts

1  
2  
3  
4  
5  
6  
7  
8  
9  
10  
11  
12  
13  
14  
15  
16  
17  
18  
19  
20  
21  
22  
23  
24  
25  
26  
27  
28  
29  
30  
31  
32  
33  
34  
35  
36  
37  
38  
39  
40  
41  
42  
43  
44  
45  
46  
47  
48  
49  
50  
51  
52  
53  
54  
55  
56  
57  
58  
59  
60

1  
2  
3 **Validity and effectiveness of paediatric early warning systems and track and trigger**  
4 **tools for identifying and reducing clinical deterioration in hospitalised children: a**  
5 **systematic review**  
6  
7

8 **Authors:** Rob Trubey<sup>1†</sup>, Chao Huang<sup>1</sup>, Fiona Lugg-Widger<sup>1</sup>, Kerenza Hood<sup>1</sup>, Davina Allen<sup>2</sup>,  
9 Dawn Edwards<sup>3</sup>, David Lacy<sup>4</sup>, Amy Lloyd<sup>1</sup>, Mala Mann<sup>5</sup>, Brendan Mason<sup>6</sup>, Alison Oliver<sup>7</sup>,  
10 Damian Roland<sup>8</sup>, Gerri Sefton<sup>9</sup>, Richard Skone<sup>7</sup>, Emma Thomas-Jones<sup>1</sup>, Lyvonne Tume<sup>9</sup>,  
11 Colin Powell<sup>10,11</sup>  
12  
13

14 **1** Centre for Trials Research, Cardiff University, Heath Park, Cardiff, UK

15 **2** School of Healthcare Sciences, Cardiff University, Eastgate House, Cardiff, UK

16 **3** Department of Paediatrics, Morriston Hospital, Swansea, UK

17 **4** Wirral University Teaching Hospital, Wirral, UK

18 **5** Specialist Unit for Review Evidence (SURE), Cardiff University, Heath Park, Cardiff, UK

19 **6** Public Health Wales, Cardiff, UK

20 **7** Department of Paediatric Intensive Care, Children's Hospital for Wales, Cardiff, UK

21 **8** Paediatric Emergency Medicine Leicester Academic (PEMLA) Group, Emergency  
22 Department, Infirmary Square, Leicester, UK

23 **9** Paediatric Intensive Care Unit, Alder Hey Children's NHS Foundation Trust, Liverpool,  
24 UK

25 **10** Department of Child Health, Children's Hospital for Wales, Division of Population  
26 Medicine School of Medicine, Cardiff University, Cardiff, UK,

27 **11** Department of Pediatric Emergency Medicine, Sidra Medicine, Doha, Qatar  
28  
29  
30  
31  
32  
33

34 **Corresponding author:**

35 Dr. Rob Trubey, Centre for Trials Research, Cardiff University, Heath Park, Cardiff, UK  
36 [trubeyrj@cf.ac.uk](mailto:trubeyrj@cf.ac.uk)  
37  
38

39 **Keywords:** PEWS, track and trigger scores, early warning scores, clinical deterioration,  
40 children, systematic review  
41  
42  
43  
44  
45  
46  
47  
48  
49  
50  
51  
52  
53  
54  
55  
56  
57  
58  
59  
60



## ABSTRACT

### Objective

To assess (1) how well validated existing paediatric track and trigger tools (PTTT) are for predicting adverse outcomes in hospitalised children, and (2) how effective broader paediatric early warning systems are at reducing adverse outcomes in hospitalised children.

### Design

Systematic review.

### Data sources

British Nursing Index, CINAHL, Cochrane Central Register of Controlled Trials, Database of Abstracts of Reviews of Effectiveness, EMBASE, HMIC, Medline, Medline in Process, Scopus and Web of Knowledge searched through May 2018.

### Eligibility criteria

We included (1) papers reporting on the development or validation of a PTTT or (2) the implementation of a broader early warning system in paediatric units (age 0-18), where adverse outcome metrics were reported. Several study designs were considered. PROSPERO registration number CRD42015015326.

### Data extraction and synthesis

Data extraction was conducted by two independent reviewers using template forms. Studies were quality assessed using a modified Downs and Black rating scale.

### Results

36 validation studies and 30 effectiveness studies were included, with 27 unique PTTT identified. Validation studies were largely retrospective case-control studies or chart reviews, while effectiveness studies were predominantly uncontrolled before-after studies. Metrics of adverse outcomes varied considerably. Some PTTT demonstrated good diagnostic accuracy in retrospective case-control studies (primarily for predicting PICU transfers) but positive predictive value was consistently low, suggesting potential for alarm fatigue. A small number of effectiveness studies reported significant decreases in mortality, arrests or code calls, but

1  
2  
3 were limited by methodological concerns. Overall, there was limited evidence of paediatric  
4 early warning system interventions leading to reductions in deterioration.  
5  
6  
7

### 8 **Conclusion**

9  
10 There are several fundamental methodological limitations in the PTTT literature, and the  
11 predominance of single-site studies carried out in specialist centres greatly limits  
12 generalisability. With limited evidence of effectiveness, calls to make PTTT mandatory  
13 across all paediatric units are not supported by the evidence base.  
14  
15  
16  
17  
18  
19  
20  
21  
22  
23  
24  
25  
26  
27  
28  
29  
30  
31  
32  
33  
34  
35  
36  
37  
38  
39  
40  
41  
42  
43  
44  
45  
46  
47  
48  
49  
50  
51  
52  
53  
54  
55  
56  
57  
58  
59  
60

For peer review only

## STRENGTHS AND LIMITATIONS OF THIS STUDY

- Paediatric early warning systems and paediatric track and trigger tools (PTTT) are increasingly used by paediatric units across Europe, North America, Australia and elsewhere – this study is a timely review of the evidence for their validity and effectiveness
- A comprehensive search was carried out across multiple databases and included published as well as grey literature
- The review highlights methodological weaknesses and gaps in the current evidence base and makes suggestions for future research
- Heterogeneity in study populations, study designs and outcome measures make it difficult to compare and synthesise findings across the wide range of early warning systems and PTTT being used in practice
- The review is limited in scope to quantitative validation and effectiveness studies, so must be considered alongside wider literature reflecting on potential secondary benefits of early warning systems and PTTT for communication, teamwork and empowerment

## BACKGROUND

Failure to recognise and respond to clinical deterioration in hospitalised children is a major safety concern in healthcare. The underlying causes of this problem are clearly multifactorial<sup>1-3</sup> but paediatric ‘early warning systems’ have been strongly advocated as one approach to improving recognition of deterioration in paediatric units<sup>1,2,4</sup>.

A paediatric ‘early warning system’ can be considered any patient safety initiative or programme which aims to monitor, detect and respond to signs of deterioration in hospitalised children in order to avert adverse outcomes and premature death. Such systems are often multi-faceted and may include the use of rapid response teams (RRT) or medical emergency teams (MET), education or training to improve clinical staff’s ability to identify deterioration or strategies aimed at improving staff communication and situational awareness.

An increasingly commonplace paediatric ‘early warning system’ initiative is the use of a ‘track and trigger tool’: these tools, also commonly used in adult care, provide a formal framework for evaluating routine physiological, clinical and observational data for early indicators of patient deterioration. They are typically integrated into routine observation charts or electronic health records and compare patient observations to pre-defined ‘normal’ thresholds. When one or more observation is considered abnormal, staff are directed to various clinical actions, including but not limited to altered frequency of observations, review by senior staff or more appropriate treatment or management. Tools may be paper based or electronic and monitoring may be automated or manually undertaken by staff.

These tools have been referred to in the literature using a number of different terms: paediatric early warning scores (PEWS); paediatric early warning tools (PEWT), track and trigger tools (TTT) and many others. Here, we refer to the tools themselves using the term ‘paediatric track and trigger tools’ (PTTT). A variety of PTTT have been developed, typically by teams based in specialist paediatric centres and often used as a means of triggering a dedicated response team. Their advocacy has recently led to widespread uptake across a variety of different paediatric units, including many non-specialist centres where patient populations and resources may differ. In the United Kingdom (UK), a recent cross-sectional survey found that 85% of paediatric units were using some form of PTTT, most of which were non-specialist centres without a dedicated response team<sup>5</sup>. Despite their widespread use, recent reviews have questioned the evidence-base for their effectiveness in improving patient outcomes<sup>6,7</sup>. The current review aimed to build on this work, assessing in depth the evidence

1  
2  
3 base for both the validity of PTTT for predicting in-patient deterioration and the effectiveness  
4 of broader 'early warning systems' at reducing instances of mortality and morbidity in  
5 paediatric settings:  
6  
7

- 8
- 9 • Question 1: How well validated are existing paediatric track and trigger tools (PTTT)
- 10 and their component parts for predicting in-patient deterioration?
- 11
- 12 • Question 2: How effective are paediatric early warning systems (with or without a
- 13 PTTT) at reducing mortality and critical events?
- 14
- 15
- 16
- 17
- 18
- 19
- 20
- 21
- 22
- 23
- 24
- 25
- 26
- 27
- 28
- 29
- 30
- 31
- 32
- 33
- 34
- 35
- 36
- 37
- 38
- 39
- 40
- 41
- 42
- 43
- 44
- 45
- 46
- 47
- 48
- 49
- 50
- 51
- 52
- 53
- 54
- 55
- 56
- 57
- 58
- 59
- 60

For peer review only

## METHODS

This systematic review is reported in accordance with the Preferred Reporting Items for Systematic Review and Meta-Analyses (PRISMA) guidelines<sup>8</sup>. Our review protocol is registered with the PROSPERO database CRD42015015326.

### Search strategy

A comprehensive search was conducted across a range of databases to identify relevant studies in the English language. Published and unpublished literature was considered where publicly available, as were studies in press. The following databases were searched through May 2018: British Nursing Index, CINAHL (Cumulative Index of Nursing and Allied Health Literature), Cochrane Central Register of Controlled Trials, Database of Abstracts of Reviews of Effectiveness, EMBASE, HMIC (Health Management Information Centre), Medline, Medline in Process, Scopus and Web of Knowledge (Science Citation Indexes). To identify additional papers, published, unpublished or research reported in the grey literature a range of relevant websites and trial registers were searched including ClinicalTrials.gov. To identify published papers that had not yet been catalogued in the electronic databases, recent editions of key journals were hand-searched. The search terms included 'early warning scores', 'alert criteria', 'rapid response', 'track and trigger' and 'early medical intervention'. (Supplementary Table 1)

### Eligibility screening and study selection

PICOS parameters guided inclusion criteria for the validation and effectiveness studies (Supplementary Table 2). Papers reporting development of validation of a PTTT were included for Question 1, whereas papers reporting the implementation of any broader 'paediatric early warning system' (with or without a PTTT) were eligible for Question 2. Both research questions were limited to studies that involved in-patients aged 0-18. Outcome measures considered were mortality and critical events, including: unplanned admission to a higher level of care, cardiac arrest, respiratory arrest, medical emergencies requiring immediate assistance, children reviewed by Paediatric Intensive Care Unit (PICU) staff on the ward (in specialist centres) or reviewed by external PICU staff (for non-specialist centres), acuity at PICU admission and PICU outcomes. A range of study designs were considered for both questions.

1  
2  
3 Two of the review authors independently screened the titles and abstracts yielded in the  
4 search. Full texts were reviewed independently by six reviewers against the above eligibility  
5 criteria and were assigned to the relevant review question if included. Reasons for exclusion  
6 were recorded. Separate data extraction forms were developed for validation and  
7 effectiveness studies. The forms had common elements (study design, country, setting, study  
8 population, description of the PTTT or early warning system, statistical techniques used,  
9 outcomes assessed). Additional data items for validation studies included the items in the  
10 PTTT, modifications to the PTTT from previous versions, predictive ability of individual  
11 items and the overall tool, sensitivity and specificity and inter and intra-rater reliability.  
12 Effectiveness studies included an assessment of outcomes in terms of mortality and various  
13 morbidity variables. Data extraction was carried out by two reviewers and discrepancies were  
14 resolved by discussion. For effectiveness studies, effect sizes and 95% confidence intervals  
15 (CI) were calculated or reported as risk ratios (RR) or odds ratios (OR) as appropriate, with  
16 p-values reported to assess statistical significance. Data analysis was conducted using an  
17 online medical statistics tool.

### 28 29 **Quality appraisal**

30  
31 Methodological quality and risk of bias was assessed for each included study using a  
32 modified version of the Downs and Black rating scale<sup>9</sup> (templates shown in Supplementary  
33 Table 3).  
34  
35  
36

### 37 **Patient and Public Involvement**

38  
39 This review was conducted as part of a larger mixed-methods study (ISRCTN94228292),  
40 which used a formal, facilitated parental advisory group. The group comprised parents of  
41 children who had experienced an unexpected adverse event in a paediatric unit and provided  
42 input which helped to shape the broader research questions and outcome measures. The  
43 results of the review will be disseminated to parents through this group.  
44  
45  
46  
47  
48  
49  
50  
51  
52  
53  
54  
55  
56  
57  
58  
59  
60

## REVIEW RESULTS

Figure 1 shows the PRISMA flow diagram for both research questions.

[FIGURE 1]

### Study characteristics

Table 1 summarises the study characteristics of the 36 validation (Question 1) and 30 effectiveness (Question 2) papers included in the review.

| Validation studies (n=36)    |    |      | Effectiveness studies (n=30) |    |      |
|------------------------------|----|------|------------------------------|----|------|
|                              | N  | %    |                              | n  | %    |
| <b>Type</b>                  |    |      | <b>Type</b>                  |    |      |
| Full text                    | 22 | 61.1 | Full text                    | 21 | 70.0 |
| Abstract                     | 14 | 38.9 | Abstract                     | 9  | 30.0 |
|                              |    |      |                              |    |      |
| <b>Country</b>               |    |      | <b>Country</b>               |    |      |
| United States                | 15 | 41.7 | United States                | 18 | 60.0 |
| United Kingdom               | 12 | 33.3 | United Kingdom               | 3  | 10.0 |
| Canada                       | 2  | 5.5  | Canada                       | 2  | 6.7  |
| Australia                    | 0  | 0.0  | Australia                    | 3  | 10.0 |
| Other                        | 5  | 13.9 | Other                        | 3  | 10.0 |
| Multiple                     | 1  | 2.8  | Multiple                     | 1  | 3.3  |
| Unclear                      | 1  | 2.8  | Unclear                      | 0  | 0.0  |
|                              |    |      |                              |    |      |
| <b>Year of study</b>         |    |      | <b>Year of study</b>         |    |      |
| Pre-2012                     | 10 | 27.8 | Pre-2012                     | 15 | 50.0 |
| 2012                         | 3  | 8.3  | 2012                         | 1  | 3.3  |
| 2013                         | 6  | 16.7 | 2013                         | 2  | 6.7  |
| 2014                         | 5  | 13.9 | 2014                         | 6  | 20.0 |
| 2015                         | 7  | 19.4 | 2015                         | 0  | 0.0  |
| 2016                         | 2  | 5.6  | 2016                         | 2  | 6.7  |
| 2017                         | 3  | 8.3  | 2017                         | 1  | 3.3  |
| 2018                         | 0  | 0.0  | 2018                         | 3  | 10.0 |
|                              |    |      |                              |    |      |
| <b>Setting</b>               |    |      | <b>Setting</b>               |    |      |
| Specialist / tertiary        | 33 | 91.7 | Specialist / tertiary        | 29 | 96.7 |
| Non-specialist / community   | 0  | 0.0  | Non-specialist / community   | 1  | 3.3  |
| Unclear                      | 3  | 8.3  | Unclear                      | 0  | 0.0  |
|                              |    |      |                              |    |      |
| <b>Single / multi-centre</b> |    |      | <b>Single / multi-centre</b> |    |      |
| Single-centre                | 35 | 97.2 | Single-centre                | 28 | 93.3 |
| Multi-centre                 | 1  | 2.8  | Multi-centre                 | 2  | 6.7  |
|                              |    |      |                              |    |      |
| <b>Study population</b>      |    |      | <b>Study population</b>      |    |      |
| General in-patients          | 23 | 63.9 | General in-patients          | 20 | 66.6 |
| Specialist population        | 11 | 30.6 | Specialist population        | 5  | 16.7 |
| Unclear                      | 2  | 5.6  | Unclear                      | 5  | 16.7 |
|                              |    |      |                              |    |      |
| <b>Study design</b>          |    |      | <b>Study design</b>          |    |      |
| Case-control                 | 18 | 50.0 | Uncontrolled before-after    | 26 | 86.7 |



|                     |    |      |                          |   |     |
|---------------------|----|------|--------------------------|---|-----|
| Case / chart review | 10 | 27.8 | Controlled before-after  | 1 | 3.3 |
| Cohort              | 7  | 19.4 | Interrupted Time Series  | 2 | 6.7 |
| Pilot study         | 1  | 2.8  | Cluster randomised trial | 1 | 3.3 |

**Table 1: Summary study characteristics of validation and effectiveness papers in the review**

## Types of PTTS and components

Across 66 studies, we identified 27 unique PTTT (Table 2). Twenty PTTTs were based on one of four different tools: Monaghan's Brighton PEWS<sup>10</sup>, the Bedside PEWS<sup>11</sup>, the Bristol PEWT<sup>12</sup> and the Melbourne Activation Criteria<sup>13</sup>. Other PTTT described in the literature included the National Health Service Institute for Innovation and Improvement (NHS III) PEWS<sup>14</sup> (the second most commonly used PTTT in United Kingdom paediatric settings<sup>5</sup>), RRT and MET activation criteria<sup>15–18</sup>, and one prediction algorithm developed from a large dataset of electronic health data<sup>19</sup>.

[TABLE 2]

Table 2 illustrates the range of physiological and behavioural parameters underpinning PTTT. Common parameters included heart rate (present in 26 out of 27 PTTT), respiratory rate (24), respiratory effort (24) and level of consciousness or behavioural state (24). All PTTT required at least six different parameters to be collected.

## Question 1 – How well validated are PTTT and component parts for predicting in-patient deterioration?

Nine validation papers meeting inclusion criteria were excluded from analysis: eight did not report any performance characteristics of the PTTT for predicting deterioration<sup>20–27</sup> and one study calculated incorrect sensitivity/specificity outcomes<sup>12</sup> (Supplementary Table 4). The remaining 27 validation studies, evaluating the performance of 18 unique PTTT, are described in Table 3. Four studies evaluated multiple PTTTs<sup>3,19,28,29</sup> and one paper described three separate studies of the same PTTT<sup>30</sup>.

[TABLE 3]

Five cohort studies were included<sup>14,31–34</sup>, three based on the same dataset. All other studies were either case-control or chart reviews. Thirteen papers implemented the PTTT in practice<sup>23,30,31,34–43</sup>, while the remaining studies 'bench tested' the PTTT – researchers retrospectively calculated the score based on data abstracted from medical charts and records. All studies were conducted in specialist centres with only one multi-centre study reported<sup>44</sup>.

## Outcome measures

PTTT were evaluated for their ability to predict a wide range of clinical outcomes. Composite measures were used in eight studies<sup>14,23,29,32,33,37,45,46</sup>, cardiac/respiratory arrest or a “code call” was used (singularly or part of a composite outcome) in six studies<sup>23,28,29,37,45,47</sup>, while 22 studies used transfer to a PICU or Paediatric High-Dependency Unit (PHDU) as the main outcome<sup>3,11,19,23,28–34,36,37,39,41–44,46,48,49</sup>.

#### *Predictive ability of individual PTTT components*

Three validation papers reported on the performance characteristics of individual components of the tool for predicting adverse outcomes<sup>11,33,42</sup>. Parshuram and colleagues, for instance, reported Area Under the Receiver Operating Characteristic curve (AUROC) values for individual PTTT items of a pilot version of the Bedside PEWS: ranging from 0.54 (bolus fluid) to 0.81 (heart rate), compared to 0.91 for the overall PTTT<sup>11</sup>. All other studies reported outcomes for the PTTT as a whole.

#### *Paediatric Early Warning System (PEWS) score*

The predictive ability of the 16-item PEWS score was assessed by one internal<sup>47</sup> (AUROC=0.90) and two external case-control studies<sup>28,29</sup> (AUROC range =0.82-0.88) with a range of outcome measures and scoring thresholds. One case-control study used an observed prevalence rate to calculate a positive predictive value (PPV) of 4.2% for the tool in predicting code calls<sup>47</sup> (for every 1,000 patients triggering the PTTT, 42 would be expected to deteriorate).

#### *Bedside PEWS and derivatives*

The Bedside PEWS was evaluated in one internal<sup>11</sup> (AUROC=0.91) and five external case-control studies<sup>19,28,44,46,50</sup> (AUROC range=0.73-0.90) for a range of different outcome measures and at different scoring thresholds. One case-control study calculated a PPV of 2.1% for identifying children requiring urgent PICU transfer within 24 hours of admission, based on locally observed prevalence rates<sup>19</sup>. A modified version of the Bedside PEWS (with temperature added) demonstrated an AUROC of 0.86 in an external case-control study with a composite outcome of death, arrest or unplanned PICU transfer<sup>29</sup>.

#### *Brighton PEWS and derivatives*

Six different PTTT based on the original Brighton PEWS were evaluated across 11 studies<sup>19,31,37,39–42,45,48,50,51</sup>. The Modified Brighton PEWS (a) was evaluated for its ability to predict PICU transfers in one large prospective cohort study (AUROC=0.92, PPV=5.8%)<sup>31</sup>,

1  
2  
3 and an external case-control study tested the same score for predicting urgent PICU transfers  
4 within 24 hours of admission (AUROC=0.74, PPV= 2.1%)<sup>19</sup>.

7 An external case-control study used a composite measure of death, arrest or PICU transfer to  
8 evaluate the Modified Brighton PEWS (b) (AUROC=0.79) and the Modified Brighton PEWS  
9 (d) (AUROC=0.74)<sup>29</sup>. The latter tool was evaluated in a further internal case-control study for  
10 predicting PICU transfer (AUROC=0.82)<sup>48</sup>.

14 The Children's Hospital Early Warning Score (CHEWS) had a reported AUROC of 0.90 for  
15 predicting PICU transfers or arrests in a large internal case-control study<sup>51</sup>. A modification  
16 for cardiac patients, the Cardiac CHEWS (C-CHEWS) was evaluated by one internal study  
17 on a cardiac unit<sup>37</sup> (AUROC = 0.90) looking at arrests or unplanned PICU transfers, and two  
18 external studies of oncology / haematology units<sup>41,42</sup> for the same outcome (AUROC=0.95).  
19 Finally, the Children's Hospital Los Angeles (CHLA) PEWS was evaluated by in a small  
20 internal case-control study for prediction of re-admission to PICU after initial PICU  
21 discharge<sup>40</sup> (AUROC=0.71).

#### 28 *Melbourne Activation Criteria (MAC) and derivatives*

31 The MAC was assessed by one external case-control study with an outcome of death, arrest  
32 or unplanned PICU transfer<sup>29</sup> (AUROC=0.71) and a large external cohort study with an  
33 outcome of death or unplanned PICU or HDU transfer<sup>33</sup> (AUROC=0.79, PPV=3.6%). A  
34 derivative of the MAC using an aggregate score, the Cardiff & Vale PEWS (C&VPEWS),  
35 was tested using the same cohort and outcome measures in an earlier external study  
36 (AUROC=0.86, PPV=5.9%)<sup>32</sup> and was the best performing PTTT in an external case-control  
37 study evaluating multiple PTTT<sup>29</sup> (AUROC=0.89).

#### 43 *Bristol PEWT*

46 The Bristol PEWT was evaluated by five external validation studies: two chart review  
47 studies<sup>3,35</sup> (no AUROC), one small cohort study of PICU transfers<sup>34</sup> (AUROC=0.91,  
48 PPV=11%), and two case-control studies looking at code calls<sup>28</sup> (AUROC=0.75) and a  
49 composite of death, arrests and PICU transfers<sup>29</sup> (AUROC=0.62).

#### 53 *Other PTTT*

56 The NHS Institute for Improvement and Innovation (NHS III) PEWS was tested by one  
57 external cohort study looking at a composite of death or unplanned transfers to PICU or  
58 HDU<sup>14</sup> (AUROC=0.88, PPV=4.3%) and one external case-control study looking at a  
59  
60

1  
2  
3 composite of death, arrests and PICU transfers<sup>29</sup> (AUROC=0.82). Zhai and colleagues  
4 developed and retrospectively evaluated a logistic regression algorithm in an internal case-  
5 control study looking at urgent PICU transfers in the first 24 hours of admission<sup>19</sup> (AUROC  
6 =0.91, PPV=4.8%).  
7  
8  
9

10 Across PTTT, studies reporting performance characteristics of a tool at a range of different  
11 scoring thresholds demonstrate the expected interaction and trade-off between sensitivity and  
12 specificity – at lower triggering thresholds, sensitivity is high but specificity is low; at higher  
13 thresholds, the opposite is true.  
14  
15  
16

### 17 *Inter-rater reliability and completeness of data*

18  
19 Accurate assessment of the ability of a PTTT to predict clinical deterioration is contingent on  
20 accuracy and reliability of tool scoring (whether by bedside nurses in practice or by  
21 researchers abstracting data) and the availability of underpinning observations. Only five  
22 papers made reference to accuracy or reliability of scoring<sup>28,31,37,42,45</sup>, with mixed results: for  
23 example, two nurses separately scoring a sub-set of patients on the Modified Brighton PEWS  
24 (a) achieved an intra-class coefficient of 0.92<sup>31</sup>, but a study nurse and bedside nurse achieved  
25 only 67% agreement in scoring the C-CHEWS tool<sup>37</sup>. Completeness of data was reported in  
26 11 studies<sup>11,14,19,29,30,32,33,42,44,45,47</sup>. An evaluation of the Modified Bedside PEWS (a) reported  
27 that “the PEWS was correctly performed and could be used for inclusion in the study” in 59%  
28 of cases<sup>30</sup>, a prospective study bench-testing the C&VPEWS found an average completeness  
29 rate of 44% for the seven different parameters in daily practice<sup>32</sup>, while a multi-centre study  
30 of the Bedside PEWS reported that “only 5.1% [of observation sets] had measurements on all  
31 7 items”<sup>44</sup>.  
32  
33  
34  
35  
36  
37  
38  
39  
40  
41  
42

### 43 **Question 2 – how effective are early warning systems at reducing mortality and critical** 44 **events in hospitalised children?** 45

46  
47 Eleven papers meeting inclusion criteria were excluded from analysis for providing  
48 insufficient statistical information (e.g., denominator data, absolute numbers of events) to  
49 calculate effect sizes<sup>39,52–60</sup>. Further details on papers excluded from analysis are provided in  
50 Supplementary Table 5. Findings from the 19 studies included in the analysis are summarised  
51 in Table 4.  
52  
53  
54

55 [TABLE 4]  
56  
57

### 58 *Type of early warning system interventions* 59 60

1  
2  
3 Seventeen interventions involved the introduction of a new PTTT<sup>13,15-18,61-73</sup>, one  
4 intervention introduced a mandatory triggering element to an existing PTTT<sup>72</sup>, and one study  
5 reported a large, multi-centre analysis of MET introduction with no details on PTTT use<sup>74</sup>.  
6  
7 Twelve interventions included the introduction of a new MET or RRT<sup>13,15-18,61-66,70</sup>, while  
8 four further interventions introduced a new PTTT in a hospital with an existing MET or RRT.  
9  
10 Only three studies therefore evaluated a PTTT in the absence of a dedicated response  
11 team<sup>68,69,71</sup>. A staff education programme was explicitly described in ten  
12  
13 interventions<sup>13,15,17,62,63,65,68,69,71,73</sup>.  
14  
15

16  
17 Of the 18 studies that used a PTTT, only seven used a tool that had been formally evaluated  
18 for validity: three used the Bedside PEWS<sup>65,66,71</sup>, two used the MAC<sup>13,63</sup>, one used the  
19 Modified Brighton PEWS (b)<sup>73</sup> and one used the C-CHEWS<sup>68</sup>. One study did not report the  
20 PTTT used<sup>62</sup>, while ten studies used a variety of calling criteria and local modifications to  
21 validated tools that had not been evaluated for validity<sup>15-18,61,64,67,69,70,72</sup>.  
22  
23

#### 24 *Mortality (ward or hospital wide)*

25  
26 Two uncontrolled before-after studies (both with MET/RRT) reported significant mortality  
27 rate reductions post intervention: one in hospital wide deaths per 100 discharges<sup>17</sup> (RR=0.82,  
28 95% CI=0.70-0.95) and one in total hospital deaths per 1,000 admissions (RR=0.65, 0.57-  
29 0.75) and deaths on the ward ('unexpected deaths') per 1,000 admissions<sup>63</sup> (RR=0.35, 0.13-  
30 0.92). Seven studies found no reductions in mortality, including two high quality multi-centre  
31 studies<sup>13,15,61,64-66,74</sup>. Parshuram and colleagues conducted a cluster randomised trial and  
32 found no difference in all-cause hospital mortality rates between 10 hospitals randomly  
33 selected to receive an intervention centred around use of the Bedside PEWS and 11 usual  
34 care hospitals, one year post intervention (OR=1.01, 0.61-1.69)<sup>65</sup>. Kutty *et al.* assessed the  
35 impact of MET implementation in 38 US paediatric hospitals with an interrupted time series  
36 study, and reported no difference in the slope of hospital mortality rates five years post  
37 intervention and the expected slope based on pre-implementation trends (OR = 0.94, 0.93-  
38 0.95)<sup>74</sup>.  
39  
40

#### 41 *PICU mortality*

42  
43 Two uncontrolled before-after studies (both with MET/RRT) reported a significant post-  
44 intervention reduction in rates of PICU mortality among ward transfers (RR=0.31, 0.13-  
45 0.72)<sup>18</sup>, and PICU mortality rates among patients readmitted within 48 hours (RR=0.43, 0.17-  
46 0.99)<sup>64</sup>. Six studies (including a high quality cluster randomised trial and interrupted time  
47  
48  
49  
50  
51  
52  
53  
54  
55  
56  
57  
58  
59  
60

series study) reported no post-intervention change in PICU mortality using a variety of metrics<sup>65-70</sup>.

### *Cardiac and respiratory arrests*

Two uncontrolled before-after studies (both with RRT/MET) reported significant post-intervention rate reductions in sub-categories of cardiac arrests: one in 'near cardiopulmonary arrests'<sup>64</sup> (RR=0.54, 0.52-0.57) but not 'actual cardiopulmonary arrests' and one in 'preventable cardiac arrests'<sup>63</sup> (RR=0.45, 0.20-0.97) but not 'unexpected cardiac arrests'. One uncontrolled before-after study (with RRT/MET) reported a significant post intervention reduction in rates of ward respiratory arrests per 1,000 patient-days<sup>16</sup> (RR=0.27, 0.07-0.95). Seven studies (including one high quality cluster randomised trial and one high quality interrupted time series study) found no change in cardiac arrest rates using a variety of metrics<sup>13,15,16,62,65,66</sup> or cardiac and respiratory arrests combined<sup>61</sup>.

### *Calls for urgent review / assistance*

Two uncontrolled before-after studies (all with RRT/MET) reported significant post-intervention reductions in rates of code calls<sup>17,64</sup> (RR=0.29, 0.10-0.65; RR=0.71, 0.61-0.83) while three studies found no change in rates of code calls<sup>15,18,73</sup>. One uncontrolled before-after study in a community hospital (without RRT/MET) found significant post intervention reductions in rates of urgent calls to the in-house paediatrician (RR=0.23, 0.11-0.46) and respiratory therapist<sup>71</sup> (RR=0.36, 0.13-0.95). Two uncontrolled before-after studies (with RRT/MET) found increases in rates of RRT calls<sup>73</sup> (RR=1.59, 1.33-1.90) and outreach team calls<sup>67</sup> (RR=1.92, 1.79-2.07). One study found no change in rates of RRT calls<sup>72</sup>.

### *PICU transfers*

One uncontrolled before-after study (without RRT/MET) found a significant post-intervention decrease in the rate of unplanned PICU transfers per 1,000 patient-days<sup>68</sup> (RR=0.70, 0.56-0.88). Four studies (including one high quality cluster randomised trial and one high quality interrupted time series study) found no change in rates of PICU admissions post intervention<sup>65-67,71</sup>.

### *PICU outcomes*

Two studies, one interrupted time series and one multi-centre cluster randomised trial (both with RRT/MET), found significant reductions in rates of 'critical deterioration events' (life-sustaining interventions administered within 12 hours of PICU admission) relative to pre-



1  
2  
3 implementation trends and relative to control hospitals respectively (IRR=0.38, 0.20-0.75;  
4 OR=0.77, 0.61-0.97)<sup>65,66</sup>. One controlled before-after study (without RRT/MET) reported a  
5 significant reduction in rates of invasive ventilation given to emergency PICU admissions  
6 post intervention (RR=0.83, 0.72-0.97) with no significant change observed in a control  
7 group of patients admitted to PICU from outside of the hospital<sup>69</sup>. One uncontrolled before-  
8 after study reported a significant post-intervention decrease in rates of PICU admissions  
9 receiving mechanical ventilation (RR=0.85, 0.73-0.99) but an increase in rates of early  
10 intubation (RR=1.87, 1.33-2.62)<sup>70</sup>.

### 17 *Implementation outcomes*

19 Only three studies reported outcomes relating to the quality of implementation of the  
20 intervention. One study reported 99% of audited observation sets of the Bedside PEWS had  
21 at least 5 vital signs present post-intervention, up from 76% pre-intervention (no change in  
22 control hospitals)<sup>65</sup>. A previous study of the same PTTT reported 3% of audited cases had  
23 used the incorrect age chart but reported an intra-class coefficient of 0.90 for agreement  
24 between bedside nurses scoring the PTTT in practice and research nurses retrospectively  
25 assigned scores<sup>71</sup>. Finally, error rates in C-CHEWS scoring were reported to have reduced  
26 from an initial 47% to below 10% by the end of the study<sup>68</sup>.

## 34 **DISCUSSION**

36 This paper reviewed the published PTTT and early warning system literature in order to  
37 assess the validity of PTTT for predicting in-patient deterioration (Question 1) and the  
38 effectiveness of early warning system interventions (with or without PTTT) for reducing  
39 mortality and morbidity outcomes in hospitalised children (Question 2). We believe that the  
40 consideration of broader 'early warning systems' differentiates this paper from previous  
41 reviews, as does the inclusion of two recently published high-quality effectiveness  
42 studies<sup>65,74</sup>.

### 49 **How well validated are existing tools for predicting in-patient deterioration?**

51 Given a growing understanding and emphasis on the importance of local context in  
52 healthcare interventions, it is perhaps not surprising that such a wide range of PTTT have  
53 been developed and evaluated internationally, and modifications to existing PTTT are  
54 common. The result, however, is that a large number of different PTTT have been narrowly  
55 validated, but none have been broadly validated across a variety of different settings and  
56  
57  
58  
59  
60

1  
2  
3 populations. With only one exception<sup>44</sup>, all studies evaluating the validity of PTTT have been  
4 single-centre reports from specialist units, greatly limiting the generalisability of the findings.  
5  
6 PTTT such as the Bedside PEWS, C&VPEWS, NHS III PEWS and C-CHEWS have  
7 demonstrated very good (AUROC  $\geq 0.80$ ) or excellent (AUROC  $\geq 0.90$ ) diagnostic accuracy,  
8 typically for predicting PICU transfers, in internal and external validation  
9 studies<sup>11,14,19,32,37,42,44,50</sup>. However, methodological issues common to the validation studies  
10 mean that such results need to be interpreted with a degree of caution. Firstly, each of the  
11 studies was conducted in a clinical setting where paediatric in-patients are subject to various  
12 forms of routine clinical intervention throughout their admission.. . There are numerous  
13 statistical modelling techniques which can account for co-occurrence of clinical interventions  
14 and the longitudinal nature of the predictors<sup>75,76</sup>, but none of these were used in the validation  
15 studies and so estimates of predictive ability are likely to be distorted. Indeed, the majority of  
16 outcomes used in the validation studies are clinical interventions themselves (e.g., PICU  
17 transfer). Secondly, while it is understandable that a majority of studies ‘bench-tested’ the  
18 PTTT rather than implement it into practice before evaluation, the process of abstracting  
19 PTTT scores retrospectively from patient charts and medical records introduces a number of  
20 sources of potential bias or inaccuracy. For instance, several studies reported either high  
21 levels of missing data (i.e., some of the observations required to populate the PTTT score  
22 being evaluated were not routinely collected or recorded and so were scored as  
23 ‘normal’)<sup>11,19,32,44,45</sup> or difficulty in abstracting certain descriptive or subjective PTTT  
24 components<sup>19,28,41,49</sup>. Assuming missing values are normal, or excluding some PTTT items  
25 for analysis are both likely to result in underscoring of the PTTT and skew the results.  
26 Finally, studies which evaluated a PTTT that had been implemented in practice are at risk of  
27 overestimating the ability of PTTT to predict proxy outcomes such as PICU transfer,  
28 inasmuch as high PTTT scores or triggers automatically direct staff towards escalation of  
29 care, or clinical actions which make escalation of care more likely.  
30  
31  
32  
33  
34  
35  
36  
37  
38  
39  
40  
41  
42  
43  
44  
45  
46  
47  
48

49 The findings reported in several PTTT studies point towards two potential challenges for  
50 some centres in implementing and sustaining a PTTT in clinical practice. As noted above, a  
51 number of studies that retrospectively ‘bench-tested’ a PTTT reported that the observations  
52 that were required to score the tool were not always routinely collected or recorded in their  
53 centre. It may be that the introduction of a PTTT into practice would help create a framework  
54 to ensure that core vital signs and observations were collected more routinely (as  
55 demonstrated by Parshuram and colleagues<sup>65</sup>) but this would obviously have resource  
56  
57  
58  
59  
60



1  
2  
3 implications that could be a potential barrier for some centres. Such considerations are  
4 important, as evidence from the adult literature points to the potential for tools to  
5 inadvertently mask deterioration when core observations are missing<sup>77</sup>. Secondly, PPV values  
6 reported in cohort studies, and case-control studies that adjusted for outcome prevalence,  
7 were uniformly low (between 2.3%-5.9%)<sup>14,19,31-33,47</sup>. They demonstrate that even PTTT  
8 which demonstrate good predictive performance are likely to generate a large amount of  
9 'false alarms' because adverse outcomes are so rare. For some centres, these issues may be  
10 mitigated to some extent by dedicated response teams or other available resources, but other  
11 hospitals may not be able to sustain the increased workload of responding to PTTT triggers.

### 12 **How effective are early warning systems for reducing mortality and morbidity?**

13 We found limited evidence for early warning system interventions reducing mortality or  
14 arrest rates in hospitalised children. While some effectiveness papers did report significant  
15 reductions in rates of mortality (on the ward or in PICU) or cardiac arrests after  
16 implementation of different early warning system interventions<sup>16-18,63,64</sup>, they were all  
17 uncontrolled before-after studies which have inherent limitations in terms of establishing  
18 causality. They do not preclude the possibility that outcome rates would have improved over  
19 time regardless of the intervention<sup>78</sup> or changes were caused by other factors, and their  
20 inclusion is accordingly discouraged by some Cochrane review groups<sup>79</sup>. Three high quality  
21 multi-centre studies - two interrupted time series studies and a recent cluster randomised trial  
22 – found no changes in rates or trends of mortality or arrests post intervention<sup>65,66,74</sup>.

23 There was also limited evidence for early warning systems reducing PICU transfers or calls  
24 for urgent review. Again, a small number of uncontrolled before-after studies reported  
25 significant reductions post-intervention<sup>15,17,64</sup>, but several other studies reported significant  
26 increases in transfers or calls for review<sup>67,73</sup> or no post-intervention changes. We did find  
27 moderate evidence across four studies – including a controlled before-after study, a multi-  
28 centre interrupted time series study and a multi-centre cluster randomised trial - for early  
29 warning system interventions reducing rates of early critical interventions in children  
30 transferred to PICU<sup>65,66,69,70</sup>. Such results are promising, but corresponding reductions in  
31 hospital or PICU mortality rates have not yet been reported.

32 Implementing complex interventions in a healthcare setting is challenging and evidence from  
33 the adult literature points to challenges and barriers to successfully implement TTT in  
34 practice<sup>80-82</sup>. However, given so few effectiveness studies reported on implementation  
35 outcomes, it is difficult to know whether negative findings reflect poor effectiveness or  
36

1  
2  
3 implementation of early warning systems. Again, effectiveness studies were predominantly  
4 carried out in specialist centres – and in all but three cases<sup>68,69,71</sup>, involved the use of a  
5 dedicated response team – which greatly limits the generalisability of findings outside of  
6 these contexts.  
7  
8  
9

### 10 *Limitations of the review*

11  
12 There are several limitations of the current review. Firstly, despite purposely widening the  
13 scope of the effectiveness review question to include paediatric ‘early warning systems’ with  
14 or without a PTTT, we identified very few studies that did not employ a PTTT as part of the  
15 intervention . In part, this likely reflects the fact that PTTT have become almost synonymous  
16 with early warning systems, but it is also possible that our search strategy may have missed  
17 some broader early warning system initiatives that were not explicitly labelled as such.  
18 Secondly, our inclusion criteria for study selection were deliberately broad and so resulted in  
19 our including several validation and effectiveness studies that were subsequently excluded  
20 from analysis due to insufficient statistical detail or methodological issues. Thirdly, the scope  
21 of the current review was limited to consideration of quantitative validation and effectiveness  
22 studies. We are mindful of research suggesting that implementing PTTT in practice may  
23 confer secondary benefits including, but not limited to improvements in communication,  
24 teamwork and empowerment of junior staff to call for assistance<sup>83–85</sup>. Finally, we opted not to  
25 conduct a meta-analysis of effectiveness findings due to the heterogeneity of outcome  
26 metrics, interventions and study designs, populations and settings. Given the large sample  
27 sizes required to detect changes in rare adverse events, we believe further work is needed to  
28 harmonise outcome measures used to evaluate early warning system interventions  
29 internationally, in order to facilitate pooling of findings across studies.  
30  
31  
32  
33  
34  
35  
36  
37  
38  
39  
40  
41  
42  
43

### 44 **Conclusion**

45  
46 The PTTT literature is currently characterised by an ‘absence of evidence’ rather than an  
47 ‘evidence of absence’. PTTT seem like a logical tool for helping staff detect and respond to  
48 deteriorating patients, but the existing evidence base is too limited to form clear judgements  
49 of their utility. We would argue that there has been too much confidence placed in the  
50 statistical findings of validation studies of PTTT, given methodological limitations in the  
51 study designs. There is evidence of consistently high false-alarm rates and bench-testing  
52 studies point to many PTTT parameters not being reliably recorded in practice: as such there  
53 is reason for caution in considering the viability of PTTT for all hospitals. Almost all of the  
54  
55  
56  
57  
58  
59  
60

1  
2  
3 early warning systems and PTTT reported in the literature have been developed and  
4 evaluated in specialist centres, typically in units with access to dedicated response teams –  
5 yet PTTT appear to be commonly adopted by non-specialist units with little modification.  
6  
7 There is currently limited evidence that ‘early warning systems’ incorporating a PTTT reduce  
8 deterioration or death in practice. As such, we would urge caution among policymakers in  
9 calling for their use to become mandatory across all hospitals. We acknowledge the potential  
10 for PTTT to confer a range of secondary benefits in areas such as communication, teamwork  
11 and empowerment of junior staff. More work is required to understand the wider impact of  
12 PTTT implementation in different clinical settings before it is possible to evaluate their  
13 overall contribution to the wider safety mechanisms and systems aimed at identifying and  
14 responding to deteriorating in paediatric patients.  
15  
16  
17  
18  
19  
20  
21  
22  
23  
24  
25  
26  
27  
28  
29  
30  
31  
32  
33  
34  
35  
36  
37  
38  
39  
40  
41  
42  
43  
44  
45  
46  
47  
48  
49  
50  
51  
52  
53  
54  
55  
56  
57  
58  
59  
60

## FOOTNOTES

### Contributors

RT: screening and review of papers, contribution to design of work, preparation of manuscript; CH: screening and review of papers, contribution to concept and design of work, review of manuscript; FL: contribution to design of work, screening and review of papers, review of manuscript; KH: contribution to concept and design of work, screening and review of papers, review of manuscript; CP, DR, BM, AO, DE, RS, GS, DL, LT, DA, AL, ETJ: contribution to concept and design of work, screening and review of papers, review of manuscript; MM: information specialist, review of manuscript.

### Acknowledgements

We would like to acknowledge the contribution of Dr James Bunn to the review.

### Competing interests

None declared.

### Funding

This study is funded by the National Institute for Health Research (NIHR) Health Services and Delivery Research (HS&DR) programme (12/178/17).

### Data sharing statement

No additional data are available.

1  
2  
3 **FIGURE LEGENDS**  
4

5 **Figure 1 – PRISMA flow diagram of study inclusion**  
6  
7  
8  
9  
10  
11  
12  
13  
14  
15  
16  
17  
18  
19  
20  
21  
22  
23  
24  
25  
26  
27  
28  
29  
30  
31  
32  
33  
34  
35  
36  
37  
38  
39  
40  
41  
42  
43  
44  
45  
46  
47  
48  
49  
50  
51  
52  
53  
54  
55  
56  
57  
58  
59  
60

For peer review only

## REFERENCES

1. Pearson, G. a (Ed). *Why Children Die: A Pilot Study 2006; England (South West, North East and West Midlands), Wales and Northern Ireland.* (2008). doi:ISBN: 978-0-9558055-0-9
2. Joint Commission. 2009 National Patient Safety Goals, Requirements and Rationales. *Jt. Comm. Perspect. Patient Saf.* **8**, 8–12 (2009).
3. Tume, L. The deterioration of children in ward areas in a specialist children’s hospital. *Nurs. Crit. Care* **12**, 12–19 (2007).
4. NICE. Acutely ill patients in hospital: Recognition of and response to acute illness in adults in hospital. *NICE Clin. Guidel.* **50** 1–107 (2007). doi:10.1136/bmj.39272.679688.47
5. Roland, D., Oliver, A., Edwards, E. D., Mason, B. W. & Powell, C. V. E. Use of paediatric early warning systems in Great Britain: has there been a change of practice in the last 7 years? *Arch. Dis. Child.* **99**, 26–9 (2014).
6. Chapman, S. M., Wray, J., Oulton, K. & Peters, M. J. Systematic review of paediatric track and trigger systems for hospitalised children. *Resuscitation* **109**, 87–109 (2016).
7. Lambert, V., Matthews, A., MacDonell, R. & Fitzsimons, J. Paediatric early warning systems for detecting and responding to clinical deterioration in children: a systematic review. *BMJ Open* **7**, e014497 (2017).
8. Moher, D., Liberati, A., Tetzlaff, J. & Altman, D. G. Preferred reporting items for systematic reviews and meta-analyses: the PRISMA statement. *BMJ* **339**, (2009).
9. Downs, S. H. & Black, N. The feasibility of creating a checklist for the assessment of the methodological quality both of randomised and non-randomised studies of health care interventions. *J. Epidemiol. Community Health* **52**, 377–384 (1998).
10. Monaghan, A. Detecting and managing deterioration in children. *Paediatr. Nurs.* **17**, 32–35 (2005).
11. Parshuram, C. S., Hutchison, J. & Middaugh, K. Development and initial validation of the Bedside Paediatric Early Warning System score. *Crit. Care* **13**, R135–R135 (2009).
12. Haines, C., Perrott, M. & Weir, P. Promoting care for acutely ill children - Development and evaluation of a Paediatric Early Warning Tool. *Intensive Crit. Care Nurs.* **22**, 73–81 (2006).
13. Tibballs, J., Kinney, S., Duke, T., Oakley, E. & Hennessy, M. Reduction of paediatric in-patient cardiac arrest and death with a medical emergency team: preliminary results. *Arch. Dis. Child.* **90**, 1148–1152 (2005).
14. Mason, B. W., Edwards, E. D., Oliver, A. & Powell, C. V. E. Cohort study to test the predictability of the NHS Institute for Innovation and Improvement Paediatric Early Warning System. *Arch. Dis. Child.* archdischild–2015–308465 (2016). doi:10.1136/archdischild-2015-308465
15. Brill, R. J. *et al.* Implementation of a medical emergency team in a large pediatric teaching hospital prevents respiratory and cardiopulmonary arrests outside the intensive care unit. *Pediatric Critical Care Medicine* **8**, 236–246 (2007).
16. Hunt, E. A. *et al.* Transition from a traditional code team to a medical emergency team

- and categorization of cardiopulmonary arrests in a children's center. *Arch. Pediatr. Adolesc. Med.* **162**, 117–122 (2008).
17. Sharek, P. J. *et al.* Effect of a rapid response team on hospital-wide mortality and code rates outside the ICU in a Children's Hospital. *JAMA* **298**, 2267–2274 (2007).
  18. Anwar-Ul-Haque, Saleem, A. F., Zaidi, S. & Haider, S. R. Experience of pediatric rapid response team in a tertiary care hospital in Pakistan. *Indian J. Pediatr.* **77**, 273–276 (2010).
  19. Zhai, H. *et al.* Developing and evaluating a machine learning based algorithm to predict the need of pediatric intensive care unit transfer for newly hospitalized children. *Resuscitation* **85**, 1065–1071 (2014).
  20. Garlick, J. *et al.* Modified pediatric early warning scores, a predictor of appropriate transfer to higher level of care. *Crit. Care Med.* **41**, A166–A167 (2013).
  21. Medar, S., Weingarten-Arams, J. & Katyal, C. Pediatric early warning score (PEWS) is a reliable predictor of rapid response team (RRT) call. *Crit. Care Med.* **43**, 228 (2015).
  22. Bell, D. *et al.* The texas children's hospital pediatric advanced warning score as a predictor of clinical deterioration in hospitalized infants and children: A modification of the pews tool. *J. Pediatr. Nurs.* **28**, (2013).
  23. McLellan, M. C. & Connor, J. A. The Cardiac Children's Hospital Early Warning Score (C-CHEWS). *J. Pediatr. Nurs.* **28**, 171–178 (2013).
  24. Rahman, Z. H. *et al.* Application of the burn center Pediatric Early Warning Score (PEWS) tool to clinical practice: A pilot validation study. *J. Burn Care Res.* **35**, S187 (2014).
  25. Hopkins, M., Rowan, C., Rigby, M. & Tori, A. PEWS score predicts the need for PICU transfer and critical care interventions. *Crit. Care Med.* **Conference**, 43rd Critical Care Congress of the Society of Crit (2013).
  26. Gawronski, O. *et al.* Bedside pews in an Italian pediatric bone marrow transplant unit: Preliminary results of a longitudinal retrospective chart review. *Intensive Care Med.* **39**, S130 (2013).
  27. Sefton, G., Lane, S. & Carrol, E. D. Performance of individual predictors of deterioration used in a paediatric early warning score. *Pediatr. Crit. Care Med.* **15**, 29–30 (2014).
  28. Robson, M.-A. J., Cooper, C. L., Medicus, L. a, Quintero, M. J. & Zuniga, S. a. Comparison of three acute care pediatric early warning scoring tools. *J. Pediatr. Nurs.* **28**, e33–41 (2013).
  29. Chapman, S. M. *et al.* 'The Score Matters': wide variations in predictive performance of 18 paediatric track and trigger systems. *Arch. Dis. Child. archdischild-2016-311088* (2017). doi:10.1136/archdischild-2016-311088
  30. Fuijkschot, J., Vernhout, B., Lemson, J., Draaisma, J. M. T. & Loeffen, J. L. C. M. Validation of a paediatric early warning score: First results and implications of usage. *Eur. J. Pediatr.* **174**, 15–21 (2015).
  31. Tucker, K. M., Brewer, T. L., Baker, R. B., Demeritt, B. & Vossmeier, M. T. Prospective evaluation of a pediatric inpatient early warning scoring system. *J. Spec. Pediatr. Nurs.* **14**, 79–85 (2009).



- 1
  - 2
  - 3
  - 4
  - 5
  - 6
  - 7
  - 8
  - 9
  - 10
  - 11
  - 12
  - 13
  - 14
  - 15
  - 16
  - 17
  - 18
  - 19
  - 20
  - 21
  - 22
  - 23
  - 24
  - 25
  - 26
  - 27
  - 28
  - 29
  - 30
  - 31
  - 32
  - 33
  - 34
  - 35
  - 36
  - 37
  - 38
  - 39
  - 40
  - 41
  - 42
  - 43
  - 44
  - 45
  - 46
  - 47
  - 48
  - 49
  - 50
  - 51
  - 52
  - 53
  - 54
  - 55
  - 56
  - 57
  - 58
  - 59
  - 60
32. Edwards, E. D., Powell, C. V, Mason, B. W. & Oliver, A. Prospective cohort study to test the predictability of the Cardiff and Vale paediatric early warning system. *Arch Dis Child* **94**, 602–606 (2009).
33. Edwards, E. D., Mason, B. W., Oliver, A. & Powell, C. V. E. Cohort study to test the predictability of the Melbourne criteria for activation of the medical emergency team. *Arch. Dis. Child.* **96**, 174–179 (2011).
34. O’Loughlin, K. *et al.* The effectiveness of the paediatric early warning tool (PEWT) in identifying children requiring admission to a critical care unit. *Arch. Dis. Child.* **97**, A154 (2012).
35. Wright, D., Sefton, G. & Horan, M. Charted observations and the use of a paediatric early warning tool did not predict the majority of cardio-respiratory arrest calls in a paediatric hospital. *Arch. Dis. Child.* **96**, A59 (2011).
36. Ahmed, M. *et al.* Burton paediatric early warning system score. *Arch. Dis. Child.* **97**, A421 (2012).
37. Mclellan, M. C., Gauvreau, K. & Connor, J. A. Validation of the cardiac children’s hospital early warning score: An early warning scoring tool to prevent cardiopulmonary arrests in children with heart disease. *Congenit. Heart Dis.* **9**, 194–202 (2014).
38. Clayson, R., Selby, A. & Tume, L. Is a paediatric early warning tool (PEWT) useful in cardiac patients? *Pediatr. Crit. Care Med.* **15**, 35–36 (2014).
39. Fenix, J. B., Gillespie, C. W., Levin, A. & Dean, N. Comparison of Pediatric Early Warning Score to Physician Opinion for Deteriorating Patients. *Hosp. Pediatr.* **5**, 474–479 (2015).
40. Mandell, I. M. *et al.* Pediatric Early Warning Score and unplanned readmission to the pediatric intensive care unit. *J. Crit. Care* **30**, 1090–1095 (2015).
41. A., A., P.W., F., N., S. & C., R.-G. Validation of a Pediatric Early Warning Score in Hospitalized Pediatric Oncology and Hematopoietic Stem Cell Transplant Patients. *Pediatr. Crit. Care Med.* **17**, e146–e153 (2016).
42. Agulnik, A. *et al.* Validation of a pediatric early warning system for hospitalized pediatric oncology patients in a resource-limited setting. *Cancer* **123**, 4903–4913 (2017).
43. Blackstone, B., Sharmila, A., Pienaar, A., Bevan, R. & Cheung, R. G453(P) ‘Between the flags’ paediatric early warning system is a sensitive tool to detect deterioration in children from district general hospitals admitted to paediatric intensive care. *Arch. Dis. Child.* **102**, A178 LP – A179 (2017).
44. Parshuram, C. S. *et al.* Multicentre validation of the bedside paediatric early warning system score: a severity of illness score to detect evolving critical illness in hospitalised children. *Crit Care* **15**, R184 (2011).
45. Akre, M. *et al.* Sensitivity of the pediatric early warning score to identify patient deterioration. *Pediatrics* **125**, e763–9 (2010).
46. Gawronski, O. *et al.* Accuracy of Bedside Paediatric Early Warning System (BedsidePEWS) in a Pediatric Stem Cell Transplant Unit. *J. Pediatr. Oncol. Nurs.* **33**, 249–256 (2016).
47. Duncan, H., Hutchison, J. & Parshuram, C. S. The pediatric early warning system score: A severity of illness score to predict urgent medical need in hospitalized



- children. *J. Crit. Care* **21**, 271–278 (2006).
48. Skaletzky, S. M., Raszynski, A. & Totapally, B. R. Validation of a modified pediatric early warning system score: a retrospective case-control study. *Clin. Pediatr. (Phila)*. **51**, 431–5 (2012).
49. Ross, C. *et al.* Sensitivity and specificity of a pediatric early warning system using data-driven vital signs. *Crit. Care Med.* **43**, 39 (2015).
50. Chapman, S. M. *et al.* ‘The Score Matters’: Wide variations in predictive performance of 18 paediatric track and trigger systems. *Arch. Dis. Child.* **102**, 487–495 (2017).
51. McLellan, M., Gauvreau, K. & Connor, J. A. Validation of the children’s hospital early warning scoring system for identifying hospitalized children at risk for arrest or ICU transfer. *Pediatr. Crit. Care Med.* **15**, 30 (2014).
52. Mistry, K. P., Turi, J., Hueckel, R., Mericle, J. M. & Meliones, J. N. Pediatric Rapid Response Teams in the Academic Medical Center. *Clin. Pediatr. Emerg. Med.* **7**, 241–247 (2006).
53. Demmel, K. M., Williams, L. & Flesch, L. Implementation of the pediatric early warning scoring system on a pediatric hematology/oncology unit. *J. Pediatr. Oncol. Nurs.* **27**, 229–240 (2010).
54. Sandhu, S. *et al.* 726 The Paediatric Early Warning Tool in Combination with a Nurse-Led Outreach Team: Impact on Outcomes for Critically Ill Children. *Pediatr Res* **68**, 368 (2010).
55. Randhawa, S., Roberts-Turner, R., Woronick, K. & DuVal, J. Implementing and Sustaining Evidence-Based Nursing Practice to Reduce Pediatric Cardiopulmonary Arrest. *West. J. Nurs. Res.* **33**, 443–456 (2010).
56. Camacho, E. A., Holman, D., Badgett, V., St. Peters, J. & Southworth, B. Modification of a Pediatric Early Warning Tool for Use With Patients in a Specialized Cardiac/Renal Unit. *J. Pediatr. Nurs.* **26**, e2–e3 (2011).
57. Heyden, M. V., Mudge, B. & Casella, S. Initiation of a dedicated pediatric rapid response team reduces cardiopulmonary arrests outside of the intensive care unit in a small children’s hospital. *Crit. Care Med.* **40**, 147 (2012).
58. Norville, R., Wills-Bagnato, P., Staton, S. & Kennedy-Nasser, A. Improvement in early recognition of deteriorating pediatric bone marrow transplant patients. *Biol. Blood Marrow Transplant.* **19**, S173 (2013).
59. Ambati, S. R., Sweberg, T., Silver, P. & Gangadharan, S. Effect of simulation based curriculum on the utilization of rapid response team activations (RRT). *Crit. Care Med.* **42**, A1432 (2014).
60. Ochoi, T., Downing, E., Rzeskiewicz, A., Pang, R. & Broughton, S. Impact of the Bedside PEWS on early detection of deteriorating patients. *Arch. Dis. Child.* **99**, A89–A90 (2014).
61. Zenker, P. *et al.* Implementation and impact of a rapid response team in a children’s hospital. *Jt. Comm. J. Qual. Patient Saf.* **33**, 418–425 (2007).
62. Hanson, C. C. *et al.* A reduction in cardiac arrests and duration of clinical instability after implementation of a paediatric rapid response system. *Postgrad. Med. J.* **86**, 314–318 (2010).
63. Tibballs, J. & Kinney, S. Reduction of hospital mortality and of preventable cardiac

- 1  
2  
3 arrest and death on introduction of a pediatric medical emergency team. *Pediatr. Crit.*  
4 *Care Med.* **10**, 306–312 (2009).  
5  
6 64. Kotsakis, A. *et al.* Implementation of a multicenter rapid response system in pediatric  
7 academic hospitals is effective. *Pediatrics* **128**, 72–78 (2011).  
8  
9 65. CS, P., Dryden-Palmer, K., Farrell, C. & al, et. Effect of a pediatric early warning  
10 system on all-cause mortality in hospitalized pediatric patients: The epoch randomized  
11 clinical trial. *JAMA* **319**, 1002–1012 (2018).  
12  
13 66. Bonafide, C. P. *et al.* Impact of Rapid Response System Implementation on Critical  
14 Deterioration Events in Children. *JAMA Pediatr.* **168**, 25 (2014).  
15  
16 67. Duns, N. *et al.* Introduction of a track and trigger system is associated with increased  
17 paediatric intensive care outreach utilisation and a trend towards improved patient  
18 outcomes in a tertiary children’s hospital. *Aust. Crit. Care* **27**, 61 (2014).  
19  
20 68. Agulnik, A. *et al.* Improved outcomes after successful implementation of a pediatric  
21 early warning system (PEWS) in a resource-limited pediatric oncology hospital.  
22 *Cancer* **123**, 2965–2974 (2017).  
23  
24 69. Sefton, G. *et al.* What impact did a Paediatric Early Warning system have on  
25 emergency admissions to the paediatric intensive care unit? An observational cohort  
26 study. *Intensive Crit. care Nurs.* **31**, 91–99 (2015).  
27  
28 70. Kolovos, N. S., Gill, J., Michelson, P. H., Doctor, A. & Hartman, M. E. Reduction in  
29 Mortality Following Pediatric Rapid Response Team Implementation. *Pediatr. Crit.*  
30 *Care Med.* 1 (2018). doi:10.1097/PCC.0000000000001519  
31  
32 71. Parshuram, C. S., Bayliss, A., Reimer, J., Middaugh, K. & Blanchard, N.  
33 Implementing the Bedside Paediatric Early Warning System in a community hospital:  
34 A prospective observational study. *Paediatr. Child Health* **16**, e18–22 (2011).  
35  
36 72. Panesar, R. *et al.* Characteristics and outcomes of pediatric rapid response teams  
37 before and after mandatory triggering by an elevated Pediatric Early Warning System  
38 (PEWS) score. *Hosp. Pediatr.* **4**, 135–140 (2014).  
39  
40 73. Douglas, K., Collado, J. C. & Keller, S. Implementation of a Pediatric Early Warning  
41 Scoring System at an Academic Medical Center. *Crit. Care Nurs. Q.* **39**, 363–370  
42 (2016).  
43  
44 74. Kutty, S. *et al.* Association of Pediatric Medical Emergency Teams With Hospital  
45 Mortality. *Circulation* **137**, 38–46 (2018).  
46  
47 75. Guerra, M. W., Shults, J., Amsterdam, J. & Ten-Have, T. The analysis of binary  
48 longitudinal data with time-dependent covariates. *Stat. Med.* **31**, 931–948 (2012).  
49  
50 76. Selig, J. P., Preacher, K. J. & Little, T. D. Modeling Time-Dependent Association in  
51 Longitudinal Data: A Lag as Moderator Approach. *Multivariate Behav. Res.* **47**, 697–  
52 716 (2012).  
53  
54 77. Clifton, D. A. *et al.* ‘Errors’ and omissions in paper-based early warning scores: the  
55 association with changes in vital signs—a database analysis. *BMJ Open* **5**, e007376  
56 (2015).  
57  
58 78. Joffe, A. R., Anton, N. R. & Burkholder, S. C. Reduction in hospital mortality over  
59 time in a hospital without a pediatric medical emergency team: limitations of before-  
and-after study designs. *Arch. Pediatr. Adolesc. Med.* **165**, 419–423 (2011).  
60  
79. Goodacre, S. Uncontrolled before-after studies: Discouraged by Cochrane and the

- 1  
2  
3 EMJ. *Emergency Medicine Journal* **32**, 507–508 (2015).  
4  
5 80. Niegsch, M., Fabritius, M. L. & Anheuser, J. Imperfect Implementation of an Early  
6 Warning Scoring System in a Danish Teaching Hospital: A Cross-Sectional Study.  
7 *PLoS One* **8**, (2013).  
8  
9 81. Hands, C. *et al.* Patterns in the recording of vital signs and early warning scores:  
10 Compliance with a clinical escalation protocol. *BMJ Qual. Saf.* **22**, 719–726 (2013).  
11  
12 82. Lydon, S., Byrne, D., Offiah, G. & Gleeson, L. A mixed-methods investigation of  
13 health professionals' perceptions of a physiological track and trigger system. *BMJ*  
14 *Qual.* 688–695 (2015). doi:10.1136/bmjqs-2015-004261  
15  
16 83. Bonafide, C. P. *et al.* Beyond statistical prediction: Qualitative evaluation of the  
17 mechanisms by which paediatric early warning scores impact patient safety. *J. Hosp.*  
18 *Med.* **8**, 248–253 (2013).  
19  
20 84. Ennis, L. Paediatric early warning scores on a children's ward: a quality improvement  
21 initiative. *Nurs. Child. Young People* **26**, 25–31 (2014).  
22  
23 85. Kaul, M. *et al.* Implementation of the Bedside Paediatric Early Warning System  
24 (BedsidePEWS) for nurse identification of deteriorating patients. *J. Spec. Pediatr.*  
25 *Nurs.* **19**, 339–349 (2014).  
26  
27  
28  
29  
30  
31  
32  
33  
34  
35  
36  
37  
38  
39  
40  
41  
42  
43  
44  
45  
46  
47  
48  
49  
50  
51  
52  
53  
54  
55  
56  
57  
58  
59  
60

**Table 2– summary of PTTTs**

| PTTT name (references)                                                                    | Development / modification details                                                                                                                                                                                                                               | Score / trigger | Choice of thresholds / parameters | Age-dependent thresholds? | No. of items in the tool* | PTTT parameters  |            |                               |                 |                   |                       |                |                         |      |               |             |                 |             | Other items                                                                                                                                                                                                              |
|-------------------------------------------------------------------------------------------|------------------------------------------------------------------------------------------------------------------------------------------------------------------------------------------------------------------------------------------------------------------|-----------------|-----------------------------------|---------------------------|---------------------------|------------------|------------|-------------------------------|-----------------|-------------------|-----------------------|----------------|-------------------------|------|---------------|-------------|-----------------|-------------|--------------------------------------------------------------------------------------------------------------------------------------------------------------------------------------------------------------------------|
|                                                                                           |                                                                                                                                                                                                                                                                  |                 |                                   |                           |                           | Respiratory rate | Heart rate | Respiratory effort / distress | LOC / behaviour | Oxygen saturation | Capillary refill time | Oxygen therapy | Systolic blood pressure | Pain | Staff concern | Skin colour | Airway problems | Temperature |                                                                                                                                                                                                                          |
| Paediatric Early Warning System (PEWS) score <sup>28,47</sup>                             | Developed for use in Canadian tertiary centre <sup>47</sup> . Nurse-generated candidate items reduced by focus groups/Delphi and evaluation with clinical dataset (code blue calls, n=87; controls, n=128). Development and validation datasets not independent. | Score           | Expert opinion                    | Yes                       | 16                        | ✓                | ✓          | ✓                             | ✓               | ✓                 | ✓                     | ✓              |                         |      |               | ✓           | ✓               | ✓           | Bolus fluid, medications, home oxygen, any previous admission to an ICU, central venous line in situ, transplant recipient, severe cerebral palsy, gastrostomy tube, greater than 3 medical specialties involved in care |
| Bedside Paediatric Early Warning Score (PEWS) <sup>11,19,25,26,28,44,46,60,65,66,71</sup> | Developed for use in US tertiary centre <sup>11</sup> . Routinely collected items assessed for discriminatory ability using clinical dataset (PICU admission, n=60; controls, n=120). Development and validation set not independent.                            | Score           | Expert opinion                    | Yes                       | 7                         | ✓                | ✓          | ✓                             | ✓               | ✓                 | ✓                     | ✓              |                         |      |               |             |                 |             |                                                                                                                                                                                                                          |
| Modified Bedside PEWS (a) <sup>30</sup>                                                   | Modification to Bedside PEWS for use in Dutch tertiary centre. Added temperature; modified wording of respiratory effort and oxygen therapy items.                                                                                                               | Score           | Expert opinion                    | Yes                       | 8                         | ✓                | ✓          | ✓                             | ✓               | ✓                 | ✓                     | ✓              |                         |      |               | ✓           |                 |             |                                                                                                                                                                                                                          |
| Modified Bedside PEWS (b) <sup>49</sup>                                                   | Modification to Bedside PEWS for use in US tertiary centre. Changed normal thresholds for HR and RR based on analysis of local clinical data.                                                                                                                    | Score           | HR / RR data driven               | Yes                       | 7                         | ✓                | ✓          | ✓                             | ✓               | ✓                 | ✓                     | ✓              |                         |      |               |             |                 |             |                                                                                                                                                                                                                          |
| Brighton PEWS <sup>10,55</sup>                                                            | Initial development for use in UK tertiary centre. Adapted from existing adult scores, but amended based on local clinical consensus. Small audit of patients (n=30) described but no formal validation.                                                         | Score           | Expert opinion                    | No                        | 5                         | ✓                | ✓          | ✓                             | ✓               | ✓                 | ✓                     |                |                         |      | ✓             |             |                 |             | ¼ hourly nebulisers, persistent vomiting post-surgery                                                                                                                                                                    |



|                                           |                                                                                         |                                                                                                                                                                                                                                                                                                   |         |                |     |    |   |   |   |   |   |   |   |   |   |   |   |   |   |   |                                                                                                                     |
|-------------------------------------------|-----------------------------------------------------------------------------------------|---------------------------------------------------------------------------------------------------------------------------------------------------------------------------------------------------------------------------------------------------------------------------------------------------|---------|----------------|-----|----|---|---|---|---|---|---|---|---|---|---|---|---|---|---|---------------------------------------------------------------------------------------------------------------------|
| 1<br>2<br>3<br>4<br>5<br>6<br>7<br>8<br>9 | Children's Hospital Cardiac Early Warning Score (C-CHEWS)<br><small>23,41,42,68</small> | Modification of Brighton PEWS for cardiac ward of a US tertiary centre. Altered O2 therapy thresholds; added items to Behaviour, Resp. and Cardiovascular categories; added family & staff concern; added age-related thresholds; removed nebs and vomiting items; modified escalation algorithm. | Score   | Expert opinion | Yes | 5  | ✓ | ✓ | ✓ | ✓ | ✓ | ✓ | ✓ | ✓ | ✓ | ✓ | ✓ | ✓ | ✓ | ✓ |                                                                                                                     |
| 10<br>11<br>12<br>13<br>14                | Burn-specific PEWS <sup>24</sup>                                                        | Modification of Brighton PEWS, for use in a specialist Burn Centre of a US tertiary centre. Added temperature; added intake and output scoring items; added Skin component.                                                                                                                       | Score   | Expert opinion | No  | 6  | ✓ | ✓ | ✓ | ✓ | ✓ | ✓ | ✓ | ✓ | ✓ | ✓ | ✓ | ✓ | ✓ | ✓ | Intake; outputs; skin                                                                                               |
| 15<br>16<br>17<br>18<br>19                | Children's Hospital Los Angeles (CHLA) PEWS <sup>40</sup>                               | Modification of Brighton PEWS for use in a US tertiary centre. Added medical history scoring item; added single ventricle physiology scoring item; changed O2 therapy thresholds; added items to Resp. category.                                                                                  | Score   | Expert opinion |     | 4  | ✓ | ✓ | ✓ | ✓ | ✓ | ✓ | ✓ | ✓ | ✓ | ✓ | ✓ | ✓ | ✓ | ✓ | RRT, code blue, or transfer from/to PICU in past 2 weeks; single ventricle physiology; any assisted ventilation     |
| 20<br>21<br>22<br>23<br>24                | Melbourne Activation Criteria (MAC) <sup>3,13,33,63</sup>                               | Initial development for use in an Australian tertiary centre to activate MET. Adapted from adult MET calling criteria, using age-appropriate thresholds. No formal validation study reported.                                                                                                     | Trigger | Expert opinion | Yes | 9  | ✓ | ✓ | ✓ | ✓ | ✓ | ✓ | ✓ | ✓ | ✓ | ✓ | ✓ | ✓ | ✓ | ✓ | Cardiac or respiratory arrest                                                                                       |
| 25<br>26<br>27<br>28                      | Modified MAC <sup>64</sup>                                                              | Modification of MAC for use in a Canadian tertiary centre, to activate a RRS. Removed cardiac / respiratory arrest outcome. No formal validation study reported.                                                                                                                                  | Trigger | Expert opinion | Yes | 8  | ✓ | ✓ | ✓ | ✓ | ✓ | ✓ | ✓ | ✓ | ✓ | ✓ | ✓ | ✓ | ✓ | ✓ |                                                                                                                     |
| 29<br>30<br>31<br>32<br>33                | Cardiff & Vale Paediatric Early Warning Score (C&VPEWS) <sup>32,33</sup>                | Modification of MAC for evaluation in a UK tertiary centre. Removed cardiac / respiratory arrest outcome; altered thresholds of some items; evaluated as aggregate score rather than single-item trigger.                                                                                         | Score   | Expert opinion | Yes | 8  | ✓ | ✓ | ✓ | ✓ | ✓ | ✓ | ✓ | ✓ | ✓ | ✓ | ✓ | ✓ | ✓ | ✓ |                                                                                                                     |
| 34<br>35<br>36<br>37<br>38<br>39<br>40    | Bristol Paediatric Early Warning Tool (PEWT)<br><small>3,12,28,34,35</small>            | Initial development for use in a UK tertiary centre. Initial candidate items drawn from un-validated Plymouth tool – retrospectively evaluated for ability to predict adverse events among cases (n=360, HDU or PICU transfers). Development and validation dataset not independent.              | Trigger | APLS values    | Yes | 14 | ✓ | ✓ | ✓ | ✓ | ✓ | ✓ | ✓ | ✓ | ✓ | ✓ | ✓ | ✓ | ✓ | ✓ | Required nebulised adrenaline; hyperkalaemia; suspected meningococcus; diabetic ketoacidosis; persistent convulsion |

|                                                                      |                                                                                |                                                                                                                                                                                                                                                                                        |         |                     |         |    |   |   |   |   |   |   |   |   |   |   |   |   |                                                                                                                                 |                                                                                                                                 |
|----------------------------------------------------------------------|--------------------------------------------------------------------------------|----------------------------------------------------------------------------------------------------------------------------------------------------------------------------------------------------------------------------------------------------------------------------------------|---------|---------------------|---------|----|---|---|---|---|---|---|---|---|---|---|---|---|---------------------------------------------------------------------------------------------------------------------------------|---------------------------------------------------------------------------------------------------------------------------------|
| 1<br>2<br>3<br>4<br>5<br>6<br>7<br>8<br>9                            | Modified Bristol PEWT (a) <sup>69</sup>                                        | Modification of Bristol PEWT for a UK tertiary centre. Adjusted wording of Airway parameters; added respiratory items; added AVPU evaluation; removed suspected meingococcus and diabetic ketoacidosis; added ph<7.2 and unresolved pain. No formal validation study reported.         | Trigger | APLS values         | Yes     | 14 | ✓ | ✓ | ✓ | ✓ | ✓ | ✓ | ✓ | ✓ | ✓ | ✓ | ✓ | ✓ | ✓                                                                                                                               | Required nebulised adrenaline or no improvement after nebulisers; pH<7.2; unresolved pain or current analgesic therapy; fitting |
| 10<br>11<br>12<br>13<br>14<br>15<br>16                               | Modified Bristol PEWT (b) <sup>38</sup>                                        | Modification of Bristol PEWT for cardiac ward of a UK tertiary centre. Amended HR and RR thresholds. Adjusted wording of Airway parameters; added respiratory items; added AVPU evaluation; removed suspected meingococcus and diabetic ketoacidosis; added ph<7.2 and unresolved pain | Trigger | HR / RR data driven | Yes     | 14 | ✓ | ✓ | ✓ | ✓ | ✓ | ✓ | ✓ | ✓ | ✓ | ✓ | ✓ | ✓ | Required nebulised adrenaline or no improvement after nebulisers; pH<7.2; unresolved pain or current analgesic therapy; fitting |                                                                                                                                 |
| 17<br>18<br>19<br>20<br>21                                           | NHS Institute for Innovation and Improvement (NHS III) PEWS <sup>14</sup>      | Designed as part of a NHS Institute fellowship project. Adapted from adult scores and Brighton PEWS. No formal development or internal validation study published.                                                                                                                     | Score   | APLS values         | Yes     | 6  | ✓ | ✓ | ✓ | ✓ | ✓ | ✓ | ✓ | ✓ | ✓ | ✓ | ✓ | ✓ |                                                                                                                                 |                                                                                                                                 |
| 22<br>23<br>24<br>25<br>26<br>27<br>28                               | Paediatric Medical Emergency Team (PMET) triggering criteria (a) <sup>15</sup> | Initial development for use in a US tertiary centre to activate a MET. Retrospective chart review of case patients (n=44, code calls) used to generate candidate items. Clinical judgement used to select final items. No formal validation of final tool reported.                    | Trigger | Expert opinion      | No      | 4  |   |   | ✓ | ✓ | ✓ |   |   |   |   |   |   |   | ✓                                                                                                                               | Worsening retractions; cyanosis                                                                                                 |
| 29<br>30<br>31<br>32<br>33<br>34                                     | Paediatric Medical Emergency Team (PMET) triggering criteria (b) <sup>16</sup> | Initial development for use in a US tertiary centre to activate a MET. Minimal description of tool development – authors deliberately chose broad criteria and categories of illness rather than specific vital signs. No formal validation study reported.                            | Trigger | Expert opinion      | Unclear | 12 | ✓ | ✓ | ✓ | ✓ | ✓ |   |   |   |   |   |   |   | ✓                                                                                                                               | Cardiac or respiratory arrest; seizures with apnoea; progressive lethargy; circulatory compromise/acute shock syndrome          |
| 35<br>36<br>37<br>38<br>39<br>40<br>41<br>42<br>43<br>44<br>45<br>46 | Paediatric Rapid Response Team (PRRT) triggering criteria (a) <sup>17</sup>    | Initial development for use in a US tertiary centre, to activate a RRT. Triggering items elected through expert consensus locally – reference to similarity to MAC and PMET triggering criteria (a). No formal validation study reported.                                              | Trigger | Expert opinion      | No      | 6  | ✓ | ✓ | ✓ | ✓ |   |   |   |   | ✓ |   |   |   | ✓                                                                                                                               |                                                                                                                                 |



1  
2  
3  
4  
5  
6  
7  
8  
9  
10  
11  
12  
13  
14  
15  
16  
17  
18  
19  
20  
21  
22  
23  
24  
25  
26  
27  
28  
29  
30  
31  
32  
33  
34  
35  
36  
37  
38  
39  
40  
41  
42  
43  
44  
45  
46

|                                                                                                                                                                                                                                                                                                                                                                                                                                                                                                                                                                                                                             |                                                                                                                                                                                                                                                                                                           |         |                |     |    |   |   |   |   |   |   |  |  |  |  |  |  |  |  |  |  |  |  |   |  |  |  |                                                                |  |  |
|-----------------------------------------------------------------------------------------------------------------------------------------------------------------------------------------------------------------------------------------------------------------------------------------------------------------------------------------------------------------------------------------------------------------------------------------------------------------------------------------------------------------------------------------------------------------------------------------------------------------------------|-----------------------------------------------------------------------------------------------------------------------------------------------------------------------------------------------------------------------------------------------------------------------------------------------------------|---------|----------------|-----|----|---|---|---|---|---|---|--|--|--|--|--|--|--|--|--|--|--|--|---|--|--|--|----------------------------------------------------------------|--|--|
| Paediatric Rapid Response Team (PRRT) triggering criteria (b) <sup>18</sup>                                                                                                                                                                                                                                                                                                                                                                                                                                                                                                                                                 | Initial development for use in calling RRT team in a tertiary centre in Pakistan. Minimal explanation for selection of calling criteria. No formal validation study reported in the literature.                                                                                                           | Trigger | Unclear        | Yes | 8  | ✓ | ✓ | ✓ | ✓ | ✓ |   |  |  |  |  |  |  |  |  |  |  |  |  |   |  |  |  | Convulsion                                                     |  |  |
| Logistic regression algorithm <sup>19</sup>                                                                                                                                                                                                                                                                                                                                                                                                                                                                                                                                                                                 | Initial development based on data mining of electronic health records in US tertiary-centre. Extracted 24 hours of clinical data from inpatients (n=6,722 controls, 526 PICU transfers) and used logistic regression model to select 29 item tool. Validation performed on subset of development dataset. | Score   | Expert opinion | Yes | 29 | ✓ | ✓ | ✓ | ✓ | ✓ | ✓ |  |  |  |  |  |  |  |  |  |  |  |  | ✓ |  |  |  | Acuity level (local measure); tissue perfusion and oxygenation |  |  |
| <p>* Multiple parameters are often required to be collected for each scoring item/category, e.g., scoring the 'Cardiovascular' category in the Brighton PEWS requires collection / evaluation of heart rate, skin colour and capillary refill time</p> <p>† Denotes a study included in the effectiveness review</p> <p>PTTS: Paediatric Track and Trigger Tool; PICU: Paediatric Intensive Care Unit; PHDU: Paediatric High-Dependency Unit; HR: Heart rate; RR: Respiratory rate; APLS: Advanced Paediatric Life Support; AVPU: Alert, Voice, Pain, Responsive ; GCS: Glasgow Coma Scale; LOC: Level of consciousness</p> |                                                                                                                                                                                                                                                                                                           |         |                |     |    |   |   |   |   |   |   |  |  |  |  |  |  |  |  |  |  |  |  |   |  |  |  |                                                                |  |  |



Table 3 – summary of PTTT validation study outcomes

| PTTT                                         | First author, year           | Country | Study population | Study design                       | Number of centres | PTTT used in practice? | Internal / external validation study? | Outcome measures                                              | Sample size     | Score or trigger? | Score tested / maximum score | Which score used (frequency of scoring)?*   | AUROC | Sensitivity | Specificity | PPV  | NPV  | Notes on accuracy / reliability of scoring and missing data                                                                                         | Quality score (max = 24) |
|----------------------------------------------|------------------------------|---------|------------------|------------------------------------|-------------------|------------------------|---------------------------------------|---------------------------------------------------------------|-----------------|-------------------|------------------------------|---------------------------------------------|-------|-------------|-------------|------|------|-----------------------------------------------------------------------------------------------------------------------------------------------------|--------------------------|
| Paediatric Early Warning System (PEWS) score | Duncan 2006 <sup>47</sup>    | Canada  | All in-patients  | Case-control study (retrospective) | 1                 | No                     | Int                                   | Code blue call for actual or impending cardiopulmonary arrest | 215 (87 cases)  | S                 | 5 / 26                       | Max 24hrs before event (hourly)             | 0.90  | 78.0        | 95.0        | 4.2† |      | No details on data abstraction. 13% of eligible cases and 84% of eligible controls excluded due to incomplete clinical data.                        | 14                       |
|                                              | Robson 2013 <sup>28</sup>    | US      | All in-patients  | Case-control study (retrospective) | 1                 | No                     | Ext                                   | Code blue call                                                | 192 (96 cases)  | S                 | 5 / 32                       | Max 24hrs before event (6 hourly)           | 0.85  | 86.6        | 72.2        |      |      | Four researchers scored PTTT from 20 charts, inter-rater reliability of 0.95. No details on extent of missing data.                                 | 8                        |
|                                              | Chapman 2017 <sup>50</sup>   | UK      | All in-patients  | Case-control study (retrospective) | 1                 | No                     | Ext                                   | Death, arrest or unplanned PICU transfer                      | 608 (297 cases) | S                 | 7 / 32                       | Max 48hrs before event (per usual practice) | 0.82  | 70.0        | 75.0        | 72.6 | 72.0 | Data abstraction by single researcher. 36% of observation sets contained HR, RR, O2 Sats, systolic BP, temperature and assessment of consciousness. | 17                       |
| Bedside PEWS                                 | Parshuram 2009 <sup>11</sup> | Canada  | All in-patients  | Case-control study (retrospective) | 1                 | No                     | Int                                   | Urgent PICU transfer (without code blue call)                 | 180 (60 cases)  | S                 | 8 / 26                       | Max 24hrs before event (hourly)             | 0.91  | 82.0        | 93.0        |      |      | Availability of scoring items in medical records varied from 27% (cap refill time) to 93% (oxygen therapy).                                         | 21                       |



|                            |                                          |             |                      |                                    |   |     |     |                                                                           |                    |   |        |                                              |      |      |      |      |      |      |      |                                                                                                                                 |    |
|----------------------------|------------------------------------------|-------------|----------------------|------------------------------------|---|-----|-----|---------------------------------------------------------------------------|--------------------|---|--------|----------------------------------------------|------|------|------|------|------|------|------|---------------------------------------------------------------------------------------------------------------------------------|----|
| Modified Bedside PEWS (a)  | Fuijkschoot 2015 <sup>30</sup> (study 1) | Netherlands | Oncology ward        | Case-cohort study (retrospective)  | 1 | Yes | Int | Emergency medical intervention or reviewed by PICU staff or staff concern | 118 (15 cases)     | S | 8 / 28 | Unclear (minimum 8 hourly)                   |      |      |      |      |      | 73.0 |      | 41% of admissions excluded from study due to incomplete PTTT scores.                                                            | 10 |
|                            | Fuijkschoot 2015 <sup>30</sup> (study 2) | Netherlands | All in-patients      | Case-cohort study (retrospective)  | 1 | Yes | Int | PICU transfer                                                             | Unclear (24 cases) | S | 8 / 28 | Score 2-6hrs before event (minimum 8 hourly) |      |      |      |      |      | 66.6 |      | High rate of exclusions reported due to missing data.                                                                           | 10 |
|                            | Fuijkschoot 2015 <sup>30</sup> (study 3) | Netherlands | All in-patients      | Case-cohort study (prospective)    | 1 | Yes | Int | Emergency medical intervention                                            | Unclear (14 cases) | S | 8 / 28 | Unclear (minimum 8 hourly)                   |      |      |      |      |      | 100  |      | No details on missing data.                                                                                                     | 10 |
|                            | Chapman 2017 <sup>50</sup>               | UK          | All in-patients      | Case-control study (retrospective) | 1 | No  | Ext | Death, arrest or PICU transfer                                            | 608 (297 cases)    | S | 7 / 28 | Max 48hrs before event (per usual practice)  | 0.87 | 69.0 | 91.0 | 87.9 | 79.0 |      |      | See above.                                                                                                                      | 17 |
| Modified Bedside PEWS (b)  | Ross 2015 <sup>49</sup>                  | US          | All in-patients      | Case-control study (retrospective) | 1 | No  | Int | Urgent PICU transfer                                                      | 4628 (848 cases)   | S | 8 / 26 | Max during admission                         |      |      |      |      |      | 70.0 | 84.0 | No details on data abstraction. Respiratory effort category excluded due to difficulty abstracting. No details on missing data. | 9  |
| Modified Brighton PEWS (a) | Tucker 2008 <sup>31</sup>                | US          | General medical unit | Cohort study (prospective)         | 1 | Yes | Int | PICU transfer                                                             | 2,979 (51 cases)   | S | 3 / 11 | Max during admission (4 hourly)              | 0.89 | 90.2 | 74.4 | 5.8  | 99.8 |      |      | Intraclass coefficient of 0.92 reported for two bedside nurses scoring 55 patients. No details on missing data.                 | 14 |

|                            |                            |    |                                                                                                   |                                    |   |     |     |                                                            |                                                                                 |   |        |                                             |      |      |      |      |                                                                                                                                                             |                                                                                                                                                                                                                        |    |
|----------------------------|----------------------------|----|---------------------------------------------------------------------------------------------------|------------------------------------|---|-----|-----|------------------------------------------------------------|---------------------------------------------------------------------------------|---|--------|---------------------------------------------|------|------|------|------|-------------------------------------------------------------------------------------------------------------------------------------------------------------|------------------------------------------------------------------------------------------------------------------------------------------------------------------------------------------------------------------------|----|
|                            | Zhai 2014 <sup>49</sup>    | US | All in-patients                                                                                   | Case-control study (retrospective) | 1 | No  | Ext | Urgent PCU transfer within 24 hrs of admission             | 6,352 (53 cases)                                                                | S | 2 / 11 | Max 24hrs before event (hourly)             | 0.74 | 68.4 | 81.6 | 2.3  | Data extracted from electronic health records. Only included records with complete PEWS score: 64% of eligible cases and 51% of eligible controls excluded. | 17                                                                                                                                                                                                                     |    |
|                            | Fenix 2015 <sup>39</sup>   | US | PICU transfers among all in-patients (excluding haematology oncology, surgical and cardiac wards) | Case-control study (retrospective) | 1 | Yes | Ext | Non-elective PICU transfer followed by deterioration event | 97 PICU transfers (51 cases of PICU transfer followed by 'deterioration event') | S | 3 / 11 | Max during admission                        |      | 80.0 | 43.0 | 61.0 | 67.0                                                                                                                                                        | No details on missing data.                                                                                                                                                                                            | 15 |
| Modified Brighton PEWS (b) | Akre 2010 <sup>45</sup>    | US | All in-patients                                                                                   | Chart review study (retrospective) | 1 | No  | Int | Rapid response team call or code blue call                 | 186 cases (170 RRT calls, 16 code calls)                                        | S | 4 / 13 | Max 24 hrs before event (minimum 4 hourly)  |      | 85.5 |      |      |                                                                                                                                                             | Scores abstracted from charts by single nurse, having calibrated with advanced nurse practitioner. Categories scored missing if any items missing. 25% of charts missing behavioural state, 26% cardiovascular colour. | 14 |
|                            | Chapman 2017 <sup>50</sup> | UK | All in-patients                                                                                   | Case-control study (retrospective) | 1 | No  | Ext | Death, arrest or PICU transfer                             | 608 (297 cases)                                                                 | S | 4 / 13 | Max 48hrs before event (per usual practice) | 0.79 | 61.0 | 84.0 | 78.4 | 69.0                                                                                                                                                        | See above.                                                                                                                                                                                                             | 17 |

|                                                           |                              |    |                        |                                    |   |     |     |                                   |                   |   |         |                                             |      |      |      |      |      |                                                                                                                                                       |    |
|-----------------------------------------------------------|------------------------------|----|------------------------|------------------------------------|---|-----|-----|-----------------------------------|-------------------|---|---------|---------------------------------------------|------|------|------|------|------|-------------------------------------------------------------------------------------------------------------------------------------------------------|----|
| Modified Brighton PEWS (d)                                | Skaletzky 2012 <sup>48</sup> | US | Medical surgical wards | Case-control study (retrospective) | 1 | No  | Int | PICU transfer                     | 350 (100 cases)   | S | 2.5 / 9 | Max 48hrs before event (4 hourly)           | 0.81 | 62.0 | 89.0 |      |      | Data abstracted from medial charts and notes. Behaviour category abstracted from LOC. No details on missing data.                                     | 15 |
|                                                           | Chapman 2017 <sup>50</sup>   | UK | All in-patients        | Case-control study (retrospective) | 1 | No  | Ext | Death, arrest or PICU transfer    | 608 (297 cases)   | S | 4 / 9   | Max 48hrs before event (per usual practice) | 0.74 | 46.0 | 90.0 | 81.3 | 63.0 | See above.                                                                                                                                            | 17 |
| Children's Hospital Early Warning Score (CHEWS)           | McLellan 2014 <sup>51</sup>  | US | All in-patients        | Case-control study (retrospective) | 1 | Yes | Int | Arrest or unplanned PICU transfer | 1,136 (360 cases) | S | 4 / 12  | Max in admission (4 hourly)                 | 0.90 | 84.2 | 80.9 |      |      | No details on missing data.                                                                                                                           | 10 |
| Children's Hospital Cardiac Early Warning Score (C-CHEWS) | McLellan 2013 <sup>23</sup>  | US | Cardiovascular unit    | Case-control study (retrospective) | 1 | Yes | Int | Arrest or unplanned PICU transfer | 312 (64 cases)    | S | 3 / 12  | Max 18hrs before event (4 hourly)           | 0.86 | 95.3 | 76.2 | 50.8 | 98.4 | Study nurse and bedside nurses assessed scores for 37 patients, 67% agreement. No details on missing data.                                            | 9  |
|                                                           | Agulnik 2016 <sup>41</sup>   | US | Oncology unit          | Case-control study (retrospective) | 1 | Yes | Ext | Unplanned PICU transfer           | 330 (110 cases)   | S | 4 / 12  | Max 24 hours before event (4 hourly)        | 0.96 | 86.0 | 95.0 |      |      | PTTT scores abstracted by researcher. Did not abstract if vital signs were present but no PTTT score calculated by nurse. No details on missing data. | 14 |

|                                             |                            |           |                                             |                                    |   |     |     |                                                                                       |                 |   |        |                                                   |      |      |      |      |  |                                                                                                                                                                                                                                                          |    |
|---------------------------------------------|----------------------------|-----------|---------------------------------------------|------------------------------------|---|-----|-----|---------------------------------------------------------------------------------------|-----------------|---|--------|---------------------------------------------------|------|------|------|------|--|----------------------------------------------------------------------------------------------------------------------------------------------------------------------------------------------------------------------------------------------------------|----|
|                                             | Agulnik 2017 <sup>42</sup> | Guatemala | Oncology unit                               | Case-control study (retrospective) | 1 | Yes | Ext | Unplanned PICU transfer                                                               | 258 (129 cases) | S | 4 / 12 | Max 24hrs before event (3 hourly)                 |      |      | 91.0 | 88.0 |  | Researcher evaluated charts and calculated scores, reporting 14% error rate (PTTT score calculated incorrectly) and 3% omission rate (vital signs recorded but no PTTT score calculated). 1 out of 130 cases excluded due to missing PTTT documentation. | 16 |
| Children's Hospital Los Angeles (CHLA) PEWS | Mandell 2015 <sup>40</sup> | US        | In-patients discharged from PICU to ward    | Case-control study (retrospective) | 1 | Yes | Int | Early unplanned re-admission to PICU (within 48 hours of discharge from PICU to ward) | 189 (38 cases)  | S | 2 / 10 | First score assigned on ward, post PICU discharge | 0.71 | 76.0 | 56.0 |      |  | No details on missing data.                                                                                                                                                                                                                              | 12 |
| Melbourne Activation Criteria (MAC)         | Tume 2007 <sup>3</sup>     | UK        | In-patients with an unplanned PICU transfer | Chart review study (retrospective) | 1 | No  | Ext | Unplanned PICU transfer                                                               | 33 cases        | T | NA     | Unclear                                           |      |      | 87.8 |      |  | Data abstracted by two reviewers. Reference to "large number of missing records and observation charts".                                                                                                                                                 | 11 |
|                                             | Tume 2007 <sup>3</sup>     | UK        | In-patients with an unplanned PHDU transfer | Chart review study (retrospective) | 1 | No  | Ext | Unplanned PHDU transfer                                                               | 32 cases        | T | N/A    | Unclear                                           |      |      | 87.5 |      |  | See above.                                                                                                                                                                                                                                               | 11 |

|                                                         |                            |    |                                             |                                    |   |    |     |                                         |                  |   |       |                                                 |      |      |      |      |      |                                                                                                                                              |    |
|---------------------------------------------------------|----------------------------|----|---------------------------------------------|------------------------------------|---|----|-----|-----------------------------------------|------------------|---|-------|-------------------------------------------------|------|------|------|------|------|----------------------------------------------------------------------------------------------------------------------------------------------|----|
|                                                         | Edwards 2011 <sup>33</sup> | UK | All in-patients                             | Cohort study (retrospective)       | 1 | No | Ext | Death or unplanned PICU or HDU transfer | 1,000 (16 cases) | T | N/A   | Any trigger over admission (per usual practice) | 0.79 | 68.3 | 83.2 | 3.6  | 99.7 | Observation charts altered to include all PTTT parameters. 56% of records missing at least one component. Missing data assumed to be normal. | 17 |
|                                                         | Chapman 2017 <sup>50</sup> | UK | All in-patients                             | Case-control study (retrospective) | 1 | No | Ext | Death, arrest or PICU transfer          | 608 (297 cases)  | T | NA    | Max 48hrs before event (per usual practice)     | 0.71 | 93.0 | 49.0 | 64.0 | 88.0 | See above.                                                                                                                                   | 17 |
| Cardiff & Vale Paediatric Early Warning Score (C&VPEWS) | Edwards 2009 <sup>32</sup> | UK | All in-patients                             | Cohort study (prospective)         | 1 | No | Int | Death or unplanned PICU or HDU transfer | 1,000 (16 cases) | S | 2 / 8 | Max score during admission (per usual practice) | 0.86 | 69.5 | 89.9 | 5.9  | 99.7 | Observation charts altered to include all PTTT parameters. 56% of records missing at least one component. Missing data assumed to be normal. | 18 |
|                                                         | Chapman 2017 <sup>50</sup> | UK | All in-patients                             | Case-control study (retrospective) | 1 | No | Ext | Death, arrest or PICU transfer          | 608 (297 cases)  | S | 3 / 8 | Max 48hrs before event (per usual practice)     | 0.89 | 80.0 | 86.0 | 84.0 | 82.0 | See above.                                                                                                                                   | 17 |
| Bristol Paediatric Early Warning Tool (PEWT)            | Tume 2007 <sup>3</sup>     | UK | In-patients with an unplanned PICU transfer | Chart review (retrospective)       | 1 | No | Ext | Unplanned PICU transfer                 | 33 cases         | T | N/A   | Unclear                                         |      |      |      |      |      | See above.                                                                                                                                   | 11 |
|                                                         | Tume 2007 <sup>3</sup>     | UK | In-patients with an unplanned PHDU transfer | Chart review (retrospective)       | 1 | No | Ext | Unplanned PHDU transfer                 | 32 cases         | T | N/A   | Unclear                                         |      |      |      |      |      | See above.                                                                                                                                   | 11 |

|                                                             |                               |    |                 |                                    |   |     |     |                                         |                               |   |       |                                                      |      |      |      |      |            |                                                                                                                                              |    |
|-------------------------------------------------------------|-------------------------------|----|-----------------|------------------------------------|---|-----|-----|-----------------------------------------|-------------------------------|---|-------|------------------------------------------------------|------|------|------|------|------------|----------------------------------------------------------------------------------------------------------------------------------------------|----|
|                                                             | Wright 2011 <sup>35</sup>     | UK | All in-patients | Chart review (retrospective)       | 1 | Yes | Ext | Cardiac arrest                          | 55 cases                      | T | N/A   | If triggered 24hrs before event                      |      | 49.1 |      |      |            | One case excluded due to missing notes. No details on missing data.                                                                          | 11 |
|                                                             | O'Loughlin 2012 <sup>34</sup> | UK | All in-patients | Cohort study (prospective)         | 1 | Yes | Ext | PICU transfer                           | 331 (7 cases)                 | T | N/A   | Triggered during admission (12hrly)                  | 0.91 | 100  | 81.0 | 11.0 |            | No details on missing data.                                                                                                                  | 6  |
|                                                             | Robson 2013 <sup>28</sup>     | US | All in-patients | Case-control study (retrospective) | 1 | No  | Ext | Code blue call                          | 192 (96 cases)                | T | N/A   | Triggered 24hrs before event (6hrly)                 | 0.75 | 76.3 | 61.5 |      | See above. | 8                                                                                                                                            |    |
|                                                             | Chapman 2017 <sup>50</sup>    | UK | All in-patients | Case-control study (retrospective) | 1 | No  | Ext | Death, arrest or PICU transfer          | 608 (297 cases)               | T | N/A   | If triggered 48hrs before event (per usual practice) | 0.62 | 96.0 | 28.0 | 56.0 | 88.0       | See above.                                                                                                                                   | 17 |
| Modified Bristol Paediatric Early Warning Tool (PEWT) (b)   | Clayson 2014 <sup>38</sup>    | UK | Cardiac ward    | Cohort study (prospective)         | 1 | Yes | Int | 'A deteriorating patient'               | 126 (unclear number of cases) | T | N/A   | Unclear                                              |      |      | 12.5 | 97.0 |            | No details on missing data.                                                                                                                  | 5  |
| NHS Institute for Innovation and Improvement (NHS III) PEWS | Mason 2016 <sup>14</sup>      | UK | All in-patients | Cohort study (retrospective)       | 1 | No  | Ext | Death or unplanned PICU or HDU transfer | 1,000 (16 cases)              | S | 2 / 7 | Max score over admission (per usual practice)        | 0.88 | 80.0 | 81.0 | 4.3  | 99.7       | Observation charts altered to include all PTTT parameters. 56% of records missing at least one component. Missing data assumed to be normal. | 15 |



1  
2  
3  
4  
5  
6  
7  
8  
9  
10  
11  
12  
13  
14  
15  
16  
17  
18  
19  
20  
21  
22  
23  
24  
25  
26  
27  
28  
29  
30  
31  
32  
33  
34  
35  
36  
37  
38  
39  
40  
41  
42  
43  
44  
45  
46

|                                                            |                               |    |                             |                                    |   |     |     |                                                 |                  |   |        |                                             |      |      |      |      |      |                                                                                                                                                                       |    |
|------------------------------------------------------------|-------------------------------|----|-----------------------------|------------------------------------|---|-----|-----|-------------------------------------------------|------------------|---|--------|---------------------------------------------|------|------|------|------|------|-----------------------------------------------------------------------------------------------------------------------------------------------------------------------|----|
|                                                            | Chapman 2017 <sup>50</sup>    | UK | All in-patients             | Case-control study (retrospective) | 1 | No  | Ext | Death, arrest or PICU transfer                  | 608 (297 cases)  | S | 2 / 7  | Max 48hrs before event (per usual practice) | 0.82 | 83.0 | 65.0 | 69.6 | 80.0 | See above.                                                                                                                                                            | 17 |
| Logistic regression algorithm                              | Zhai 2014 <sup>19</sup>       | US | All in-patients             | Case-control study (retrospective) | 1 | No  | Ext | Urgent PICU transfer within 24 hrs of admission | 6,352 (53 cases) | S | > 0.5  | Max 24hrs before event (hourly)             | 0.91 | 84.9 | 85.9 | 4.8  |      | Data extracted from electronic health records. No details on extent of missing data but authors report that "missing data was a major cause of incorrect prediction". | 17 |
| Burton Paediatric Early Warning Score (BPEWS)              | Ahmed 2012 <sup>36</sup>      | UK | PICU admissions only        | Chart review (retrospective)       | 1 | Yes | Int | PICU admission                                  | 23               | S | 4 / 19 | Max 24hrs before event (unclear)            |      | 93.0 |      |      |      | Data extracted from case notes by two reviewers. No details on missing data.                                                                                          | 4  |
| 'Between the Flags' Paediatric Early Warning System (PEWS) | Blackstone 2017 <sup>43</sup> | UK | Urgent PICU admissions only | Chart review (retrospective)       | 1 | Yes | Ext | Urgent PICU admission                           | 100              | T | NA     | Unclear                                     |      | 91.0 |      |      |      | Data extracted from health records. No details on missing data.                                                                                                       | 8  |

1  
2  
3 All studies conducted in a specialist / tertiary centre.  
4

5 PPV and NPV values in italics represent results from case-control studies – these values are misleading in isolation because they assume that the wider prevalence rate of the adverse event is equal to the case to  
6 control ratio used in the research study (e.g., if the researchers studied 300 cases and 300 controls, the prevalence rate of adverse events for the calculation of PPV is 50%). As per the cohort studies, prevalence  
7 rates of critical events are typically far lower among hospitalised paediatric populations than the case/control ratios used in studies, and so PPV values would be considerably lower in clinical practice.

8 Studies classified as internal validation if the setting for the study was the same hospital and same research team as those who developed the score. Studies classified as external validation if the score was tested in  
9 a different centre and by a different research team to those who developed it.

10 \* Typically, study researchers collected or abstracted multiple PTTT scores for each patient at different time points, but can only use one score per patient for the analysis of the tool's predictive ability. This column  
11 specifies which score the researchers used. In most cases, the study team used the maximum PTTT score recorded for each patient in a given study window – e.g., 24 hours prior to a critical event for case patients.  
12 The text in parentheses describes the frequency with which scores were assessed or abstracted for each patient, if this information was described in the paper.

13  
14 † Case-control study, but PPV value calculated based on clinical prevalence of event as measured at local centre during the study

15 PTTT, paediatric track and trigger tool; S, score; T, trigger; AUROC, area under the receiver operating characteristic curve; PPV, positive predictive value, NPV, negative predictive value; PICU, paediatric intensive  
16 care unit; PHDU, paediatric high-dependency unit; RRT, rapid response team; HFNC, high flow nasal cannula; UK, United Kingdom; US, United States; Int, Internal validation; Ext, external validation  
17  
18  
19  
20  
21  
22  
23  
24  
25  
26  
27  
28  
29  
30  
31  
32  
33  
34  
35  
36  
37  
38  
39  
40  
41  
42  
43  
44  
45  
46

1  
2  
3  
4  
5  
6  
7  
8  
9  
10  
11  
12  
13  
14  
15  
16  
17  
18  
19  
20  
21  
22  
23  
24  
25  
26  
27  
28  
29  
30  
31  
32  
33  
34  
35  
36  
37  
38  
39  
40  
41  
42  
43  
44  
45  
46

**Table 4 – summary of early warning system effectiveness study outcome**

| Outcome                                                                   | First author, year          | Intervention           |                           |                             |                            | PTTT                                                      | Country   | Number of centres | Specialist unit? | Existing RRT / MET? | Population      | Study design                                  | Study duration in months | Events before, n (rate) | Events after, n (rate) | Effect size (95% CI)    | P Value     | Quality score (max = 26) |
|---------------------------------------------------------------------------|-----------------------------|------------------------|---------------------------|-----------------------------|----------------------------|-----------------------------------------------------------|-----------|-------------------|------------------|---------------------|-----------------|-----------------------------------------------|--------------------------|-------------------------|------------------------|-------------------------|-------------|--------------------------|
|                                                                           |                             | Implemented a new PTTT | Implemented new RRT / MET | Modified escalation process | Staff training / education |                                                           |           |                   |                  |                     |                 |                                               |                          |                         |                        |                         |             |                          |
| <b>MORTALITY</b>                                                          |                             |                        |                           |                             |                            |                                                           |           |                   |                  |                     |                 |                                               |                          |                         |                        |                         |             |                          |
| Deaths on ward (per 1,000 admissions)                                     | Tibballs 2005 <sup>13</sup> | ✓                      | ✓                         | ✓                           |                            | Melbourne Activation Criteria (MAC)                       | Australia | 1                 | Y                | N                   | All in-patients | Uncontrolled before-after study (prospective) | 53 (41 before, 12 after) | 13 (0.12)               | 2 (0.06)               | RR = 0.45 (0.10-1.99) † | 0.29        | 10                       |
| Hospital-wide deaths (per 100 discharges)                                 | Sharek 2007 <sup>17</sup>   | ✓                      | ✓                         | ✓                           |                            | Paediatric Rapid Response Team (PRRT) triggering criteria | US        | 1                 | Y                | N                   | All in-patients | Uncontrolled before-after study (prospective) | 84 (67 before, 17 after) | 547 (1.01)              | 158 (0.83)             | RR = 0.82 (0.70-0.95)   | <b>.007</b> | 15                       |
| Hospital wide deaths, excluding neonate ICU and ED (per 1,000 discharges) | Zenker 2007 <sup>61</sup>   | ✓                      | ✓                         |                             |                            | RRT activation criteria*                                  | US        | 1                 | Y                | N                   | All in-patients | Uncontrolled before-after study (prospective) | 34 (23 before, 11 after) | 97 (4.30)               | 52 (4.45)              | RR=1.04 (0.74-1.45) †   | .57         | 12                       |

|                                                     |                              |   |   |   |                                                                  |                                                                    |        |   |   |                 |                                                 |                               |                                              |                                               |                            |         |    |
|-----------------------------------------------------|------------------------------|---|---|---|------------------------------------------------------------------|--------------------------------------------------------------------|--------|---|---|-----------------|-------------------------------------------------|-------------------------------|----------------------------------------------|-----------------------------------------------|----------------------------|---------|----|
| Deaths outside ICU (per 1,000 non-ICU patient-days) | Brilli 2007 <sup>15</sup>    | ✓ | ✓ | ✓ | Paediatric Medical Emergency Team (PMET) triggering criteria (a) | US                                                                 | 1      | Y | N | All in-patients | Uncontrolled before-after study (prospective)   | 27<br>(15 before, 12 after)   | 9<br>(0.10)                                  | 2<br>(0.04)                                   | RR=0.39<br>(0.08-1.80) †   | .13     | 14 |
| Ward death rate (per 1,000 ward admissions)         | Hanson 2010 <sup>62</sup>    | ✓ | ✓ | ✓ | Not described                                                    | US                                                                 | 1      | Y | N | All in-patients | Uncontrolled before-after study (retrospective) | 36<br>(24 before, 12 after)   | 13<br>(1.50)                                 | 2<br>(0.45)                                   | RR = 0.30<br>(0.07-1.31) † | .07     | 18 |
| Total hospital deaths (per 1,000 admissions)        | Tibballs 2009 <sup>63</sup>  | ✓ | ✓ | ✓ | Melbourne Activation Criteria (MAC)                              | Australia                                                          | 1      | Y | N | All in-patients | Uncontrolled before-after study (prospective)   | 89<br>(41 before, 48 after)   | 459<br>(4.38)                                | 398<br>(2.87)                                 | RR = 0.65<br>(0.57-0.75)   | < .0001 | 15 |
| Deaths on ward (per 1,000 admissions)               | Tibballs 2009 <sup>63</sup>  | ✓ | ✓ | ✓ | Melbourne Activation Criteria (MAC)                              | Australia                                                          | 1      | Y | N | All in-patients | Uncontrolled before-after study (prospective)   | 89<br>(41 before, 48 after)   | 13<br>(0.12)                                 | 6<br>(0.04)                                   | RR = 0.35<br>(0.13-0.92)   | .03     | 15 |
| All-cause hospital mortality (per 1,000 admissions) | Kotsakis 2011 <sup>64</sup>  | ✓ | ✓ | ✓ | Modified MAC                                                     | Canada                                                             | 4      | Y | N | All in-patients | Uncontrolled before-after study (prospective)   | 48<br>(24 before, 24 after)   | 553<br>(9.97)                                | 540<br>(9.65)                                 | RR = 0.97<br>(0.83-1.12)   | .65     | 18 |
| All cause hospital mortality (per 1,000 discharges) | Parshuram 2018 <sup>65</sup> | ✓ | ✓ | ✓ | Bedside PEWS                                                     | Belgium, Ireland, Netherlands, England, Italy, Canada, New Zealand | 2<br>1 | Y | N | All in-patients | Cluster randomised trial (prospective)          | 18<br>(6 pre, 12 post)        | Con:<br>61<br>(1.31)<br>Int:<br>52<br>(1.95) | Con:<br>147<br>(1.56)<br>Int:<br>97<br>(1.93) | OR=1.01<br>(0.61-1.69)     | .96     | 23 |
| Hospital mortality (per 1,000 admissions)           | Kutty 2018 <sup>74</sup>     | ✓ |   |   | NR                                                               | US                                                                 | 3<br>8 | Y | N | All in-patients | Interrupted Time Series (retrospective)         | 180<br>(60 before, 120 after) | NA                                           | NA                                            | OR=0.94<br>(0.93-0.95)     | .98     | 20 |
| <b>PICU MORTALITY</b>                               |                              |   |   |   |                                                                  |                                                                    |        |   |   |                 |                                                 |                               |                                              |                                               |                            |         |    |

|                                                                                         |                                    |   |   |  |   |                                                               |           |   |   |   |                 |                                                 |                             |               |              |                            |                |    |
|-----------------------------------------------------------------------------------------|------------------------------------|---|---|--|---|---------------------------------------------------------------|-----------|---|---|---|-----------------|-------------------------------------------------|-----------------------------|---------------|--------------|----------------------------|----------------|----|
| PICU mortality after PICU admission from ward (per PICU admission)                      | Anwar-al-Haque, 2010 <sup>18</sup> | ✓ | ✓ |  |   | Paediatric Rapid Response Team (PRRT) triggering criteria (b) | Pakistan  | 1 | Y | N | All in-patients | Uncontrolled before-after study (retrospective) | 18<br>(9 before, 9 after)   | 23<br>(51.11) | 5<br>(15.63) | RR = 0.31<br>(0.13-0.72) † | <b>.007+</b>   | 6  |
| PICU mortality after PICU readmission within 48 hrs of discharge (per 1,000 admissions) | Kotsakis 2011 <sup>64</sup>        | ✓ | ✓ |  |   | Modified MAC                                                  | Canada    | 4 | Y | N | All in-patients | Uncontrolled before-after study (prospective)   | 48<br>(24 before, 24 after) | 16<br>(0.29)  | 7<br>(0.13)  | RR = 0.43<br>(0.17-0.99)   | <b>&lt;.05</b> | 18 |
| PICU mortality after urgent PICU admission from ward (per 1,000 admissions)             | Kotsakis 2011 <sup>64</sup>        | ✓ | ✓ |  |   | Modified MAC                                                  | Canada    | 4 | Y | N | All in-patients | Uncontrolled before-after study (prospective)   | 48<br>(24 before, 24 after) | 70<br>(1.3)   | 61<br>(1.1)  | RR = 0.90<br>(0.70-1.00)   | .25            | 18 |
| Death prior to discharge (per unplanned PICU transfer)                                  | Bonafide 2014 <sup>66</sup>        | ✓ | ✓ |  |   | Bedside PEWS                                                  | US        | 1 | Y | N | All in-patients | Interrupted Time Series study (prospective)     | 59<br>(32 before, 27 after) | 51<br>(6.3)   | 56<br>(6.5)  | RR = 1.03<br>(0.72-1.49) † | .99            | 23 |
| PICU mortality (per PICU admission)                                                     | Duns 2014 <sup>67</sup>            | ✓ |   |  |   | Between the Flags (BTS) tool*                                 | Australia | 1 | Y | Y | All in-patients | Uncontrolled before-after study (prospective)   | 48<br>(24 before, 24 after) | 30<br>(8.57)  | 20<br>(5.49) | RR=0.64<br>(0.37-1.11) †   | .14            | 7  |
| Death in PICU (per 1,000 patient-days)                                                  | Agulnik 2017 <sup>68</sup>         | ✓ |   |  | ✓ | Children's Hospital Cardiac Early Warning Score (C-CHEWS)     | Guatemala | 1 | Y | N | Oncology unit   | Uncontrolled before-after study (retrospective) | 24<br>(12 before, 12 after) | 21<br>(1.25)  | 22<br>(1.10) | RR=0.89<br>(0.49-1.61) †   | .76            | 19 |

|                                                          |                              |   |   |   |   |                                                                  |                                                                    |        |   |   |                               |                                                 |                             |                      |                      |                            |      |    |
|----------------------------------------------------------|------------------------------|---|---|---|---|------------------------------------------------------------------|--------------------------------------------------------------------|--------|---|---|-------------------------------|-------------------------------------------------|-----------------------------|----------------------|----------------------|----------------------------|------|----|
| Death in PICU (per emergency PICU admission)             | Sefton 2015 <sup>69</sup>    | ✓ |   | ✓ | ✓ | Modified Bristol PEWT (a)                                        | UK                                                                 | 1      | Y | N | All PICU admissions           | Controlled before-after study (retrospective)   | 24<br>(12 before, 12 after) | 17<br>(10.8)         | 14<br>(8.4)          | RR = 0.78<br>(0.40-1.53) † | .47  | 16 |
| Deaths in PICU (per unplanned PICU admission)            | Kolovos, 2018                | ✓ | ✓ |   |   | RRT activation criteria*                                         | US                                                                 | 1      | Y | N | All unplanned PICU admissions | Uncontrolled before-after study (retrospective) | 78<br>(42 before, 36 after) | 54+<br>(4.9)         | 40+<br>(3.8)         | RR = 0.77<br>(0.52-1.15) † | .20+ | 12 |
| PICU mortality (per 1,000 discharges)                    | Parshuram 2018 <sup>65</sup> | ✓ | ✓ |   | ✓ | Bedside PEWS                                                     | Belgium, Ireland, Netherlands, England, Italy, Canada, New Zealand | 2<br>1 | Y | N | All in-patients               | Cluster randomised trial (prospective)          | 18<br>(6 pre, 12 post)      | Con:<br>34<br>(0.73) | Con:<br>91<br>(0.96) | OR=0.95<br>(0.48-1.86)     | .88  | 23 |
| <b>CARDIAC ARREST</b>                                    |                              |   |   |   |   |                                                                  |                                                                    |        |   |   |                               |                                                 |                             |                      |                      |                            |      |    |
| Cardiac arrests on ward (per 1,000 admissions)           | Tibballs 2005 <sup>13</sup>  | ✓ | ✓ |   | ✓ | Melbourne Activation Criteria (MAC)                              | Australia                                                          | 1      | Y | N | All in-patients               | Uncontrolled before-after study (prospective)   | 53<br>(41 before, 12 after) | 20<br>(0.19)         | 4<br>(0.11)          | RR = 0.58<br>(0.20-1.70)   | .33  | 10 |
| Cardiopulmonary arrests (per 1,000 non-ICU patient-days) | Brilli 2007 <sup>15</sup>    | ✓ | ✓ |   | ✓ | Paediatric Medical Emergency Team (PMET) triggering criteria (a) | US                                                                 | 1      | Y | N | All in-patients               | Uncontrolled before-after study (prospective)   | 27<br>(15 before, 12 after) | 7<br>(0.08)          | 2<br>(0.04)          | RR=0.50<br>(0.10-2.42) †   | .11  | 14 |
| Ward cardiac arrest rate (per 1,000 ward admissions)     | Hanson 2010 <sup>62</sup>    | ✓ | ✓ |   | ✓ | <i>Not described</i>                                             | US                                                                 | 1      | Y | N | All in-patients               | Uncontrolled before-after study (retrospective) | 36<br>(24 before, 12 after) | 11<br>(1.27)         | 2<br>(0.45)          | RR = 0.35<br>(0.08-1.58) † | .13  | 18 |

|                                                            |                              |   |   |  |   |                                                              |                                                                    |        |   |   |                 |                                               |                             |                                              |                                              |                            |                 |    |
|------------------------------------------------------------|------------------------------|---|---|--|---|--------------------------------------------------------------|--------------------------------------------------------------------|--------|---|---|-----------------|-----------------------------------------------|-----------------------------|----------------------------------------------|----------------------------------------------|----------------------------|-----------------|----|
| Ward cardiopulmonary arrests (per 1,000 patient-days)      | Hunt 2008 <sup>16</sup>      | ✓ | ✓ |  |   | Paediatric Medical Emergency Team (PMET) triggering criteria | US                                                                 | 1      | Y | N | All in-patients | Uncontrolled before-after study (prospective) | 24<br>(12 before, 12 after) | 5<br>(0.10)                                  | 5<br>(0.10)                                  | RR = 0.98<br>(0.22-4.24)   | .97             | 17 |
| Preventable cardiac arrests (per 1,000 admissions)         | Tibballs 2009 <sup>63</sup>  | ✓ | ✓ |  | ✓ | Melbourne Activation Criteria (MAC)                          | Australia                                                          | 1      | Y | N | All in-patients | Uncontrolled before-after study (prospective) | 89<br>(41 before, 48 after) | 17<br>(0.16)                                 | 10<br>(0.07)                                 | RR = 0.45<br>(0.20-0.97)   | <b>.04</b>      | 15 |
| Unexpected cardiac arrests (per 1,000 admissions)          | Tibballs 2009 <sup>63</sup>  | ✓ | ✓ |  | ✓ | Melbourne Activation Criteria (MAC)                          | Australia                                                          | 1      | Y | N | All in-patients | Uncontrolled before-after study (prospective) | 89<br>(41 before, 48 after) | 20<br>(0.19)                                 | 24<br>(0.17)                                 | RR = 0.91<br>(0.50-1.64)   | .75             | 15 |
| Actual cardiopulmonary arrests (per 1,000 ward admissions) | Kotsakis 2011 <sup>64</sup>  | ✓ | ✓ |  |   | Modified MAC                                                 | Canada                                                             | 4      | Y | N | All in-patients | Uncontrolled before-after study (prospective) | 48<br>(24 before, 24 after) | 69<br>(1.9)                                  | 66<br>(1.8)                                  | RR = 0.95<br>(0.76-1.96)   | .68             | 18 |
| Near cardiopulmonary arrests (per 1,000 admissions)        | Kotsakis 2011 <sup>64</sup>  | ✓ | ✓ |  |   | Modified MAC                                                 | Canada                                                             | 4      | Y | N | All in-patients | Uncontrolled before-after study (prospective) | 48<br>(24 before, 24 after) | 123<br>(3.4)                                 | 67<br>(1.9)                                  | RR = 0.54<br>(0.52-0.57)   | <b>&lt;.001</b> | 18 |
| Cardiac arrests on ward (per 1,000 non-ICU patient-days)   | Bonafide 2014 <sup>66</sup>  | ✓ | ✓ |  |   | Bedside PEWS                                                 | US                                                                 | 1      | Y | N | All in-patients | Interrupted Time Series study (prospective)   | 59<br>(32 before, 27 after) | 6+<br>(0.03)                                 | 2+<br>(0.01)                                 | RR = 0.36<br>(0.07-1.78) † | .21             | 23 |
| Cardiac arrests (per 1,000 patient-days)                   | Parshuram 2018 <sup>65</sup> | ✓ | ✓ |  | ✓ | Bedside PEWS                                                 | Belgium, Ireland, Netherlands, England, Italy, Canada, New Zealand | 2<br>1 | Y | N | All in-patients | Cluster randomised trial (prospective)        | 18<br>(6 pre, 12 post)      | Con:<br>18<br>(0.11)<br>Int:<br>15<br>(0.12) | Con:<br>32<br>(0.10)<br>Int:<br>27<br>(0.11) | RR=1.02<br>(0.65-1.62)     | .92             | 23 |

| RESPIRATORY ARREST                                   |                                   |   |   |  |   |                                                                  |          |   |   |   |                 |                                                 |                             |               |              |                          |             |    |
|------------------------------------------------------|-----------------------------------|---|---|--|---|------------------------------------------------------------------|----------|---|---|---|-----------------|-------------------------------------------------|-----------------------------|---------------|--------------|--------------------------|-------------|----|
| Ward respiratory arrests (per 1,000 patient-days)    | Hunt 2008 <sup>16</sup>           | ✓ | ✓ |  |   | Paediatric Medical Emergency Team (PMET) triggering criteria     | US       | 1 | Y | N | All in-patients | Uncontrolled before-after study (prospective)   | 24<br>(12 before, 12 after) | 11<br>(0.23)  | 3<br>(0.06)  | RR = 0.27<br>(0.07-0.95) | <b>.04</b>  | 17 |
| CARDIAC OR RESPIRATORY ARREST                        |                                   |   |   |  |   |                                                                  |          |   |   |   |                 |                                                 |                             |               |              |                          |             |    |
| Cardiac or respiratory arrest (per 1,000 discharges) | Zenker 2007 <sup>61</sup>         | ✓ | ✓ |  |   | RRT activation criteria*                                         | US       | 1 | Y | N | All in-patients | Uncontrolled before-after study (prospective)   | 34<br>(23 before, 11 after) | 180<br>(7.98) | 60<br>(5.13) | RR=0.64<br>(0.48-0.86) † | .19         | 12 |
| Code calls (per 1,000 non-ICU patient-days)          | Brilli 2007 <sup>15</sup>         | ✓ | ✓ |  | ✓ | Paediatric Medical Emergency Team (PMET) triggering criteria (a) | US       | 1 | Y | N | All in-patients | Uncontrolled before-after study (prospective)   | 27<br>(15 before, 12 after) | 25<br>(0.27)  | 6<br>(0.11)  | RR=0.42<br>(0.17-1.03) † | .06†        | 14 |
| Code calls (per 1,000 non-ICU patient-days)          | Sharek 2007 <sup>17</sup>         | ✓ | ✓ |  | ✓ | Paediatric Rapid Response Team (PRRT) triggering criteria        | US       | 1 | Y | N | All in-patients | Uncontrolled before-after study (prospective)   | 84<br>(67 before, 17 after) | 53<br>(0.52)  | 5<br>(0.15)  | RR = 0.29<br>(0.10-0.65) | <b>.008</b> | 15 |
| Code calls (per 1,000 admissions)                    | Anwar-al-Haque 2010 <sup>18</sup> | ✓ | ✓ |  |   | Paediatric Rapid Response Team (PRRT) triggering criteria (b)    | Pakistan | 1 | Y | N | All in-patients | Uncontrolled before-after study (retrospective) | 18<br>(9 before, 9 after)   | 26<br>(5.25)  | 12<br>(2.73) | RR = 0.52<br>(0.26-1.03) | .06         | 6  |
| CALLS FOR URGENT REVIEW / ASSISTANCE                 |                                   |   |   |  |   |                                                                  |          |   |   |   |                 |                                                 |                             |               |              |                          |             |    |



|                                                                |                              |   |   |   |   |                               |           |   |   |   |                 |                                                 |                             |                 |                 |                             |                  |    |
|----------------------------------------------------------------|------------------------------|---|---|---|---|-------------------------------|-----------|---|---|---|-----------------|-------------------------------------------------|-----------------------------|-----------------|-----------------|-----------------------------|------------------|----|
| Urgent calls to respiratory therapist (per 1,000 patient-days) | Parshuram 2011 <sup>71</sup> | ✓ |   | ✓ | ✓ | Bedside PEWS                  | Canada    | 1 | N | N | All in-patients | Uncontrolled before-after study (prospective)   | 8<br>(3 before, 5 after)    | 8<br>(9.5)      | 8<br>(3.4)      | RR = 0.36<br>(0.13-0.95) †  | <b>.04+</b>      | 23 |
| Urgent calls to paediatrician (per 1,000 patient-days)         | Parshuram 2011 <sup>71</sup> | ✓ |   | ✓ | ✓ | Bedside PEWS                  | Canada    | 1 | N | N | All in-patients | Uncontrolled before-after study (prospective)   | 8<br>(3 before, 5 after)    | 19<br>(22.6)    | 12<br>(5.1)     | RR = 0.23<br>(0.11-0.46) †  | <b>&lt;.0001</b> | 23 |
| Code blue calls on the ward (per 1,000 admissions)             | Kotsakis 2011 <sup>64</sup>  | ✓ | ✓ |   |   | Modified MAC                  | Canada    | 4 | Y | N | All in-patients | Uncontrolled before-after study (prospective)   | 48<br>(24 before, 24 after) | 210<br>(3.75)   | 150<br>(2.70)   | RR = 0.71<br>(0.61-0.83)    | <b>&lt;.0001</b> | 18 |
| Urgent calls to outreach team (per 1,000 admissions)           | Duns 2014 <sup>67</sup>      | ✓ |   |   |   | Between the Flags (BTS) tool* | Australia | 1 | Y | Y | All in-patients | Uncontrolled before-after study (prospective)   | 48<br>(24 before, 24 after) | 1,058<br>(39.5) | 2,120<br>(76.0) | RR=1.92<br>(1.79-2.07) †    | <b>.02</b>       | 7  |
| RRT calls (per 1,000 patient-days)                             | Panesar 2014 <sup>72</sup>   |   |   | ✓ |   | Modified Brighton PEWS (e)    | US        | 1 | Y | Y | All in-patients | Uncontrolled before-after study (retrospective) | 42<br>(18 before, 24 after) | 44<br>(3.14)    | 69<br>(4.23)    | RR = 1.35<br>(0.92-1.96) †  | .11              | 15 |
| RRT calls (per 1,000 patient days)                             | Douglas 2016 <sup>73</sup>   | ✓ |   | ✓ | ✓ | Modified Brighton PEWS (b)    | US        | 1 | Y | Y | All in-patients | Uncontrolled before-after study (retrospective) | 24<br>(12 before, 12 after) | 194<br>(6.17)   | 292<br>(9.80)   | RR = 1.59<br>(1.33-.1.90) † | <b>&lt;.001</b>  | 12 |
| Code calls (per 1,000 patient days)                            | Douglas 2016 <sup>73</sup>   | ✓ |   | ✓ | ✓ | Modified Brighton PEWS (b)    | US        | 1 | Y | Y | All in-patients | Uncontrolled before-after study (retrospective) | 24<br>(12 before, 12 after) | 31<br>(0.98)    | 20<br>(0.67)    | RR = 0.68<br>(0.39-1.19) †  | .21              | 12 |
| <b>PICU TRANSFERS</b>                                          |                              |   |   |   |   |                               |           |   |   |   |                 |                                                 |                             |                 |                 |                             |                  |    |

|                                                                                                     |                              |   |   |   |   |                                                           |                                |        |   |   |                 |                                                 |                             |                       |                        |                            |             |    |
|-----------------------------------------------------------------------------------------------------|------------------------------|---|---|---|---|-----------------------------------------------------------|--------------------------------|--------|---|---|-----------------|-------------------------------------------------|-----------------------------|-----------------------|------------------------|----------------------------|-------------|----|
| Transfers from ward to other specialist units (per 1,000 patient-days)                              | Parshuram 2011 <sup>71</sup> | ✓ |   | ✓ | ✓ | Bedside PEWS                                              | Canada                         | 1      | N | N | All in-patients | Uncontrolled before-after study (prospective)   | 8<br>(3 before, 5 after)    | 5<br>(5.9)            | 19<br>(8.1)            | RR = 1.37<br>(0.51-3.63) † | .54†        | 23 |
| Clinical deterioration events on ward prior to transfer to specialist unit (per 1,000 patient-days) | Parshuram 2011 <sup>71</sup> | ✓ |   | ✓ | ✓ | Bedside PEWS                                              | Canada                         | 1      | N | N | All in-patients | Uncontrolled before-after study (prospective)   | 8<br>(3 before, 5 after)    | 2<br>(2.4)            | 1<br>(0.43)            | RR = 0.18<br>(0.02-1.97) † | .16†        | 23 |
| PICU transfers (per 1,000 admissions)                                                               | Duns 2014 <sup>67</sup>      | ✓ |   |   |   | Between the Flags (BTS) tool*                             | Australia                      | 1      | Y | Y | All in-patients | Uncontrolled before-after study (prospective)   | 48<br>(24 before, 24 after) | 350<br>(13.1)         | 364<br>(13.1)          | RR=1.00<br>(0.86-1.16) †   | .98         | 7  |
| Unplanned PICU transfers from ward (per 1,000 non-ICU patient-days)                                 | Bonafide 2014 <sup>66</sup>  | ✓ | ✓ |   |   | Bedside PEWS                                              | US                             | 1      | Y | N | All in-patients | Interrupted Time Series study (prospective)     | 59<br>(32 before, 27 after) | 874<br>(4.54)         | 936<br>(5.25)          | IRR = 0.73<br>(0.46–1.14)  | .16         | 23 |
| Unplanned transfers to PICU from ward (per 1,000 patient-days)                                      | Agulnik 2017 <sup>68</sup>   | ✓ |   |   | ✓ | Children’s Hospital Cardiac Early Warning Score (C-CHEWS) | Guatemala                      | 1      | Y | N | Oncology unit   | Uncontrolled before-after study (retrospective) | 24<br>(12 before, 12 after) | 157<br>(9.3)          | 130<br>(6.5)           | RR = 0.70<br>(0.56-0.88) † | <b>.003</b> | 19 |
| Urgent PICU admissions (per 1,000 patient-                                                          | Parshuram 2018 <sup>65</sup> | ✓ | ✓ |   | ✓ | Bedside PEWS                                              | Belgium, Ireland, Netherlands, | 2<br>1 | Y | N | All in-patients | Cluster randomised trial (prospective)          | 18<br>(6 pre, 12 post)      | Con:<br>652<br>(4.01) | Con:<br>1178<br>(3.83) | RR=0.95<br>(0.82-1.09)     | .45         | 23 |

|                                                                                                 |                             |   |   |  |  |  |                                                 |    |   |   |   |                 |                                             |                             |                            |                            |                            |                  |    |
|-------------------------------------------------------------------------------------------------|-----------------------------|---|---|--|--|--|-------------------------------------------------|----|---|---|---|-----------------|---------------------------------------------|-----------------------------|----------------------------|----------------------------|----------------------------|------------------|----|
| days)                                                                                           |                             |   |   |  |  |  | England,<br>Italy,<br>Canada,<br>New<br>Zealand |    |   |   |   |                 |                                             | Int:<br>469<br>(3.62)       | Int:<br>828<br>(3.29)      |                            |                            |                  |    |
| <b>PICU OUTCOMES</b>                                                                            |                             |   |   |  |  |  |                                                 |    |   |   |   |                 |                                             |                             |                            |                            |                            |                  |    |
| Critical deterioration events after PICU transfer (per 1,000 non-ICU patient-days)              | Bonafide 2014 <sup>66</sup> | ✓ | ✓ |  |  |  | Bedside PEWS                                    | US | 1 | Y | N | All in-patients | Interrupted Time Series study (prospective) | 59<br>(32 before, 27 after) | 260 <sup>†</sup><br>(1.35) | 282 <sup>†</sup><br>(1.58) | IRR = 0.38<br>(0.20-0.75)  | <b>.01</b>       | 23 |
| Mechanical ventilation within 1hr of unplanned PICU transfer (per unplanned transfer to PICU)   | Bonafide 2014 <sup>66</sup> | ✓ | ✓ |  |  |  | Bedside PEWS                                    | US | 1 | Y | N | All in-patients | Interrupted Time Series study (prospective) | 59<br>(32 before, 27 after) | 45<br>(5.1)                | 42<br>(4.5)                | RR = 0.87<br>(0.58-1.31) † | .51              | 23 |
| Mechanical ventilation within 12hrs of unplanned PICU transfer (per unplanned transfer to PICU) | Bonafide 2014 <sup>66</sup> | ✓ | ✓ |  |  |  | Bedside PEWS                                    | US | 1 | Y | N | All in-patients | Interrupted Time Series study (prospective) | 59<br>(32 before, 27 after) | 112<br>(12.8)              | 103<br>(11.0)              | IRR = 0.17<br>(0.07-0.44)  | <b>&lt;0.001</b> | 23 |
| Vasopressor within 1hr of unplanned PICU transfer (per unplanned transfer to PICU)              | Bonafide 2014 <sup>66</sup> | ✓ | ✓ |  |  |  | Bedside PEWS                                    | US | 1 | Y | N | All in-patients | Interrupted Time Series study (prospective) | 59<br>(32 before, 27 after) | 41<br>(4.7)                | 16<br>(1.7)                | RR = 0.36<br>(0.21-0.64) † | <b>&lt;0.001</b> | 23 |

|                                                                                       |                             |   |   |   |   |                                                           |           |   |   |   |                               |                                                 |                             |                |                |                            |             |    |
|---------------------------------------------------------------------------------------|-----------------------------|---|---|---|---|-----------------------------------------------------------|-----------|---|---|---|-------------------------------|-------------------------------------------------|-----------------------------|----------------|----------------|----------------------------|-------------|----|
| Vasopressors within 12hrs of unplanned PICU transfer (per unplanned transfer to PICU) | Bonafide 2014 <sup>66</sup> | ✓ | ✓ |   |   | Bedside PEWS                                              | US        | 1 | Y | N | All in-patients               | Interrupted Time Series study (prospective)     | 59<br>(32 before, 27 after) | 71<br>(8.1)    | 57<br>(6.1)    | IRR = 0.20<br>(0.06-0.62)  | <b>.006</b> | 23 |
| Invasive ventilation in PICU (per emergency PICU admission)                           | Sefton 2015 <sup>69</sup>   | ✓ |   | ✓ | ✓ | Modified Bristol PEWT (a)                                 | UK        | 1 | Y | N | All PICU admissions           | Controlled before-after study (retrospective)   | 24<br>(12 before, 12 after) | 118<br>(75.2)  | 104<br>(62.7)  | RR = 0.83<br>(0.72-0.97) † | <b>.002</b> | 16 |
| Inotropes in PICU (per emergency PICU admission)                                      | Sefton 2015 <sup>69</sup>   | ✓ |   | ✓ | ✓ | Modified Bristol PEWT (a)                                 | UK        | 1 | Y | N | All PICU admissions           | Controlled before-after study (retrospective)   | 24<br>(12 before, 12 after) | 50<br>(31.8)   | 40<br>(24.1)   | RR = 0.76<br>(0.53-1.08) † | .12         | 16 |
| Intubation within 24hrs of PICU admission (per 1,000 patient-days)                    | Agulnik 2017 <sup>68</sup>  | ✓ |   |   | ✓ | Children's Hospital Cardiac Early Warning Score (C-CHEWS) | Guatemala | 1 | Y | N | Oncology unit                 | Uncontrolled before-after study (retrospective) | 24<br>(12 before, 12 after) | 11<br>(0.65)   | 18<br>(0.90)   | RR=1.38<br>(0.65-2.92) †   | .46         | 19 |
| Vasopressors within 24hrs of PICU admission (per 1,000 patient-days)                  | Agulnik 2017 <sup>68</sup>  | ✓ |   |   | ✓ | Children's Hospital Cardiac Early Warning Score (C-CHEWS) | Guatemala | 1 | Y | N | Oncology unit                 | Uncontrolled before-after study (retrospective) | 24<br>(12 before, 12 after) | 29<br>(1.72)   | 37<br>(1.86)   | RR=1.08<br>(0.66-1.75) †   | .60         | 19 |
| Mechanical ventilation during PICU admission (per PICU admission)                     | Kolovos 2018 <sup>70</sup>  | ✓ | ✓ |   |   | RRT activation criteria*                                  | US        | 1 | Y | N | All unplanned PICU admissions | Uncontrolled before-after study (retrospective) | 78<br>(42 before, 36 after) | 285<br>(25.98) | 233<br>(22.09) | RR = 0.85<br>(0.73-0.99) † | <b>.03+</b> | 12 |

1  
2  
3  
4  
5  
6  
7  
8  
9  
10  
11  
12  
13  
14  
15  
16  
17  
18  
19  
20  
21  
22  
23  
24  
25  
26  
27  
28  
29  
30  
31  
32  
33  
34  
35  
36  
37  
38  
39  
40  
41  
42  
43  
44  
45  
46

|                                                                                                                                                                                                                                                                                                                                                                                                                                                                                                                                                                                                                                                                                           |                              |   |   |  |   |                          |                                                                    |        |   |   |                               |                                                 |                             |                       |                       |                          |              |    |
|-------------------------------------------------------------------------------------------------------------------------------------------------------------------------------------------------------------------------------------------------------------------------------------------------------------------------------------------------------------------------------------------------------------------------------------------------------------------------------------------------------------------------------------------------------------------------------------------------------------------------------------------------------------------------------------------|------------------------------|---|---|--|---|--------------------------|--------------------------------------------------------------------|--------|---|---|-------------------------------|-------------------------------------------------|-----------------------------|-----------------------|-----------------------|--------------------------|--------------|----|
| Intubation within 1hr of PICU admission (per PICU admission)                                                                                                                                                                                                                                                                                                                                                                                                                                                                                                                                                                                                                              | Kolovos 2018 <sup>70</sup>   | ✓ | ✓ |  |   | RRT activation criteria* | US                                                                 | 1      | Y | N | All unplanned PICU admissions | Uncontrolled before-after study (retrospective) | 78<br>(42 before, 36 after) | 49<br>(4.47)          | 88<br>(8.34)          | RR = 1.87<br>(1.33-2.62) | <b>.0003</b> | 12 |
| Significant clinical deterioration events (per 1,000 patient-days)                                                                                                                                                                                                                                                                                                                                                                                                                                                                                                                                                                                                                        | Parshuram 2018 <sup>65</sup> | ✓ | ✓ |  | ✓ | Bedside PEWS             | Belgium, Ireland, Netherlands, England, Italy, Canada, New Zealand | 2<br>1 | Y | N | All in-patients               | Cluster randomised trial (prospective)          | 18<br>(6 pre, 12 post)      | Con:<br>144<br>(0.89) | Con:<br>259<br>(0.84) | RR=0.77<br>(0.61-0.97)   | <b>.03</b>   | 23 |
| <p>A critical deterioration event is defined as transfer to the intensive care unit (ICU) followed by non-invasive or invasive mechanical ventilation or vasopressor infusion within 12 hours<sup>66</sup></p> <p>*Indicates a PTTT not described or validated in the published literature</p> <p>† Data calculated by research team, based on data presented in the journal article. All data calculated via <a href="https://www.medcalc.org">https://www.medcalc.org</a>.</p> <p>PTTT, paediatric track and trigger tool; RRT, rapid response team; MET, medical emergency team; PICU, paediatric intensive care unit; RR, relative risk; OR, odds ratio; ED, emergency department</p> |                              |   |   |  |   |                          |                                                                    |        |   |   |                               |                                                 |                             |                       |                       |                          |              |    |

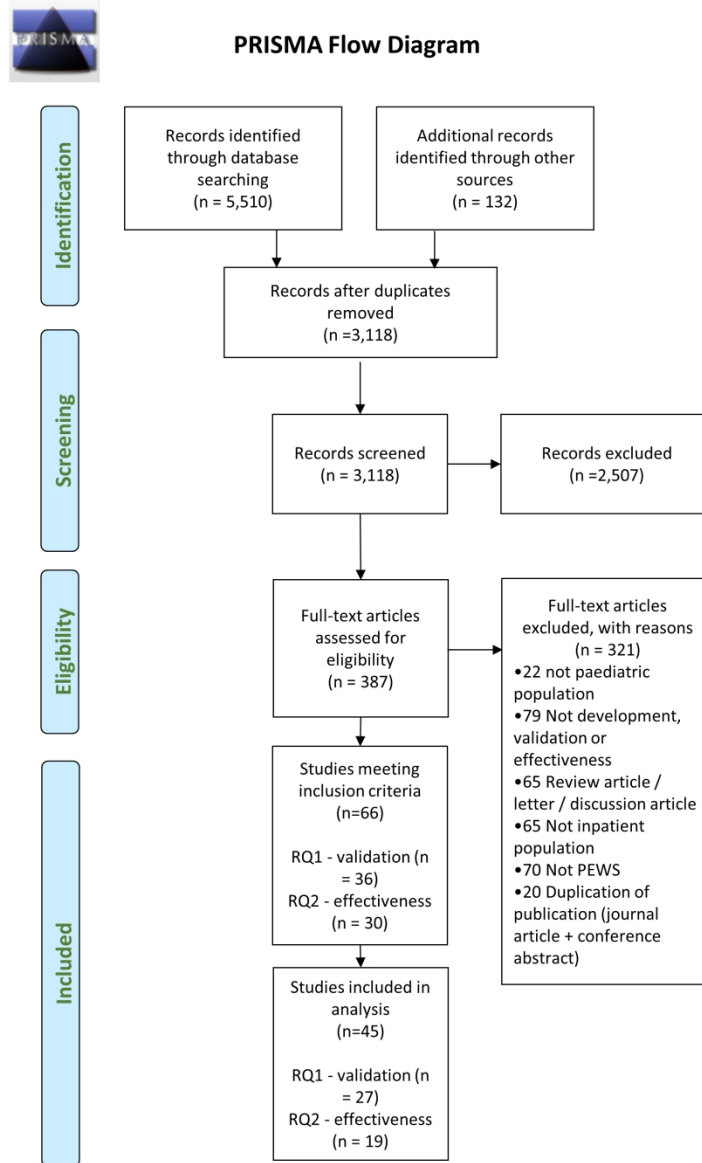

Figure 1: PRISMA flow diagram of study inclusion

190x254mm (300 x 300 DPI)

**Supplementary Table 1 – Details of search strategy****Database Search**

The search was across a range of databases from their inception to January 2015 then an update was carried out in September 2016 and the second update May 2018.

A preliminary search strategy was developed using a set of key papers known to the group for Ovid Medline using both text words and Medical subject headings. The search strategy was modified according to the indexing systems of the other databases.

| Databases and Database platform                                                 | Original search results<br>January 2015                                         | Update September 2016                                                          | Update May 2018                                                                 |
|---------------------------------------------------------------------------------|---------------------------------------------------------------------------------|--------------------------------------------------------------------------------|---------------------------------------------------------------------------------|
| British Nursing Index (Proquest)                                                | 19                                                                              | 12                                                                             | 25                                                                              |
| CINAHL (Cumulative Index of<br>Nursing and Allied Health Literature)<br>(Ebsco) | 206                                                                             | 17                                                                             | 29                                                                              |
| Cochrane Central Register of<br>Controlled Trials (Wiley)                       | 43                                                                              | 4                                                                              | 30                                                                              |
| EMBASE (OVID)                                                                   | 1065                                                                            | 206                                                                            | 431                                                                             |
| HMIC (Health Management<br>Information Centre) (OVID)                           | 70                                                                              | 1                                                                              | 75                                                                              |
| Medline (OVID)                                                                  | 943                                                                             | 135                                                                            | 328                                                                             |
| Medline in Process (OVID)                                                       | 43                                                                              | 69                                                                             | 45                                                                              |
| Scopus (Elsevier)                                                               | 747                                                                             | 85                                                                             | 234                                                                             |
| Web of Knowledge (Science Science<br>Citation Indexes) (Thomson Reuter)         | 400                                                                             | 82                                                                             | 166                                                                             |
| <b>Total</b>                                                                    | <b>3536</b><br><i>(prior to removing duplicates<br/>and irrelevant studies)</i> | <b>611</b><br><i>(prior to removing duplicates<br/>and irrelevant studies)</i> | <b>1363</b><br><i>(prior to removing duplicates<br/>and irrelevant studies)</i> |

**Supplementary search**

## PUMA Search Information

### Supplementary search

NB. Restricted each of the below searches by dates: 01/01/2016 – 16/05/2018

| Trials Registers                                                                                                                                                                                    | Hits January 2015 | Update September 2016 | Update June 2018 |
|-----------------------------------------------------------------------------------------------------------------------------------------------------------------------------------------------------|-------------------|-----------------------|------------------|
| ClinicalTrials.gov<br><a href="https://clinicaltrials.gov/">https://clinicaltrials.gov/</a>                                                                                                         | 6                 | 4                     | 0                |
| UK Clinical Trials Gateway<br><a href="http://www.ukctg.nihr.ac.uk/default.aspx">http://www.ukctg.nihr.ac.uk/default.aspx</a>                                                                       | 3 (duplicates)    | 5 (1 duplicate)       | 0                |
| The WHO trial search portal for studies worldwide:<br><a href="http://apps.who.int/trialsearch">http://apps.who.int/trialsearch</a>                                                                 | 1 (duplicate)     | 0                     | 0                |
| Journal site                                                                                                                                                                                        | Hits              |                       |                  |
| Archives of Disease in Childhood<br><a href="http://adc.bmj.com/">http://adc.bmj.com/</a>                                                                                                           | 14                | 4                     | 7                |
| BMJ<br><a href="http://www.bmj.com/theBMJ">http://www.bmj.com/theBMJ</a>                                                                                                                            | 1                 | 0                     | 1                |
| BMJ Quality and safety<br><a href="http://qualitysafety.bmj.com/">http://qualitysafety.bmj.com/</a>                                                                                                 | 7                 | 4                     | 2                |
| JAMA Pediatrics<br><a href="http://archpedi.jamanetwork.com/journal.aspx">http://archpedi.jamanetwork.com/journal.aspx</a>                                                                          | 1                 | 0                     | 0                |
| Journal of Critical Care<br><a href="http://www.jccjournal.org/">http://www.jccjournal.org/</a>                                                                                                     | 3                 | 1                     | 0                |
| Journal of Pediatrics ( American)<br><a href="http://www.jpeds.com/">http://www.jpeds.com/</a>                                                                                                      | 1                 | 0                     | 2                |
| Journal of Paediatrics and Child Health (Australian)<br><a href="http://onlinelibrary.wiley.com/journal/10.1111/(ISSN)1440-1754">http://onlinelibrary.wiley.com/journal/10.1111/(ISSN)1440-1754</a> | 2                 | 2                     | 0                |



|                                                                                                                                                                         |                  |                     |                     |
|-------------------------------------------------------------------------------------------------------------------------------------------------------------------------|------------------|---------------------|---------------------|
| Lancet<br><a href="http://www.thelancet.com/">http://www.thelancet.com/</a>                                                                                             | 0                | 0                   | 0                   |
| New England Journal of Medicine<br><a href="http://www.nejm.org/">http://www.nejm.org/</a>                                                                              | 0                | 0                   | 0                   |
| Pediatrics<br><a href="http://pediatrics.aappublications.org/">http://pediatrics.aappublications.org/</a>                                                               | 6                | 2                   | 0                   |
| Pediatric Critical Care Medicine<br><a href="http://journals.lww.com/pccmjournal/pages/default.aspx">http://journals.lww.com/pccmjournal/pages/default.aspx</a>         | 14               | 6                   | 3                   |
| <b>Websites and organisations</b>                                                                                                                                       | <b>HITS</b>      |                     |                     |
| American Society of Anesthesiologists<br><a href="https://www.asahq.org/">https://www.asahq.org/</a>                                                                    | 1                | 0                   | 0                   |
| American Academy of Pediatrics<br><a href="http://www.aap.org/en-us/Pages/Default.aspx">http://www.aap.org/en-us/Pages/Default.aspx</a>                                 | 1                |                     | 0                   |
| Association of Anaesthetists of Great Britain and Ireland<br><a href="http://www.aagbi.org/">http://www.aagbi.org/</a>                                                  | 0                | 0                   | 0                   |
| Australian Medical Council<br><a href="http://www.amc.org.au/">http://www.amc.org.au/</a>                                                                               | 1                | 0                   | 0                   |
| Royal College of Paediatrics and Child Health<br><a href="http://www.rcpch.ac.uk/">http://www.rcpch.ac.uk/</a>                                                          | 1                | 0                   | 4                   |
| Paediatric Nursing Association Europe<br><a href="http://www.rcn.org.uk/">http://www.rcn.org.uk/</a>                                                                    | 9                |                     | 0                   |
| European Federation of Critical Care Nursing Associations<br><a href="http://www.efccna.org/">http://www.efccna.org/</a>                                                | No Search Option | No Search Option    | No Search Option    |
| Royal Australasian College of Physicians ( Division of Child Health)<br><a href="https://www.racp.edu.au/page/paed-policy">https://www.racp.edu.au/page/paed-policy</a> | 0                | 0                   | 0                   |
| Royal College of Physicians (inclusive of National Clinical Guideline Centre)<br><a href="https://www.rcplondon.ac.uk/">https://www.rcplondon.ac.uk/</a>                | 2                | 0                   | 0                   |
| The NHS Institute for Innovation and Improvement<br><a href="http://www.institute.nhs.uk/">http://www.institute.nhs.uk/</a>                                             | 4                | Site cease to exist | Site cease to exist |
| NICE: Eyes on Evidence                                                                                                                                                  | 4                | 1                   | 1                   |

|                                                                                                                                                                                                   |    |    |    |
|---------------------------------------------------------------------------------------------------------------------------------------------------------------------------------------------------|----|----|----|
| <a href="https://www.evidence.nhs.uk/about-evidence-services/bulletins-and-alerts/eyes-on-evidence">https://www.evidence.nhs.uk/about-evidence-services/bulletins-and-alerts/eyes-on-evidence</a> |    |    |    |
| <b>TOTAL</b>                                                                                                                                                                                      | 82 | 30 | 20 |

**Total = 112**

## Search Strategies

### BNI

"Paediatric Early Warning" OR ("pediatric early warning" OR "pediatric rapid response") OR ("paediatric rapid response" OR "Bedside paediatric early warning") OR ("Pediatric Advanced Warning Score" OR "Paediatric Advanced Warning Score")

### CENTRAL

Search Name: PUMA update

Last Saved: 16/05/2018 11:39:08.703

Description:

| ID  | Search                         |
|-----|--------------------------------|
| #1  | "early warning score*"         |
| #2  | "early warning system*"        |
| #3  | "early warning tool*"          |
| #4  | "VitalPAC Early Warning Score" |
| #5  | "activation criteria"          |
| #6  | "Rapid Response Team"          |
| #7  | "Rapid Response system*"       |
| #8  | "Track and trigger"            |
| #9  | "trigger tools"                |
| #10 | "calling criteria"             |

1  
2  
3  
4  
5  
6  
7  
8  
9  
10  
11  
12  
13  
14  
15  
16  
17  
18  
19  
20  
21  
22  
23  
24  
25  
26  
27  
28  
29  
30  
31  
32  
33  
34  
35  
36  
37  
38  
39  
40  
41  
42  
43  
44  
45  
46

- #11 "Alert criteria"
- #12 "Rapid Response"
- #13 #1 or #2 or #3 or #4 or #5 or #6 or #7 or #8 or #9 or #10 or #11 or #12
- #14 pediatric\* or paediatric\* or infant\* or child\* or baby or toddler or babies or teen\* or adolescent\*
- #15 #13 and #14
- #16 "Pediatric Early Warning"
- #17 "Paediatric Early Warning"
- #18 "p?ediatric alert"
- #19 "Pediatric Rapid Response"
- #20 "Pediatric Advanced Warning Score\*"
- #21 "Paediatric Advanced Warning Score\*"
- #22 "infant early warning"
- #23 "Bedside PEWS"
- #24 "Bedside paediatric early warning"
- #25 #16 or #17 or #18 or #19 or #20 or #21 or #22 or #23 or #24
- #26 #15 or #25 Publication Year from 2016 to 2018

**CINAHL via EBSCO**

| Search ID#                   | Search Terms                                                                                                                                                                                                      |
|------------------------------|-------------------------------------------------------------------------------------------------------------------------------------------------------------------------------------------------------------------|
| <input type="checkbox"/> S11 | S7 OR S10                                                                                                                                                                                                         |
| <input type="checkbox"/> S10 | S1 AND S8                                                                                                                                                                                                         |
| <input type="checkbox"/> S9  | S2 AND S8                                                                                                                                                                                                         |
| <input type="checkbox"/> S8  | S3 AND S4                                                                                                                                                                                                         |
| <input type="checkbox"/> S7  | S5 OR S6                                                                                                                                                                                                          |
| <input type="checkbox"/> S6  | TX "infant early warning" OR TX "bedside PEWS" OR TX "Bedside paediatric early warning"                                                                                                                           |
| <input type="checkbox"/> S5  | TX "p?ediatric early warning system" OR TX "P?ediatric Early Warning" OR TX "p?ediatric early warning score" OR TX "p?ediatric risk of mortality" OR TX "P?ediatric Rapid Response Team" OR TX "P?ediatric alert" |
| <input type="checkbox"/> S4  | AB pediatric* or paediatric* or infant*1 or child* or baby or toddler or babies or teen* or adolescent*                                                                                                           |

- 1  
2  
3  
4  
5  
6  
7  
8  
9  
10  
11
- S3 TX "track-and-trigger" OR TX "VitalPAC Early Warning Score" OR TX "activation criteria". OR TX "trigger tool\*" OR TX "Rapid Response" OR TX "activation criteria". OR TX "early warning" OR TX "Alert criteria" OR TX outreach N3 emergency
  - S2 Detecting W3 deterioration
  - S1 "early warning"

## DARE

(Paediatric early warning) OR (pediatric early warning) OR (Paediatric Rapid Response) IN DARE  
( early warning) OR (track-and-trigger system) OR ( Rapid Response) IN DARE  
(emergency team) AND (early warning) IN DARE

## Embase

Database: EMBASE <1947-Present>

Search Strategy:

- 
- 1 ("early warning" adj5 scor\*).ab,ti. (568)
  - 2 ("early warning" adj5 system\* adj5 (deteriorat\* or mortality or death or outcome\* or harm\* or safety)).ab,ti. (51)
  - 3 "acute illness severity".mp. (38)
  - 4 early intervention/ and ((prevent\* or reduc\* or improv\*) adj5 (deteriorat\* or mortality or death or outcome\* or harm\* or safety)).ab,ti. (1185)
  - 5 ("early medical intervention" adj5 (tool\* or scor\* or index\* or indicator\* or indice\* or assessment\* or guide\* or instrument\* or criteria or parameter\* or deteriorat\* or mortality or death or monitor\* or outcome\* or harm\* or safety)).ab,ti. (10)
  - 6 \*"severity of illness index"/ and ((tool\* or scor\* or index\* or indicator\* or indice\* or assessment\* or instrument\* or criteria or parameter\*) adj5 ((prevent\* or reduc\* or improv\*) adj5 (deteriorat\* or mortality or death or outcome\* or harm\* or safety))).ab,ti. (3)
  - 7 exp Health Status Indicators/ and ((tool\* or scor\* or index\* or indicator\* or indice\* or assessment\* or instrument\* or criteria or parameter\*) adj3 ((prevent\* or reduc\* or improv\*) adj3 (deteriorat\* or mortality or death or outcome\* or harm\* or safety))).ab,ti. (7)
  - 8 rapid response team/ (849)
  - 9 "alarm monitor"/ and (prevent\* or reduc\* or improv\*).mp. (245)
  - 10 ("clinical alarm" adj5 (prevent\* or reduc\* or improv\*)).mp. (2)
  - 11 (outreach adj3 emergency).tw. (46)
  - 12 VitalPAC Early Warning Score.tw. (15)
  - 13 medical emergency team.tw. (395)
  - 14 Rapid Response Systems.mp. (140)
- 41  
42  
43  
44  
45  
46

1  
2  
3  
4  
5  
6  
7  
8  
9  
10  
11  
12  
13  
14  
15  
16  
17  
18  
19  
20  
21  
22  
23  
24  
25  
26  
27  
28  
29  
30  
31  
32  
33  
34  
35  
36  
37  
38  
39  
40  
41  
42  
43  
44  
45  
46

- 15 ("rapid response" adj5 (prevent\* or reduc\* or improv\*)).tw. (191)  
16 ("medical device" adj3 (prevent\* or reduc\* or improv\*)).mp. (187)  
17 (((Detecting or managing) adj3 deterioration) and warning).tw. (11)  
18 track-and-trigger system.tw. (24)  
19 (Track adj trigger).tw. (4)  
20 (Track and trigger).tw. (241)  
21 trigger tools.tw. (47)  
22 ("alert criteria" or "activation criteria" or "calling criteria").tw. (209)  
23 SBAR technique\*.mp. (5)  
24 (score adj3 severity of illness).tw. (393)  
25 or/1-24 (4295)  
26 limit 25 to (infant <to one year> or child <unspecified age> or preschool child <1 to 6 years> or school child <7 to 12 years> or adolescent <13 to 17 years>) (533)  
27 P?ediatric Early Warning.mp. (120)  
28 p?ediatric alert.tw. (7)  
29 p?ediatric early warning systems.mp. (4)  
30 p?ediatric risk of mortality.tw. (527)  
31 P?ediatric Rapid Response Team.tw. (14)  
32 Point-of-Care Systems/ and ((paediatric or pediatric) adj3 (improve or identify or detect\* or outcome or early or critical or emergency)).tw. (23)  
33 P?ediatric Advanced Warning Score.tw. (3)  
34 neonatal early warning.tw. (1)  
35 infant early warning.tw. (0)  
36 p?ediatric rapid response.tw. (31)  
37 Bedside paediatric early warning.tw. (5)  
38 Bedside PEWS.tw. (7)  
39 or/27-38 (707)  
40 26 or 39 (1155)  
41 limit 40 to human (1065)

**HMIC**

Database: HMIC Health Management Information Consortium

Search Strategy:  
-----

- 1 ("early warning" adj5 scor\*).ab,ti. (23)
- 2 ("early warning" adj5 system\* adj5 (deteriorat\* or mortality or death or outcome\* or harm\* or safety)).ab,ti. (6)
- 3 "acute illness severity".mp. (3)
- 4 "early medical intervention"/ and ((prevent\* or reduc\* or improv\*) adj5 (deteriorat\* or mortality or death or outcome\* or harm\* or safety)).ab,ti. (0)
- 5 ("early medical intervention" adj5 (tool\* or scor\* or index\* or indicator\* or indice\* or assessment\* or guide\* or instrument\* or criteria or parameter\* or deteriorat\* or mortality or death or monitor\* or outcome\* or harm\* or safety)).ab,ti. (0)
- 6 Health Status Indicators.mp. and ((tool\* or scor\* or index\* or indicator\* or indice\* or assessment\* or instrument\* or criteria or parameter\*) adj3 ((prevent\* or reduc\* or improv\*) adj3 (deteriorat\* or mortality or death or outcome\* or harm\* or safety))).ab,ti. (0)
- 7 exp "Severity of illness index"/ and ((tool\* or scor\* or index\* or indicator\* or indice\* or assessment\* or instrument\* or criteria or parameter\*) adj5 ((prevent\* or reduc\* or improv\*) adj5 (deteriorat\* or mortality or death or outcome\* or harm\* or safety))).ab,ti. (0)
- 8 "activation criteria".ab,ti. (2)
- 9 exp Rapid response teams/ (39)
- 10 Clinical Alarms.mp. (0)
- 11 (outreach adj3 emergency).tw. (2)
- 12 VitalPAC Early Warning Score.tw. (0)
- 13 medical emergency team.tw. (15)
- 14 Rapid Response Systems.mp. (8)
- 15 Rapid Response Team.tw. (27)
- 16 ((Detecting or managing) adj3 deterioration).tw. (1)
- 17 track-and-trigger system.tw. (2)
- 18 (Track adj trigger).tw. (1)
- 19 (Track and trigger).tw. (8)
- 20 trigger tools.tw. (4)
- 21 Calling criteria.tw. (1)
- 22 Alert criteria.mp. (1)
- 23 Rapid response.tw. (111)
- 24 (score adj3 severity of illness).tw. (3)
- 25 or/1-24 (171)
- 26 (pediatric\* or paediatric\* or infant\*1 or child\* or baby or toddler or babies or teen\* or adolescent\*).mp. (40161)
- 27 25 and 26 (14)
- 28 p?ediatric alert.tw. (0)
- 29 p?ediatric early warning systems.mp. (1)
- 30 p?ediatric risk of mortality.tw. (4)

- 1  
2  
3 31 Pediatric Rapid Response Team.tw. (0)  
4 32 Point-of-Care.mp. and ((paediatric or pediatric) adj3 (improve or identify or detect\* or outcome or early or critical or emergency)).tw. (0)  
5 33 Pediatric Advanced Warning Score.tw. (0)  
6 34 neonatal early warning.tw. (0)  
7 35 infant early warning.tw. (0)  
8 36 paediatric rapid response.tw. (1)  
9 37 pediatric rapid response.tw. (0)  
10 38 Bedside paediatric early warning.tw. (0)  
11 39 Bedside PEWS.tw. (0)  
12 40 p?ediatric early warning.mp. (2)  
13 41 care.mp. and ((paediatric or pediatric) adj3 (improve or identify or detect\* or outcome or early or critical or emergency)).tw. [mp=title, other title,  
14 abstract, heading words] (57)  
15 42 or/28-41 (59)  
16 43 27 or 42 (70)  
17  
18  
19  
20  
21

## Medline

Database: Ovid MEDLINE(R) <1946 to January Week 2 2015>

Search Strategy:

- 25  
26 1 ("early warning" adj5 scor\*).ab,ti. (260)  
27 2 ("early warning" adj5 system\* adj5 (deteriorat\* or mortality or death or outcome\* or harm\* or safety)).ab,ti. (24)  
28 3 "acute illness severity".mp. (21)  
29 4 "early medical intervention"/ and ((prevent\* or reduc\* or improv\*) adj5 (deteriorat\* or mortality or death or outcome\* or harm\* or safety)).ab,ti. (99)  
30 5 ("early medical intervention" adj5 (tool\* or scor\* or index\* or indicator\* or indice\* or assessment\* or guide\* or instrument\* or criteria or parameter\*  
31 or deteriorat\* or mortality or death or monitor\* or outcome\* or harm\* or safety)).ab,ti. (7)  
32 6 exp Health Status Indicators/ and ((tool\* or scor\* or index\* or indicator\* or indice\* or assessment\* or instrument\* or criteria or parameter\*) adj3  
33 ((prevent\* or reduc\* or improv\*) adj3 (deteriorat\* or mortality or death or outcome\* or harm\* or safety))).ab,ti. (166)  
34 7 "Severity of Illness Index"/ and ((tool\* or scor\* or index\* or indicator\* or indice\* or assessment\* or instrument\* or criteria or parameter\*) adj5  
35 ((prevent\* or reduc\* or improv\*) adj5 (deteriorat\* or mortality or death or outcome\* or harm\* or safety))).ab,ti. (274)  
36 8 exp Hospitals/ and ((Detecting or managing) adj3 deterioration).tw. (2)  
37 9 ("medical device" adj3 (prevent\* or reduc\* or improv\*)).mp. (58)  
38 10 ("alert criteria" or "activation criteria" or "calling criteria").tw. (121)  
39  
40  
41  
42  
43  
44  
45  
46

- 1  
2  
3 11 Hospital Rapid Response Team/ (334)  
4 12 Clinical Alarms/ (332)  
5 13 (outreach adj3 emergency).tw. (32)  
6 14 VitalPAC Early Warning Score.tw. (10)  
7 15 medical emergency team.tw. (247)  
8 16 Rapid Response Systems.mp. (87)  
9 17 Rapid Response Team.tw. (185)  
10 18 (((Detecting or managing) adj3 deterioration) and warning).tw. (8)  
11 19 track-and-trigger system.tw. (14)  
12 20 (Track adj trigger).tw. (2)  
13 21 (Track and trigger).tw. (137)  
14 22 trigger tools.tw. (22)  
15 23 SBAR technique\*.mp. (3)  
16 24 ("rapid response" adj5 (prevent\* or reduc\* or improv\*)).tw. (117)  
17 25 (score adj3 severity of illness).tw. (243)  
18 26 or/1-25 (2286)  
19 27 limit 26 to (humans and "all child (0 to 18 years)") (453)  
20 28 P?ediatric Early Warning.mp. (38)  
21 29 p?ediatric alert.tw. (5)  
22 30 p?ediatric early warning systems.mp. (3)  
23 31 p?ediatric risk of mortality.tw. (400)  
24 32 P?ediatric Rapid Response Team.tw. (6)  
25 33 Point-of-Care Systems/ and ((paediatric or pediatric) adj3 (improve or identify or detect\* or outcome or early or critical or emergency)).tw. (79)  
26 34 P?ediatric Advanced Warning Score.tw. (2)  
27 35 neonatal early warning.tw. (0)  
28 36 infant early warning.tw. (0)  
29 37 p?ediatric rapid response.tw. (20)  
30 38 Bedside paediatric early warning.tw. (2)  
31 39 Bedside PEWS.tw. (2)  
32 40 or/28-39 (542)  
33 41 27 or 40 (943)  
34  
35  
36  
37  
38

### Scopus



( TITLE-ABS-KEY ( "Paediatric Early Warning" OR "Pediatric Early Warning" OR "Pediatric Advanced Warning Score" OR "Paediatric Advanced Warning Score" OR "neonatal early warning" OR "infant early warning" OR "pediatric rapid response" OR "Paediatric rapid response" ) ) OR ( ( ( TITLE-ABS-KEY ( "early warning" W/5 scor\* ) ) OR ( TITLE-ABS-KEY ( "Rapid Response" ) ) OR ( TITLE-ABS-KEY ( "track-and-trigger system" ) ) OR ( TITLE-ABS-KEY ( "track and trigger" ) ) OR ( TITLE-ABS-KEY ( "trigger tool\*" ) ) OR ( TITLE-ABS-KEY ( "alert criteria" ) ) OR ( TITLE-ABS-KEY ( "activation criteria" ) ) OR ( TITLE-ABS-KEY ( "VitalPAC Early Warning Score" ) ) ) ) AND ( TITLE-ABS-KEY ( pediatric\* OR paediatric\* OR infant\* OR child\* OR baby OR toddler OR babies OR teen\* OR adolescent\* ) ) ) AND ( LIMIT-TO ( SUBJAREA , "MEDI" ) OR LIMIT-TO ( SUBJAREA , "NURS" ) OR LIMIT-TO ( SUBJAREA , "NEUR" ) )

**Web of Science**

- # [400](#) #17 OR #1
- 19 **Refined by:** [excluding] **WEB OF SCIENCE CATEGORIES:** ( PARASITOLOGY OR PUBLIC ENVIRONMENTAL OCCUPATIONAL HEALTH OR BIOCHEMISTRY MOLECULAR BIOLOGY OR OPTICS OR HEALTH CARE SCIENCES SERVICES OR MYCOLOGY OR MANAGEMENT OR LINGUISTICS OR INSTRUMENTS INSTRUMENTATION OR MICROBIOLOGY OR INFORMATION SCIENCE LIBRARY SCIENCE OR MATHEMATICAL COMPUTATIONAL BIOLOGY OR GERIATRICS GERONTOLOGY OR ENGINEERING BIOMEDICAL OR FOOD SCIENCE TECHNOLOGY OR ENVIRONMENTAL STUDIES OR ENGINEERING ENVIRONMENTAL OR ENGINEERING ELECTRICAL ELECTRONIC OR HEALTH POLICY SERVICES OR TOXICOLOGY OR EDUCATION EDUCATIONAL RESEARCH OR NUTRITION DIETETICS OR SUBSTANCE ABUSE OR ECONOMICS OR MEDICINE RESEARCH EXPERIMENTAL OR STATISTICS PROBABILITY OR DEVELOPMENTAL BIOLOGY OR MEDICAL INFORMATICS OR SOCIOLOGY OR DENTISTRY ORAL SURGERY MEDICINE OR PSYCHOLOGY EXPERIMENTAL OR COMPUTER SCIENCE ARTIFICIAL INTELLIGENCE OR METEOROLOGY ATMOSPHERIC SCIENCES OR CHEMISTRY ANALYTICAL OR MEDICAL LABORATORY TECHNOLOGY OR CELL BIOLOGY OR DEMOGRAPHY OR BUSINESS FINANCE OR COMPUTER SCIENCE INTERDISCIPLINARY APPLICATIONS OR AUDIOLOGY SPEECH LANGUAGE PATHOLOGY OR PSYCHOLOGY DEVELOPMENTAL OR COMPUTER SCIENCE INFORMATION SYSTEMS OR PLANNING DEVELOPMENT )  
Indexes=SCI-EXPANDED, SSCI, CPCI-S, CPCI-SSH Timespan=1900-2015
- # [499](#) #17 OR #1
- 18 Indexes=SCI-EXPANDED, SSCI, CPCI-S, CPCI-SSH Timespan=1900-2015
- # [487](#) #16 AND #15

- 1  
2  
3  
4  
5  
6  
7  
8  
9  
10  
11  
12  
13  
14  
15  
16  
17  
18  
19  
20  
21  
22  
23  
24  
25  
26  
27  
28  
29  
30  
31  
32  
33  
34  
35  
36  
37  
38  
39  
40  
41  
42  
43  
44  
45  
46
- 17 Indexes=SCI-EXPANDED, SSCI, CPCI-S, CPCI-SSH Timespan=1900-2015
- # [8,044](#) #14 OR #13 OR #12 OR #11 OR #10 OR #9 OR #8 OR #7 OR #6 OR #5 OR #4 OR #3 OR #2
- 16 Indexes=SCI-EXPANDED, SSCI, CPCI-S, CPCI-SSH Timespan=1900-2015
- # [1,689,232](#) **TOPIC:** (( pediatric\* OR paediatric\* OR infant\* OR child\* OR baby OR toddler OR babies OR teen\* OR adolescent\*))
- 15 Indexes=SCI-EXPANDED, SSCI, CPCI-S, CPCI-SSH Timespan=1900-2015
- # [130](#) **TOPIC:** ("Severity of Illness Index" and ((tool\* or scor\* or index\* or indicator\* or indice\* or assessment\* or instrument\* or criteria or parameter\*) SAME ((prevent\* or reduc\* or improv\*) SAME (deteriorat\* or mortality or death or outcome\* or harm\* or safety))))
- 14 Indexes=SCI-EXPANDED, SSCI, CPCI-S, CPCI-SSH Timespan=1900-2015
- # [63](#) **TOPIC:** (("early medical intervention" SAME (tool\* or scor\* or index\* or indicator\* or indice\* or assessment\* or guide\* or instrument\* or criteria or parameter\* or deteriorat\* or mortality or death or monitor\* or outcome\* or harm\* or safety)))
- 13 Indexes=SCI-EXPANDED, SSCI, CPCI-S, CPCI-SSH Timespan=1900-2015
- # [28](#) **TOPIC:** ("early medical intervention" and ((prevent\* or reduc\* or improv\*) SAME (deteriorat\* or mortality or death or outcome\* or harm\* or safety)))
- 12 Indexes=SCI-EXPANDED, SSCI, CPCI-S, CPCI-SSH Timespan=1900-2015
- # [1,206](#) **TOPIC:** ("early warning" SAME system\* SAME (deteriorat\* or mortality or death or outcome\* or harm\* or safety))
- 11 Indexes=SCI-EXPANDED, SSCI, CPCI-S, CPCI-SSH Timespan=1900-2015
- # [2](#) **TOPIC:** ("SBAR technique")
- 10 Indexes=SCI-EXPANDED, SSCI, CPCI-S, CPCI-SSH Timespan=1900-2015
- # [7](#) **TOPIC:** ("VitalPAC Early Warning Score")
- 9 Indexes=SCI-EXPANDED, SSCI, CPCI-S, CPCI-SSH Timespan=1900-2015
- # [123](#) **TOPIC:** ("activation criteria")
- 8 Indexes=SCI-EXPANDED, SSCI, CPCI-S, CPCI-SSH Timespan=1900-2015
- # [16](#) TS=("alert criteria")
- 7 Indexes=SCI-EXPANDED, SSCI, CPCI-S, CPCI-SSH Timespan=1900-2015
- # [159](#) TS=("trigger tool\*")
- 6 Indexes=SCI-EXPANDED, SSCI, CPCI-S, CPCI-SSH Timespan=1900-2015
- # [45](#) TS=("track and trigger")

1  
2  
3  
4  
5  
6  
7  
8  
9  
10  
11  
12  
13  
14  
15  
16  
17  
18  
19  
20  
21  
22  
23  
24  
25  
26  
27  
28  
29  
30  
31  
32  
33  
34  
35  
36  
37  
38  
39  
40  
41  
42  
43  
44  
45  
46

5 Indexes=SCI-EXPANDED, SSCI, CPCI-S, CPCI-SSH Timespan=1900-2015  
# [15](#) TS=("track-and-trigger system")  
4 Indexes=SCI-EXPANDED, SSCI, CPCI-S, CPCI-SSH Timespan=1900-2015  
# [6,100](#) TS=("Rapid Response")  
3 Indexes=SCI-EXPANDED, SSCI, CPCI-S, CPCI-SSH Timespan=1900-2015  
# [604](#) TS=("early warning" SAME scor\*)  
2 Indexes=SCI-EXPANDED, SSCI, CPCI-S, CPCI-SSH Timespan=1900-2015  
# [88](#) TS=("Paediatric Early Warning" OR "Pediatic Early Warning" OR "Pediatic Advanced Warning Score"  
1 OR "Paediatric Advanced Warning Score" OR "neonatal early warning" OR "infant early warning" OR  
"pediatric rapid response" OR "Paedatric rapid response")  
Indexes=SCI-EXPANDED, SSCI, CPCI-S, CPCI-SSH Timespan=1900-2015

#### PUMA Supplementary searches

##### Search terms to use:

"Pediatric Early warning"  
"Paediatric Early warning"  
"Pediatric Rapid Response Team"  
"Paediatric Rapid Response Team"  
PEWS  
"Paediatric trigger tools"  
"Pediatric trigger tools"

## Supplementary Table 2 - PICOS criteria for inclusion of studies

### Question 1 – development / validation studies

| Parameter           | Inclusion criteria                                                                                                                                                                                                         | Exclusion criteria                                                       |
|---------------------|----------------------------------------------------------------------------------------------------------------------------------------------------------------------------------------------------------------------------|--------------------------------------------------------------------------|
| <i>Patients</i>     | Children aged 0-18 who are in-patients in a hospital                                                                                                                                                                       | Adult patients; children in emergency departments or neonatal unit       |
| <i>Intervention</i> | Development or validation of a PTTT                                                                                                                                                                                        | Acuity or triage tools, tools developed for use in emergency departments |
| <i>Comparator</i>   | Not applicable                                                                                                                                                                                                             |                                                                          |
| <i>Outcomes</i>     | Mortality and critical events including: arrests, code calls, transfer to higher level of care (e.g., ICU/HDU), senior review, RRT/MET activation, acuity at PICU admission and critical interventions on the ward or PICU |                                                                          |
| <i>Study design</i> | Chart or case reviews; cohort studies; case-control studies, observational studies                                                                                                                                         | Reviews, editorials or opinion pieces                                    |

### Question 2 – effectiveness studies

| Parameter           | Inclusion criteria                                                                                                                                                                                                                                                        | Exclusion criteria                                                                                                                                        |
|---------------------|---------------------------------------------------------------------------------------------------------------------------------------------------------------------------------------------------------------------------------------------------------------------------|-----------------------------------------------------------------------------------------------------------------------------------------------------------|
| <i>Patients</i>     | Children aged 0-18 who are in-patients in a hospital                                                                                                                                                                                                                      | Adult patients<br>Children in emergency departments or neonatal unit                                                                                      |
| <i>Intervention</i> | Implementation of any 'paediatric early warning system' intervention (with or without a PTTT) – including implementing a new PTTT, RRT/MET implementation, educational initiatives or communications tools aimed at improving identification of deteriorating in-patients | Acuity or triage tools, tools developed for use in emergency departments, interventions whose purpose was not identification of deteriorating in-patients |
| <i>Comparator</i>   | Not applicable                                                                                                                                                                                                                                                            |                                                                                                                                                           |
| <i>Outcomes</i>     | Mortality and critical events including: arrests, code calls, transfer to higher level of care (e.g., ICU/HDU), senior review, RRT/MET activation, acuity at PICU admission and critical interventions on the ward or PICU                                                |                                                                                                                                                           |
| <i>Study design</i> | Randomised controlled trials, non-randomised controlled trials, before-after studies (controlled or uncontrolled); interrupted time series studies                                                                                                                        | Reviews, editorials or opinion pieces                                                                                                                     |

## Supplementary Table 3 – Template Quality Assessment Forms

## QUALITY ASSESSMENT FOR DEVELOPMENT AND VALIDATION STUDIES

| Criteria     | Yes (2)                                                                 | Partial (1)                                                                                          | No (0)                                                                                                                                 | N/A                                                                     | Score                                     |
|--------------|-------------------------------------------------------------------------|------------------------------------------------------------------------------------------------------|----------------------------------------------------------------------------------------------------------------------------------------|-------------------------------------------------------------------------|-------------------------------------------|
| 1            | Is the hypothesis / aim / objective of the study clearly described?     | Easily identified in introduction / method.                                                          | Vague / incomplete or found in other parts of paper (than introduction/method)                                                         | Aim / Objective no reported                                             |                                           |
| 2            | Was the score developed comprehensively?                                | Evidence base / Expert opinion / Delphi method                                                       | Decided within research team                                                                                                           | No info / unclear                                                       |                                           |
| 3            | Are the characteristics of the patients in the study clearly described? | Reproducible criteria used to categorise participants                                                | Poorly define criteria / incomplete information                                                                                        | No baseline / demographic info                                          |                                           |
| 4            | Is the study design well described and appropriate?                     | Well described, easy to find in paper                                                                | Design not clearly described / design only partially answers the question                                                              | Design poorly described or does not answer study question               |                                           |
| 5            | Are the study sample representative of the intended population?         | A full description of the target population is given with the sample selected in a non-biased manner | Sample selected from a known population however, selection strategy likely introduces bias but not enough to seriously distort results | Sample recruited from an unknown population in an opportunistic fashion |                                           |
| 6            | Are population characteristics controlled for and adequately described? | Appropriate control at design/analysis stage                                                         | Incomplete control/description or not considered but unlikely to seriously influence results                                           | Not controlled for and likely to seriously influence results            |                                           |
| 7            | Was compliance/use of the PEWS reliable?                                | Compliance / use was well described and reliably implemented                                         | Compliance / use was not well described or not reliably implemented                                                                    | Compliance / use was not reported                                       |                                           |
| 8            | Was consideration given for data collected at different times / sites   | Well described reason why data was collected at different time points                                | Data was collected at different times due to specific opportunity                                                                      | No explanation for data collection at different time points             | Data was collected at the same time point |
| 9            | Are the main findings clearly described?                                | Simple outcome data reported for all major findings                                                  | Incomplete or inappropriate descriptive statistics                                                                                     | No/inadequate descriptive statistics                                    |                                           |
| 10           | Are methods of analysis adequately described and appropriate?           | Described and appropriate                                                                            | Not reported but probably appropriate or some tests appropriate, some not                                                              | Methods not described and cannot be determined                          |                                           |
| 11           | Are the conclusions supported by the results                            | All conclusions supported by data                                                                    | Some of the major conclusions are supported by the data; some are not or speculative interpretations are not indicated as such         | None/few of major conclusions supported by the data                     |                                           |
| 12           | How was missing data handled                                            | Missing data was reported and handled appropriately                                                  | Missing data was reported but unable to determine how it was handled or it wasn't handled appropriately                                | Missing data was not reported                                           | No missing data                           |
| <b>Total</b> |                                                                         |                                                                                                      |                                                                                                                                        |                                                                         |                                           |

MAX. Score: 24

## QUALITY ASSESSMENT FOR EFFECTIVENESS STUDIES

| Criteria     | Yes (2)                                                                 | Partial (1)                                                                                          | No (0)                                                                                                                                 | N/A                                                                     | Score                                     |
|--------------|-------------------------------------------------------------------------|------------------------------------------------------------------------------------------------------|----------------------------------------------------------------------------------------------------------------------------------------|-------------------------------------------------------------------------|-------------------------------------------|
| 1            | Is the hypothesis / aim / objective of the study clearly described?     | Easily identified in introduction / method.                                                          | Vague / incomplete or found in other parts of paper (than introduction/method)                                                         | Aim / Objective no reported                                             |                                           |
| 2            | Was the score developed comprehensively?                                | Evidence base / Expert opinion / Delphi method                                                       | Decided within research team                                                                                                           | No info / unclear                                                       |                                           |
| 3            | Are the characteristics of the patients in the study clearly described? | Reproducible criteria used to categorise participants                                                | Poorly define criteria / incomplete information                                                                                        | No baseline / demographic info                                          |                                           |
| 4            | Is the study design well described and appropriate?                     | Well described, easy to find in paper                                                                | Design not clearly described / design only partially answers the question                                                              | Design poorly described or does not answer study question               |                                           |
| 5            | Are the study sample representative of the intended population?         | A full description of the target population is given with the sample selected in a non-biased manner | Sample selected from a known population however, selection strategy likely introduces bias but not enough to seriously distort results | Sample recruited from an unknown population in an opportunistic fashion |                                           |
| 6            | Was the PEWS well implemented?                                          | Implementation was well reported and appropriately applied                                           | Implementation was not well reported or not appropriate                                                                                | No info / unclear                                                       |                                           |
| 7            | Are population characteristics controlled for and adequately described? | Appropriate control at design/analysis stage                                                         | Incomplete control/description or not considered but unlikely to seriously influence results                                           | Not controlled for and likely to seriously influence results            |                                           |
| 8            | Was compliance/use of the PEWS reliable?                                | Compliance / use was well described and reliably implemented                                         | Compliance / use was not well described or not reliably implemented                                                                    | Compliance / use was not reported                                       |                                           |
| 9            | Was consideration given for data collected at different times / sites   | Well described reason why data was collected at different time points                                | Data was collected at different times due to specific opportunity                                                                      | No explanation for data collection at different time points             | Data was collected at the same time point |
| 10           | Are the main findings clearly described?                                | Simple outcome data reported for all major findings                                                  | Incomplete or inappropriate descriptive statistics                                                                                     | No/inadequate descriptive statistics                                    |                                           |
| 11           | Are methods of analysis adequately described and appropriate?           | Described and appropriate                                                                            | Not reported but probably appropriate or some tests appropriate, some not                                                              | Methods not described and cannot be determined                          |                                           |
| 12           | Are the conclusions supported by the results                            | All conclusions supported by data                                                                    | Some of the major conclusions are supported by the data; some are not or speculative interpretations are not indicated as such         | None/few of major conclusions supported by the data                     |                                           |
| 13           | How was missing data handled                                            | Missing data was reported and handled appropriately                                                  | Missing data was reported but unable to determine how it was handled or it wasn't handled appropriately                                | Missing data was not reported                                           | No missing data                           |
| <b>Total</b> |                                                                         |                                                                                                      |                                                                                                                                        |                                                                         |                                           |

**MAX. Score: 26**

Supplementary Table 4 –Validation papers excluded from analysis

| PTTT                                                      | First author, year          | Country | Study population                            | Study design                       | Number of centres | PTTT used in practice? | Internal / external validation study? | Outcome measures                                  | Sample size     | Score or trigger? | Study overview and reason for exclusion from validation results                                                                                                                                                                                                                                                                                                                                                                                                                                                                                     | Quality score (max = 24) |
|-----------------------------------------------------------|-----------------------------|---------|---------------------------------------------|------------------------------------|-------------------|------------------------|---------------------------------------|---------------------------------------------------|-----------------|-------------------|-----------------------------------------------------------------------------------------------------------------------------------------------------------------------------------------------------------------------------------------------------------------------------------------------------------------------------------------------------------------------------------------------------------------------------------------------------------------------------------------------------------------------------------------------------|--------------------------|
| Modified Brighton PEWS (a)                                | Garlick 2013 <sup>20</sup>  | US      | All in-patients (MET calls only)            | Case-control study (retrospective) | 1                 | N                      | Ext                                   | Transfer to PICU                                  | 267 (116 cases) | S                 | Describes review of MET calls (n=267) to evaluate predictive ability of Modified Brighton PEWS tool for identifying children requiring transfer to PICU (n=116). Results presented in terms of association between PEWS and odds of transfer to higher level of care – no evaluation of performance characteristics such as AUROC, sensitivity or specificity.                                                                                                                                                                                      | 8                        |
|                                                           | Medar 2015 <sup>21</sup>    | Unclear | RRT calls only                              | Chart review (retrospective)       | 1                 | NR                     | Ext                                   | RRT call                                          | 61              | S                 | Describes retrospective review of RRT calls (n=61) to evaluate Modified Brighton PEWS at time of admission and time of RRT call. Report higher median PEWS score for patients at time of RRT call compared to admission. No evaluation of performance characteristics such as AUROC, sensitivity or specificity.                                                                                                                                                                                                                                    | 6                        |
| Texas Children's Hospital (TCH) PAWS                      | Bell 2013 <sup>22</sup>     | US      | General medical ward & two specialist units | Chart review (retrospective)       | 1                 | Y                      | Int                                   | Other validated scales (e.g., Glasgow Coma Scale) | 150             | S                 | Describes development and implementation of the TCH PAWS tool in three wards of a specialist paediatric unit in the US. TCH PAWS amended locally from the Brighton PEWS. Reports on internal reliability (correlation coefficients between 3 categories of the score) and inter-rater reliability of scoring among nurses. Also compares scores on sub-categories to other measures, e.g., the Behavioural sub-score is compared to the Glasgow Coma Scale. No evaluation of performance characteristics such as AUROC, sensitivity or specificity. | 12                       |
| Cardiac Children's Hospital Early Warning Score (C-CHEWS) | McLellan 2013 <sup>23</sup> | US      | Cardiac unit                                | Tool development                   | 1                 | Y                      | Int                                   | Cardiac ICU transfer                              | 27              | S                 | Describes the development and implementation of a modified version of the Children's Hospital Early Warning score for cardiac patients. Results focus on tool modification and implementation challenges – no evaluation of performance characteristics such as AUROC, sensitivity or specificity. Validation of the tool described in a separate paper.                                                                                                                                                                                            | 9                        |
| Burn-specific PEWS                                        | Rahman 2014 <sup>24</sup>   | US      | Specialist burn unit                        | Chart review (retrospective)       | 1                 | Y                      | Int                                   | Burn injuries                                     | 50              | S                 | Conference abstract only. Describes development and implementation of a modified version of the Brighton PEWS, for use with in-patients with burn injuries. Analysis of 50 randomly selected charts – results focus on compliance with scoring and relationship between PTTT score and extent of burn injuries. No evaluation of performance characteristics such as AUROC, sensitivity or specificity.                                                                                                                                             | 13                       |

|   |                                                                                                                                                                                                                                                                                                                                                                                                                               |                              |       |                                                |                                    |   |   |     |                                                                          |                 |   |                                                                                                                                                                                                                                                                                                                                                                                                                                                                                                                                                                                                |    |  |
|---|-------------------------------------------------------------------------------------------------------------------------------------------------------------------------------------------------------------------------------------------------------------------------------------------------------------------------------------------------------------------------------------------------------------------------------|------------------------------|-------|------------------------------------------------|------------------------------------|---|---|-----|--------------------------------------------------------------------------|-----------------|---|------------------------------------------------------------------------------------------------------------------------------------------------------------------------------------------------------------------------------------------------------------------------------------------------------------------------------------------------------------------------------------------------------------------------------------------------------------------------------------------------------------------------------------------------------------------------------------------------|----|--|
| 1 | Bedside PEWS                                                                                                                                                                                                                                                                                                                                                                                                                  | Hopkins 2013 <sup>25</sup>   | US    | All in-patients (code blue and RRT calls only) | Chart review (retrospective)       | 1 | N | Ext | PICU transfer and critical intervention in PICU among RRT and code calls | 113 (64 cases)  | S | Conference abstract only. Describes retrospective chart review of code blue and RRT calls over a year – Bedside PEWS scores calculated and comparisons drawn between patients eventually transferred to PICU and those who stayed on ward. Preliminary analysis given in terms of mean PEWS scores for different groups – no evaluation of performance characteristics such as AUROC, sensitivity or specificity.                                                                                                                                                                              | 6  |  |
| 2 |                                                                                                                                                                                                                                                                                                                                                                                                                               | Gawronski 2013 <sup>26</sup> | Italy | Bone marrow transplant unit                    | Case-control study (retrospective) | 1 | N | Ext | Urgent PICU transfer, PICU consult or death                              | 21 (11 cases)   | S | Conference abstract only. Describes case-control study evaluating Bedside PEWS in an Italian bone marrow transplant unit, in relation to urgent PICU transfers or consultations. Preliminary analysis only – comparison of mean PTTT scores for cases and controls. No evaluation of performance characteristics such as AUROC, sensitivity or specificity.                                                                                                                                                                                                                                    | 6  |  |
| 3 | Bristol PEWT                                                                                                                                                                                                                                                                                                                                                                                                                  | Haines 2006 <sup>12</sup>    | UK    | All in-patients                                | Chart review (retrospective)       | 1 | Y | Int | Transfer to PICU or HDU                                                  | 360 (180 cases) | T | Describes development and piloting of the Bristol PEWT in a UK tertiary centre. Only included children who would have triggered the pilot version of the tool (n=360) and then identified PICU or HDU transfers from this population. Paper presents specificity and sensitivity outcomes but they are incorrectly calculated, so results not included in analysis.                                                                                                                                                                                                                            | 9  |  |
| 4 | Modified Bristol PEWT (a)                                                                                                                                                                                                                                                                                                                                                                                                     | Sefton 2014 <sup>27</sup>    | UK    | All in-patients                                | Chart review (retrospective)       | 1 | Y | Int | Transfer to PICU, cardiac / respiratory arrest or unexpected death       | Unclear         | T | Conference abstract only. Describes a retrospective review of 5 years of data from locally implemented PTTT in a UK tertiary centre, presenting a multiple regression model identifying seven components (including age) most strongly associated with subsequent adverse event if triggered. Of the six clinical elements, all were associated with increased odds of an adverse event, except nurse concern which was significantly associated with decreased odds of an adverse event. No evaluation of overall PTTT performance characteristics such as AUROC, sensitivity or specificity. | 10 |  |
| 5 | PTTT names refer to those described in Table 2                                                                                                                                                                                                                                                                                                                                                                                |                              |       |                                                |                                    |   |   |     |                                                                          |                 |   |                                                                                                                                                                                                                                                                                                                                                                                                                                                                                                                                                                                                |    |  |
| 6 | All studies conducted in a specialist / tertiary centre.                                                                                                                                                                                                                                                                                                                                                                      |                              |       |                                                |                                    |   |   |     |                                                                          |                 |   |                                                                                                                                                                                                                                                                                                                                                                                                                                                                                                                                                                                                |    |  |
| 7 | Studies classified as internal validation if the setting for the study was the same hospital and same research team as those who developed the score. Studies classified as external validation if the score was tested in a different centre and by a different research team to those who developed it.                                                                                                                     |                              |       |                                                |                                    |   |   |     |                                                                          |                 |   |                                                                                                                                                                                                                                                                                                                                                                                                                                                                                                                                                                                                |    |  |
| 8 | PTTT, paediatric track and trigger tool; S, score; T, trigger; AUROC, area under the receiver operating characteristic curve; PPV, positive predictive value, NPV, negative predictive value; PICU, paediatric intensive care unit; PHDU, paediatric high-dependency unit; RRT, rapid response team; HFNC, high flow nasal cannula; UK, United Kingdom; US, United States; Int, Internal validation; Ext, external validation |                              |       |                                                |                                    |   |   |     |                                                                          |                 |   |                                                                                                                                                                                                                                                                                                                                                                                                                                                                                                                                                                                                |    |  |



Supplementary Table 5 – Effectiveness papers excluded from analysis

| First author, year          | Intervention           |                           |                             |                            | PTTT                       | Country | Number of centres | Specialist unit? | Existing RRT / MET? | Population                      | Study design                                    | Study duration in months (before & after intervention) | Description and reason for excluding from analysis                                                                                                                                                                                                                                                                                                                                                                          | Quality score (max = 26) |
|-----------------------------|------------------------|---------------------------|-----------------------------|----------------------------|----------------------------|---------|-------------------|------------------|---------------------|---------------------------------|-------------------------------------------------|--------------------------------------------------------|-----------------------------------------------------------------------------------------------------------------------------------------------------------------------------------------------------------------------------------------------------------------------------------------------------------------------------------------------------------------------------------------------------------------------------|--------------------------|
|                             | Implemented a new PTTT | Implemented new RRT / MET | Modified escalation process | Staff training / education |                            |         |                   |                  |                     |                                 |                                                 |                                                        |                                                                                                                                                                                                                                                                                                                                                                                                                             |                          |
| Mistry 2006 <sup>51</sup>   | ✓                      | ✓                         |                             | ✓                          | PRRT activation criteria*  | US      | 1                 | Y                | N                   | All in-patients                 | Uncontrolled before-after study (prospective)   | 11 (6 before, 5 after)                                 | Describes implementation of a PRRT with calling criteria (not defined). Looked at impact on mortality, cardiac arrests and PICU outcomes among PICU transfers. Reports absolute decreases in numbers of deaths and arrests post-intervention, but no denominator data provided or further statistical details given.                                                                                                        | 3                        |
| Demmel 2010 <sup>52</sup>   | ✓                      |                           |                             |                            | Modified Brighton PEWS (e) | US      | 1                 | Y                | Y                   | Haematology / oncology patients | Uncontrolled before-after study (prospective)   | Unclear (unclear, 8 after)                             | Implemented a locally modified version of the Brighton PEWS in a specialist haematology / oncology unit. Discusses challenges in the development and implementation of the tool. Refers to number of days between cardiopulmonary arrests being 299 immediately before implementation, and 1,053 days eight months after implementation – however, no denominator data or further statistical details given.                | 8                        |
| Sandhu 2010 <sup>53</sup>   |                        | ✓                         |                             |                            | Unclear                    | UK      | 1                 | Y                | N                   | Unclear                         | Uncontrolled before-after study (retrospective) | Unclear (unclear, 3 months)                            | Conference abstract only. Reported implementing an ‘outreach response team’ alongside an existing ‘paediatric early warning tool’ (unclear which tool) in a UK tertiary centre. Reference to comparable triggering rate of PTTT before (28% of patients) and after (28% of patients) piloting the outreach team, and 2 arrests before piloting, and 0 after – but no denominator data or further statistical details given. | 8                        |
| Randhawa 2011 <sup>54</sup> | ✓                      |                           | ✓                           | ✓                          | Brighton PEWS              | US      | 1                 | Y                | Y                   | All in-patients                 | Uncontrolled before-after study (prospective)   | Unclear                                                | Describes implementation of the Brighton PEWS in a specialist paediatric centre. Details various cycles of change during implementation of the tool across different wards, and efforts at staff education. Reports reduction in rate of cardiopulmonary arrests post-intervention, but no absolute numbers, denominator data or further statistical details given.                                                         | 12                       |

|                             |   |   |  |   |                                                                           |    |   |   |   |                                 |                                                 |                                    |                                                                                                                                                                                                                                                                                                                                                                                                                                           |   |
|-----------------------------|---|---|--|---|---------------------------------------------------------------------------|----|---|---|---|---------------------------------|-------------------------------------------------|------------------------------------|-------------------------------------------------------------------------------------------------------------------------------------------------------------------------------------------------------------------------------------------------------------------------------------------------------------------------------------------------------------------------------------------------------------------------------------------|---|
| Camacho 2011 <sup>55</sup>  | ✓ |   |  |   | Modified Brighton PEWS (a) †                                              | US | 1 | Y | N | Cardiac and renal patients      | Uncontrolled before-after study (prospective)   | 8<br>(3 before, 5 after)           | Conference abstract only. Reported piloting and modifying Tucker's modified Brighton PEWS for specialist cardiac and renal population. Unclear if RRT/MET in place. Referred to there being 5 code calls in the quarter (3 months) before implementation, and 0 in the following 5 months. However, no denominator data or further statistical details given.                                                                             | 8 |
| Heyden 2012 <sup>56</sup>   | ✓ | ✓ |  |   | PRRT activation criteria*                                                 | US | 1 | Y | N | All in-patients                 | Uncontrolled before-after study (retrospective) | 72<br>(24 before, 48 after)        | Conference abstract only. Describes implementation of an RRT in a US tertiary centre, with an associated 'broad calling criteria' (limited details given). Reports number of cardiac arrests on ward and PICU before and after intervention, and refers to increase in RRT calls over time. No denominator data or further statistical details given.                                                                                     | 7 |
| Somberg 2013                | ✓ | ✓ |  |   | Unclear                                                                   | US | 1 | N | N | All in-patients                 | Uncontrolled before-after study (unclear)       | Unclear                            | Conference abstract only. Reported developing and implementing a PTTT (tool not named) and RRT for a paediatric unit in a community hospital. Reference to no intubation or code calls since intervention, but no pre-intervention comparison, time frames, denominator data or further statistical details given.                                                                                                                        | 2 |
| Norville 2013 <sup>57</sup> | ✓ |   |  |   | Texas Children's Hospital (TCH) Paediatric Advanced Warning Score (PAWS)† | US | 1 | Y | Y | Bone marrow transplant patients | Uncontrolled before-after study (unclear)       | 23<br>(12 before, 11 after)        | Conference abstract only. Describes implementation of TCH PAWS, with amended algorithm for specialist bone marrow transplant unit. Looked at impact on code calls and RRT calls – refers to 3 code calls and 18 RRT calls pre-intervention, compared to 0 codes and 25 RRT calls post-intervention. No denominator data or further statistical details given.                                                                             | 5 |
| Ambati 2014 <sup>58</sup>   |   |   |  | ✓ | Not applicable                                                            | US | 1 | Y | Y | Unclear                         | Uncontrolled before-after study (unclear)       | 48<br>(12 before, 36 after)        | Conference abstract only. Reported effect of implementing a "simulation based curriculum" for clinical staff on subsequent RRT utilisation. Reference to increase in RRT calls year on year post implementation, but no denominator data or further statistical details given.                                                                                                                                                            | 3 |
| Ocholi 2014 <sup>59</sup>   | ✓ |   |  |   | Bedside PEWS                                                              | UK | 1 | Y | N | Unclear                         | Uncontrolled before-after study (unclear)       | 12 months<br>(6 before, 6 after)   | Conference abstract only. Describes implementation of Bedside PEWS in a UK tertiary centre. Looked at impact of intervention on ward outcomes and outcomes of children transferred to PICU. Reference to impact of tool on number of 'adverse incidents' (not defined) on the ward and median length of stay in PICU among PICU transfers, but no denominator data or further statistical details given.                                  | 6 |
| Fenix 2016 <sup>39</sup>    | ✓ |   |  | ✓ | Unclear                                                                   | US | 1 | Y | N | Two general paediatric wards    | Uncontrolled before-after study (retrospective) | 46 months<br>(16 before, 30 after) | Conference abstract only. Describes implementation of a 'Situational Awareness' tool, with integrated PTTT (unclear which tool) in a tertiary centre. Retrospective review of rates of Critical Deterioration (CD) events on two of seven general paediatric wards. Reports a significant decrease in trend and trajectory of CD events post-implementation, but no event numbers, denominator data or further statistical details given. | 6 |

1  
2  
3  
4  
5  
6  
7  
8  
9  
10  
11  
12  
13  
14  
15  
16  
17  
18  
19  
20  
21  
22  
23  
24  
25  
26  
27  
28  
29  
30  
31  
32  
33  
34  
35  
36  
37  
38  
39  
40  
41  
42  
43  
44  
45  
46

PTTT names refer to those described in Table 2

\* Indicates PTTT not fully described or validated in the published literature

† PTTT modified by local team, but exact modifications not described

PTTT, paediatric track and trigger tool; RRT, rapid response team; MET, medical emergency team; PICU, paediatric intensive care unit; US, United States; UK, United Kingdom

For peer review only

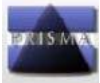

# PRISMA 2009 Checklist

| Section/topic                      | #  | Checklist item                                                                                                                                                                                                                                                                                                        | Reported on page # |
|------------------------------------|----|-----------------------------------------------------------------------------------------------------------------------------------------------------------------------------------------------------------------------------------------------------------------------------------------------------------------------|--------------------|
| <b>TITLE</b>                       |    |                                                                                                                                                                                                                                                                                                                       |                    |
| Title                              | 1  | Identify the report as a systematic review, meta-analysis, or both.                                                                                                                                                                                                                                                   | 1                  |
| <b>ABSTRACT</b>                    |    |                                                                                                                                                                                                                                                                                                                       |                    |
| Structured summary                 | 2  | Provide a structured summary including, as applicable: background; objectives; data sources; study eligibility criteria, participants, and interventions; study appraisal and synthesis methods; results; limitations; conclusions and implications of key findings; systematic review registration number.           | 2-3                |
| <b>INTRODUCTION</b>                |    |                                                                                                                                                                                                                                                                                                                       |                    |
| Rationale                          | 3  | Describe the rationale for the review in the context of what is already known.                                                                                                                                                                                                                                        | 5-6                |
| Objectives                         | 4  | Provide an explicit statement of questions being addressed with reference to participants, interventions, comparisons, outcomes, and study design (PICOS).                                                                                                                                                            | 6                  |
| <b>METHODS</b>                     |    |                                                                                                                                                                                                                                                                                                                       |                    |
| Protocol and registration          | 5  | Indicate if a review protocol exists, if and where it can be accessed (e.g., Web address), and, if available, provide registration information including registration number.                                                                                                                                         | 7                  |
| Eligibility criteria               | 6  | Specify study characteristics (e.g., PICOS, length of follow-up) and report characteristics (e.g., years considered, language, publication status) used as criteria for eligibility, giving rationale.                                                                                                                | 7-8; Supp table 2  |
| Information sources                | 7  | Describe all information sources (e.g., databases with dates of coverage, contact with study authors to identify additional studies) in the search and date last searched.                                                                                                                                            | 7                  |
| Search                             | 8  | Present full electronic search strategy for at least one database, including any limits used, such that it could be repeated.                                                                                                                                                                                         | Supp table 1       |
| Study selection                    | 9  | State the process for selecting studies (i.e., screening, eligibility, included in systematic review, and, if applicable, included in the meta-analysis).                                                                                                                                                             | 7-8                |
| Data collection process            | 10 | Describe method of data extraction from reports (e.g., piloted forms, independently, in duplicate) and any processes for obtaining and confirming data from investigators.                                                                                                                                            | 7-8                |
| Data items                         | 11 | List and define all variables for which data were sought (e.g., PICOS, funding sources) and any assumptions and simplifications made.                                                                                                                                                                                 | 7                  |
| Risk of bias in individual studies | 12 | Describe methods used for assessing risk of bias of individual studies (including specification of whether this was done at the study or outcome level), and how this information is to be used in any data synthesis.                                                                                                | 8; Supp table 3    |
| Summary measures                   | 13 | State the principal summary measures (e.g., risk ratio, difference in means).                                                                                                                                                                                                                                         | 8                  |
| Synthesis of results               | 14 | Describe the methods of handling data and combining results of studies, if done, including measures of consistency (e.g., $I^2$ ) for each meta-analysis.<br><small>For peer review only: <a href="http://bmjopen.bmj.com/site/about/guidelines.xhtml">http://bmjopen.bmj.com/site/about/guidelines.xhtml</a></small> | NA                 |

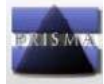

# PRISMA 2009 Checklist

Page 1 of 2

| Section/topic                 | #  | Checklist item                                                                                                                                                                                           | Reported on page # |
|-------------------------------|----|----------------------------------------------------------------------------------------------------------------------------------------------------------------------------------------------------------|--------------------|
| Risk of bias across studies   | 15 | Specify any assessment of risk of bias that may affect the cumulative evidence (e.g., publication bias, selective reporting within studies).                                                             | NA                 |
| Additional analyses           | 16 | Describe methods of additional analyses (e.g., sensitivity or subgroup analyses, meta-regression), if done, indicating which were pre-specified.                                                         | NA                 |
| <b>RESULTS</b>                |    |                                                                                                                                                                                                          |                    |
| Study selection               | 17 | Give numbers of studies screened, assessed for eligibility, and included in the review, with reasons for exclusions at each stage, ideally with a flow diagram.                                          | 9                  |
| Study characteristics         | 18 | For each study, present characteristics for which data were extracted (e.g., study size, PICOS, follow-up period) and provide the citations.                                                             | 9, Tables 2-4      |
| Risk of bias within studies   | 19 | Present data on risk of bias of each study and, if available, any outcome level assessment (see item 12).                                                                                                | Tables 2-4         |
| Results of individual studies | 20 | For all outcomes considered (benefits or harms), present, for each study: (a) simple summary data for each intervention group (b) effect estimates and confidence intervals, ideally with a forest plot. | Tables 3-4         |
| Synthesis of results          | 21 | Present results of each meta-analysis done, including confidence intervals and measures of consistency.                                                                                                  | NA                 |
| Risk of bias across studies   | 22 | Present results of any assessment of risk of bias across studies (see Item 15).                                                                                                                          | NA                 |
| Additional analysis           | 23 | Give results of additional analyses, if done (e.g., sensitivity or subgroup analyses, meta-regression [see Item 16]).                                                                                    | NA                 |
| <b>DISCUSSION</b>             |    |                                                                                                                                                                                                          |                    |
| Summary of evidence           | 24 | Summarize the main findings including the strength of evidence for each main outcome; consider their relevance to key groups (e.g., healthcare providers, users, and policy makers).                     | 16-20              |
| Limitations                   | 25 | Discuss limitations at study and outcome level (e.g., risk of bias), and at review-level (e.g., incomplete retrieval of identified research, reporting bias).                                            | 16-20              |
| Conclusions                   | 26 | Provide a general interpretation of the results in the context of other evidence, and implications for future research.                                                                                  | 16-20              |
| <b>FUNDING</b>                |    |                                                                                                                                                                                                          |                    |
| Funding                       | 27 | Describe sources of funding for the systematic review and other support (e.g., supply of data); role of funders for the systematic review.                                                               | 21                 |

From: Moher D, Liberati A, Tetzlaff J, Altman DG, The PRISMA Group (2009). Preferred Reporting Items for Systematic Reviews and Meta-Analyses: The PRISMA Statement. PLoS Med 6(7): e1000097. doi:10.1371/journal.pmed1000097

For more information, visit: [www.prisma-statement.org](http://www.prisma-statement.org).  
For peer review only - <http://bmjopen.bmj.com/site/about/guidelines.xhtml>

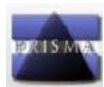

# PRISMA 2009 Checklist

For peer review only

- 1
- 2
- 3
- 4
- 5
- 6
- 7
- 8
- 9
- 10
- 11
- 12
- 13
- 14
- 15
- 16
- 17
- 18
- 19
- 20
- 21
- 22
- 23
- 24
- 25
- 26
- 27
- 28
- 29
- 30
- 31
- 32
- 33
- 34
- 35
- 36
- 37
- 38
- 39
- 40
- 41
- 42
- 43
- 44
- 45
- 46
- 47

# BMJ Open

## Validity and effectiveness of paediatric early warning systems and track and trigger tools for identifying and reducing clinical deterioration in hospitalised children: a systematic review

|                                 |                                                                                                                                                                                                                                                                                                                                                                                                                                                                                                                                                                                                                                                                                                                                                                                                                                                                                                                                                                                                                                                                                                                                                                                                                                                                                                                                   |
|---------------------------------|-----------------------------------------------------------------------------------------------------------------------------------------------------------------------------------------------------------------------------------------------------------------------------------------------------------------------------------------------------------------------------------------------------------------------------------------------------------------------------------------------------------------------------------------------------------------------------------------------------------------------------------------------------------------------------------------------------------------------------------------------------------------------------------------------------------------------------------------------------------------------------------------------------------------------------------------------------------------------------------------------------------------------------------------------------------------------------------------------------------------------------------------------------------------------------------------------------------------------------------------------------------------------------------------------------------------------------------|
| Journal:                        | <i>BMJ Open</i>                                                                                                                                                                                                                                                                                                                                                                                                                                                                                                                                                                                                                                                                                                                                                                                                                                                                                                                                                                                                                                                                                                                                                                                                                                                                                                                   |
| Manuscript ID                   | bmjopen-2018-022105.R3                                                                                                                                                                                                                                                                                                                                                                                                                                                                                                                                                                                                                                                                                                                                                                                                                                                                                                                                                                                                                                                                                                                                                                                                                                                                                                            |
| Article Type:                   | Research                                                                                                                                                                                                                                                                                                                                                                                                                                                                                                                                                                                                                                                                                                                                                                                                                                                                                                                                                                                                                                                                                                                                                                                                                                                                                                                          |
| Date Submitted by the Author:   | 07-Mar-2019                                                                                                                                                                                                                                                                                                                                                                                                                                                                                                                                                                                                                                                                                                                                                                                                                                                                                                                                                                                                                                                                                                                                                                                                                                                                                                                       |
| Complete List of Authors:       | Trubey, Rob; Cardiff University, Centre for Trials Research<br>Huang, Chao; Cardiff University, Centre for Trials Research<br>Lugg-Widger, Fiona; Cardiff University, Centre for Trials Research<br>Hood, Kerenza; Cardiff University, Centre for Trials Research<br>Allen, Davina; Cardiff University, School of Healthcare Sciences<br>Edwards, Dawn; Morriston Hospital, Department of Paediatrics<br>Lacy, David; Wirral University Teaching Hospital<br>Lloyd, Amy; Cardiff University, Centre for Trials Research<br>Mann, Mala; Cardiff University, University Library Services<br>Mason, Brendan; Public Health Wales<br>Oliver, Alison; Noah's Ark Children's Hospital for Wales, Department of Paediatric Intensive Care<br>Roland, Damian; Paediatric Emergency Medicine Leicester Academic (PEMLA) Group, Emergency Department<br>Sefton, G.; Alder Hey Children's NHS Fdn Trust,<br>Skone, Richard; Noah's Ark Children's Hospital for Wales, Department of Paediatric Intensive Care<br>Thomas-Jones, Emma; Cardiff University, Centre for Trials Research<br>Tume, Lyvonne N.; University of the West of England Bristol, Faculty of Health and Applied Sciences (HAS)<br>Powell, Colin; Children's Hospital for Wales, Paediatrics; Sidra Medical and Research Center, Department of Pediatric Emergency Medicine |
| <b>Primary Subject Heading</b>: | Paediatrics                                                                                                                                                                                                                                                                                                                                                                                                                                                                                                                                                                                                                                                                                                                                                                                                                                                                                                                                                                                                                                                                                                                                                                                                                                                                                                                       |
| Secondary Subject Heading:      | Paediatrics, Nursing, Intensive care, Health policy, Diagnostics                                                                                                                                                                                                                                                                                                                                                                                                                                                                                                                                                                                                                                                                                                                                                                                                                                                                                                                                                                                                                                                                                                                                                                                                                                                                  |
| Keywords:                       | Quality in health care < HEALTH SERVICES ADMINISTRATION & MANAGEMENT, Paediatric intensive & critical care < INTENSIVE & CRITICAL CARE, PAEDIATRICS                                                                                                                                                                                                                                                                                                                                                                                                                                                                                                                                                                                                                                                                                                                                                                                                                                                                                                                                                                                                                                                                                                                                                                               |
|                                 |                                                                                                                                                                                                                                                                                                                                                                                                                                                                                                                                                                                                                                                                                                                                                                                                                                                                                                                                                                                                                                                                                                                                                                                                                                                                                                                                   |

SCHOLARONE™  
Manuscripts

1  
2  
3  
4  
5  
6  
7  
8  
9  
10  
11  
12  
13  
14  
15  
16  
17  
18  
19  
20  
21  
22  
23  
24  
25  
26  
27  
28  
29  
30  
31  
32  
33  
34  
35  
36  
37  
38  
39  
40  
41  
42  
43  
44  
45  
46  
47  
48  
49  
50  
51  
52  
53  
54  
55  
56  
57  
58  
59  
60



1  
2  
3 **Validity and effectiveness of paediatric early warning systems and track and trigger**  
4 **tools for identifying and reducing clinical deterioration in hospitalised children: a**  
5 **systematic review**  
6  
7

8 **Authors:** Rob Trubey<sup>1†</sup>, Chao Huang<sup>1</sup>, Fiona Lugg-Widger<sup>1</sup>, Kerenza Hood<sup>1</sup>, Davina Allen<sup>2</sup>,  
9 Dawn Edwards<sup>3</sup>, David Lacy<sup>4</sup>, Amy Lloyd<sup>1</sup>, Mala Mann<sup>5</sup>, Brendan Mason<sup>6</sup>, Alison Oliver<sup>7</sup>,  
10 Damian Roland<sup>8</sup>, Gerri Sefton<sup>9</sup>, Richard Skone<sup>7</sup>, Emma Thomas-Jones<sup>1</sup>, Lyvonne Tume<sup>9</sup>,  
11 Colin Powell<sup>10,11</sup>  
12  
13

14 **1** Centre for Trials Research, Cardiff University, Heath Park, Cardiff, UK

15 **2** School of Healthcare Sciences, Cardiff University, Eastgate House, Cardiff, UK

16 **3** Department of Paediatrics, Morriston Hospital, Swansea, UK

17 **4** Wirral University Teaching Hospital, Wirral, UK

18 **5** Specialist Unit for Review Evidence (SURE), Cardiff University, Heath Park, Cardiff, UK

19 **6** Public Health Wales, Cardiff, UK

20 **7** Department of Paediatric Intensive Care, Children's Hospital for Wales, Cardiff, UK

21 **8** Paediatric Emergency Medicine Leicester Academic (PEMLA) Group, Emergency  
22 Department, Infirmary Square, Leicester, UK

23 **9** Paediatric Intensive Care Unit, Alder Hey Children's NHS Foundation Trust, Liverpool,  
24 UK

25 **10** Department of Child Health, Children's Hospital for Wales, Division of Population  
26 Medicine School of Medicine, Cardiff University, Cardiff, UK,

27 **11** Department of Pediatric Emergency Medicine, Sidra Medicine, Doha, Qatar  
28  
29  
30  
31  
32  
33

34 **Corresponding author:**

35 Dr. Rob Trubey, Centre for Trials Research, Cardiff University, Heath Park, Cardiff, UK  
36 [trubeyrj@cf.ac.uk](mailto:trubeyrj@cf.ac.uk)  
37  
38

39 **Keywords:** PEWS, track and trigger scores, early warning scores, clinical deterioration,  
40 children, systematic review  
41  
42  
43  
44  
45  
46  
47  
48  
49  
50  
51  
52  
53  
54  
55  
56  
57  
58  
59  
60

## ABSTRACT

### Objective

To assess (1) how well validated existing paediatric track and trigger tools (PTTT) are for predicting adverse outcomes in hospitalised children, and (2) how effective broader paediatric early warning systems are at reducing adverse outcomes in hospitalised children.

### Design

Systematic review.

### Data sources

British Nursing Index, CINAHL, Cochrane Central Register of Controlled Trials, Database of Abstracts of Reviews of Effectiveness, EMBASE, HMIC, Medline, Medline in Process, Scopus and Web of Knowledge searched through May 2018.

### Eligibility criteria

We included (1) papers reporting on the development or validation of a PTTT or (2) the implementation of a broader early warning system in paediatric units (age 0-18), where adverse outcome metrics were reported. Several study designs were considered.

### Data extraction and synthesis

Data extraction was conducted by two independent reviewers using template forms. Studies were quality assessed using a modified Downs and Black rating scale.

### Results

36 validation studies and 30 effectiveness studies were included, with 27 unique PTTT identified. Validation studies were largely retrospective case-control studies or chart reviews, while effectiveness studies were predominantly uncontrolled before-after studies. Metrics of adverse outcomes varied considerably. Some PTTT demonstrated good diagnostic accuracy in retrospective case-control studies (primarily for predicting PICU transfers) but positive predictive value was consistently low, suggesting potential for alarm fatigue. A small number of effectiveness studies reported significant decreases in mortality, arrests or code calls, but were limited by methodological concerns. Overall, there was limited evidence of paediatric early warning system interventions leading to reductions in deterioration.

**Conclusion**

There are several fundamental methodological limitations in the PTTT literature, and the predominance of single-site studies carried out in specialist centres greatly limits generalisability. With limited evidence of effectiveness, calls to make PTTT mandatory across all paediatric units are not supported by the evidence base.

PROSPERO registration number: CRD42015015326.

For peer review only

## STRENGTHS AND LIMITATIONS OF THIS STUDY

- Paediatric early warning systems and paediatric track and trigger tools (PTTT) are increasingly used by paediatric units across Europe, North America, Australia and elsewhere – this study is a timely review of the evidence for their validity and effectiveness
- A comprehensive search was carried out across multiple databases and included published as well as grey literature
- The review highlights methodological weaknesses and gaps in the current evidence base and makes suggestions for future research
- Heterogeneity in study populations, study designs and outcome measures make it difficult to compare and synthesise findings across the wide range of early warning systems and PTTT being used in practice
- The review is limited in scope to quantitative validation and effectiveness studies, so must be considered alongside wider literature reflecting on potential secondary benefits of early warning systems and PTTT for communication, teamwork and empowerment

## BACKGROUND

Failure to recognise and respond to clinical deterioration in hospitalised children is a major safety concern in healthcare. The underlying causes of this problem are clearly multifactorial<sup>1-3</sup> but paediatric ‘early warning systems’ have been strongly advocated as one approach to improving recognition of deterioration in paediatric units<sup>1,2,4</sup>.

A paediatric ‘early warning system’ can be considered any patient safety initiative or programme which aims to monitor, detect and respond to signs of deterioration in hospitalised children in order to avert adverse outcomes and premature death. Such systems are often multi-faceted and may include the use of rapid response teams (RRT) or medical emergency teams (MET), education or training to improve clinical staff’s ability to identify deterioration or strategies aimed at improving staff communication and situational awareness.

An increasingly commonplace paediatric ‘early warning system’ initiative is the use of a ‘track and trigger tool’: these tools, also commonly used in adult care, provide a formal framework for evaluating routine physiological, clinical and observational data for early indicators of patient deterioration. They are typically integrated into routine observation charts or electronic health records and compare patient observations to pre-defined ‘normal’ thresholds. When one or more observation is considered abnormal, staff are directed to various clinical actions, including but not limited to altered frequency of observations, review by senior staff or more appropriate treatment or management. Tools may be paper based or electronic and monitoring may be automated or manually undertaken by staff.

These tools have been referred to in the literature using a number of different terms: paediatric early warning scores (PEWS); paediatric early warning tools (PEWT), track and trigger tools (TTT) and many others. Here, we refer to the tools themselves using the term ‘paediatric track and trigger tools’ (PTTT). A variety of PTTT have been developed, typically by teams based in specialist paediatric centres and often used as a means of triggering a dedicated response team. Their advocacy has recently led to widespread uptake across a variety of different paediatric units, including many non-specialist centres where patient populations and resources may differ. In the United Kingdom (UK), a recent cross-sectional survey found that 85% of paediatric units were using some form of PTTT, most of which were non-specialist centres without a dedicated response team<sup>5</sup>. Despite their widespread use, recent reviews have questioned the evidence-base for their effectiveness in improving patient outcomes<sup>6,7</sup>. The current review aimed to build on this work, assessing in depth the evidence

1  
2  
3 base for both the validity of PTTT for predicting in-patient deterioration and the effectiveness  
4 of broader 'early warning systems' at reducing instances of mortality and morbidity in  
5 paediatric settings:  
6  
7

- 8
- 9 • Question 1: How well validated are existing paediatric track and trigger tools (PTTT)
- 10 and their component parts for predicting in-patient deterioration?
- 11
- 12 • Question 2: How effective are paediatric early warning systems (with or without a
- 13 PTTT) at reducing mortality and critical events?
- 14
- 15
- 16
- 17
- 18
- 19
- 20
- 21
- 22
- 23
- 24
- 25
- 26
- 27
- 28
- 29
- 30
- 31
- 32
- 33
- 34
- 35
- 36
- 37
- 38
- 39
- 40
- 41
- 42
- 43
- 44
- 45
- 46
- 47
- 48
- 49
- 50
- 51
- 52
- 53
- 54
- 55
- 56
- 57
- 58
- 59
- 60

For peer review only

## METHODS

This systematic review is reported in accordance with the Preferred Reporting Items for Systematic Review and Meta-Analyses (PRISMA) guidelines<sup>8</sup>. Our review protocol is registered with the PROSPERO database CRD42015015326.

### Search strategy

A comprehensive search was conducted across a range of databases to identify relevant studies in the English language. Published and unpublished literature was considered where publicly available, as were studies in press. The following databases were searched through May 2018: British Nursing Index, CINAHL (Cumulative Index of Nursing and Allied Health Literature), Cochrane Central Register of Controlled Trials, Database of Abstracts of Reviews of Effectiveness, EMBASE, HMIC (Health Management Information Centre), Medline, Medline in Process, Scopus and Web of Knowledge (Science Citation Indexes). To identify additional papers, published, unpublished or research reported in the grey literature a range of relevant websites and trial registers were searched including Clinical Trials.gov. To identify published papers that had not yet been catalogued in the electronic databases, recent editions of key journals were hand-searched. The search terms included 'early warning scores', 'alert criteria', 'rapid response', 'track and trigger' and 'early medical intervention'. (Supplementary Table 1)

### Eligibility screening and study selection

PICOS parameters guided inclusion criteria for the validation and effectiveness studies (Supplementary Table 2). Papers reporting development of validation of a PTTT were included for Question 1, whereas papers reporting the implementation of any broader 'paediatric early warning system' (with or without a PTTT) were eligible for Question 2. Both research questions were limited to studies that involved in-patients aged 0-18. Outcome measures considered were mortality and critical events, including: unplanned admission to a higher level of care, cardiac arrest, respiratory arrest, medical emergencies requiring immediate assistance, children reviewed by Paediatric Intensive Care Unit (PICU) staff on the ward (in specialist centres) or reviewed by external PICU staff (for non-specialist centres), acuity at PICU admission and PICU outcomes. A range of study designs were considered for both questions.

1  
2  
3 Two of the review authors independently screened the titles and abstracts yielded in the  
4 search. Full texts were reviewed independently by six reviewers against the above eligibility  
5 criteria and were assigned to the relevant review question if included. Reasons for exclusion  
6 were recorded. Separate data extraction forms were developed for validation and  
7 effectiveness studies. The forms had common elements (study design, country, setting, study  
8 population, description of the PTTT or early warning system, statistical techniques used,  
9 outcomes assessed). Additional data items for validation studies included the items in the  
10 PTTT, modifications to the PTTT from previous versions, predictive ability of individual  
11 items and the overall tool, sensitivity and specificity and inter and intra-rater reliability.  
12 Effectiveness studies included an assessment of outcomes in terms of mortality and various  
13 morbidity variables. Data extraction was carried out by two reviewers and discrepancies were  
14 resolved by discussion. For effectiveness studies, effect sizes and 95% confidence intervals  
15 (CI) were calculated or reported as risk ratios (RR) or odds ratios (OR) as appropriate, with  
16 p-values reported to assess statistical significance. Data analysis was conducted using an  
17 online medical statistics tool.

### 28 29 **Quality appraisal**

30  
31 Methodological quality and risk of bias was assessed for each included study using a  
32 modified version of the Downs and Black rating scale<sup>9</sup> (templates shown in Supplementary  
33 Table 3).  
34  
35  
36

### 37 **Patient and Public Involvement**

38  
39 This review was conducted as part of a larger mixed-methods study (ISRCTN94228292),  
40 which used a formal, facilitated parental advisory group. The group comprised parents of  
41 children who had experienced an unexpected adverse event in a paediatric unit and provided  
42 input which helped to shape the broader research questions and outcome measures. The  
43 results of the review will be disseminated to parents through this group.  
44  
45  
46  
47  
48  
49  
50  
51  
52  
53  
54  
55  
56  
57  
58  
59  
60



## REVIEW RESULTS

Figure 1 shows the PRISMA flow diagram for both research questions.

[FIGURE 1]

### Study characteristics

Table 1 summarises the study characteristics of the 36 validation (Question 1) and 30 effectiveness (Question 2) papers included in the review.

| Validation studies (n=36)    |    |      | Effectiveness studies (n=30) |    |      |
|------------------------------|----|------|------------------------------|----|------|
|                              | N  | %    |                              | n  | %    |
| <b>Type</b>                  |    |      | <b>Type</b>                  |    |      |
| Full text                    | 22 | 61.1 | Full text                    | 21 | 70.0 |
| Abstract                     | 14 | 38.9 | Abstract                     | 9  | 30.0 |
|                              |    |      |                              |    |      |
| <b>Country</b>               |    |      | <b>Country</b>               |    |      |
| United States                | 15 | 41.7 | United States                | 18 | 60.0 |
| United Kingdom               | 12 | 33.3 | United Kingdom               | 3  | 10.0 |
| Canada                       | 2  | 5.5  | Canada                       | 2  | 6.7  |
| Australia                    | 0  | 0.0  | Australia                    | 3  | 10.0 |
| Other                        | 5  | 13.9 | Other                        | 3  | 10.0 |
| Multiple                     | 1  | 2.8  | Multiple                     | 1  | 3.3  |
| Unclear                      | 1  | 2.8  | Unclear                      | 0  | 0.0  |
|                              |    |      |                              |    |      |
| <b>Year of study</b>         |    |      | <b>Year of study</b>         |    |      |
| Pre-2012                     | 10 | 27.8 | Pre-2012                     | 15 | 50.0 |
| 2012                         | 3  | 8.3  | 2012                         | 1  | 3.3  |
| 2013                         | 6  | 16.7 | 2013                         | 2  | 6.7  |
| 2014                         | 5  | 13.9 | 2014                         | 6  | 20.0 |
| 2015                         | 7  | 19.4 | 2015                         | 0  | 0.0  |
| 2016                         | 2  | 5.6  | 2016                         | 2  | 6.7  |
| 2017                         | 3  | 8.3  | 2017                         | 1  | 3.3  |
| 2018                         | 0  | 0.0  | 2018                         | 3  | 10.0 |
|                              |    |      |                              |    |      |
| <b>Setting</b>               |    |      | <b>Setting</b>               |    |      |
| Specialist / tertiary        | 33 | 91.7 | Specialist / tertiary        | 29 | 96.7 |
| Non-specialist / community   | 0  | 0.0  | Non-specialist / community   | 1  | 3.3  |
| Unclear                      | 3  | 8.3  | Unclear                      | 0  | 0.0  |
|                              |    |      |                              |    |      |
| <b>Single / multi-centre</b> |    |      | <b>Single / multi-centre</b> |    |      |
| Single-centre                | 35 | 97.2 | Single-centre                | 28 | 93.3 |
| Multi-centre                 | 1  | 2.8  | Multi-centre                 | 2  | 6.7  |
|                              |    |      |                              |    |      |
| <b>Study population</b>      |    |      | <b>Study population</b>      |    |      |
| General in-patients          | 23 | 63.9 | General in-patients          | 20 | 66.6 |
| Specialist population        | 11 | 30.6 | Specialist population        | 5  | 16.7 |
| Unclear                      | 2  | 5.6  | Unclear                      | 5  | 16.7 |
|                              |    |      |                              |    |      |
| <b>Study design</b>          |    |      | <b>Study design</b>          |    |      |
| Case-control                 | 18 | 50.0 | Uncontrolled before-after    | 26 | 86.7 |

|                     |    |      |                          |   |     |
|---------------------|----|------|--------------------------|---|-----|
| Case / chart review | 10 | 27.8 | Controlled before-after  | 1 | 3.3 |
| Cohort              | 7  | 19.4 | Interrupted Time Series  | 2 | 6.7 |
| Pilot study         | 1  | 2.8  | Cluster randomised trial | 1 | 3.3 |

**Table 1: Summary study characteristics of validation and effectiveness papers in the review**

## Types of PTTS and components

Across 66 studies, we identified 27 unique PTTT (Table 2). Twenty PTTTs were based on one of four different tools: Monaghan’s Brighton PEWS<sup>10</sup>, the Bedside PEWS<sup>11</sup>, the Bristol PEWT<sup>12</sup> and the Melbourne Activation Criteria<sup>13</sup>. Other PTTT described in the literature included the National Health Service Institute for Innovation and Improvement (NHS III) PEWS<sup>14</sup> (the second most commonly used PTTT in United Kingdom paediatric settings<sup>5</sup>), RRT and MET activation criteria<sup>15–18</sup>, and one prediction algorithm developed from a large dataset of electronic health data<sup>19</sup>.

[TABLE 2]

Table 2 illustrates the range of physiological and behavioural parameters underpinning PTTT. Common parameters included heart rate (present in 26 out of 27 PTTT), respiratory rate (24), respiratory effort (24) and level of consciousness or behavioural state (24). All PTTT required at least six different parameters to be collected.

## Question 1 – How well validated are PTTT and component parts for predicting in-patient deterioration?

Nine validation papers meeting inclusion criteria were excluded from analysis: eight did not report any performance characteristics of the PTTT for predicting deterioration<sup>20–27</sup> and one study calculated incorrect sensitivity/specificity outcomes<sup>12</sup> (Supplementary Table 4). The remaining 27 validation studies, evaluating the performance of 18 unique PTTT, are described in Table 3. Four studies evaluated multiple PTTTs<sup>3,19,28,29</sup> and one paper described three separate studies of the same PTTT<sup>30</sup>.

[TABLE 3]

Five cohort studies were included<sup>14,31–34</sup>, three based on the same dataset. All other studies were either case-control or chart reviews. Thirteen papers implemented the PTTT in practice<sup>23,30,31,34–43</sup>, while the remaining studies ‘bench tested’ the PTTT – researchers retrospectively calculated the score based on data abstracted from medical charts and records. All studies were conducted in specialist centres with only one multi-centre study reported<sup>44</sup>.

## Outcome measures

PTTT were evaluated for their ability to predict a wide range of clinical outcomes. Composite measures were used in eight studies<sup>14,23,29,32,33,37,45,46</sup>, cardiac/respiratory arrest or a “code call” was used (singularly or part of a composite outcome) in six studies<sup>23,28,29,37,45,47</sup>, while 22 studies used transfer to a PICU or Paediatric High-Dependency Unit (PHDU) as the main outcome<sup>3,11,19,23,28–34,36,37,39,41–44,46,48,49</sup>.

#### *Predictive ability of individual PTTT components*

Three validation papers reported on the performance characteristics of individual components of the tool for predicting adverse outcomes<sup>11,33,42</sup>. Parshuram and colleagues, for instance, reported Area Under the Receiver Operating Characteristic curve (AUROC) values for individual PTTT items of a pilot version of the Bedside PEWS: ranging from 0.54 (bolus fluid) to 0.81 (heart rate), compared to 0.91 for the overall PTTT<sup>11</sup>. All other studies reported outcomes for the PTTT as a whole.

#### *Paediatric Early Warning System (PEWS) score*

The predictive ability of the 16-item PEWS score was assessed by one internal<sup>47</sup> (AUROC=0.90) and two external case-control studies<sup>28,29</sup> (AUROC range =0.82-0.88) with a range of outcome measures and scoring thresholds. One case-control study used an observed prevalence rate to calculate a positive predictive value (PPV) of 4.2% for the tool in predicting code calls<sup>47</sup> (for every 1,000 patients triggering the PTTT, 42 would be expected to deteriorate).

#### *Bedside PEWS and derivatives*

The Bedside PEWS was evaluated in one internal<sup>11</sup> (AUROC=0.91) and five external case-control studies<sup>19,28,29,44,46</sup> (AUROC range=0.73-0.90) for a range of different outcome measures and at different scoring thresholds. One case-control study calculated a PPV of 2.1% for identifying children requiring urgent PICU transfer within 24 hours of admission, based on locally observed prevalence rates<sup>19</sup>. A modified version of the Bedside PEWS (with temperature added) demonstrated an AUROC of 0.86 in an external case-control study with a composite outcome of death, arrest or unplanned PICU transfer<sup>29</sup>.

#### *Brighton PEWS and derivatives*

Six different PTTT based on the original Brighton PEWS were evaluated across 11 studies<sup>19,29,31,37,39–42,45,48,50</sup>. The Modified Brighton PEWS (a) was evaluated for its ability to predict PICU transfers in one large prospective cohort study (AUROC=0.92, PPV=5.8%)<sup>31</sup>,

1  
2  
3 and an external case-control study tested the same score for predicting urgent PICU transfers  
4 within 24 hours of admission (AUROC=0.74, PPV= 2.1%)<sup>19</sup>.

7 An external case-control study used a composite measure of death, arrest or PICU transfer to  
8 evaluate the Modified Brighton PEWS (b) (AUROC=0.79) and the Modified Brighton PEWS  
9 (d) (AUROC=0.74)<sup>29</sup>. The latter tool was evaluated in a further internal case-control study for  
10 predicting PICU transfer (AUROC=0.82) <sup>48</sup>.

14 The Children's Hospital Early Warning Score (CHEWS) had a reported AUROC of 0.90 for  
15 predicting PICU transfers or arrests in a large internal case-control study<sup>50</sup>. A modification  
16 for cardiac patients, the Cardiac CHEWS (C-CHEWS) was evaluated by one internal study  
17 on a cardiac unit<sup>37</sup> (AUROC = 0.90) looking at arrests or unplanned PICU transfers, and two  
18 external studies of oncology / haematology units<sup>41,42</sup> for the same outcome (AUROC=0.95).  
19 Finally, the Children's Hospital Los Angeles (CHLA) PEWS was evaluated by in a small  
20 internal case-control study for prediction of re-admission to PICU after initial PICU  
21 discharge<sup>40</sup> (AUROC=0.71).

#### 28 *Melbourne Activation Criteria (MAC) and derivatives*

31 The MAC was assessed by one external case-control study with an outcome of death, arrest  
32 or unplanned PICU transfer<sup>29</sup> (AUROC=0.71) and a large external cohort study with an  
33 outcome of death or unplanned PICU or HDU transfer<sup>33</sup> (AUROC=0.79, PPV=3.6%). A  
34 derivative of the MAC using an aggregate score, the Cardiff & Vale PEWS (C&VPEWS),  
35 was tested using the same cohort and outcome measures in an earlier external study  
36 (AUROC=0.86, PPV=5.9%)<sup>32</sup> and was the best performing PTTT in an external case-control  
37 study evaluating multiple PTTT<sup>29</sup> (AUROC=0.89).

#### 43 *Bristol PEWT*

46 The Bristol PEWT was evaluated by five external validation studies: two chart review  
47 studies<sup>3,35</sup> (no AUROC), one small cohort study of PICU transfers<sup>34</sup> (AUROC=0.91,  
48 PPV=11%), and two case-control studies looking at code calls<sup>28</sup> (AUROC=0.75) and a  
49 composite of death, arrests and PICU transfers<sup>29</sup> (AUROC=0.62).

#### 53 *Other PTTT*

56 The NHS Institute for Improvement and Innovation (NHS III) PEWS was tested by one  
57 external cohort study looking at a composite of death or unplanned transfers to PICU or  
58 HDU<sup>14</sup> (AUROC=0.88, PPV=4.3%) and one external case-control study looking at a  
59  
60

1  
2  
3 composite of death, arrests and PICU transfers<sup>29</sup> (AUROC=0.82). Zhai and colleagues  
4 developed and retrospectively evaluated a logistic regression algorithm in an internal case-  
5 control study looking at urgent PICU transfers in the first 24 hours of admission<sup>19</sup> (AUROC  
6 =0.91, PPV=4.8%).  
7  
8  
9

10 Across PTTT, studies reporting performance characteristics of a tool at a range of different  
11 scoring thresholds demonstrate the expected interaction and trade-off between sensitivity and  
12 specificity – at lower triggering thresholds, sensitivity is high but specificity is low; at higher  
13 thresholds, the opposite is true.  
14  
15  
16

### 17 *Inter-rater reliability and completeness of data*

18  
19 Accurate assessment of the ability of a PTTT to predict clinical deterioration is contingent on  
20 accuracy and reliability of tool scoring (whether by bedside nurses in practice or by  
21 researchers abstracting data) and the availability of underpinning observations. Only five  
22 papers made reference to accuracy or reliability of scoring<sup>28,31,37,42,45</sup>, with mixed results: for  
23 example, two nurses separately scoring a sub-set of patients on the Modified Brighton PEWS  
24 (a) achieved an intra-class coefficient of 0.92<sup>31</sup>, but a study nurse and bedside nurse achieved  
25 only 67% agreement in scoring the C-CHEWS tool<sup>37</sup>. Completeness of data was reported in  
26 11 studies<sup>11,14,19,29,30,32,33,42,44,45,47</sup>. An evaluation of the Modified Bedside PEWS (a) reported  
27 that “the PEWS was correctly performed and could be used for inclusion in the study” in 59%  
28 of cases<sup>30</sup>, a prospective study bench-testing the C&VPEWS found an average completeness  
29 rate of 44% for the seven different parameters in daily practice<sup>32</sup>, while a multi-centre study  
30 of the Bedside PEWS reported that “only 5.1% [of observation sets] had measurements on all  
31 7 items”<sup>44</sup>.  
32  
33  
34  
35  
36  
37  
38  
39  
40  
41  
42

### 43 **Question 2 – how effective are early warning systems at reducing mortality and critical** 44 **events in hospitalised children?**

45  
46  
47 Eleven papers meeting inclusion criteria were excluded from analysis for providing  
48 insufficient statistical information (e.g., denominator data, absolute numbers of events) to  
49 calculate effect sizes<sup>39,51–59</sup>. Further details on papers excluded from analysis are provided in  
50 Supplementary Table 5. Findings from the 19 studies included in the analysis are summarised  
51 in Table 4.  
52  
53  
54

55 [TABLE 4]

### 56 *Type of early warning system interventions*

1  
2  
3 Seventeen interventions involved the introduction of a new PTTT<sup>13,15-18,60-72</sup>, one  
4 intervention introduced a mandatory triggering element to an existing PTTT<sup>71</sup>, and one study  
5 reported a large, multi-centre analysis of MET introduction with no details on PTTT use<sup>73</sup>.  
6  
7 Twelve interventions included the introduction of a new MET or RRT<sup>13,15-18,60-65,69</sup>, while  
8 four further interventions introduced a new PTTT in a hospital with an existing MET or RRT.  
9  
10 Only three studies therefore evaluated a PTTT in the absence of a dedicated response  
11 team<sup>67,68,70</sup>. A staff education programme was explicitly described in ten  
12  
13 interventions<sup>13,15,17,61,62,64,67,68,70,72</sup>.  
14  
15

16  
17 Of the 18 studies that used a PTTT, only seven used a tool that had been formally evaluated  
18 for validity: three used the Bedside PEWS<sup>64,65,70</sup>, two used the MAC<sup>13,62</sup>, one used the  
19 Modified Brighton PEWS (b)<sup>72</sup> and one used the C-CHEWS<sup>67</sup>. One study did not report the  
20 PTTT used<sup>61</sup>, while ten studies used a variety of calling criteria and local modifications to  
21 validated tools that had not been evaluated for validity<sup>15-18,60,63,66,68,69,71</sup>.  
22  
23

#### 24 25 26 *Mortality (ward or hospital wide)* 27

28  
29 Two uncontrolled before-after studies (both with MET/RRT) reported significant mortality  
30 rate reductions post intervention: one in hospital wide deaths per 100 discharges<sup>17</sup> (RR=0.82,  
31 95% CI=0.70-0.95) and one in total hospital deaths per 1,000 admissions (RR=0.65, 0.57-  
32 0.75) and deaths on the ward ('unexpected deaths') per 1,000 admissions<sup>62</sup> (RR=0.35, 0.13-  
33 0.92). Seven studies found no reductions in mortality, including two high quality multi-centre  
34 studies<sup>13,15,60,63-65,73</sup>. Parshuram and colleagues conducted a cluster randomised trial and  
35 found no difference in all-cause hospital mortality rates between 10 hospitals randomly  
36 selected to receive an intervention centred around use of the Bedside PEWS and 11 usual  
37 care hospitals, one year post intervention (OR=1.01, 0.61-1.69)<sup>64</sup>. Kutty *et al.* assessed the  
38 impact of MET implementation in 38 US paediatric hospitals with an interrupted time series  
39 study, and reported no difference in the slope of hospital mortality rates five years post  
40 intervention and the expected slope based on pre-implementation trends (OR = 0.94, 0.93-  
41 0.95)<sup>73</sup>.  
42  
43

#### 44 45 46 *PICU mortality* 47

48  
49 Two uncontrolled before-after studies (both with MET/RRT) reported a significant post-  
50 intervention reduction in rates of PICU mortality among ward transfers (RR=0.31, 0.13-  
51 0.72)<sup>18</sup>, and PICU mortality rates among patients readmitted within 48 hours (RR=0.43, 0.17-  
52 0.99)<sup>63</sup>. Six studies (including a high quality cluster randomised trial and interrupted time  
53  
54  
55  
56  
57  
58  
59  
60

series study) reported no post-intervention change in PICU mortality using a variety of metrics<sup>64-69</sup>.

### *Cardiac and respiratory arrests*

Two uncontrolled before-after studies (both with RRT/MET) reported significant post-intervention rate reductions in sub-categories of cardiac arrests: one in 'near cardiopulmonary arrests'<sup>63</sup> (RR=0.54, 0.52-0.57) but not 'actual cardiopulmonary arrests' and one in 'preventable cardiac arrests'<sup>62</sup> (RR=0.45, 0.20-0.97) but not 'unexpected cardiac arrests'. One uncontrolled before-after study (with RRT/MET) reported a significant post intervention reduction in rates of ward respiratory arrests per 1,000 patient-days<sup>16</sup> (RR=0.27, 0.07-0.95). Seven studies (including one high quality cluster randomised trial and one high quality interrupted time series study) found no change in cardiac arrest rates using a variety of metrics<sup>13,15,16,61,64,65</sup> or cardiac and respiratory arrests combined<sup>60</sup>.

### *Calls for urgent review / assistance*

Two uncontrolled before-after studies (all with RRT/MET) reported significant post-intervention reductions in rates of code calls<sup>17,63</sup> (RR=0.29, 0.10-0.65; RR=0.71, 0.61-0.83) while three studies found no change in rates of code calls<sup>15,18,72</sup>. One uncontrolled before-after study in a community hospital (without RRT/MET) found significant post intervention reductions in rates of urgent calls to the in-house paediatrician (RR=0.23, 0.11-0.46) and respiratory therapist<sup>70</sup> (RR=0.36, 0.13-0.95). Two uncontrolled before-after studies (with RRT/MET) found increases in rates of RRT calls<sup>72</sup> (RR=1.59, 1.33-1.90) and outreach team calls<sup>66</sup> (RR=1.92, 1.79-2.07). One study found no change in rates of RRT calls<sup>71</sup>.

### *PICU transfers*

One uncontrolled before-after study (without RRT/MET) found a significant post-intervention decrease in the rate of unplanned PICU transfers per 1,000 patient-days<sup>67</sup> (RR=0.70, 0.56-0.88). Four studies (including one high quality cluster randomised trial and one high quality interrupted time series study) found no change in rates of PICU admissions post intervention<sup>64-66,70</sup>.

### *PICU outcomes*

Two studies, one interrupted time series and one multi-centre cluster randomised trial (both with RRT/MET), found significant reductions in rates of 'critical deterioration events' (life-sustaining interventions administered within 12 hours of PICU admission) relative to pre-



1  
2  
3 implementation trends and relative to control hospitals respectively (IRR=0.38, 0.20-0.75;  
4 OR=0.77, 0.61-0.97)<sup>64,65</sup>. One controlled before-after study (without RRT/MET) reported a  
5 significant reduction in rates of invasive ventilation given to emergency PICU admissions  
6 post intervention (RR=0.83, 0.72-0.97) with no significant change observed in a control  
7 group of patients admitted to PICU from outside of the hospital<sup>68</sup>. One uncontrolled before-  
8 after study reported a significant post-intervention decrease in rates of PICU admissions  
9 receiving mechanical ventilation (RR=0.85, 0.73-0.99) but an increase in rates of early  
10 intubation (RR=1.87, 1.33-2.62)<sup>69</sup>.

### 17 *Implementation outcomes*

19 Only three studies reported outcomes relating to the quality of implementation of the  
20 intervention. One study reported 99% of audited observation sets of the Bedside PEWS had  
21 at least 5 vital signs present post-intervention, up from 76% pre-intervention (no change in  
22 control hospitals)<sup>64</sup>. A previous study of the same PTTT reported 3% of audited cases had  
23 used the incorrect age chart but reported an intra-class coefficient of 0.90 for agreement  
24 between bedside nurses scoring the PTTT in practice and research nurses retrospectively  
25 assigned scores<sup>70</sup>. Finally, error rates in C-CHEWS scoring were reported to have reduced  
26 from an initial 47% to below 10% by the end of the study<sup>67</sup>.

## 34 **DISCUSSION**

36 This paper reviewed the published PTTT and early warning system literature in order to  
37 assess the validity of PTTT for predicting in-patient deterioration (Question 1) and the  
38 effectiveness of early warning system interventions (with or without PTTT) for reducing  
39 mortality and morbidity outcomes in hospitalised children (Question 2). We believe that the  
40 consideration of broader 'early warning systems' differentiates this paper from previous  
41 reviews, as does the inclusion of two recently published high-quality effectiveness  
42 studies<sup>64,73</sup>.

### 49 **How well validated are existing tools for predicting in-patient deterioration?**

51 Given a growing understanding and emphasis on the importance of local context in  
52 healthcare interventions, it is perhaps not surprising that such a wide range of PTTT have  
53 been developed and evaluated internationally, and modifications to existing PTTT are  
54 common. The result, however, is that a large number of different PTTT have been narrowly  
55 validated, but none have been broadly validated across a variety of different settings and  
56  
57  
58  
59  
60



1  
2  
3 populations. With only one exception<sup>44</sup>, all studies evaluating the validity of PTTT have been  
4 single-centre reports from specialist units, greatly limiting the generalisability of the findings.  
5  
6 PTTT such as the Bedside PEWS, C&VPEWS, NHS III PEWS and C-CHEWS have  
7 demonstrated very good (AUROC  $\geq 0.80$ ) or excellent (AUROC  $\geq 0.90$ ) diagnostic accuracy,  
8 typically for predicting PICU transfers, in internal and external validation  
9 studies<sup>11,14,19,29,32,37,42,44</sup>. However, methodological issues common to the validation studies  
10 mean that such results need to be interpreted with a degree of caution. Firstly, each of the  
11 studies was conducted in a clinical setting where paediatric in-patients are subject to various  
12 forms of routine clinical intervention throughout their admission. There are numerous  
13 statistical modelling techniques which can account for co-occurrence of clinical interventions  
14 and the longitudinal nature of the predictors<sup>74,75</sup>, but none of these were used in the validation  
15 studies and so estimates of predictive ability are likely to be distorted. Indeed, the majority of  
16 outcomes used in the validation studies are clinical interventions themselves (e.g., PICU  
17 transfer). Secondly, while it is understandable that a majority of studies ‘bench-tested’ the  
18 PTTT rather than implement it into practice before evaluation, the process of abstracting  
19 PTTT scores retrospectively from patient charts and medical records introduces a number of  
20 sources of potential bias or inaccuracy. For instance, several studies reported either high  
21 levels of missing data (i.e., some of the observations required to populate the PTTT score  
22 being evaluated were not routinely collected or recorded and so were scored as  
23 ‘normal’)<sup>11,19,32,44,45</sup> or difficulty in abstracting certain descriptive or subjective PTTT  
24 components<sup>19,28,41,49</sup>. Assuming missing values are normal, or excluding some PTTT items  
25 for analysis are both likely to result in underscoring of the PTTT and skew the results.  
26 Finally, studies which evaluated a PTTT that had been implemented in practice are at risk of  
27 overestimating the ability of PTTT to predict proxy outcomes such as PICU transfer,  
28 inasmuch as high PTTT scores or triggers automatically direct staff towards escalation of  
29 care, or clinical actions which make escalation of care more likely.  
30  
31  
32  
33  
34  
35  
36  
37  
38  
39  
40  
41  
42  
43  
44  
45  
46  
47  
48

49 The findings reported in several PTTT studies point towards two potential challenges for  
50 some centres in implementing and sustaining a PTTT in clinical practice. As noted above, a  
51 number of studies that retrospectively ‘bench-tested’ a PTTT reported that the observations  
52 that were required to score the tool were not always routinely collected or recorded in their  
53 centre. It may be that the introduction of a PTTT into practice would help create a framework  
54 to ensure that core vital signs and observations were collected more routinely (as  
55 demonstrated by Parshuram and colleagues<sup>64</sup>) but this would obviously have resource  
56  
57  
58  
59  
60

1  
2  
3 implications that could be a potential barrier for some centres. Such considerations are  
4 important, as evidence from the adult literature points to the potential for tools to  
5 inadvertently mask deterioration when core observations are missing<sup>76</sup>. Secondly, PPV values  
6 reported in cohort studies, and case-control studies that adjusted for outcome prevalence,  
7 were uniformly low (between 2.3%-5.9%)<sup>14,19,31-33,47</sup>. They demonstrate that even PTTT  
8 which demonstrate good predictive performance are likely to generate a large amount of  
9 'false alarms' because adverse outcomes are so rare. For some centres, these issues may be  
10 mitigated to some extent by dedicated response teams or other available resources, but other  
11 hospitals may not be able to sustain the increased workload of responding to PTTT triggers.

### 12 **How effective are early warning systems for reducing mortality and morbidity?**

13 We found limited evidence for early warning system interventions reducing mortality or  
14 arrest rates in hospitalised children. While some effectiveness papers did report significant  
15 reductions in rates of mortality (on the ward or in PICU) or cardiac arrests after  
16 implementation of different early warning system interventions<sup>16-18,62,63</sup>, they were all  
17 uncontrolled before-after studies which have inherent limitations in terms of establishing  
18 causality. They do not preclude the possibility that outcome rates would have improved over  
19 time regardless of the intervention<sup>77</sup> or changes were caused by other factors, and their  
20 inclusion is accordingly discouraged by some Cochrane review groups<sup>78</sup>. Three high quality  
21 multi-centre studies - two interrupted time series studies and a recent cluster randomised trial  
22 – found no changes in rates or trends of mortality or arrests post intervention<sup>64,65,73</sup>.

23 There was also limited evidence for early warning systems reducing PICU transfers or calls  
24 for urgent review. Again, a small number of uncontrolled before-after studies reported  
25 significant reductions post-intervention<sup>15,17,63</sup>, but several other studies reported significant  
26 increases in transfers or calls for review<sup>66,72</sup> or no post-intervention changes. We did find  
27 moderate evidence across four studies – including a controlled before-after study, a multi-  
28 centre interrupted time series study and a multi-centre cluster randomised trial - for early  
29 warning system interventions reducing rates of early critical interventions in children  
30 transferred to PICU<sup>64,65,68,69</sup>. Such results are promising, but corresponding reductions in  
31 hospital or PICU mortality rates have not yet been reported.

32 Implementing complex interventions in a healthcare setting is challenging and evidence from  
33 the adult literature points to challenges and barriers to successfully implement TTT in  
34 practice<sup>79-81</sup>. However, given so few effectiveness studies reported on implementation  
35 outcomes, it is difficult to know whether negative findings reflect poor effectiveness or  
36

1  
2  
3 implementation of early warning systems. Again, effectiveness studies were predominantly  
4 carried out in specialist centres – and in all but three cases<sup>67,68,70</sup>, involved the use of a  
5 dedicated response team – which greatly limits the generalisability of findings outside of  
6 these contexts.  
7  
8  
9

### 10 *Limitations of the review*

11  
12 There are several limitations of the current review. Firstly, despite purposely widening the  
13 scope of the effectiveness review question to include paediatric ‘early warning systems’ with  
14 or without a PTTT, we identified very few studies that did not employ a PTTT as part of the  
15 intervention . In part, this likely reflects the fact that PTTT have become almost synonymous  
16 with early warning systems, but it is also possible that our search strategy may have missed  
17 some broader early warning system initiatives that were not explicitly labelled as such.  
18 Secondly, our inclusion criteria for study selection were deliberately broad and so resulted in  
19 our including several validation and effectiveness studies that were subsequently excluded  
20 from analysis due to insufficient statistical detail or methodological issues. Thirdly, the scope  
21 of the current review was limited to consideration of quantitative validation and effectiveness  
22 studies. We are mindful of research suggesting that implementing PTTT in practice may  
23 confer secondary benefits including, but not limited to improvements in communication,  
24 teamwork and empowerment of junior staff to call for assistance<sup>82–84</sup>. Finally, we opted not to  
25 conduct a meta-analysis of effectiveness findings due to the heterogeneity of outcome  
26 metrics, interventions and study designs, populations and settings. Given the large sample  
27 sizes required to detect changes in rare adverse events, we believe further work is needed to  
28 harmonise outcome measures used to evaluate early warning system interventions  
29 internationally, in order to facilitate pooling of findings across studies.  
30  
31  
32  
33  
34  
35  
36  
37  
38  
39  
40  
41  
42  
43

### 44 **Conclusion**

45  
46 The PTTT literature is currently characterised by an ‘absence of evidence’ rather than an  
47 ‘evidence of absence’. PTTT seem like a logical tool for helping staff detect and respond to  
48 deteriorating patients, but the existing evidence base is too limited to form clear judgements  
49 of their utility. We would argue that there has been too much confidence placed in the  
50 statistical findings of validation studies of PTTT, given methodological limitations in the  
51 study designs. There is evidence of consistently high false-alarm rates and bench-testing  
52 studies point to many PTTT parameters not being reliably recorded in practice: as such there  
53 is reason for caution in considering the viability of PTTT for all hospitals. Almost all of the  
54  
55  
56  
57  
58  
59  
60

1  
2  
3 early warning systems and PTTT reported in the literature have been developed and  
4 evaluated in specialist centres, typically in units with access to dedicated response teams –  
5 yet PTTT appear to be commonly adopted by non-specialist units with little modification.  
6  
7 There is currently limited evidence that ‘early warning systems’ incorporating a PTTT reduce  
8 deterioration or death in practice. As such, we would urge caution among policymakers in  
9 calling for their use to become mandatory across all hospitals. We acknowledge the potential  
10 for PTTT to confer a range of secondary benefits in areas such as communication, teamwork  
11 and empowerment of junior staff. More work is required to understand the wider impact of  
12 PTTT implementation in different clinical settings before it is possible to evaluate their  
13 overall contribution to the wider safety mechanisms and systems aimed at identifying and  
14 responding to deteriorating in paediatric patients.  
15  
16  
17  
18  
19  
20  
21  
22  
23  
24  
25  
26  
27  
28  
29  
30  
31  
32  
33  
34  
35  
36  
37  
38  
39  
40  
41  
42  
43  
44  
45  
46  
47  
48  
49  
50  
51  
52  
53  
54  
55  
56  
57  
58  
59  
60

## FOOTNOTES

### Contributors

RT: screening and review of papers, contribution to design of work, preparation of manuscript; CH: screening and review of papers, contribution to concept and design of work, review of manuscript; FL: contribution to design of work, screening and review of papers, review of manuscript; KH: contribution to concept and design of work, screening and review of papers, review of manuscript; CP, DR, BM, AO, DE, RS, GS, DL, LT, DA, AL, ETJ: contribution to concept and design of work, screening and review of papers, review of manuscript; MM: information specialist, review of manuscript.

### Acknowledgements

We would like to acknowledge the contribution of Dr James Bunn to the review.

### Competing interests

None declared.

### Funding

This study is funded by the National Institute for Health Research (NIHR) Health Services and Delivery Research (HS&DR) programme (12/178/17).

### Data sharing statement

No additional data are available.

1  
2  
3  
4  
5  
6  
7  
8  
9  
10  
11  
12  
13  
14  
15  
16  
17  
18  
19  
20  
21  
22  
23  
24  
25  
26  
27  
28  
29  
30  
31  
32  
33  
34  
35  
36  
37  
38  
39  
40  
41  
42  
43  
44  
45  
46  
47  
48  
49  
50  
51  
52  
53  
54  
55  
56  
57  
58  
59  
60

**FIGURE LEGENDS**

**Figure 1 – PRISMA flow diagram of study inclusion**

For peer review only

## REFERENCES

- 1 Pearson G a (Ed). Why Children Die: A Pilot Study 2006; England (South West, North East and West Midlands), Wales and Northern Ireland. 2008. doi:ISBN: 978-0-9558055-0-9
- 2 Joint Commission. 2009 National Patient Safety Goals, Requirements and Rationales. *Jt Comm Perspect Patient Saf* 2009;**8**:8–12.
- 3 Tume L. The deterioration of children in ward areas in a specialist children's hospital. *Nurs Crit Care* 2007;**12**:12–9. doi:10.1111/j.1478-5153.2006.00195.x
- 4 NICE. Acutely ill patients in hospital: Recognition of and response to acute illness in adults in hospital. *NICE Clin Guidel 50* 2007;:1–107. doi:10.1136/bmj.39272.679688.47
- 5 Roland D, Oliver A, Edwards ED, *et al*. Use of paediatric early warning systems in Great Britain: has there been a change of practice in the last 7 years? *Arch Dis Child* 2014;**99**:26–9. doi:10.1136/archdischild-2012-302783
- 6 Chapman SM, Wray J, Oulton K, *et al*. Systematic review of paediatric track and trigger systems for hospitalised children. *Resuscitation*. 2016;**109**:87–109. doi:10.1016/j.resuscitation.2016.07.230
- 7 Lambert V, Matthews A, MacDonell R, *et al*. Paediatric early warning systems for detecting and responding to clinical deterioration in children: a systematic review. *BMJ Open* 2017;**7**:e014497. doi:10.1136/bmjopen-2016-014497
- 8 Moher D, Liberati A, Tetzlaff J, *et al*. Preferred reporting items for systematic reviews and meta-analyses: the PRISMA statement. *BMJ* 2009;**339**. doi:10.1136/bmj.b2535
- 9 Downs SH, Black N. The feasibility of creating a checklist for the assessment of the methodological quality both of randomised and non-randomised studies of health care interventions. *J Epidemiol Community Health* 1998;**52**:377–84. doi:10.1136/jech.52.6.377
- 10 Monaghan A. Detecting and managing deterioration in children. *Paediatr Nurs* 2005;**17**:32–5. doi:10.7748/paed2005.02.17.1.32.c964
- 11 Parshuram CS, Hutchison J, Middaugh K. Development and initial validation of the Bedside Paediatric Early Warning System score. *Crit Care* 2009;**13**:R135–R135. doi:10.1186/cc7998
- 12 Haines C, Perrott M, Weir P. Promoting care for acutely ill children - Development and evaluation of a Paediatric Early Warning Tool. *Intensive Crit Care Nurs* 2006;**22**:73–81. doi:10.1016/j.iccn.2005.09.003
- 13 Tibballs J, Kinney S, Duke T, *et al*. Reduction of paediatric in-patient cardiac arrest and death with a medical emergency team: preliminary results. *Arch Dis Child* 2005;**90**:1148–52. doi:10.1136/adc.2004.069401
- 14 Mason BW, Edwards ED, Oliver A, *et al*. Cohort study to test the predictability of the NHS Institute for Innovation and Improvement Paediatric Early Warning System. *Arch Dis Child* 2016;:archdischild – 2015–308465. doi:10.1136/archdischild-2015-308465
- 15 Brill R, Gibson R, Luria JW, *et al*. Implementation of a medical emergency team in a large pediatric teaching hospital prevents respiratory and cardiopulmonary arrests outside the intensive care unit. *Pediatr. Crit. Care Med.* 2007;**8**:236–46.



- 1  
2  
3 doi:10.1097/01.PCC.0000262947.72442.EA  
4  
5 16 Hunt EA, Zimmer KP, Rinke ML, *et al.* Transition from a traditional code team to a  
6 medical emergency team and categorization of cardiopulmonary arrests in a children's  
7 center. *Arch Pediatr Adolesc Med* 2008;**162**:117–22.  
8 doi:10.1001/archpediatrics.2007.33  
9  
10 17 Sharek PJ, Parast LM, Leong K, *et al.* Effect of a rapid response team on hospital-wide  
11 mortality and code rates outside the ICU in a Children's Hospital. *JAMA*  
12 2007;**298**:2267–74. doi:10.1097/01.SA.0000307935.42104.ee  
13  
14 18 Anwar-Ul-Haque, Saleem AF, Zaidi S, *et al.* Experience of pediatric rapid response  
15 team in a tertiary care hospital in Pakistan. *Indian J Pediatr* 2010;**77**:273–6.  
16 doi:10.1007/s12098-010-0032-2  
17  
18 19 Zhai H, Brady P, Li Q, *et al.* Developing and evaluating a machine learning based  
19 algorithm to predict the need of pediatric intensive care unit transfer for newly  
20 hospitalized children. *Resuscitation* 2014;**85**:1065–71.  
21 doi:10.1016/j.resuscitation.2014.04.009  
22  
23 20 Garlick J, Furlong-Dillard J, Alexander M, *et al.* Modified pediatric early warning  
24 scores, a predictor of appropriate transfer to higher level of care. *Crit Care Med*  
25 2013;**41**:A166–7. doi:http://dx.doi.org/10.1097/01.ccm.0000439917.60065.34  
26  
27 21 Medar S, Weingarten-Arams J, Katyal C. Pediatric early warning score (PEWS) is a  
28 reliable predictor of rapid response team (RRT) call. *Crit Care Med* 2015;**43**:228.  
29 doi:http://dx.doi.org/10.1097/01.ccm.0000474735.10884.b3  
30  
31 22 Bell D, Mac A, Ochoa Y, *et al.* The texas children's hospital pediatric advanced  
32 warning score as a predictor of clinical deterioration in hospitalized infants and  
33 children: A modification of the pews tool. *J Pediatr Nurs* 2013;**28**.  
34 doi:10.1016/j.pedn.2013.04.005  
35  
36 23 McLellan MC, Connor JA. The Cardiac Children's Hospital Early Warning Score (C-  
37 CHEWS). *J Pediatr Nurs* 2013;**28**:171–8. doi:10.1016/j.pedn.2012.07.009  
38  
39 24 Rahman ZH, Leahy NE, Sessler K, *et al.* Application of the burn center Pediatric Early  
40 Warning Score (PEWS) tool to clinical practice: A pilot validation study. *J Burn Care*  
41 *Res* 2014;**35**:S187. doi:http://dx.doi.org/10.1097/01.bcr.0000445189.61189.9d  
42  
43 25 Hopkins M, Rowan C, Rigby M, *et al.* PEWS score predicts the need for PICU transfer  
44 and critical care interventions. *Crit Care Med* 2013;**Conference**:43rd Critical Care  
45 Congress of the Society of Crit.  
46 doi:http://dx.doi.org/10.1097/01.ccm.0000439922.90559.23  
47  
48 26 Gawronski O, Bertaina A, Broccati F, *et al.* Bedside pews in an Italian pediatric bone  
49 marrow transplant unit: Preliminary results of a longitudinal retrospective chart  
50 review. *Intensive Care Med* 2013;**39**:S130. doi:http://dx.doi.org/10.1007/s00134-013-  
51 2950-8  
52  
53 27 Sefton G, Lane S, Carrol ED. Performance of individual predictors of deterioration  
54 used in a paediatric early warning score. *Pediatr Crit Care Med* 2014;**15**:29–30.  
55 doi:http://dx.doi.org/10.1097/01.pcc.0000448835.89804.43  
56  
57 28 Robson M-AJ, Cooper CL, Medicus L a, *et al.* Comparison of three acute care  
58 pediatric early warning scoring tools. *J Pediatr Nurs* 2013;**28**:e33–41.  
59 doi:10.1016/j.pedn.2012.12.002  
60  
29 Chapman SM, Wray J, Oulton K, *et al.* 'The Score Matters': wide variations in



- 1  
2  
3 predictive performance of 18 paediatric track and trigger systems. *Arch Dis Child*  
4 2017;:archdischild – 2016–311088. doi:10.1136/archdischild-2016-311088  
5
- 6 30 Fuijkschot J, Vernhout B, Lemson J, *et al.* Validation of a paediatric early warning  
7 score: First results and implications of usage. *Eur J Pediatr* 2015;**174**:15–21.  
8 doi:10.1007/s00431-014-2357-8  
9
- 10 31 Tucker KM, Brewer TL, Baker RB, *et al.* Prospective evaluation of a pediatric  
11 inpatient early warning scoring system. *J Spec Pediatr Nurs* 2009;**14**:79–85.  
12 doi:10.1111/j.1744-6155.2008.00178.x  
13
- 14 32 Edwards ED, Powell C V, Mason BW, *et al.* Prospective cohort study to test the  
15 predictability of the Cardiff and Vale paediatric early warning system. *Arch Dis Child*  
16 2009;**94**:602–6. doi:10.1136/adc.2008.142026  
17
- 18 33 Edwards ED, Mason BW, Oliver A, *et al.* Cohort study to test the predictability of the  
19 Melbourne criteria for activation of the medical emergency team. *Arch Dis Child*  
20 2011;**96**:174–9. doi:10.1136/adc.2010.187617  
21
- 22 34 O’Loughlin K, Ruparelia K, Vince T, *et al.* The effectiveness of the paediatric early  
23 warning tool (PEWT) in identifying children requiring admission to a critical care unit.  
24 *Arch Dis Child* 2012;**97**:A154. doi:http://dx.doi.org/10.1136/archdischild-2012-  
25 301885.362  
26
- 27 35 Wright D, Sefton G, Horan M. Charted observations and the use of a paediatric early  
28 warning tool did not predict the majority of cardio-respiratory arrest calls in a  
29 paediatric hospital. *Arch Dis Child* 2011;**96**:A59.  
30 doi:http://dx.doi.org/10.1136/adc.2011.212563.134  
31
- 32 36 Ahmed M, Sobithadevi D, Lall R, *et al.* Burton paediatric early warning system score.  
33 *Arch Dis Child* 2012;**97**:A421. doi:http://dx.doi.org/10.1136/archdischild-2012-  
34 302724.1483  
35
- 36 37 Mclellan MC, Gauvreau K, Connor JA. Validation of the cardiac children’s hospital  
37 early warning score: An early warning scoring tool to prevent cardiopulmonary arrests  
38 in children with heart disease. *Congenit Heart Dis* 2014;**9**:194–202.  
39 doi:10.1111/chd.12132  
40
- 41 38 Clayson R, Selby A, Tume L. Is a paediatric early warning tool (PEWT) useful in  
42 cardiac patients? *Pediatr Crit Care Med* 2014;**15**:35–6.  
43 doi:http://dx.doi.org/10.1097/01.pcc.0000448865.31975.d1  
44
- 45 39 Fenix JB, Gillespie CW, Levin A, *et al.* Comparison of Pediatric Early Warning Score  
46 to Physician Opinion for Deteriorating Patients. *Hosp Pediatr* 2015;**5**:474–9.  
47 doi:10.1542/hpeds.2014-0199  
48
- 49 40 Mandell IM, Bynum F, Marshall L, *et al.* Pediatric Early Warning Score and  
50 unplanned readmission to the pediatric intensive care unit. *J Crit Care* 2015;**30**:1090–  
51 5. doi:10.1016/j.jcrc.2015.06.019  
52
- 53 41 Agulnik A, Forbes PW, Stenguist N, *et al.* Validation of a Pediatric Early Warning  
54 Score in Hospitalized Pediatric Oncology and Hematopoietic Stem Cell Transplant  
55 Patients. *Pediatr Crit Care Med* 2016;**17**:e146–53.  
56 doi:http://dx.doi.org/10.1097/PCC.0000000000000662  
57
- 58 42 Agulnik A, Mendez Aceituno A, Mora Robles LN, *et al.* Validation of a pediatric early  
59 warning system for hospitalized pediatric oncology patients in a resource-limited  
60 setting. *Cancer* 2017;**123**:4903–13. doi:10.1002/cncr.30951

- 1  
2  
3 43 Blackstone B, Sharmila A, Pienaar A, *et al.* G453(P) 'Between the flags' paediatric  
4 early warning system is a sensitive tool to detect deterioration in children from district  
5 general hospitals admitted to paediatric intensive care. *Arch Dis Child* 2017;**102**:A178  
6 LP – A179. [http://adc.bmj.com/content/102/Suppl\\_1/A178.2.abstract](http://adc.bmj.com/content/102/Suppl_1/A178.2.abstract)  
7
- 8 44 Parshuram CS, Duncan HP, Joffe AR, *et al.* Multicentre validation of the bedside  
9 paediatric early warning system score: a severity of illness score to detect evolving  
10 critical illness in hospitalised children. *Crit Care* 2011;**15**:R184. doi:10.1186/cc10337  
11
- 12 45 Akre M, Finkelstein M, Erickson M, *et al.* Sensitivity of the pediatric early warning  
13 score to identify patient deterioration. *Pediatrics* 2010;**125**:e763–9.  
14 doi:10.1542/peds.2009-0338  
15
- 16 46 Gawronski O, Ciofi Degli Atti ML, Di Ciommo V, *et al.* Accuracy of Bedside  
17 Paediatric Early Warning System (BedsidePEWS) in a Pediatric Stem Cell Transplant  
18 Unit. *J Pediatr Oncol Nurs* 2016;**33**:249–56. doi:10.1177/1043454215600154  
19
- 20 47 Duncan H, Hutchison J, Parshuram CS. The pediatric early warning system score: A  
21 severity of illness score to predict urgent medical need in hospitalized children. *J Crit*  
22 *Care* 2006;**21**:271–8. doi:10.1016/j.jcrc.2006.06.007  
23
- 24 48 Skaletzky SM, Raszynski A, Totapally BR. Validation of a modified pediatric early  
25 warning system score: a retrospective case-control study. *Clin Pediatr (Phila)*  
26 2012;**51**:431–5. doi:10.1177/0009922811430342  
27
- 28 49 Ross C, Harrysson I, Goel V, *et al.* Sensitivity and specificity of a pediatric early  
29 warning system using data-driven vital signs. *Crit Care Med* 2015;**43**:39.  
30 doi:<http://dx.doi.org/10.1097/01.ccm.0000473979.19857.a8>  
31
- 32 50 McLellan M, Gauvreau K, Connor JA. Validation of the children's hospital early  
33 warning scoring system for identifying hospitalized children at risk for arrest or ICU  
34 transfer. *Pediatr Crit Care Med* 2014;**15**:30.  
35 doi:<http://dx.doi.org/10.1097/01.pcc.0000448836.27923.e3>  
36
- 37 51 Mistry KP, Turi J, Hueckel R, *et al.* Pediatric Rapid Response Teams in the Academic  
38 Medical Center. *Clin Pediatr Emerg Med* 2006;**7**:241–7.  
39 doi:10.1016/j.cpem.2006.08.010  
40
- 41 52 Demmel KM, Williams L, Flesch L. Implementation of the pediatric early warning  
42 scoring system on a pediatric hematology/oncology unit. *J Pediatr Oncol Nurs*  
43 2010;**27**:229–40. doi:10.1177/1043454209358410  
44
- 45 53 Sandhu S, Ralph T, Bradbury K, *et al.* 726 The Paediatric Early Warning Tool in  
46 Combination with a Nurse-Led Outreach Team: Impact on Outcomes for Critically Ill  
47 Children. *Pediatr Res* 2010;**68**:368. [http://dx.doi.org/10.1203/00006450-201011001-](http://dx.doi.org/10.1203/00006450-201011001-00726)  
48 [00726](http://dx.doi.org/10.1203/00006450-201011001-00726)  
49
- 50 54 Randhawa S, Roberts-Turner R, Woronick K, *et al.* Implementing and Sustaining  
51 Evidence-Based Nursing Practice to Reduce Pediatric Cardiopulmonary Arrest. *West J*  
52 *Nurs Res* 2010;**33**:443–56. doi:10.1177/0193945910379585  
53
- 54 55 Camacho EA, Holman D, Badgett V, *et al.* Modification of a Pediatric Early Warning  
55 Tool for Use With Patients in a Specialized Cardiac/Renal Unit. *J Pediatr Nurs*  
56 2011;**26**:e2–3. doi:<http://dx.doi.org/10.1016/j.pedn.2010.12.021>  
57
- 58 56 Heyden M V, Mudge B, Casella S. Initiation of a dedicated pediatric rapid response  
59 team reduces cardiopulmonary arrests outside of the intensive care unit in a small  
60 children's hospital. *Crit Care Med* 2012;**40**:147.

- 1  
2  
3 doi:<http://dx.doi.org/10.1097/01.ccm.0000425605.04623.4b>  
4  
5 57 Norville R, Wills-Bagnato P, Staton S, *et al.* Improvement in early recognition of  
6 deteriorating pediatric bone marrow transplant patients. *Biol Blood Marrow Transplant*  
7 2013;**19**:S173. doi:<http://dx.doi.org/10.1016/j.bbmt.2012.11.152>  
8  
9 58 Ambati SR, Sweberg T, Silver P, *et al.* Effect of simulation based curriculum on the  
10 utilization of rapid response team activations (RRT). *Crit Care Med* 2014;**42**:A1432.  
11 doi:<http://dx.doi.org/10.1097/01.ccm.0000457794.10321.00>  
12  
13 59 Ocholi T, Downing E, Rzeskiewicz A, *et al.* Impact of the Bedside PEWS on early  
14 detection of deteriorating patients. *Arch Dis Child* 2014;**99**:A89–90.  
15 doi:<http://dx.doi.org/10.1136/archdischild-2014-306237.207>  
16  
17 60 Zenker P, Schlesinger A, Hauck M, *et al.* Implementation and impact of a rapid  
18 response team in a children's hospital. *Jt Comm J Qual Patient Saf* 2007;**33**:418–25.  
19 doi:10.1016/S1553-7250(07)33048-1  
20  
21 61 Hanson CC, Randolph GD, Erickson JA, *et al.* A reduction in cardiac arrests and  
22 duration of clinical instability after implementation of a paediatric rapid response  
23 system. *Postgrad Med J* 2010;**86**:314–8. doi:10.1136/qshc.2007.026054  
24  
25 62 Tibballs J, Kinney S. Reduction of hospital mortality and of preventable cardiac arrest  
26 and death on introduction of a pediatric medical emergency team. *Pediatr Crit Care*  
27 *Med* 2009;**10**:306–12. doi:10.1097/PCC.0b013e318198b02c  
28  
29 63 Kotsakis A, Lobos A-T, Parshuram C, *et al.* Implementation of a multicenter rapid  
30 response system in pediatric academic hospitals is effective. *Pediatrics* 2011;**128**:72–  
31 8. doi:10.1542/peds.2010-0756  
32  
33 64 Parshuram CS, Dryden-Palmer K, Farrell C, *et al.* Effect of a pediatric early warning  
34 system on all-cause mortality in hospitalized pediatric patients: The epoch randomized  
35 clinical trial. *JAMA* 2018;**319**:1002–12.  
36  
37 65 Bonafide CP, Localio AR, Roberts KE, *et al.* Impact of Rapid Response System  
38 Implementation on Critical Deterioration Events in Children. *JAMA Pediatr*  
39 2014;**168**:25. doi:10.1001/jamapediatrics.2013.3266  
40  
41 66 Duns N, Ceely B, Festa M, *et al.* Introduction of a track and trigger system is  
42 associated with increased paediatric intensive care outreach utilisation and a trend  
43 towards improved patient outcomes in a tertiary children's hospital. *Aust Crit Care*  
44 2014;**27**:61. doi:<http://dx.doi.org/10.1016/j.aucc.2013.10.058>  
45  
46 67 Agulnik A, Mora Robles LN, Forbes PW, *et al.* Improved outcomes after successful  
47 implementation of a pediatric early warning system (PEWS) in a resource-limited  
48 pediatric oncology hospital. *Cancer* 2017;**123**:2965–74. doi:10.1002/cncr.30664  
49  
50 68 Sefton G, McGrath C, Tume L, *et al.* What impact did a Paediatric Early Warning  
51 system have on emergency admissions to the paediatric intensive care unit? An  
52 observational cohort study. *Intensive Crit care Nurs* 2015;**31**:91–9.  
53 doi:10.1016/j.iccn.2014.01.001  
54  
55 69 Kolovos NS, Gill J, Michelson PH, *et al.* Reduction in Mortality Following Pediatric  
56 Rapid Response Team Implementation. *Pediatr Crit Care Med* 2018;**1**.  
57 doi:10.1097/PCC.0000000000001519  
58  
59 70 Parshuram CS, Bayliss A, Reimer J, *et al.* Implementing the Bedside Paediatric Early  
60 Warning System in a community hospital: A prospective observational study. *Paediatr*  
*Child Health* 2011;**16**:e18–

22. <http://www.pubmedcentral.nih.gov/articlerender.fcgi?artid=3077313&tool=pmcentrez&rendertype=abstract>
- 71 Panesar R, Polikoff LA, Harris D, *et al.* Characteristics and outcomes of pediatric rapid response teams before and after mandatory triggering by an elevated Pediatric Early Warning System (PEWS) score. *Hosp Pediatr* 2014;**4**:135–40. doi:10.1542/hpeds.2013-0062
- 72 Douglas K, Collado JC, Keller S. Implementation of a Pediatric Early Warning Scoring System at an Academic Medical Center. *Crit Care Nurs Q* 2016;**39**:363–70. doi:10.1097/CNQ.0000000000000130
- 73 Kutty S, Jones PG, Karels Q, *et al.* Association of Pediatric Medical Emergency Teams With Hospital Mortality. *Circulation* 2018;**137**:38–46. doi:10.1161/CIRCULATIONAHA.117.029535
- 74 Guerra MW, Shults J, Amsterdam J, *et al.* The analysis of binary longitudinal data with time-dependent covariates. *Stat Med* 2012;**31**:931–48. doi:10.1002/sim.4465
- 75 Selig JP, Preacher KJ, Little TD. Modeling Time-Dependent Association in Longitudinal Data: A Lag as Moderator Approach. *Multivariate Behav Res* 2012;**47**:697–716. doi:10.1080/00273171.2012.715557
- 76 Clifton DA, Clifton L, Sandu D-M, *et al.* ‘Errors’ and omissions in paper-based early warning scores: the association with changes in vital signs—a database analysis. *BMJ Open* 2015;**5**:e007376. doi:10.1136/bmjopen-2014-007376
- 77 Joffe AR, Anton NR, Burkholder SC. Reduction in hospital mortality over time in a hospital without a pediatric medical emergency team: limitations of before-and-after study designs. *Arch Pediatr Adolesc Med* 2011;**165**:419–23. doi:10.1001/archpediatrics.2011.47
- 78 Goodacre S. Uncontrolled before-after studies: Discouraged by Cochrane and the EMJ. *Emerg Med J* 2015;**32**:507–8. doi:10.1136/emered-2015-204761
- 79 Niegsch M, Fabritius ML, Anhoj J. Imperfect Implementation of an Early Warning Scoring System in a Danish Teaching Hospital: A Cross-Sectional Study. *PLoS One* 2013;**8**. doi:10.1371/journal.pone.0070068
- 80 Hands C, Reid E, Meredith P, *et al.* Patterns in the recording of vital signs and early warning scores: Compliance with a clinical escalation protocol. *BMJ Qual Saf* 2013;**22**:719–26. doi:http://dx.doi.org/10.1136/bmjqs-2013-001954
- 81 Lydon S, Byrne D, Offiah G, *et al.* A mixed-methods investigation of health professionals’ perceptions of a physiological track and trigger system. *BMJ Qual* 2015;**688–95**. doi:10.1136/bmjqs-2015-004261
- 82 Bonafide CP, Roberts KE, Weirich CM, *et al.* Beyond statistical prediction: Qualitative evaluation of the mechanisms by which pediatric early warning scores impact patient safety. *J Hosp Med* 2013;**8**:248–53. doi:10.1002/jhm.2026
- 83 Ennis L. Paediatric early warning scores on a children’s ward: a quality improvement initiative. *Nurs Child Young People* 2014;**26**:25–31. doi:10.7748/ncyp.26.7.25.e478
- 84 Kaul M, Snethen J, Kelber ST, *et al.* Implementation of the Bedside Paediatric Early Warning System (BedsidePEWS) for nurse identification of deteriorating patients. *J Spec Pediatr Nurs* 2014;**19**:339–49. doi:10.1111/jspn.12092

**Table 2– summary of PTTTs**

| PTTT name (references)                                                                    | Development / modification details                                                                                                                                                                                                                               | Score / trigger | Choice of thresholds / parameters | Age-dependent thresholds? | No. of items in the tool* | PTTT parameters  |            |                               |                 |                   |                       |                |                         |      |               |             |                 |             |                                                                                                                                                                                                                          | Other items |
|-------------------------------------------------------------------------------------------|------------------------------------------------------------------------------------------------------------------------------------------------------------------------------------------------------------------------------------------------------------------|-----------------|-----------------------------------|---------------------------|---------------------------|------------------|------------|-------------------------------|-----------------|-------------------|-----------------------|----------------|-------------------------|------|---------------|-------------|-----------------|-------------|--------------------------------------------------------------------------------------------------------------------------------------------------------------------------------------------------------------------------|-------------|
|                                                                                           |                                                                                                                                                                                                                                                                  |                 |                                   |                           |                           | Respiratory rate | Heart rate | Respiratory effort / distress | LOC / behaviour | Oxygen saturation | Capillary refill time | Oxygen therapy | Systolic blood pressure | Pain | Staff concern | Skin colour | Airway problems | Temperature | Pulses                                                                                                                                                                                                                   |             |
| <i>Paediatric Early Warning System score and derivatives</i>                              |                                                                                                                                                                                                                                                                  |                 |                                   |                           |                           |                  |            |                               |                 |                   |                       |                |                         |      |               |             |                 |             |                                                                                                                                                                                                                          |             |
| Paediatric Early Warning System (PEWS) score <sup>28,47</sup>                             | Developed for use in Canadian tertiary centre <sup>47</sup> . Nurse-generated candidate items reduced by focus groups/Delphi and evaluation with clinical dataset (code blue calls, n=87; controls, n=128). Development and validation datasets not independent. | Score           | Expert opinion                    | Yes                       | 16                        | ✓                | ✓          | ✓                             | ✓               | ✓                 | ✓                     | ✓              |                         |      |               | ✓           | ✓               | ✓           | Bolus fluid, medications, home oxygen, any previous admission to an ICU, central venous line in situ, transplant recipient, severe cerebral palsy, gastrostomy tube, greater than 3 medical specialties involved in care |             |
| Bedside Paediatric Early Warning Score (PEWS) <sup>11,19,25,26,28,44,46,59,64,65,70</sup> | Developed for use in US tertiary centre <sup>11</sup> . Routinely collected items assessed for discriminatory ability using clinical dataset (PICU admission, n=60; controls, n=120). Development and validation set not independent.                            | Score           | Expert opinion                    | Yes                       | 7                         | ✓                | ✓          | ✓                             | ✓               | ✓                 | ✓                     | ✓              |                         |      |               |             |                 |             |                                                                                                                                                                                                                          |             |
| Modified Bedside PEWS (a) <sup>30</sup>                                                   | Modification to Bedside PEWS for use in Dutch tertiary centre. Added temperature; modified wording of respiratory effort and oxygen therapy items.                                                                                                               | Score           | Expert opinion                    | Yes                       | 8                         | ✓                | ✓          | ✓                             | ✓               | ✓                 | ✓                     | ✓              |                         |      |               | ✓           |                 |             |                                                                                                                                                                                                                          |             |
| Modified Bedside PEWS (b) <sup>49</sup>                                                   | Modification to Bedside PEWS for use in US tertiary centre. Changed normal thresholds for HR and RR based on analysis of local clinical data.                                                                                                                    | Score           | HR / RR data driven               | Yes                       | 7                         | ✓                | ✓          | ✓                             | ✓               | ✓                 | ✓                     | ✓              |                         |      |               |             |                 |             |                                                                                                                                                                                                                          |             |
| <i>Brighton PEWS and derivatives</i>                                                      |                                                                                                                                                                                                                                                                  |                 |                                   |                           |                           |                  |            |                               |                 |                   |                       |                |                         |      |               |             |                 |             |                                                                                                                                                                                                                          |             |
| Brighton PEWS <sup>10,54</sup>                                                            | Initial development for use in UK tertiary centre. Adapted from existing adult scores, but amended based on                                                                                                                                                      | Score           | Expert opinion                    | No                        | 5                         | ✓                | ✓          | ✓                             | ✓               | ✓                 | ✓                     |                |                         |      | ✓             |             |                 |             | ¼ hourly nebulisers, persistent vomiting post-surgery                                                                                                                                                                    |             |







|                                                          |                                                                                |                                                                                                                                                                                                                                                                                         |         |                     |         |    |   |   |   |   |   |   |   |   |   |   |   |   |   |                                                                                                                                 |                                                                                                                        |
|----------------------------------------------------------|--------------------------------------------------------------------------------|-----------------------------------------------------------------------------------------------------------------------------------------------------------------------------------------------------------------------------------------------------------------------------------------|---------|---------------------|---------|----|---|---|---|---|---|---|---|---|---|---|---|---|---|---------------------------------------------------------------------------------------------------------------------------------|------------------------------------------------------------------------------------------------------------------------|
| 1<br>2<br>3<br>4<br>5<br>6<br>7<br>8<br>9                | Bristol Paediatric Early Warning Tool (PEWT)<br>3,12,28,34,35                  | Initial development for use in a UK tertiary centre. Initial candidate items drawn from un-validated Plymouth tool – retrospectively evaluated for ability to predict adverse events among cases (n=360, HDU or PICU transfers). Development and validation dataset not independent.    | Trigger | APLS values         | Yes     | 14 | ✓ | ✓ | ✓ | ✓ | ✓ | ✓ | ✓ | ✓ | ✓ | ✓ | ✓ | ✓ | ✓ | Required nebulised adrenaline; hyperkalaemia; suspected meningococcus; diabetic ketoacidosis; persistent convulsion             |                                                                                                                        |
| 10<br>11<br>12<br>13<br>14<br>15<br>16                   | Modified Bristol PEWT (a) <sup>68</sup>                                        | Modification of Bristol PEWT for a UK tertiary centre. Adjusted wording of Airway parameters; added respiratory items; added AVPU evaluation; removed suspected meningococcus and diabetic ketoacidosis; added pH<7.2 and unresolved pain. No formal validation study reported.         | Trigger | APLS values         | Yes     | 14 | ✓ | ✓ | ✓ | ✓ | ✓ | ✓ | ✓ | ✓ | ✓ | ✓ | ✓ | ✓ | ✓ | Required nebulised adrenaline or no improvement after nebulisers; pH<7.2; unresolved pain or current analgesic therapy; fitting |                                                                                                                        |
| 17<br>18<br>19<br>20<br>21<br>22<br>23                   | Modified Bristol PEWT (b) <sup>38</sup>                                        | Modification of Bristol PEWT for cardiac ward of a UK tertiary centre. Amended HR and RR thresholds. Adjusted wording of Airway parameters; added respiratory items; added AVPU evaluation; removed suspected meningococcus and diabetic ketoacidosis; added pH<7.2 and unresolved pain | Trigger | HR / RR data driven | Yes     | 14 | ✓ | ✓ | ✓ | ✓ | ✓ | ✓ | ✓ | ✓ | ✓ | ✓ | ✓ | ✓ | ✓ | Required nebulised adrenaline or no improvement after nebulisers; pH<7.2; unresolved pain or current analgesic therapy; fitting |                                                                                                                        |
| 24                                                       | <i>Other PTTT</i>                                                              |                                                                                                                                                                                                                                                                                         |         |                     |         |    |   |   |   |   |   |   |   |   |   |   |   |   |   |                                                                                                                                 |                                                                                                                        |
| 25<br>26<br>27<br>28<br>29                               | NHS Institute for Innovation and Improvement (NHS III) PEWS <sup>14</sup>      | Designed as part of a NHS Institute fellowship project. Adapted from adult scores and Brighton PEWS. No formal development or internal validation study published.                                                                                                                      | Score   | APLS values         | Yes     | 6  | ✓ | ✓ | ✓ | ✓ | ✓ | ✓ | ✓ | ✓ | ✓ | ✓ | ✓ | ✓ | ✓ |                                                                                                                                 |                                                                                                                        |
| 30<br>31<br>32<br>33<br>34<br>35<br>36                   | Paediatric Medical Emergency Team (PMET) triggering criteria (a) <sup>15</sup> | Initial development for use in a US tertiary centre to activate a MET. Retrospective chart review of case patients (n=44, code calls) used to generate candidate items. Clinical judgement used to select final items. No formal validation of final tool reported.                     | Trigger | Expert opinion      | No      | 4  |   |   | ✓ | ✓ | ✓ |   |   |   |   |   |   |   | ✓ | ✓                                                                                                                               | Worsening retractions; cyanosis                                                                                        |
| 37<br>38<br>39<br>40<br>41<br>42<br>43<br>44<br>45<br>46 | Paediatric Medical Emergency Team (PMET)                                       | Initial development for use in a US tertiary centre to activate a MET. Minimal description of tool development – authors deliberately                                                                                                                                                   | Trigger | Expert opinion      | Unclear | 12 | ✓ | ✓ | ✓ | ✓ | ✓ |   |   |   |   |   |   |   | ✓ | ✓                                                                                                                               | Cardiac or respiratory arrest; seizures with apnoea; progressive lethargy; circulatory compromise/acute shock syndrome |





Table 3 – summary of PTTT validation study outcomes

| PTTT                                         | First author, year           | Country | Study population | Study design                       | Number of centres | PTTT used in practice? | Internal / external validation study? | Outcome measures                                              | Sample size     | Score or trigger? | Score tested / maximum score | Which score used (frequency of scoring)?*   | AUROC | Sensitivity | Specificity | PPV  | NPV  | Notes on accuracy / reliability of scoring and missing data                                                                                         | Quality score (max = 24) |
|----------------------------------------------|------------------------------|---------|------------------|------------------------------------|-------------------|------------------------|---------------------------------------|---------------------------------------------------------------|-----------------|-------------------|------------------------------|---------------------------------------------|-------|-------------|-------------|------|------|-----------------------------------------------------------------------------------------------------------------------------------------------------|--------------------------|
| Paediatric Early Warning System (PEWS) score | Duncan 2006 <sup>47</sup>    | Canada  | All in-patients  | Case-control study (retrospective) | 1                 | No                     | Int                                   | Code blue call for actual or impending cardiopulmonary arrest | 215 (87 cases)  | S                 | 5 / 26                       | Max 24hrs before event (hourly)             | 0.90  | 78.0        | 95.0        | 4.2† |      | No details on data abstraction. 13% of eligible cases and 84% of eligible controls excluded due to incomplete clinical data.                        | 14                       |
|                                              | Robson 2013 <sup>28</sup>    | US      | All in-patients  | Case-control study (retrospective) | 1                 | No                     | Ext                                   | Code blue call                                                | 192 (96 cases)  | S                 | 5 / 32                       | Max 24hrs before event (6 hourly)           | 0.85  | 86.6        | 72.2        |      |      | Four researchers scored PTTT from 20 charts, inter-rater reliability of 0.95. No details on extent of missing data.                                 | 8                        |
|                                              | Chapman 2017 <sup>29</sup>   | UK      | All in-patients  | Case-control study (retrospective) | 1                 | No                     | Ext                                   | Death, arrest or unplanned PICU transfer                      | 608 (297 cases) | S                 | 7 / 32                       | Max 48hrs before event (per usual practice) | 0.82  | 70.0        | 75.0        | 72.6 | 72.0 | Data abstraction by single researcher. 36% of observation sets contained HR, RR, O2 Sats, systolic BP, temperature and assessment of consciousness. | 17                       |
| Bedside PEWS                                 | Parshuram 2009 <sup>11</sup> | Canada  | All in-patients  | Case-control study (retrospective) | 1                 | No                     | Int                                   | Urgent PICU transfer (without code blue call)                 | 180 (60 cases)  | S                 | 8 / 26                       | Max 24hrs before event (hourly)             | 0.91  | 82.0        | 93.0        |      |      | Availability of scoring items in medical records varied from 27% (cap refill time) to 93% (oxygen therapy).                                         | 21                       |



|                            |                                          |             |                      |                                    |   |     |     |                                                                           |                    |   |        |                                              |      |      |      |      |      |      |      |                                                                                                                                 |    |
|----------------------------|------------------------------------------|-------------|----------------------|------------------------------------|---|-----|-----|---------------------------------------------------------------------------|--------------------|---|--------|----------------------------------------------|------|------|------|------|------|------|------|---------------------------------------------------------------------------------------------------------------------------------|----|
| Modified Bedside PEWS (a)  | Fuijkschoot 2015 <sup>30</sup> (study 1) | Netherlands | Oncology ward        | Case-cohort study (retrospective)  | 1 | Yes | Int | Emergency medical intervention or reviewed by PICU staff or staff concern | 118 (15 cases)     | S | 8 / 28 | Unclear (minimum 8 hourly)                   |      |      |      |      |      | 73.0 |      | 41% of admissions excluded from study due to incomplete PTTT scores.                                                            | 10 |
|                            | Fuijkschoot 2015 <sup>30</sup> (study 2) | Netherlands | All in-patients      | Case-cohort study (retrospective)  | 1 | Yes | Int | PICU transfer                                                             | Unclear (24 cases) | S | 8 / 28 | Score 2-6hrs before event (minimum 8 hourly) |      |      |      |      |      | 66.6 |      | High rate of exclusions reported due to missing data.                                                                           | 10 |
|                            | Fuijkschoot 2015 <sup>30</sup> (study 3) | Netherlands | All in-patients      | Case-cohort study (prospective)    | 1 | Yes | Int | Emergency medical intervention                                            | Unclear (14 cases) | S | 8 / 28 | Unclear (minimum 8 hourly)                   |      |      |      |      |      | 100  |      | No details on missing data.                                                                                                     | 10 |
|                            | Chapman 2017 <sup>29</sup>               | UK          | All in-patients      | Case-control study (retrospective) | 1 | No  | Ext | Death, arrest or PICU transfer                                            | 608 (297 cases)    | S | 7 / 28 | Max 48hrs before event (per usual practice)  | 0.87 | 69.0 | 91.0 | 87.9 | 79.0 |      |      | See above.                                                                                                                      | 17 |
| Modified Bedside PEWS (b)  | Ross 2015 <sup>49</sup>                  | US          | All in-patients      | Case-control study (retrospective) | 1 | No  | Int | Urgent PICU transfer                                                      | 4628 (848 cases)   | S | 8 / 26 | Max during admission                         |      |      |      |      |      | 70.0 | 84.0 | No details on data abstraction. Respiratory effort category excluded due to difficulty abstracting. No details on missing data. | 9  |
| Modified Brighton PEWS (a) | Tucker 2008 <sup>31</sup>                | US          | General medical unit | Cohort study (prospective)         | 1 | Yes | Int | PICU transfer                                                             | 2,979 (51 cases)   | S | 3 / 11 | Max during admission (4 hourly)              | 0.89 | 90.2 | 74.4 | 5.8  | 99.8 |      |      | Intraclass coefficient of 0.92 reported for two bedside nurses scoring 55 patients. No details on missing data.                 | 14 |

|                            |                            |    |                                                                                                   |                                    |   |     |     |                                                            |                                                                                 |   |        |                                             |      |      |      |      |                                                                                                                                                             |                                                                                                                                                                                                                        |    |
|----------------------------|----------------------------|----|---------------------------------------------------------------------------------------------------|------------------------------------|---|-----|-----|------------------------------------------------------------|---------------------------------------------------------------------------------|---|--------|---------------------------------------------|------|------|------|------|-------------------------------------------------------------------------------------------------------------------------------------------------------------|------------------------------------------------------------------------------------------------------------------------------------------------------------------------------------------------------------------------|----|
|                            | Zhai 2014 <sup>49</sup>    | US | All in-patients                                                                                   | Case-control study (retrospective) | 1 | No  | Ext | Urgent PCU transfer within 24 hrs of admission             | 6,352 (53 cases)                                                                | S | 2 / 11 | Max 24hrs before event (hourly)             | 0.74 | 68.4 | 81.6 | 2.3  | Data extracted from electronic health records. Only included records with complete PEWS score: 64% of eligible cases and 51% of eligible controls excluded. | 17                                                                                                                                                                                                                     |    |
|                            | Fenix 2015 <sup>39</sup>   | US | PICU transfers among all in-patients (excluding haematology oncology, surgical and cardiac wards) | Case-control study (retrospective) | 1 | Yes | Ext | Non-elective PICU transfer followed by deterioration event | 97 PICU transfers (51 cases of PICU transfer followed by 'deterioration event') | S | 3 / 11 | Max during admission                        |      | 80.0 | 43.0 | 61.0 | 67.0                                                                                                                                                        | No details on missing data.                                                                                                                                                                                            | 15 |
| Modified Brighton PEWS (b) | Akre 2010 <sup>45</sup>    | US | All in-patients                                                                                   | Chart review study (retrospective) | 1 | No  | Int | Rapid response team call or code blue call                 | 186 cases (170 RRT calls, 16 code calls)                                        | S | 4 / 13 | Max 24 hrs before event (minimum 4 hourly)  |      | 85.5 |      |      |                                                                                                                                                             | Scores abstracted from charts by single nurse, having calibrated with advanced nurse practitioner. Categories scored missing if any items missing. 25% of charts missing behavioural state, 26% cardiovascular colour. | 14 |
|                            | Chapman 2017 <sup>29</sup> | UK | All in-patients                                                                                   | Case-control study (retrospective) | 1 | No  | Ext | Death, arrest or PICU transfer                             | 608 (297 cases)                                                                 | S | 4 / 13 | Max 48hrs before event (per usual practice) | 0.79 | 61.0 | 84.0 | 78.4 | 69.0                                                                                                                                                        | See above.                                                                                                                                                                                                             | 17 |

|                                                           |                              |    |                        |                                    |   |     |     |                                   |                   |   |         |                                             |      |      |      |      |      |                                                                                                                                                       |    |
|-----------------------------------------------------------|------------------------------|----|------------------------|------------------------------------|---|-----|-----|-----------------------------------|-------------------|---|---------|---------------------------------------------|------|------|------|------|------|-------------------------------------------------------------------------------------------------------------------------------------------------------|----|
| Modified Brighton PEWS (d)                                | Skaletzky 2012 <sup>48</sup> | US | Medical surgical wards | Case-control study (retrospective) | 1 | No  | Int | PICU transfer                     | 350 (100 cases)   | S | 2.5 / 9 | Max 48hrs before event (4 hourly)           | 0.81 | 62.0 | 89.0 |      |      | Data abstracted from medial charts and notes. Behaviour category abstracted from LOC. No details on missing data.                                     | 15 |
|                                                           | Chapman 2017 <sup>29</sup>   | UK | All in-patients        | Case-control study (retrospective) | 1 | No  | Ext | Death, arrest or PICU transfer    | 608 (297 cases)   | S | 4 / 9   | Max 48hrs before event (per usual practice) | 0.74 | 46.0 | 90.0 | 81.3 | 63.0 | See above.                                                                                                                                            | 17 |
| Children's Hospital Early Warning Score (CHEWS)           | McLellan 2014 <sup>50</sup>  | US | All in-patients        | Case-control study (retrospective) | 1 | Yes | Int | Arrest or unplanned PICU transfer | 1,136 (360 cases) | S | 4 / 12  | Max in admission (4 hourly)                 | 0.90 | 84.2 | 80.9 |      |      | No details on missing data.                                                                                                                           | 10 |
| Children's Hospital Cardiac Early Warning Score (C-CHEWS) | McLellan 2013 <sup>23</sup>  | US | Cardiovascular unit    | Case-control study (retrospective) | 1 | Yes | Int | Arrest or unplanned PICU transfer | 312 (64 cases)    | S | 3 / 12  | Max 18hrs before event (4 hourly)           | 0.86 | 95.3 | 76.2 | 50.8 | 98.4 | Study nurse and bedside nurses assessed scores for 37 patients, 67% agreement. No details on missing data.                                            | 9  |
|                                                           | Agulnik 2016 <sup>41</sup>   | US | Oncology unit          | Case-control study (retrospective) | 1 | Yes | Ext | Unplanned PICU transfer           | 330 (110 cases)   | S | 4 / 12  | Max 24 hours before event (4 hourly)        | 0.96 | 86.0 | 95.0 |      |      | PTTT scores abstracted by researcher. Did not abstract if vital signs were present but no PTTT score calculated by nurse. No details on missing data. | 14 |

1  
2  
3  
4  
5  
6  
7  
8  
9  
10  
11  
12  
13  
14  
15  
16  
17  
18  
19  
20  
21  
22  
23  
24  
25  
26  
27  
28  
29  
30  
31  
32  
33  
34  
35  
36  
37  
38  
39  
40  
41  
42  
43  
44  
45  
46

|                                             |                            |           |                                             |                                    |   |     |     |                                                                                       |                 |   |        |                                                   |      |      |      |  |  |                                                                                                                                                                                                                                                          |    |
|---------------------------------------------|----------------------------|-----------|---------------------------------------------|------------------------------------|---|-----|-----|---------------------------------------------------------------------------------------|-----------------|---|--------|---------------------------------------------------|------|------|------|--|--|----------------------------------------------------------------------------------------------------------------------------------------------------------------------------------------------------------------------------------------------------------|----|
|                                             | Agulnik 2017 <sup>42</sup> | Guatemala | Oncology unit                               | Case-control study (retrospective) | 1 | Yes | Ext | Unplanned PICU transfer                                                               | 258 (129 cases) | S | 4 / 12 | Max 24hrs before event (3 hourly)                 |      |      |      |  |  | Researcher evaluated charts and calculated scores, reporting 14% error rate (PTTT score calculated incorrectly) and 3% omission rate (vital signs recorded but no PTTT score calculated). 1 out of 130 cases excluded due to missing PTTT documentation. | 16 |
| Children's Hospital Los Angeles (CHLA) PEWS | Mandell 2015 <sup>40</sup> | US        | In-patients discharged from PICU to ward    | Case-control study (retrospective) | 1 | Yes | Int | Early unplanned re-admission to PICU (within 48 hours of discharge from PICU to ward) | 189 (38 cases)  | S | 2 / 10 | First score assigned on ward, post PICU discharge | 0.71 | 76.0 | 56.0 |  |  | No details on missing data.                                                                                                                                                                                                                              | 12 |
| Melbourne Activation Criteria (MAC)         | Tume 2007 <sup>3</sup>     | UK        | In-patients with an unplanned PICU transfer | Chart review study (retrospective) | 1 | No  | Ext | Unplanned PICU transfer                                                               | 33 cases        | T | N/A    | Unclear                                           |      |      |      |  |  | Data abstracted by two reviewers. Reference to "large number of missing records and observation charts".                                                                                                                                                 | 11 |
|                                             | Tume 2007 <sup>3</sup>     | UK        | In-patients with an unplanned PHDU transfer | Chart review study (retrospective) | 1 | No  | Ext | Unplanned PHDU transfer                                                               | 32 cases        | T | N/A    | Unclear                                           |      |      |      |  |  | See above.                                                                                                                                                                                                                                               | 11 |

|                                                         |                            |    |                                             |                                    |   |    |     |                                         |                  |   |       |                                                 |      |      |      |      |      |                                                                                                                                              |    |
|---------------------------------------------------------|----------------------------|----|---------------------------------------------|------------------------------------|---|----|-----|-----------------------------------------|------------------|---|-------|-------------------------------------------------|------|------|------|------|------|----------------------------------------------------------------------------------------------------------------------------------------------|----|
|                                                         | Edwards 2011 <sup>33</sup> | UK | All in-patients                             | Cohort study (retrospective)       | 1 | No | Ext | Death or unplanned PICU or HDU transfer | 1,000 (16 cases) | T | N/A   | Any trigger over admission (per usual practice) | 0.79 | 68.3 | 83.2 | 3.6  | 99.7 | Observation charts altered to include all PTTT parameters. 56% of records missing at least one component. Missing data assumed to be normal. | 17 |
|                                                         | Chapman 2017 <sup>29</sup> | UK | All in-patients                             | Case-control study (retrospective) | 1 | No | Ext | Death, arrest or PICU transfer          | 608 (297 cases)  | T | N/A   | Max 48hrs before event (per usual practice)     | 0.71 | 93.0 | 49.0 | 64.0 | 88.0 | See above.                                                                                                                                   | 17 |
| Cardiff & Vale Paediatric Early Warning Score (C&VPEWS) | Edwards 2009 <sup>32</sup> | UK | All in-patients                             | Cohort study (prospective)         | 1 | No | Int | Death or unplanned PICU or HDU transfer | 1,000 (16 cases) | S | 2 / 8 | Max score during admission (per usual practice) | 0.86 | 69.5 | 89.9 | 5.9  | 99.7 | Observation charts altered to include all PTTT parameters. 56% of records missing at least one component. Missing data assumed to be normal. | 18 |
|                                                         | Chapman 2017 <sup>29</sup> | UK | All in-patients                             | Case-control study (retrospective) | 1 | No | Ext | Death, arrest or PICU transfer          | 608 (297 cases)  | S | 3 / 8 | Max 48hrs before event (per usual practice)     | 0.89 | 80.0 | 86.0 | 84.0 | 82.0 | See above.                                                                                                                                   | 17 |
| Bristol Paediatric Early Warning Tool (PEWT)            | Tume 2007 <sup>3</sup>     | UK | In-patients with an unplanned PICU transfer | Chart review (retrospective)       | 1 | No | Ext | Unplanned PICU transfer                 | 33 cases         | T | N/A   | Unclear                                         |      |      |      |      |      | See above.                                                                                                                                   | 11 |
|                                                         | Tume 2007 <sup>3</sup>     | UK | In-patients with an unplanned PHDU transfer | Chart review (retrospective)       | 1 | No | Ext | Unplanned PHDU transfer                 | 32 cases         | T | N/A   | Unclear                                         |      |      |      |      |      | See above.                                                                                                                                   | 11 |



|                                                             |                               |    |                 |                                    |   |     |     |                                         |                               |   |       |                                                      |      |      |      |      |      |                                                                                                                                              |                                                                     |    |
|-------------------------------------------------------------|-------------------------------|----|-----------------|------------------------------------|---|-----|-----|-----------------------------------------|-------------------------------|---|-------|------------------------------------------------------|------|------|------|------|------|----------------------------------------------------------------------------------------------------------------------------------------------|---------------------------------------------------------------------|----|
|                                                             | Wright 2011 <sup>35</sup>     | UK | All in-patients | Chart review (retrospective)       | 1 | Yes | Ext | Cardiac arrest                          | 55 cases                      | T | N/A   | If triggered 24hrs before event                      |      | 49.1 |      |      |      |                                                                                                                                              | One case excluded due to missing notes. No details on missing data. | 11 |
|                                                             | O'Loughlin 2012 <sup>34</sup> | UK | All in-patients | Cohort study (prospective)         | 1 | Yes | Ext | PICU transfer                           | 331 (7 cases)                 | T | N/A   | Triggered during admission (12hrly)                  | 0.91 | 100  | 81.0 | 11.0 |      |                                                                                                                                              | No details on missing data.                                         | 6  |
|                                                             | Robson 2013 <sup>28</sup>     | US | All in-patients | Case-control study (retrospective) | 1 | No  | Ext | Code blue call                          | 192 (96 cases)                | T | N/A   | Triggered 24hrs before event (6hrly)                 | 0.75 | 76.3 | 61.5 |      |      | See above.                                                                                                                                   | 8                                                                   |    |
|                                                             | Chapman 2017 <sup>29</sup>    | UK | All in-patients | Case-control study (retrospective) | 1 | No  | Ext | Death, arrest or PICU transfer          | 608 (297 cases)               | T | N/A   | If triggered 48hrs before event (per usual practice) | 0.62 | 96.0 | 28.0 | 56.0 | 88.0 | See above.                                                                                                                                   | 17                                                                  |    |
| Modified Bristol Paediatric Early Warning Tool (PEWT) (b)   | Clayson 2014 <sup>38</sup>    | UK | Cardiac ward    | Cohort study (prospective)         | 1 | Yes | Int | 'A deteriorating patient'               | 126 (unclear number of cases) | T | N/A   | Unclear                                              |      |      |      | 12.5 | 97.0 | No details on missing data.                                                                                                                  | 5                                                                   |    |
| NHS Institute for Innovation and Improvement (NHS III) PEWS | Mason 2016 <sup>14</sup>      | UK | All in-patients | Cohort study (retrospective)       | 1 | No  | Ext | Death or unplanned PICU or HDU transfer | 1,000 (16 cases)              | S | 2 / 7 | Max score over admission (per usual practice)        | 0.88 | 80.0 | 81.0 | 4.3  | 99.7 | Observation charts altered to include all PTTT parameters. 56% of records missing at least one component. Missing data assumed to be normal. | 15                                                                  |    |

|                                                            |                               |    |                             |                                    |   |     |     |                                                 |                  |   |        |                                             |      |      |      |      |      |                                                                                                                                                                       |    |
|------------------------------------------------------------|-------------------------------|----|-----------------------------|------------------------------------|---|-----|-----|-------------------------------------------------|------------------|---|--------|---------------------------------------------|------|------|------|------|------|-----------------------------------------------------------------------------------------------------------------------------------------------------------------------|----|
|                                                            | Chapman 2017 <sup>29</sup>    | UK | All in-patients             | Case-control study (retrospective) | 1 | No  | Ext | Death, arrest or PICU transfer                  | 608 (297 cases)  | S | 2 / 7  | Max 48hrs before event (per usual practice) | 0.82 | 83.0 | 65.0 | 69.6 | 80.0 | See above.                                                                                                                                                            | 17 |
| Logistic regression algorithm                              | Zhai 2014 <sup>19</sup>       | US | All in-patients             | Case-control study (retrospective) | 1 | No  | Ext | Urgent PICU transfer within 24 hrs of admission | 6,352 (53 cases) | S | > 0.5  | Max 24hrs before event (hourly)             | 0.91 | 84.9 | 85.9 | 4.8  |      | Data extracted from electronic health records. No details on extent of missing data but authors report that "missing data was a major cause of incorrect prediction". | 17 |
| Burton Paediatric Early Warning Score (BPEWS)              | Ahmed 2012 <sup>36</sup>      | UK | PICU admissions only        | Chart review (retrospective)       | 1 | Yes | Int | PICU admission                                  | 23               | S | 4 / 19 | Max 24hrs before event (unclear)            |      | 93.0 |      |      |      | Data extracted from case notes by two reviewers. No details on missing data.                                                                                          | 4  |
| 'Between the Flags' Paediatric Early Warning System (PEWS) | Blackstone 2017 <sup>43</sup> | UK | Urgent PICU admissions only | Chart review (retrospective)       | 1 | Yes | Ext | Urgent PICU admission                           | 100              | T | N/A    | Unclear                                     |      | 91.0 |      |      |      | Data extracted from health records. No details on missing data.                                                                                                       | 8  |

All studies conducted in a specialist / tertiary centre.

PPV and NPV values in italics represent results from case-control studies – these values are misleading in isolation because they assume that the wider prevalence rate of the adverse event is equal to the case to control ratio used in the research study (e.g., if the researchers studied 300 cases and 300 controls, the prevalence rate of adverse events for the calculation of PPV is 50%). As per the cohort studies, prevalence rates of critical events are typically far lower among hospitalised paediatric populations than the case/control ratios used in studies, and so PPV values would be considerably lower in clinical practice.

Studies classified as internal validation if the setting for the study was the same hospital and same research team as those who developed the score. Studies classified as external validation if the score was tested in a different centre and by a different research team to those who developed it.

\* Typically, study researchers collected or abstracted multiple PTTT scores for each patient at different time points, but can only use one score per patient for the analysis of the tool's predictive ability. This column specifies which score the researchers used. In most cases, the study team used the maximum PTTT score recorded for each patient in a given study window – e.g., 24 hours prior to a critical event for case patients. The text in parentheses describes the frequency with which scores were assessed or abstracted for each patient, if this information was described in the paper.

† Case-control study, but PPV value calculated based on clinical prevalence of event as measured at local centre during the study

AUROC, area under the receiver operating characteristic curve; Ext, external validation; HFNC, high flow nasal cannula; Int, Internal validation; Max, maximum; N/A, not applicable; NPV, negative predictive value; PHDU, paediatric high-dependency unit; PICU, paediatric intensive care unit; PPV, positive predictive value; PTTT, paediatric track and trigger tool; RRT, rapid response team; S, score; T, trigger; UK, United Kingdom; US, United States.

Table 4 – summary of early warning system effectiveness study outcome

| Outcome                                                                   | First author, year          | Intervention           |                           |                             |                            | PTTT                                                      | Country   | Number of centres | Specialist unit? | Existing RRT / MET? | Population      | Study design                                  | Study duration in months    | Events before, n (rate) | Events after, n (rate) | Effect size (95% CI)       | P Value     | Quality score (max = 26) |
|---------------------------------------------------------------------------|-----------------------------|------------------------|---------------------------|-----------------------------|----------------------------|-----------------------------------------------------------|-----------|-------------------|------------------|---------------------|-----------------|-----------------------------------------------|-----------------------------|-------------------------|------------------------|----------------------------|-------------|--------------------------|
|                                                                           |                             | Implemented a new PTTT | Implemented new RRT / MET | Modified escalation process | Staff training / education |                                                           |           |                   |                  |                     |                 |                                               |                             |                         |                        |                            |             |                          |
| <b>MORTALITY</b>                                                          |                             |                        |                           |                             |                            |                                                           |           |                   |                  |                     |                 |                                               |                             |                         |                        |                            |             |                          |
| Deaths on ward (per 1,000 admissions)                                     | Tibballs 2005 <sup>13</sup> | ✓                      | ✓                         | ✓                           |                            | Melbourne Activation Criteria                             | Australia | 1                 | Y                | N                   | All in-patients | Uncontrolled before-after study (prospective) | 53<br>(41 before, 12 after) | 13<br>(0.12)            | 2<br>(0.06)            | RR = 0.45<br>(0.10-1.99) † | 0.29        | 10                       |
| Hospital-wide deaths (per 100 discharges)                                 | Sharek 2007 <sup>17</sup>   | ✓                      | ✓                         | ✓                           |                            | Paediatric Rapid Response Team triggering criteria        | US        | 1                 | Y                | N                   | All in-patients | Uncontrolled before-after study (prospective) | 84<br>(67 before, 17 after) | 547<br>(1.01)           | 158<br>(0.83)          | RR = 0.82<br>(0.70-0.95)   | <b>.007</b> | 15                       |
| Hospital wide deaths, excluding neonate ICU and ED (per 1,000 discharges) | Zenker 2007 <sup>60</sup>   | ✓                      | ✓                         |                             |                            | RRT activation criteria*                                  | US        | 1                 | Y                | N                   | All in-patients | Uncontrolled before-after study (prospective) | 34<br>(23 before, 11 after) | 97<br>(4.30)            | 52<br>(4.45)           | RR=1.04<br>(0.74-1.45) †   | .57         | 12                       |
| Deaths outside ICU (per 1,000 non-ICU patient-days)                       | Brilli 2007 <sup>15</sup>   | ✓                      | ✓                         | ✓                           |                            | Paediatric Medical Emergency Team triggering criteria (a) | US        | 1                 | Y                | N                   | All in-patients | Uncontrolled before-after study (prospective) | 27<br>(15 before, 12 after) | 9<br>(0.10)             | 2<br>(0.04)            | RR=0.39<br>(0.08-1.80) †   | .13         | 14                       |

|                                                                    |                                    |   |   |   |                                                        |                                                                    |    |   |   |                 |                                                 |                               |                                        |                                         |                            |         |    |
|--------------------------------------------------------------------|------------------------------------|---|---|---|--------------------------------------------------------|--------------------------------------------------------------------|----|---|---|-----------------|-------------------------------------------------|-------------------------------|----------------------------------------|-----------------------------------------|----------------------------|---------|----|
| Ward death rate (per 1,000 ward admissions)                        | Hanson 2010 <sup>61</sup>          | ✓ | ✓ | ✓ | Not described                                          | US                                                                 | 1  | Y | N | All in-patients | Uncontrolled before-after study (retrospective) | 36<br>(24 before, 12 after)   | 13<br>(1.50)                           | 2<br>(0.45)                             | RR = 0.30<br>(0.07–1.31) † | .07     | 18 |
| Total hospital deaths (per 1,000 admissions)                       | Tibballs 2009 <sup>62</sup>        | ✓ | ✓ | ✓ | Melbourne Activation Criteria                          | Australia                                                          | 1  | Y | N | All in-patients | Uncontrolled before-after study (prospective)   | 89<br>(41 before, 48 after)   | 459<br>(4.38)                          | 398<br>(2.87)                           | RR = 0.65<br>(0.57-0.75)   | < .0001 | 15 |
| Deaths on ward (per 1,000 admissions)                              | Tibballs 2009 <sup>62</sup>        | ✓ | ✓ | ✓ | Melbourne Activation Criteria                          | Australia                                                          | 1  | Y | N | All in-patients | Uncontrolled before-after study (prospective)   | 89<br>(41 before, 48 after)   | 13<br>(0.12)                           | 6<br>(0.04)                             | RR = 0.35<br>(0.13-0.92)   | .03     | 15 |
| All-cause hospital mortality (per 1,000 admissions)                | Kotsakis 2011 <sup>63</sup>        | ✓ | ✓ |   | Modified Melbourne Activation Criteria                 | Canada                                                             | 4  | Y | N | All in-patients | Uncontrolled before-after study (prospective)   | 48<br>(24 before, 24 after)   | 553<br>(9.97)                          | 540<br>(9.65)                           | RR = 0.97<br>(0.83-1.12)   | .65     | 18 |
| All cause hospital mortality (per 1,000 discharges)                | Parshuram 2018 <sup>64</sup>       | ✓ | ✓ | ✓ | Bedside PEWS                                           | Belgium, Ireland, Netherlands, England, Italy, Canada, New Zealand | 21 | Y | N | All in-patients | Cluster randomised trial (prospective)          | 18<br>(6 pre, 12 post)        | Con: 61<br>(1.31)<br>Int: 52<br>(1.95) | Con: 147<br>(1.56)<br>Int: 97<br>(1.93) | OR=1.01<br>(0.61-1.69)     | .96     | 23 |
| Hospital mortality (per 1,000 admissions)                          | Kutty 2018 <sup>73</sup>           |   | ✓ |   | NR                                                     | US                                                                 | 38 | Y | N | All in-patients | Interrupted Time Series (retrospective)         | 180<br>(60 before, 120 after) | NA                                     | NA                                      | OR=0.94<br>(0.93-0.95)     | .98     | 20 |
| <b>PICU MORTALITY</b>                                              |                                    |   |   |   |                                                        |                                                                    |    |   |   |                 |                                                 |                               |                                        |                                         |                            |         |    |
| PICU mortality after PICU admission from ward (per PICU admission) | Anwar-al-Haque, 2010 <sup>18</sup> | ✓ | ✓ |   | Paediatric Rapid Response Team triggering criteria (b) | Pakistan                                                           | 1  | Y | N | All in-patients | Uncontrolled before-after study (retrospective) | 18<br>(9 before, 9 after)     | 23<br>(51.11)                          | 5<br>(15.63)                            | RR = 0.31<br>(0.13-0.72) † | .007†   | 6  |

|                                                                                         |                             |   |   |   |   |                                                           |           |   |   |   |                               |                                                 |                             |              |              |                            |                |    |
|-----------------------------------------------------------------------------------------|-----------------------------|---|---|---|---|-----------------------------------------------------------|-----------|---|---|---|-------------------------------|-------------------------------------------------|-----------------------------|--------------|--------------|----------------------------|----------------|----|
| PICU mortality after PICU readmission within 48 hrs of discharge (per 1,000 admissions) | Kotsakis 2011 <sup>63</sup> | ✓ | ✓ |   |   | Modified Melbourne Activation Criteria                    | Canada    | 4 | Y | N | All in-patients               | Uncontrolled before-after study (prospective)   | 48<br>(24 before, 24 after) | 16<br>(0.29) | 7<br>(0.13)  | RR = 0.43<br>(0.17-0.99)   | <b>&lt;.05</b> | 18 |
| PICU mortality after urgent PICU admission from ward (per 1,000 admissions)             | Kotsakis 2011 <sup>63</sup> | ✓ | ✓ |   |   | Modified Melbourne Activation Criteria                    | Canada    | 4 | Y | N | All in-patients               | Uncontrolled before-after study (prospective)   | 48<br>(24 before, 24 after) | 70<br>(1.3)  | 61<br>(1.1)  | RR = 0.90<br>(0.70-1.00)   | .25            | 18 |
| Death prior to discharge (per unplanned PICU transfer)                                  | Bonafide 2014 <sup>65</sup> | ✓ | ✓ |   |   | Bedside PEWS                                              | US        | 1 | Y | N | All in-patients               | Interrupted Time Series study (prospective)     | 59<br>(32 before, 27 after) | 51<br>(6.3)  | 56<br>(6.5)  | RR = 1.03<br>(0.72-1.49) † | .99            | 23 |
| PICU mortality (per PICU admission)                                                     | Duns 2014 <sup>66</sup>     | ✓ |   |   |   | Between the Flags (BTS) tool*                             | Australia | 1 | Y | Y | All in-patients               | Uncontrolled before-after study (prospective)   | 48<br>(24 before, 24 after) | 30<br>(8.57) | 20<br>(5.49) | RR=0.64<br>(0.37-1.11) †   | .14            | 7  |
| Death in PICU (per 1,000 patient-days)                                                  | Agulnik 2017 <sup>67</sup>  | ✓ |   |   | ✓ | Children's Hospital Cardiac Early Warning Score (C-CHEWS) | Guatemala | 1 | Y | N | Oncology unit                 | Uncontrolled before-after study (retrospective) | 24<br>(12 before, 12 after) | 21<br>(1.25) | 22<br>(1.10) | RR=0.89<br>(0.49-1.61) †   | .76            | 19 |
| Death in PICU (per emergency PICU admission)                                            | Sefton 2015 <sup>68</sup>   | ✓ |   | ✓ | ✓ | Modified Bristol PEWT (a)                                 | UK        | 1 | Y | N | All PICU admissions           | Controlled before-after study (retrospective)   | 24<br>(12 before, 12 after) | 17<br>(10.8) | 14<br>(8.4)  | RR = 0.78<br>(0.40-1.53) † | .47            | 16 |
| Deaths in PICU (per unplanned PICU admission)                                           | Kolovos, 2018               | ✓ | ✓ |   |   | RRT activation criteria*                                  | US        | 1 | Y | N | All unplanned PICU admissions | Uncontrolled before-after study (retrospective) | 78<br>(42 before, 36 after) | 54+<br>(4.9) | 40+<br>(3.8) | RR = 0.77<br>(0.52-1.15) † | .20+           | 12 |

|                                                          |                              |   |   |   |                                                           |                                                                    |    |   |   |                 |                                                 |                          |                                  |                                  |                         |            |    |
|----------------------------------------------------------|------------------------------|---|---|---|-----------------------------------------------------------|--------------------------------------------------------------------|----|---|---|-----------------|-------------------------------------------------|--------------------------|----------------------------------|----------------------------------|-------------------------|------------|----|
| PICU mortality (per 1,000 discharges)                    | Parshuram 2018 <sup>64</sup> | ✓ | ✓ | ✓ | Bedside PEWS                                              | Belgium, Ireland, Netherlands, England, Italy, Canada, New Zealand | 21 | Y | N | All in-patients | Cluster randomised trial (prospective)          | 18 (6 pre, 12 post)      | Con: 34 (0.73)<br>Int: 33 (1.24) | Con: 91 (0.96)<br>Int: 56 (1.12) | OR=0.95 (0.48-1.86)     | .88        | 23 |
| <b>CARDIAC ARREST</b>                                    |                              |   |   |   |                                                           |                                                                    |    |   |   |                 |                                                 |                          |                                  |                                  |                         |            |    |
| Cardiac arrests on ward (per 1,000 admissions)           | Tibballs 2005 <sup>13</sup>  | ✓ | ✓ | ✓ | Melbourne Activation Criteria                             | Australia                                                          | 1  | Y | N | All in-patients | Uncontrolled before-after study (prospective)   | 53 (41 before, 12 after) | 20 (0.19)                        | 4 (0.11)                         | RR = 0.58 (0.20-1.70)   | .33        | 10 |
| Cardiopulmonary arrests (per 1,000 non-ICU patient-days) | Brilli 2007 <sup>15</sup>    | ✓ | ✓ | ✓ | Paediatric Medical Emergency Team triggering criteria (a) | US                                                                 | 1  | Y | N | All in-patients | Uncontrolled before-after study (prospective)   | 27 (15 before, 12 after) | 7 (0.08)                         | 2 (0.04)                         | RR=0.50 (0.10-2.42) †   | .11        | 14 |
| Ward cardiac arrest rate (per 1,000 ward admissions)     | Hanson 2010 <sup>61</sup>    | ✓ | ✓ | ✓ | <i>Not described</i>                                      | US                                                                 | 1  | Y | N | All in-patients | Uncontrolled before-after study (retrospective) | 36 (24 before, 12 after) | 11 (1.27)                        | 2 (0.45)                         | RR = 0.35 (0.08-1.58) † | .13        | 18 |
| Ward cardiopulmonary arrests (per 1,000 patient-days)    | Hunt 2008 <sup>16</sup>      | ✓ | ✓ | ✓ | Paediatric Medical Emergency Team triggering criteria     | US                                                                 | 1  | Y | N | All in-patients | Uncontrolled before-after study (prospective)   | 24 (12 before, 12 after) | 5 (0.10)                         | 5 (0.10)                         | RR = 0.98 (0.22-4.24)   | .97        | 17 |
| Preventable cardiac arrests (per 1,000 admissions)       | Tibballs 2009 <sup>62</sup>  | ✓ | ✓ | ✓ | Melbourne Activation Criteria                             | Australia                                                          | 1  | Y | N | All in-patients | Uncontrolled before-after study (prospective)   | 89 (41 before, 48 after) | 17 (0.16)                        | 10 (0.07)                        | RR = 0.45 (0.20-0.97)   | <b>.04</b> | 15 |

1  
2  
3  
4  
5  
6  
7  
8  
9  
10  
11  
12  
13  
14  
15  
16  
17  
18  
19  
20  
21  
22  
23  
24  
25  
26  
27  
28  
29  
30  
31  
32  
33  
34  
35  
36  
37  
38  
39  
40  
41  
42  
43  
44  
45  
46

|                                                            |                              |   |   |  |   |                                                       |                                                                    |    |   |   |                 |                                               |                             |                                        |                                        |                            |                 |    |
|------------------------------------------------------------|------------------------------|---|---|--|---|-------------------------------------------------------|--------------------------------------------------------------------|----|---|---|-----------------|-----------------------------------------------|-----------------------------|----------------------------------------|----------------------------------------|----------------------------|-----------------|----|
| Unexpected cardiac arrests (per 1,000 admissions)          | Tibballs 2009 <sup>62</sup>  | ✓ | ✓ |  | ✓ | Melbourne Activation Criteria                         | Australia                                                          | 1  | Y | N | All in-patients | Uncontrolled before-after study (prospective) | 89<br>(41 before, 48 after) | 20<br>(0.19)                           | 24<br>(0.17)                           | RR = 0.91<br>(0.50-1.64)   | .75             | 15 |
| Actual cardiopulmonary arrests (per 1,000 ward admissions) | Kotsakis 2011 <sup>63</sup>  | ✓ | ✓ |  |   | Modified Melbourne Activation Criteria                | Canada                                                             | 4  | Y | N | All in-patients | Uncontrolled before-after study (prospective) | 48<br>(24 before, 24 after) | 69<br>(1.9)                            | 66<br>(1.8)                            | RR = 0.95<br>(0.76-1.96)   | .68             | 18 |
| Near cardiopulmonary arrests (per 1,000 admissions)        | Kotsakis 2011 <sup>63</sup>  | ✓ | ✓ |  |   | Modified Melbourne Activation Criteria                | Canada                                                             | 4  | Y | N | All in-patients | Uncontrolled before-after study (prospective) | 48<br>(24 before, 24 after) | 123<br>(3.4)                           | 67<br>(1.9)                            | RR = 0.54<br>(0.52-0.57)   | <b>&lt;.001</b> | 18 |
| Cardiac arrests on ward (per 1,000 non-ICU patient-days)   | Bonafide 2014 <sup>65</sup>  | ✓ | ✓ |  |   | Bedside PEWS                                          | US                                                                 | 1  | Y | N | All in-patients | Interrupted Time Series study (prospective)   | 59<br>(32 before, 27 after) | 6+<br>(0.03)                           | 2+<br>(0.01)                           | RR = 0.36<br>(0.07-1.78) † | .21             | 23 |
| Cardiac arrests (per 1,000 patient-days)                   | Parshuram 2018 <sup>64</sup> | ✓ | ✓ |  | ✓ | Bedside PEWS                                          | Belgium, Ireland, Netherlands, England, Italy, Canada, New Zealand | 21 | Y | N | All in-patients | Cluster randomised trial (prospective)        | 18<br>(6 pre, 12 post)      | Con: 18<br>(0.11)<br>Int: 15<br>(0.12) | Con: 32<br>(0.10)<br>Int: 27<br>(0.11) | RR=1.02<br>(0.65-1.62)     | .92             | 23 |
| <b>RESPIRATORY ARREST</b>                                  |                              |   |   |  |   |                                                       |                                                                    |    |   |   |                 |                                               |                             |                                        |                                        |                            |                 |    |
| Ward respiratory arrests (per 1,000 patient-days)          | Hunt 2008 <sup>16</sup>      | ✓ | ✓ |  |   | Paediatric Medical Emergency Team triggering criteria | US                                                                 | 1  | Y | N | All in-patients | Uncontrolled before-after study (prospective) | 24<br>(12 before, 12 after) | 11<br>(0.23)                           | 3<br>(0.06)                            | RR = 0.27<br>(0.07-0.95)   | <b>.04</b>      | 17 |
| <b>CARDIAC OR RESPIRATORY ARREST</b>                       |                              |   |   |  |   |                                                       |                                                                    |    |   |   |                 |                                               |                             |                                        |                                        |                            |                 |    |



|                                                                |                                   |   |   |   |   |                                                           |          |   |   |   |                 |                                                 |                             |               |               |                            |                        |    |
|----------------------------------------------------------------|-----------------------------------|---|---|---|---|-----------------------------------------------------------|----------|---|---|---|-----------------|-------------------------------------------------|-----------------------------|---------------|---------------|----------------------------|------------------------|----|
| Cardiac or respiratory arrest (per 1,000 discharges)           | Zenker 2007 <sup>60</sup>         | ✓ | ✓ |   |   | RRT activation criteria*                                  | US       | 1 | Y | N | All in-patients | Uncontrolled before-after study (prospective)   | 34<br>(23 before, 11 after) | 180<br>(7.98) | 60<br>(5.13)  | RR=0.64<br>(0.48-0.86) †   | .19                    | 12 |
| Code calls (per 1,000 non-ICU patient-days)                    | Brilli 2007 <sup>15</sup>         | ✓ | ✓ |   | ✓ | Paediatric Medical Emergency Team triggering criteria (a) | US       | 1 | Y | N | All in-patients | Uncontrolled before-after study (prospective)   | 27<br>(15 before, 12 after) | 25<br>(0.27)  | 6<br>(0.11)   | RR=0.42<br>(0.17-1.03) †   | .06 <sup>†</sup>       | 14 |
| Code calls (per 1,000 non-ICU patient-days)                    | Sharek 2007 <sup>17</sup>         | ✓ | ✓ |   | ✓ | Paediatric Rapid Response Team triggering criteria        | US       | 1 | Y | N | All in-patients | Uncontrolled before-after study (prospective)   | 84<br>(67 before, 17 after) | 53<br>(0.52)  | 5<br>(0.15)   | RR = 0.29<br>(0.10-0.65)   | <b>.008</b>            | 15 |
| Code calls (per 1,000 admissions)                              | Anwar-al-Haque 2010 <sup>18</sup> | ✓ | ✓ |   |   | Paediatric Rapid Response Team triggering criteria (b)    | Pakistan | 1 | Y | N | All in-patients | Uncontrolled before-after study (retrospective) | 18<br>(9 before, 9 after)   | 26<br>(5.25)  | 12<br>(2.73)  | RR = 0.52<br>(0.26-1.03)   | .06                    | 6  |
| <b>CALLS FOR URGENT REVIEW / ASSISTANCE</b>                    |                                   |   |   |   |   |                                                           |          |   |   |   |                 |                                                 |                             |               |               |                            |                        |    |
| Urgent calls to respiratory therapist (per 1,000 patient-days) | Parshuram 2011 <sup>70</sup>      | ✓ |   | ✓ | ✓ | Bedside PEWS                                              | Canada   | 1 | N | N | All in-patients | Uncontrolled before-after study (prospective)   | 8<br>(3 before, 5 after)    | 8<br>(9.5)    | 8<br>(3.4)    | RR = 0.36<br>(0.13-0.95) † | <b>.04<sup>†</sup></b> | 23 |
| Urgent calls to paediatrician (per 1,000 patient-days)         | Parshuram 2011 <sup>70</sup>      | ✓ |   | ✓ | ✓ | Bedside PEWS                                              | Canada   | 1 | N | N | All in-patients | Uncontrolled before-after study (prospective)   | 8<br>(3 before, 5 after)    | 19<br>(22.6)  | 12<br>(5.1)   | RR = 0.23<br>(0.11-0.46) † | <b>&lt;.0001</b>       | 23 |
| Code blue calls on the ward (per 1,000 admissions)             | Kotsakis 2011 <sup>63</sup>       | ✓ | ✓ |   |   | Modified Melbourne Activation Criteria                    | Canada   | 4 | Y | N | All in-patients | Uncontrolled before-after study (prospective)   | 48<br>(24 before, 24 after) | 210<br>(3.75) | 150<br>(2.70) | RR = 0.71<br>(0.61-0.83)   | <b>&lt;.0001</b>       | 18 |

|                                                                                                     |                              |   |  |   |   |                            |           |   |   |   |                 |                                                 |                             |                 |                 |                             |                  |    |
|-----------------------------------------------------------------------------------------------------|------------------------------|---|--|---|---|----------------------------|-----------|---|---|---|-----------------|-------------------------------------------------|-----------------------------|-----------------|-----------------|-----------------------------|------------------|----|
| Urgent calls to outreach team (per 1,000 admissions)                                                | Duns 2014 <sup>66</sup>      | ✓ |  |   |   | Between the Flags tool*    | Australia | 1 | Y | Y | All in-patients | Uncontrolled before-after study (prospective)   | 48<br>(24 before, 24 after) | 1,058<br>(39.5) | 2,120<br>(76.0) | RR=1.92<br>(1.79-2.07) †    | <b>.02</b>       | 7  |
| RRT calls (per 1,000 patient-days)                                                                  | Panesar 2014 <sup>71</sup>   |   |  | ✓ |   | Modified Brighton PEWS (e) | US        | 1 | Y | Y | All in-patients | Uncontrolled before-after study (retrospective) | 42<br>(18 before, 24 after) | 44<br>(3.14)    | 69<br>(4.23)    | RR = 1.35<br>(0.92-1.96) †  | .11              | 15 |
| RRT calls (per 1,000 patient days)                                                                  | Douglas 2016 <sup>72</sup>   | ✓ |  | ✓ | ✓ | Modified Brighton PEWS (b) | US        | 1 | Y | Y | All in-patients | Uncontrolled before-after study (retrospective) | 24<br>(12 before, 12 after) | 194<br>(6.17)   | 292<br>(9.80)   | RR = 1.59<br>(1.33-.1.90) † | <b>&lt;.001</b>  | 12 |
| Code calls (per 1,000 patient days)                                                                 | Douglas 2016 <sup>72</sup>   | ✓ |  | ✓ | ✓ | Modified Brighton PEWS (b) | US        | 1 | Y | Y | All in-patients | Uncontrolled before-after study (retrospective) | 24<br>(12 before, 12 after) | 31<br>(0.98)    | 20<br>(0.67)    | RR = 0.68<br>(0.39-1.19) †  | .21              | 12 |
| <b>PICU TRANSFERS</b>                                                                               |                              |   |  |   |   |                            |           |   |   |   |                 |                                                 |                             |                 |                 |                             |                  |    |
| Transfers from ward to other specialist units (per 1,000 patient-days)                              | Parshuram 2011 <sup>70</sup> | ✓ |  | ✓ | ✓ | Bedside PEWS               | Canada    | 1 | N | N | All in-patients | Uncontrolled before-after study (prospective)   | 8<br>(3 before, 5 after)    | 5<br>(5.9)      | 19<br>(8.1)     | RR = 1.37<br>(0.51-3.63) †  | .54 <sup>+</sup> | 23 |
| Clinical deterioration events on ward prior to transfer to specialist unit (per 1,000 patient-days) | Parshuram 2011 <sup>70</sup> | ✓ |  | ✓ | ✓ | Bedside PEWS               | Canada    | 1 | N | N | All in-patients | Uncontrolled before-after study (prospective)   | 8<br>(3 before, 5 after)    | 2<br>(2.4)      | 1<br>(0.43)     | RR = 0.18<br>(0.02-1.97) †  | .16 <sup>+</sup> | 23 |

|                                                                                    |                              |   |   |  |   |                                                 |                                                                    |    |   |   |                 |                                                 |                          |                                    |                                     |                         |             |    |
|------------------------------------------------------------------------------------|------------------------------|---|---|--|---|-------------------------------------------------|--------------------------------------------------------------------|----|---|---|-----------------|-------------------------------------------------|--------------------------|------------------------------------|-------------------------------------|-------------------------|-------------|----|
| PICU transfers (per 1,000 admissions)                                              | Duns 2014 <sup>66</sup>      | ✓ |   |  |   | Between the Flags tool*                         | Australia                                                          | 1  | Y | Y | All in-patients | Uncontrolled before-after study (prospective)   | 48 (24 before, 24 after) | 350 (13.1)                         | 364 (13.1)                          | RR=1.00 (0.86-1.16) †   | .98         | 7  |
| Unplanned PICU transfers from ward (per 1,000 non-ICU patient-days)                | Bonafide 2014 <sup>65</sup>  | ✓ | ✓ |  |   | Bedside PEWS                                    | US                                                                 | 1  | Y | N | All in-patients | Interrupted Time Series study (prospective)     | 59 (32 before, 27 after) | 874 (4.54)                         | 936 (5.25)                          | IRR = 0.73 (0.46-1.14)  | .16         | 23 |
| Unplanned transfers to PICU from ward (per 1,000 patient-days)                     | Agulnik 2017 <sup>67</sup>   | ✓ |   |  | ✓ | Children's Hospital Cardiac Early Warning Score | Guatemala                                                          | 1  | Y | N | Oncology unit   | Uncontrolled before-after study (retrospective) | 24 (12 before, 12 after) | 157 (9.3)                          | 130 (6.5)                           | RR = 0.70 (0.56-0.88) † | <b>.003</b> | 19 |
| Urgent PICU admissions (per 1,000 patient-days)                                    | Parshuram 2018 <sup>64</sup> | ✓ | ✓ |  | ✓ | Bedside PEWS                                    | Belgium, Ireland, Netherlands, England, Italy, Canada, New Zealand | 21 | Y | N | All in-patients | Cluster randomised trial (prospective)          | 18 (6 pre, 12 post)      | Con: 652 (4.01)<br>Int: 469 (3.62) | Con: 1178 (3.83)<br>Int: 828 (3.29) | RR=0.95 (0.82-1.09)     | .45         | 23 |
| <b>PICU OUTCOMES</b>                                                               |                              |   |   |  |   |                                                 |                                                                    |    |   |   |                 |                                                 |                          |                                    |                                     |                         |             |    |
| Critical deterioration events after PICU transfer (per 1,000 non-ICU patient-days) | Bonafide 2014 <sup>65</sup>  | ✓ | ✓ |  |   | Bedside PEWS                                    | US                                                                 | 1  | Y | N | All in-patients | Interrupted Time Series study (prospective)     | 59 (32 before, 27 after) | 260† (1.35)                        | 282† (1.58)                         | IRR = 0.38 (0.20-0.75)  | <b>.01</b>  | 23 |

|                                                                                                 |                             |   |   |   |   |                           |    |   |   |   |                     |                                               |                             |               |               |                            |                  |    |
|-------------------------------------------------------------------------------------------------|-----------------------------|---|---|---|---|---------------------------|----|---|---|---|---------------------|-----------------------------------------------|-----------------------------|---------------|---------------|----------------------------|------------------|----|
| Mechanical ventilation within 1hr of unplanned PICU transfer (per unplanned transfer to PICU)   | Bonafide 2014 <sup>65</sup> | ✓ | ✓ |   |   | Bedside PEWS              | US | 1 | Y | N | All in-patients     | Interrupted Time Series study (prospective)   | 59<br>(32 before, 27 after) | 45<br>(5.1)   | 42<br>(4.5)   | RR = 0.87<br>(0.58-1.31) † | .51              | 23 |
| Mechanical ventilation within 12hrs of unplanned PICU transfer (per unplanned transfer to PICU) | Bonafide 2014 <sup>65</sup> | ✓ | ✓ |   |   | Bedside PEWS              | US | 1 | Y | N | All in-patients     | Interrupted Time Series study (prospective)   | 59<br>(32 before, 27 after) | 112<br>(12.8) | 103<br>(11.0) | IRR = 0.17<br>(0.07-0.44)  | <b>&lt;0.001</b> | 23 |
| Vasopressor within 1hr of unplanned PICU transfer (per unplanned transfer to PICU)              | Bonafide 2014 <sup>65</sup> | ✓ | ✓ |   |   | Bedside PEWS              | US | 1 | Y | N | All in-patients     | Interrupted Time Series study (prospective)   | 59<br>(32 before, 27 after) | 41<br>(4.7)   | 16<br>(1.7)   | RR = 0.36<br>(0.21-0.64) † | <b>&lt;0.001</b> | 23 |
| Vasopressors within 12hrs of unplanned PICU transfer (per unplanned transfer to PICU)           | Bonafide 2014 <sup>65</sup> | ✓ | ✓ |   |   | Bedside PEWS              | US | 1 | Y | N | All in-patients     | Interrupted Time Series study (prospective)   | 59<br>(32 before, 27 after) | 71<br>(8.1)   | 57<br>(6.1)   | IRR = 0.20<br>(0.06-0.62)  | <b>.006</b>      | 23 |
| Invasive ventilation in PICU (per emergency PICU admission)                                     | Sefton 2015 <sup>68</sup>   | ✓ |   | ✓ | ✓ | Modified Bristol PEWT (a) | UK | 1 | Y | N | All PICU admissions | Controlled before-after study (retrospective) | 24<br>(12 before, 12 after) | 118<br>(75.2) | 104<br>(62.7) | RR = 0.83<br>(0.72-0.97) † | <b>.002</b>      | 16 |

|                                                                      |                              |   |   |   |   |                                                 |                                                                    |    |   |   |                               |                                                 |                          |                                   |                                    |                         |              |    |
|----------------------------------------------------------------------|------------------------------|---|---|---|---|-------------------------------------------------|--------------------------------------------------------------------|----|---|---|-------------------------------|-------------------------------------------------|--------------------------|-----------------------------------|------------------------------------|-------------------------|--------------|----|
| Inotropes in PICU (per emergency PICU admission)                     | Sefton 2015 <sup>68</sup>    | ✓ |   | ✓ | ✓ | Modified Bristol PEWT (a)                       | UK                                                                 | 1  | Y | N | All PICU admissions           | Controlled before-after study (retrospective)   | 24 (12 before, 12 after) | 50 (31.8)                         | 40 (24.1)                          | RR = 0.76 (0.53-1.08) † | .12          | 16 |
| Intubation within 24hrs of PICU admission (per 1,000 patient-days)   | Agulnik 2017 <sup>67</sup>   | ✓ |   |   | ✓ | Children's Hospital Cardiac Early Warning Score | Guatemala                                                          | 1  | Y | N | Oncology unit                 | Uncontrolled before-after study (retrospective) | 24 (12 before, 12 after) | 11 (0.65)                         | 18 (0.90)                          | RR=1.38 (0.65-2.92) †   | .46          | 19 |
| Vasopressors within 24hrs of PICU admission (per 1,000 patient-days) | Agulnik 2017 <sup>67</sup>   | ✓ |   |   | ✓ | Children's Hospital Cardiac Early Warning Score | Guatemala                                                          | 1  | Y | N | Oncology unit                 | Uncontrolled before-after study (retrospective) | 24 (12 before, 12 after) | 29 (1.72)                         | 37 (1.86)                          | RR=1.08 (0.66-1.75) †   | .60          | 19 |
| Mechanical ventilation during PICU admission (per PICU admission)    | Kolovos 2018 <sup>69</sup>   | ✓ | ✓ |   |   | RRT activation criteria*                        | US                                                                 | 1  | Y | N | All unplanned PICU admissions | Uncontrolled before-after study (retrospective) | 78 (42 before, 36 after) | 285 (25.98)                       | 233 (22.09)                        | RR = 0.85 (0.73-0.99) † | <b>.03</b> † | 12 |
| Intubation within 1hr of PICU admission (per PICU admission)         | Kolovos 2018 <sup>69</sup>   | ✓ | ✓ |   |   | RRT activation criteria*                        | US                                                                 | 1  | Y | N | All unplanned PICU admissions | Uncontrolled before-after study (retrospective) | 78 (42 before, 36 after) | 49 (4.47)                         | 88 (8.34)                          | RR = 1.87 (1.33-2.62)   | <b>.0003</b> | 12 |
| Significant clinical deterioration events (per 1,000 patient-days)   | Parshuram 2018 <sup>64</sup> | ✓ | ✓ |   | ✓ | Bedside PEWS                                    | Belgium, Ireland, Netherlands, England, Italy, Canada, New Zealand | 21 | Y | N | All in-patients               | Cluster randomised trial (prospective)          | 18 (6 pre, 12 post)      | Con: 144 (0.89)<br>Int: 80 (0.62) | Con: 259 (0.84)<br>Int: 127 (0.50) | RR=0.77 (0.61-0.97)     | <b>.03</b>   | 23 |

1  
2  
3  
4  
5  
6  
7  
8  
9  
10  
11  
12  
13  
14  
15  
16  
17  
18  
19  
20  
21  
22  
23  
24  
25  
26  
27  
28  
29  
30  
31  
32  
33  
34  
35  
36  
37  
38  
39  
40  
41  
42  
43  
44  
45  
46

P-values in bold denote statistical significance (<0.05).

A critical deterioration event is defined as transfer to the intensive care unit (ICU) followed by non-invasive or invasive mechanical ventilation or vasopressor infusion within 12 hours<sup>65</sup>

\*Indicates a PTTT not described or validated in the published literature

† Data calculated by research team, based on data presented in the journal article. All data calculated via <https://www.medcalc.org>.

Con, Control group; ED, emergency department; Int, Intervention group; IRR, incident risk ratio; MET, medical emergency team; OR, odds ratio; PICU, paediatric intensive care unit; PTTT, paediatric track and trigger tool; RRT, rapid response team; RR, relative risk.

For peer review only



Figure 1: PRISMA flow diagram of study inclusion

190x254mm (300 x 300 DPI)

**Supplementary Table 1 – Details of search strategy****Database Search**

The search was across a range of databases from their inception to January 2015 then an update was carried out in September 2016 and the second update May 2018.

A preliminary search strategy was developed using a set of key papers known to the group for Ovid Medline using both text words and Medical subject headings. The search strategy was modified according to the indexing systems of the other databases.

| Databases and Database platform                                                 | Original search results<br>January 2015                                         | Update September 2016                                                          | Update May 2018                                                                 |
|---------------------------------------------------------------------------------|---------------------------------------------------------------------------------|--------------------------------------------------------------------------------|---------------------------------------------------------------------------------|
| British Nursing Index (Proquest)                                                | 19                                                                              | 12                                                                             | 25                                                                              |
| CINAHL (Cumulative Index of<br>Nursing and Allied Health Literature)<br>(Ebsco) | 206                                                                             | 17                                                                             | 29                                                                              |
| Cochrane Central Register of<br>Controlled Trials (Wiley)                       | 43                                                                              | 4                                                                              | 30                                                                              |
| EMBASE (OVID)                                                                   | 1065                                                                            | 206                                                                            | 431                                                                             |
| HMIC (Health Management<br>Information Centre) (OVID)                           | 70                                                                              | 1                                                                              | 75                                                                              |
| Medline (OVID)                                                                  | 943                                                                             | 135                                                                            | 328                                                                             |
| Medline in Process (OVID)                                                       | 43                                                                              | 69                                                                             | 45                                                                              |
| Scopus (Elsevier)                                                               | 747                                                                             | 85                                                                             | 234                                                                             |
| Web of Knowledge (Science Science<br>Citation Indexes) (Thomson Reuter)         | 400                                                                             | 82                                                                             | 166                                                                             |
| <b>Total</b>                                                                    | <b>3536</b><br><i>(prior to removing duplicates<br/>and irrelevant studies)</i> | <b>611</b><br><i>(prior to removing duplicates<br/>and irrelevant studies)</i> | <b>1363</b><br><i>(prior to removing duplicates<br/>and irrelevant studies)</i> |

**Supplementary search**



## Search Information

### Supplementary search

NB. Restricted each of the below searches by dates: 01/01/2016 – 16/05/2018

| Trials Registers                                                                                                                                                                                    | Hits January 2015 | Update September 2016 | Update June 2018 |
|-----------------------------------------------------------------------------------------------------------------------------------------------------------------------------------------------------|-------------------|-----------------------|------------------|
| ClinicalTrials.gov<br><a href="https://clinicaltrials.gov/">https://clinicaltrials.gov/</a>                                                                                                         | 6                 | 4                     | 0                |
| UK Clinical Trials Gateway<br><a href="http://www.ukctg.nihr.ac.uk/default.aspx">http://www.ukctg.nihr.ac.uk/default.aspx</a>                                                                       | 3 (duplicates)    | 5 (1 duplicate)       | 0                |
| The WHO trial search portal for studies worldwide:<br><a href="http://apps.who.int/trialsearch">http://apps.who.int/trialsearch</a>                                                                 | 1 (duplicate)     | 0                     | 0                |
| Journal site                                                                                                                                                                                        | Hits              |                       |                  |
| Archives of Disease in Childhood<br><a href="http://adc.bmj.com/">http://adc.bmj.com/</a>                                                                                                           | 14                | 4                     | 7                |
| BMJ<br><a href="http://www.bmj.com/theBMJ">http://www.bmj.com/theBMJ</a>                                                                                                                            | 1                 | 0                     | 1                |
| BMJ Quality and safety<br><a href="http://qualitysafety.bmj.com/">http://qualitysafety.bmj.com/</a>                                                                                                 | 7                 | 4                     | 2                |
| JAMA Pediatrics<br><a href="http://archpedi.jamanetwork.com/journal.aspx">http://archpedi.jamanetwork.com/journal.aspx</a>                                                                          | 1                 | 0                     | 0                |
| Journal of Critical Care<br><a href="http://www.jccjournal.org/">http://www.jccjournal.org/</a>                                                                                                     | 3                 | 1                     | 0                |
| Journal of Pediatrics ( American)<br><a href="http://www.jpeds.com/">http://www.jpeds.com/</a>                                                                                                      | 1                 | 0                     | 2                |
| Journal of Paediatrics and Child Health (Australian)<br><a href="http://onlinelibrary.wiley.com/journal/10.1111/(ISSN)1440-1754">http://onlinelibrary.wiley.com/journal/10.1111/(ISSN)1440-1754</a> | 2                 | 2                     | 0                |

|                                                                                                                                                                         |                  |                     |                     |
|-------------------------------------------------------------------------------------------------------------------------------------------------------------------------|------------------|---------------------|---------------------|
| Lancet<br><a href="http://www.thelancet.com/">http://www.thelancet.com/</a>                                                                                             | 0                | 0                   | 0                   |
| New England Journal of Medicine<br><a href="http://www.nejm.org/">http://www.nejm.org/</a>                                                                              | 0                | 0                   | 0                   |
| Pediatrics<br><a href="http://pediatrics.aappublications.org/">http://pediatrics.aappublications.org/</a>                                                               | 6                | 2                   | 0                   |
| Pediatric Critical Care Medicine<br><a href="http://journals.lww.com/pccmjournal/pages/default.aspx">http://journals.lww.com/pccmjournal/pages/default.aspx</a>         | 14               | 6                   | 3                   |
| <b>Websites and organisations</b>                                                                                                                                       | <b>HITS</b>      |                     |                     |
| American Society of Anesthesiologists<br><a href="https://www.asahq.org/">https://www.asahq.org/</a>                                                                    | 1                | 0                   | 0                   |
| American Academy of Pediatrics<br><a href="http://www.aap.org/en-us/Pages/Default.aspx">http://www.aap.org/en-us/Pages/Default.aspx</a>                                 | 1                |                     | 0                   |
| Association of Anaesthetists of Great Britain and Ireland<br><a href="http://www.aagbi.org/">http://www.aagbi.org/</a>                                                  | 0                | 0                   | 0                   |
| Australian Medical Council<br><a href="http://www.amc.org.au/">http://www.amc.org.au/</a>                                                                               | 1                | 0                   | 0                   |
| Royal College of Paediatrics and Child Health<br><a href="http://www.rcpch.ac.uk/">http://www.rcpch.ac.uk/</a>                                                          | 1                | 0                   | 4                   |
| Paediatric Nursing Association Europe<br><a href="http://www.rcn.org.uk/">http://www.rcn.org.uk/</a>                                                                    | 9                |                     | 0                   |
| European Federation of Critical Care Nursing Associations<br><a href="http://www.efccna.org/">http://www.efccna.org/</a>                                                | No Search Option | No Search Option    | No Search Option    |
| Royal Australasian College of Physicians ( Division of Child Health)<br><a href="https://www.racp.edu.au/page/paed-policy">https://www.racp.edu.au/page/paed-policy</a> | 0                | 0                   | 0                   |
| Royal College of Physicians (inclusive of National Clinical Guideline Centre)<br><a href="https://www.rcplondon.ac.uk/">https://www.rcplondon.ac.uk/</a>                | 2                | 0                   | 0                   |
| The NHS Institute for Innovation and Improvement<br><a href="http://www.institute.nhs.uk/">http://www.institute.nhs.uk/</a>                                             | 4                | Site cease to exist | Site cease to exist |
| NICE: Eyes on Evidence                                                                                                                                                  | 4                | 1                   | 1                   |

|                                                                                                                                                                                                   |    |    |    |
|---------------------------------------------------------------------------------------------------------------------------------------------------------------------------------------------------|----|----|----|
| <a href="https://www.evidence.nhs.uk/about-evidence-services/bulletins-and-alerts/eyes-on-evidence">https://www.evidence.nhs.uk/about-evidence-services/bulletins-and-alerts/eyes-on-evidence</a> |    |    |    |
| <b>TOTAL</b>                                                                                                                                                                                      | 82 | 30 | 20 |

**Total = 112**

## Search Strategies

### British Nursing Index

"Paediatric Early Warning" OR ("pediatric early warning" OR "pediatric rapid response") OR ("paediatric rapid response" OR "Bedside paediatric early warning") OR ("Pediatric Advanced Warning Score" OR "Paediatric Advanced Warning Score")

### Cochrane Controlled Register of Trials (CENTRAL)

Last Saved: 16/05/2018 11:39:08.703

Description:

| ID  | Search                         |
|-----|--------------------------------|
| #1  | "early warning score*"         |
| #2  | "early warning system*"        |
| #3  | "early warning tool*"          |
| #4  | "VitalPAC Early Warning Score" |
| #5  | "activation criteria"          |
| #6  | "Rapid Response Team"          |
| #7  | "Rapid Response system*"       |
| #8  | "Track and trigger"            |
| #9  | "trigger tools"                |
| #10 | "calling criteria"             |
| #11 | "Alert criteria"               |

1  
2  
3  
4  
5  
6  
7  
8  
9  
10  
11  
12  
13  
14  
15  
16  
17  
18  
19  
20  
21  
22  
23  
24  
25  
26  
27  
28  
29  
30  
31  
32  
33  
34  
35  
36  
37  
38  
39  
40  
41  
42  
43  
44  
45  
46

- #12 "Rapid Response"
- #13 #1 or #2 or #3 or #4 or #5 or #6 or #7 or #8 or #9 or #10 or #11 or #12
- #14 pediatric\* or paediatric\* or infant\* or child\* or baby or toddler or babies or teen\* or adolescent\*
- #15 #13 and #14
- #16 "Pediatric Early Warning"
- #17 "Paediatric Early Warning"
- #18 "p?ediatric alert"
- #19 "Pediatric Rapid Response"
- #20 "Pediatric Advanced Warning Score\*"
- #21 "Paediatric Advanced Warning Score\*"
- #22 "infant early warning"
- #23 "Bedside PEWS"
- #24 "Bedside paediatric early warning"
- #25 #16 or #17 or #18 or #19 or #20 or #21 or #22 or #23 or #24
- #26 #15 or #25 Publication Year from 2016 to 2018

**Cumulative Index to Nursing and Allied Health Literature (CINAHL) via EBSCO**

| Search ID#                   | Search Terms                                                                                                                                                                                                      |
|------------------------------|-------------------------------------------------------------------------------------------------------------------------------------------------------------------------------------------------------------------|
| <input type="checkbox"/> S11 | S7 OR S10                                                                                                                                                                                                         |
| <input type="checkbox"/> S10 | S1 AND S8                                                                                                                                                                                                         |
| <input type="checkbox"/> S9  | S2 AND S8                                                                                                                                                                                                         |
| <input type="checkbox"/> S8  | S3 AND S4                                                                                                                                                                                                         |
| <input type="checkbox"/> S7  | S5 OR S6                                                                                                                                                                                                          |
| <input type="checkbox"/> S6  | TX "infant early warning" OR TX "bedside PEWS" OR TX "Bedside paediatric early warning"                                                                                                                           |
| <input type="checkbox"/> S5  | TX "p?ediatric early warning system" OR TX "P?ediatric Early Warning" OR TX "p?ediatric early warning score" OR TX "p?ediatric risk of mortality" OR TX "P?ediatric Rapid Response Team" OR TX "P?ediatric alert" |
| <input type="checkbox"/> S4  | AB pediatric* or paediatric* or infant*1 or child* or baby or toddler or babies or teen* or adolescent*                                                                                                           |

- 1  
2  
3  
4  
5  
6  
7  
8  
9  
10
- S3 TX "track-and-trigger" OR TX "VitalPAC Early Warning Score" OR TX "activation criteria". OR TX "trigger tool\*" OR TX "Rapid Response" OR TX "activation criteria". OR TX "early warning" OR TX "Alert criteria" OR TX outreach N3 emergency
  - S2 Detecting W3 deterioration
  - S1 "early warning"

11  
12  
13  
14  
15  
16

### Database of Abstracts of Review of Effects (DARE)

(Paediatric early warning) OR (pediatric early warning) OR (Paediatric Rapid Response) IN DARE  
( early warning) OR (track-and-trigger system) OR ( Rapid Response) IN DARE  
(emergency team) AND (early warning) IN DARE

17  
18  
19  
20

### Excerpta Medica Database (EMBASE)

Database: EMBASE <1947-Present>

Search Strategy:

- 21  
22  
23  
24  
25  
26  
27  
28  
29  
30  
31  
32  
33  
34  
35  
36  
37  
38  
39  
40  
41  
42  
43  
44  
45  
46
- 
- 1 ("early warning" adj5 scor\*).ab,ti. (568)
  - 2 ("early warning" adj5 system\* adj5 (deteriorat\* or mortality or death or outcome\* or harm\* or safety)).ab,ti. (51)
  - 3 "acute illness severity".mp. (38)
  - 4 early intervention/ and ((prevent\* or reduc\* or improv\*) adj5 (deteriorat\* or mortality or death or outcome\* or harm\* or safety)).ab,ti. (1185)
  - 5 ("early medical intervention" adj5 (tool\* or scor\* or index\* or indicator\* or indice\* or assessment\* or guide\* or instrument\* or criteria or parameter\* or deteriorat\* or mortality or death or monitor\* or outcome\* or harm\* or safety)).ab,ti. (10)
  - 6 \*"severity of illness index"/ and ((tool\* or scor\* or index\* or indicator\* or indice\* or assessment\* or instrument\* or criteria or parameter\*) adj5 ((prevent\* or reduc\* or improv\*) adj5 (deteriorat\* or mortality or death or outcome\* or harm\* or safety))).ab,ti. (3)
  - 7 exp Health Status Indicators/ and ((tool\* or scor\* or index\* or indicator\* or indice\* or assessment\* or instrument\* or criteria or parameter\*) adj3 ((prevent\* or reduc\* or improv\*) adj3 (deteriorat\* or mortality or death or outcome\* or harm\* or safety))).ab,ti. (7)
  - 8 rapid response team/ (849)
  - 9 "alarm monitor"/ and (prevent\* or reduc\* or improv\*).mp. (245)
  - 10 ("clinical alarm" adj5 (prevent\* or reduc\* or improv\*)).mp. (2)
  - 11 (outreach adj3 emergency).tw. (46)
  - 12 VitalPAC Early Warning Score.tw. (15)
  - 13 medical emergency team.tw. (395)
  - 14 Rapid Response Systems.mp. (140)

1  
2  
3  
4  
5  
6  
7  
8  
9  
10  
11  
12  
13  
14  
15  
16  
17  
18  
19  
20  
21  
22  
23  
24  
25  
26  
27  
28  
29  
30  
31  
32  
33  
34  
35  
36  
37  
38  
39  
40  
41  
42  
43  
44  
45  
46

- 15 ("rapid response" adj5 (prevent\* or reduc\* or improv\*)).tw. (191)  
16 ("medical device" adj3 (prevent\* or reduc\* or improv\*)).mp. (187)  
17 (((Detecting or managing) adj3 deterioration) and warning).tw. (11)  
18 track-and-trigger system.tw. (24)  
19 (Track adj trigger).tw. (4)  
20 (Track and trigger).tw. (241)  
21 trigger tools.tw. (47)  
22 ("alert criteria" or "activation criteria" or "calling criteria").tw. (209)  
23 SBAR technique\*.mp. (5)  
24 (score adj3 severity of illness).tw. (393)  
25 or/1-24 (4295)  
26 limit 25 to (infant <to one year> or child <unspecified age> or preschool child <1 to 6 years> or school child <7 to 12 years> or adolescent <13 to 17 years>) (533)  
27 P?ediatric Early Warning.mp. (120)  
28 p?ediatric alert.tw. (7)  
29 p?ediatric early warning systems.mp. (4)  
30 p?ediatric risk of mortality.tw. (527)  
31 P?ediatric Rapid Response Team.tw. (14)  
32 Point-of-Care Systems/ and ((paediatric or pediatric) adj3 (improve or identify or detect\* or outcome or early or critical or emergency)).tw. (23)  
33 P?ediatric Advanced Warning Score.tw. (3)  
34 neonatal early warning.tw. (1)  
35 infant early warning.tw. (0)  
36 p?ediatric rapid response.tw. (31)  
37 Bedside paediatric early warning.tw. (5)  
38 Bedside PEWS.tw. (7)  
39 or/27-38 (707)  
40 26 or 39 (1155)  
41 limit 40 to human (1065)

**Health Management Information Consortium (HMIC) database**

Database: HMIC Health Management Information Consortium

Search Strategy:  
-----

- 1 ("early warning" adj5 scor\*).ab,ti. (23)
- 2 ("early warning" adj5 system\* adj5 (deteriorat\* or mortality or death or outcome\* or harm\* or safety)).ab,ti. (6)
- 3 "acute illness severity".mp. (3)
- 4 "early medical intervention"/ and ((prevent\* or reduc\* or improv\*) adj5 (deteriorat\* or mortality or death or outcome\* or harm\* or safety)).ab,ti. (0)
- 5 ("early medical intervention" adj5 (tool\* or scor\* or index\* or indicator\* or indice\* or assessment\* or guide\* or instrument\* or criteria or parameter\* or deteriorat\* or mortality or death or monitor\* or outcome\* or harm\* or safety)).ab,ti. (0)
- 6 Health Status Indicators.mp. and ((tool\* or scor\* or index\* or indicator\* or indice\* or assessment\* or instrument\* or criteria or parameter\*) adj3 ((prevent\* or reduc\* or improv\*) adj3 (deteriorat\* or mortality or death or outcome\* or harm\* or safety))).ab,ti. (0)
- 7 exp "Severity of illness index"/ and ((tool\* or scor\* or index\* or indicator\* or indice\* or assessment\* or instrument\* or criteria or parameter\*) adj5 ((prevent\* or reduc\* or improv\*) adj5 (deteriorat\* or mortality or death or outcome\* or harm\* or safety))).ab,ti. (0)
- 8 "activation criteria".ab,ti. (2)
- 9 exp Rapid response teams/ (39)
- 10 Clinical Alarms.mp. (0)
- 11 (outreach adj3 emergency).tw. (2)
- 12 VitalPAC Early Warning Score.tw. (0)
- 13 medical emergency team.tw. (15)
- 14 Rapid Response Systems.mp. (8)
- 15 Rapid Response Team.tw. (27)
- 16 ((Detecting or managing) adj3 deterioration).tw. (1)
- 17 track-and-trigger system.tw. (2)
- 18 (Track adj trigger).tw. (1)
- 19 (Track and trigger).tw. (8)
- 20 trigger tools.tw. (4)
- 21 Calling criteria.tw. (1)
- 22 Alert criteria.mp. (1)
- 23 Rapid response.tw. (111)
- 24 (score adj3 severity of illness).tw. (3)
- 25 or/1-24 (171)
- 26 (pediatric\* or paediatric\* or infant\*1 or child\* or baby or toddler or babies or teen\* or adolescent\*).mp. (40161)
- 27 25 and 26 (14)
- 28 p?ediatric alert.tw. (0)
- 29 p?ediatric early warning systems.mp. (1)
- 30 p?ediatric risk of mortality.tw. (4)

- 1  
2  
3 31 Pediatric Rapid Response Team.tw. (0)  
4 32 Point-of-Care.mp. and ((paediatric or pediatric) adj3 (improve or identify or detect\* or outcome or early or critical or emergency)).tw. (0)  
5 33 Pediatric Advanced Warning Score.tw. (0)  
6 34 neonatal early warning.tw. (0)  
7 35 infant early warning.tw. (0)  
8 36 paediatric rapid response.tw. (1)  
9 37 pediatric rapid response.tw. (0)  
10 38 Bedside paediatric early warning.tw. (0)  
11 39 Bedside PEWS.tw. (0)  
12 40 p?ediatric early warning.mp. (2)  
13 41 care.mp. and ((paediatric or pediatric) adj3 (improve or identify or detect\* or outcome or early or critical or emergency)).tw. [mp=title, other title,  
14 abstract, heading words] (57)  
15 42 or/28-41 (59)  
16 43 27 or 42 (70)  
17  
18  
19  
20  
21

## Medline

Database: Ovid MEDLINE(R) <1946 to January Week 2 2015>

Search Strategy:

- 25  
26 1 ("early warning" adj5 scor\*).ab,ti. (260)  
27 2 ("early warning" adj5 system\* adj5 (deteriorat\* or mortality or death or outcome\* or harm\* or safety)).ab,ti. (24)  
28 3 "acute illness severity".mp. (21)  
29 4 "early medical intervention"/ and ((prevent\* or reduc\* or improv\*) adj5 (deteriorat\* or mortality or death or outcome\* or harm\* or safety)).ab,ti. (99)  
30 5 ("early medical intervention" adj5 (tool\* or scor\* or index\* or indicator\* or indice\* or assessment\* or guide\* or instrument\* or criteria or parameter\*  
31 or deteriorat\* or mortality or death or monitor\* or outcome\* or harm\* or safety)).ab,ti. (7)  
32 6 exp Health Status Indicators/ and ((tool\* or scor\* or index\* or indicator\* or indice\* or assessment\* or instrument\* or criteria or parameter\*) adj3  
33 ((prevent\* or reduc\* or improv\*) adj3 (deteriorat\* or mortality or death or outcome\* or harm\* or safety))).ab,ti. (166)  
34 7 "Severity of Illness Index"/ and ((tool\* or scor\* or index\* or indicator\* or indice\* or assessment\* or instrument\* or criteria or parameter\*) adj5  
35 ((prevent\* or reduc\* or improv\*) adj5 (deteriorat\* or mortality or death or outcome\* or harm\* or safety))).ab,ti. (274)  
36 8 exp Hospitals/ and ((Detecting or managing) adj3 deterioration).tw. (2)  
37 9 ("medical device" adj3 (prevent\* or reduc\* or improv\*)).mp. (58)  
38 10 ("alert criteria" or "activation criteria" or "calling criteria").tw. (121)  
39  
40  
41  
42  
43  
44  
45  
46



- 1  
2  
3 11 Hospital Rapid Response Team/ (334)  
4 12 Clinical Alarms/ (332)  
5 13 (outreach adj3 emergency).tw. (32)  
6 14 VitalPAC Early Warning Score.tw. (10)  
7 15 medical emergency team.tw. (247)  
8 16 Rapid Response Systems.mp. (87)  
9 17 Rapid Response Team.tw. (185)  
10 18 (((Detecting or managing) adj3 deterioration) and warning).tw. (8)  
11 19 track-and-trigger system.tw. (14)  
12 20 (Track adj trigger).tw. (2)  
13 21 (Track and trigger).tw. (137)  
14 22 trigger tools.tw. (22)  
15 23 SBAR technique\*.mp. (3)  
16 24 ("rapid response" adj5 (prevent\* or reduc\* or improv\*)).tw. (117)  
17 25 (score adj3 severity of illness).tw. (243)  
18 26 or/1-25 (2286)  
19 27 limit 26 to (humans and "all child (0 to 18 years)") (453)  
20 28 P?ediatric Early Warning.mp. (38)  
21 29 p?ediatric alert.tw. (5)  
22 30 p?ediatric early warning systems.mp. (3)  
23 31 p?ediatric risk of mortality.tw. (400)  
24 32 P?ediatric Rapid Response Team.tw. (6)  
25 33 Point-of-Care Systems/ and ((paediatric or pediatric) adj3 (improve or identify or detect\* or outcome or early or critical or emergency)).tw. (79)  
26 34 P?ediatric Advanced Warning Score.tw. (2)  
27 35 neonatal early warning.tw. (0)  
28 36 infant early warning.tw. (0)  
29 37 p?ediatric rapid response.tw. (20)  
30 38 Bedside paediatric early warning.tw. (2)  
31 39 Bedside PEWS.tw. (2)  
32 40 or/28-39 (542)  
33 41 27 or 40 (943)  
34  
35  
36  
37  
38

### Scopus

1  
2  
3  
4  
5  
6  
7  
8  
9  
10  
11  
12  
13  
14  
15  
16  
17  
18  
19  
20  
21  
22  
23  
24  
25  
26  
27  
28  
29  
30  
31  
32  
33  
34  
35  
36  
37  
38  
39  
40  
41  
42  
43  
44  
45  
46

( TITLE-ABS-KEY ( "Paediatric Early Warning" OR "Pediatric Early Warning" OR "Pediatric Advanced Warning Score" OR "Paediatric Advanced Warning Score" OR "neonatal early warning" OR "infant early warning" OR "pediatric rapid response" OR "Paedatric rapid response" ) ) OR ( ( ( TITLE-ABS-KEY ( "early warning" W/5 scor\* ) ) OR ( TITLE-ABS-KEY ( "Rapid Response" ) ) OR ( TITLE-ABS-KEY ( "track-and-trigger system" ) ) OR ( TITLE-ABS-KEY ( "track and trigger" ) ) OR ( TITLE-ABS-KEY ( "trigger tool\*" ) ) OR ( TITLE-ABS-KEY ( "alert criteria" ) ) OR ( TITLE-ABS-KEY ( "activation criteria" ) ) OR ( TITLE-ABS-KEY ( "VitalPAC Early Warning Score" ) ) ) ) AND ( TITLE-ABS-KEY ( pediatric\* OR paediatric\* OR infant\* OR child\* OR baby OR toddler OR babies OR teen\* OR adolescent\* ) ) ) AND ( LIMIT-TO ( SUBJAREA , "MEDI" ) OR LIMIT-TO ( SUBJAREA , "NURS" ) OR LIMIT-TO ( SUBJAREA , "NEUR" ) )

**Web of Science**

- # [400](#) #17 OR #1  
19 **Refined by:** [excluding] **WEB OF SCIENCE CATEGORIES:** ( PARASITOLOGY OR PUBLIC ENVIRONMENTAL OCCUPATIONAL HEALTH OR BIOCHEMISTRY MOLECULAR BIOLOGY OR OPTICS OR HEALTH CARE SCIENCES SERVICES OR MYCOLOGY OR MANAGEMENT OR LINGUISTICS OR INSTRUMENTS INSTRUMENTATION OR MICROBIOLOGY OR INFORMATION SCIENCE LIBRARY SCIENCE OR MATHEMATICAL COMPUTATIONAL BIOLOGY OR GERIATRICS GERONTOLOGY OR ENGINEERING BIOMEDICAL OR FOOD SCIENCE TECHNOLOGY OR ENVIRONMENTAL STUDIES OR ENGINEERING ENVIRONMENTAL OR ENGINEERING ELECTRICAL ELECTRONIC OR HEALTH POLICY SERVICES OR TOXICOLOGY OR EDUCATION EDUCATIONAL RESEARCH OR NUTRITION DIETETICS OR SUBSTANCE ABUSE OR ECONOMICS OR MEDICINE RESEARCH EXPERIMENTAL OR STATISTICS PROBABILITY OR DEVELOPMENTAL BIOLOGY OR MEDICAL INFORMATICS OR SOCIOLOGY OR DENTISTRY ORAL SURGERY MEDICINE OR PSYCHOLOGY EXPERIMENTAL OR COMPUTER SCIENCE ARTIFICIAL INTELLIGENCE OR METEOROLOGY ATMOSPHERIC SCIENCES OR CHEMISTRY ANALYTICAL OR MEDICAL LABORATORY TECHNOLOGY OR CELL BIOLOGY OR DEMOGRAPHY OR BUSINESS FINANCE OR COMPUTER SCIENCE INTERDISCIPLINARY APPLICATIONS OR AUDIOLOGY SPEECH LANGUAGE PATHOLOGY OR PSYCHOLOGY DEVELOPMENTAL OR COMPUTER SCIENCE INFORMATION SYSTEMS OR PLANNING DEVELOPMENT )  
Indexes=SCI-EXPANDED, SSCI, CPCI-S, CPCI-SSH Timespan=1900-2015
- # [499](#) #17 OR #1  
18 Indexes=SCI-EXPANDED, SSCI, CPCI-S, CPCI-SSH Timespan=1900-2015
- # [487](#) #16 AND #15

- 1  
2  
3  
4  
5  
6  
7  
8  
9  
10  
11  
12  
13  
14  
15  
16  
17  
18  
19  
20  
21  
22  
23  
24  
25  
26  
27  
28  
29  
30  
31  
32  
33  
34  
35  
36  
37  
38  
39  
40  
41  
42  
43  
44  
45  
46
- 17 Indexes=SCI-EXPANDED, SSCI, CPCI-S, CPCI-SSH Timespan=1900-2015
- # [8,044](#) #14 OR #13 OR #12 OR #11 OR #10 OR #9 OR #8 OR #7 OR #6 OR #5 OR #4 OR #3 OR #2
- 16 Indexes=SCI-EXPANDED, SSCI, CPCI-S, CPCI-SSH Timespan=1900-2015
- # [1,689,232](#) **TOPIC:** (( pediatric\* OR paediatric\* OR infant\* OR child\* OR baby OR toddler OR babies OR teen\* OR adolescent\*))
- 15 Indexes=SCI-EXPANDED, SSCI, CPCI-S, CPCI-SSH Timespan=1900-2015
- # [130](#) **TOPIC:** ("Severity of Illness Index" and ((tool\* or scor\* or index\* or indicator\* or indice\* or assessment\* or instrument\* or criteria or parameter\*) SAME ((prevent\* or reduc\* or improv\*) SAME (deteriorat\* or mortality or death or outcome\* or harm\* or safety))))
- 14 Indexes=SCI-EXPANDED, SSCI, CPCI-S, CPCI-SSH Timespan=1900-2015
- # [63](#) **TOPIC:** (("early medical intervention" SAME (tool\* or scor\* or index\* or indicator\* or indice\* or assessment\* or guide\* or instrument\* or criteria or parameter\* or deteriorat\* or mortality or death or monitor\* or outcome\* or harm\* or safety)))
- 13 Indexes=SCI-EXPANDED, SSCI, CPCI-S, CPCI-SSH Timespan=1900-2015
- # [28](#) **TOPIC:** ("early medical intervention" and ((prevent\* or reduc\* or improv\*) SAME (deteriorat\* or mortality or death or outcome\* or harm\* or safety)))
- 12 Indexes=SCI-EXPANDED, SSCI, CPCI-S, CPCI-SSH Timespan=1900-2015
- # [1,206](#) **TOPIC:** ("early warning" SAME system\* SAME (deteriorat\* or mortality or death or outcome\* or harm\* or safety))
- 11 Indexes=SCI-EXPANDED, SSCI, CPCI-S, CPCI-SSH Timespan=1900-2015
- # [2](#) **TOPIC:** ("SBAR technique")
- 10 Indexes=SCI-EXPANDED, SSCI, CPCI-S, CPCI-SSH Timespan=1900-2015
- # [7](#) **TOPIC:** ("VitalPAC Early Warning Score")
- 9 Indexes=SCI-EXPANDED, SSCI, CPCI-S, CPCI-SSH Timespan=1900-2015
- # [123](#) **TOPIC:** ("activation criteria")
- 8 Indexes=SCI-EXPANDED, SSCI, CPCI-S, CPCI-SSH Timespan=1900-2015
- # [16](#) TS=("alert criteria")
- 7 Indexes=SCI-EXPANDED, SSCI, CPCI-S, CPCI-SSH Timespan=1900-2015
- # [159](#) TS=("trigger tool\*")
- 6 Indexes=SCI-EXPANDED, SSCI, CPCI-S, CPCI-SSH Timespan=1900-2015
- # [45](#) TS=("track and trigger")

1  
2  
3  
4  
5  
6  
7  
8  
9  
10  
11  
12  
13  
14  
15  
16  
17  
18  
19  
20  
21  
22  
23  
24  
25  
26  
27  
28  
29  
30  
31  
32  
33  
34  
35  
36  
37  
38  
39  
40  
41  
42  
43  
44  
45  
46

5 Indexes=SCI-EXPANDED, SSCI, CPCI-S, CPCI-SSH Timespan=1900-2015  
# [15](#) TS=("track-and-trigger system")  
4 Indexes=SCI-EXPANDED, SSCI, CPCI-S, CPCI-SSH Timespan=1900-2015  
# [6,100](#) TS=("Rapid Response")  
3 Indexes=SCI-EXPANDED, SSCI, CPCI-S, CPCI-SSH Timespan=1900-2015  
# [604](#) TS=("early warning" SAME scor\*)  
2 Indexes=SCI-EXPANDED, SSCI, CPCI-S, CPCI-SSH Timespan=1900-2015  
# [88](#) TS=("Paediatric Early Warning" OR "Pediatic Early Warning" OR "Pediatic Advanced Warning Score"  
1 OR "Paediatric Advanced Warning Score" OR "neonatal early warning" OR "infant early warning" OR  
"pediatric rapid response" OR "Paedatric rapid response")  
Indexes=SCI-EXPANDED, SSCI, CPCI-S, CPCI-SSH Timespan=1900-2015

#### PUMA Supplementary searches

##### Search terms to use:

"Pediatric Early warning"  
"Paediatric Early warning"  
"Pediatric Rapid Response Team"  
"Paediatric Rapid Response Team"  
PEWS  
"Paediatric trigger tools"  
"Pediatric trigger tools"

## Supplementary Table 2 - PICOS criteria for inclusion of studies

### Question 1 – development / validation studies

| Parameter           | Inclusion criteria                                                                                                                                                                                                         | Exclusion criteria                                                       |
|---------------------|----------------------------------------------------------------------------------------------------------------------------------------------------------------------------------------------------------------------------|--------------------------------------------------------------------------|
| <i>Patients</i>     | Children aged 0-18 who are in-patients in a hospital                                                                                                                                                                       | Adult patients; children in emergency departments or neonatal unit       |
| <i>Intervention</i> | Development or validation of a PTTT                                                                                                                                                                                        | Acuity or triage tools, tools developed for use in emergency departments |
| <i>Comparator</i>   | Not applicable                                                                                                                                                                                                             |                                                                          |
| <i>Outcomes</i>     | Mortality and critical events including: arrests, code calls, transfer to higher level of care (e.g., ICU/HDU), senior review, RRT/MET activation, acuity at PICU admission and critical interventions on the ward or PICU |                                                                          |
| <i>Study design</i> | Chart or case reviews; cohort studies; case-control studies, observational studies                                                                                                                                         | Reviews, editorials or opinion pieces                                    |

### Question 2 – effectiveness studies

| Parameter           | Inclusion criteria                                                                                                                                                                                                                                                        | Exclusion criteria                                                                                                                                        |
|---------------------|---------------------------------------------------------------------------------------------------------------------------------------------------------------------------------------------------------------------------------------------------------------------------|-----------------------------------------------------------------------------------------------------------------------------------------------------------|
| <i>Patients</i>     | Children aged 0-18 who are in-patients in a hospital                                                                                                                                                                                                                      | Adult patients<br>Children in emergency departments or neonatal unit                                                                                      |
| <i>Intervention</i> | Implementation of any 'paediatric early warning system' intervention (with or without a PTTT) – including implementing a new PTTT, RRT/MET implementation, educational initiatives or communications tools aimed at improving identification of deteriorating in-patients | Acuity or triage tools, tools developed for use in emergency departments, interventions whose purpose was not identification of deteriorating in-patients |
| <i>Comparator</i>   | Not applicable                                                                                                                                                                                                                                                            |                                                                                                                                                           |
| <i>Outcomes</i>     | Mortality and critical events including: arrests, code calls, transfer to higher level of care (e.g., ICU/HDU), senior review, RRT/MET activation, acuity at PICU admission and critical interventions on the ward or PICU                                                |                                                                                                                                                           |
| <i>Study design</i> | Randomised controlled trials, non-randomised controlled trials, before-after studies (controlled or uncontrolled); interrupted time series studies                                                                                                                        | Reviews, editorials or opinion pieces                                                                                                                     |

## Supplementary Table 3 – Template Quality Assessment Forms

## QUALITY ASSESSMENT FOR DEVELOPMENT AND VALIDATION STUDIES

| Criteria     | Yes (2)                                                                 | Partial (1)                                                                                          | No (0)                                                                                                                                 | N/A                                                                     | Score                                     |
|--------------|-------------------------------------------------------------------------|------------------------------------------------------------------------------------------------------|----------------------------------------------------------------------------------------------------------------------------------------|-------------------------------------------------------------------------|-------------------------------------------|
| 1            | Is the hypothesis / aim / objective of the study clearly described?     | Easily identified in introduction / method.                                                          | Vague / incomplete or found in other parts of paper (than introduction/method)                                                         | Aim / Objective no reported                                             |                                           |
| 2            | Was the score developed comprehensively?                                | Evidence base / Expert opinion / Delphi method                                                       | Decided within research team                                                                                                           | No info / unclear                                                       |                                           |
| 3            | Are the characteristics of the patients in the study clearly described? | Reproducible criteria used to categorise participants                                                | Poorly define criteria / incomplete information                                                                                        | No baseline / demographic info                                          |                                           |
| 4            | Is the study design well described and appropriate?                     | Well described, easy to find in paper                                                                | Design not clearly described / design only partially answers the question                                                              | Design poorly described or does not answer study question               |                                           |
| 5            | Are the study sample representative of the intended population?         | A full description of the target population is given with the sample selected in a non-biased manner | Sample selected from a known population however, selection strategy likely introduces bias but not enough to seriously distort results | Sample recruited from an unknown population in an opportunistic fashion |                                           |
| 6            | Are population characteristics controlled for and adequately described? | Appropriate control at design/analysis stage                                                         | Incomplete control/description or not considered but unlikely to seriously influence results                                           | Not controlled for and likely to seriously influence results            |                                           |
| 7            | Was compliance/use of the PEWS reliable?                                | Compliance / use was well described and reliably implemented                                         | Compliance / use was not well described or not reliably implemented                                                                    | Compliance / use was not reported                                       |                                           |
| 8            | Was consideration given for data collected at different times / sites   | Well described reason why data was collected at different time points                                | Data was collected at different times due to specific opportunity                                                                      | No explanation for data collection at different time points             | Data was collected at the same time point |
| 9            | Are the main findings clearly described?                                | Simple outcome data reported for all major findings                                                  | Incomplete or inappropriate descriptive statistics                                                                                     | No/inadequate descriptive statistics                                    |                                           |
| 10           | Are methods of analysis adequately described and appropriate?           | Described and appropriate                                                                            | Not reported but probably appropriate or some tests appropriate, some not                                                              | Methods not described and cannot be determined                          |                                           |
| 11           | Are the conclusions supported by the results                            | All conclusions supported by data                                                                    | Some of the major conclusions are supported by the data; some are not or speculative interpretations are not indicated as such         | None/few of major conclusions supported by the data                     |                                           |
| 12           | How was missing data handled                                            | Missing data was reported and handled appropriately                                                  | Missing data was reported but unable to determine how it was handled or it wasn't handled appropriately                                | Missing data was not reported                                           | No missing data                           |
| <b>Total</b> |                                                                         |                                                                                                      |                                                                                                                                        |                                                                         |                                           |

MAX. Score: 24

## QUALITY ASSESSMENT FOR EFFECTIVENESS STUDIES

| Criteria     | Yes (2)                                                                 | Partial (1)                                                                                          | No (0)                                                                                                                                 | N/A                                                                     | Score                                     |
|--------------|-------------------------------------------------------------------------|------------------------------------------------------------------------------------------------------|----------------------------------------------------------------------------------------------------------------------------------------|-------------------------------------------------------------------------|-------------------------------------------|
| 1            | Is the hypothesis / aim / objective of the study clearly described?     | Easily identified in introduction / method.                                                          | Vague / incomplete or found in other parts of paper (than introduction/method)                                                         | Aim / Objective no reported                                             |                                           |
| 2            | Was the score developed comprehensively?                                | Evidence base / Expert opinion / Delphi method                                                       | Decided within research team                                                                                                           | No info / unclear                                                       |                                           |
| 3            | Are the characteristics of the patients in the study clearly described? | Reproducible criteria used to categorise participants                                                | Poorly define criteria / incomplete information                                                                                        | No baseline / demographic info                                          |                                           |
| 4            | Is the study design well described and appropriate?                     | Well described, easy to find in paper                                                                | Design not clearly described / design only partially answers the question                                                              | Design poorly described or does not answer study question               |                                           |
| 5            | Are the study sample representative of the intended population?         | A full description of the target population is given with the sample selected in a non-biased manner | Sample selected from a known population however, selection strategy likely introduces bias but not enough to seriously distort results | Sample recruited from an unknown population in an opportunistic fashion |                                           |
| 6            | Was the PEWS well implemented?                                          | Implementation was well reported and appropriately applied                                           | Implementation was not well reported or not appropriate                                                                                | No info / unclear                                                       |                                           |
| 7            | Are population characteristics controlled for and adequately described? | Appropriate control at design/analysis stage                                                         | Incomplete control/description or not considered but unlikely to seriously influence results                                           | Not controlled for and likely to seriously influence results            |                                           |
| 8            | Was compliance/use of the PEWS reliable?                                | Compliance / use was well described and reliably implemented                                         | Compliance / use was not well described or not reliably implemented                                                                    | Compliance / use was not reported                                       |                                           |
| 9            | Was consideration given for data collected at different times / sites   | Well described reason why data was collected at different time points                                | Data was collected at different times due to specific opportunity                                                                      | No explanation for data collection at different time points             | Data was collected at the same time point |
| 10           | Are the main findings clearly described?                                | Simple outcome data reported for all major findings                                                  | Incomplete or inappropriate descriptive statistics                                                                                     | No/inadequate descriptive statistics                                    |                                           |
| 11           | Are methods of analysis adequately described and appropriate?           | Described and appropriate                                                                            | Not reported but probably appropriate or some tests appropriate, some not                                                              | Methods not described and cannot be determined                          |                                           |
| 12           | Are the conclusions supported by the results                            | All conclusions supported by data                                                                    | Some of the major conclusions are supported by the data; some are not or speculative interpretations are not indicated as such         | None/few of major conclusions supported by the data                     |                                           |
| 13           | How was missing data handled                                            | Missing data was reported and handled appropriately                                                  | Missing data was reported but unable to determine how it was handled or it wasn't handled appropriately                                | Missing data was not reported                                           | No missing data                           |
| <b>Total</b> |                                                                         |                                                                                                      |                                                                                                                                        |                                                                         |                                           |

**MAX. Score: 26**

Supplementary Table 4 –Validation papers excluded from analysis

| PTTT                                                      | First author, year          | Country | Study population                            | Study design                       | Number of centres | PTTT used in practice? | Internal / external validation study? | Outcome measures                                  | Sample size     | Score or trigger? | Study overview and reason for exclusion from validation results                                                                                                                                                                                                                                                                                                                                                                                                                                                                                     | Quality score (max = 24) |
|-----------------------------------------------------------|-----------------------------|---------|---------------------------------------------|------------------------------------|-------------------|------------------------|---------------------------------------|---------------------------------------------------|-----------------|-------------------|-----------------------------------------------------------------------------------------------------------------------------------------------------------------------------------------------------------------------------------------------------------------------------------------------------------------------------------------------------------------------------------------------------------------------------------------------------------------------------------------------------------------------------------------------------|--------------------------|
| Modified Brighton PEWS (a)                                | Garlick 2013 <sup>20</sup>  | US      | All in-patients (MET calls only)            | Case-control study (retrospective) | 1                 | N                      | Ext                                   | Transfer to PICU                                  | 267 (116 cases) | S                 | Describes review of MET calls (n=267) to evaluate predictive ability of Modified Brighton PEWS tool for identifying children requiring transfer to PICU (n=116). Results presented in terms of association between PEWS and odds of transfer to higher level of care – no evaluation of performance characteristics such as AUROC, sensitivity or specificity.                                                                                                                                                                                      | 8                        |
|                                                           | Medar 2015 <sup>21</sup>    | Unclear | RRT calls only                              | Chart review (retrospective)       | 1                 | NR                     | Ext                                   | RRT call                                          | 61              | S                 | Describes retrospective review of RRT calls (n=61) to evaluate Modified Brighton PEWS at time of admission and time of RRT call. Report higher median PEWS score for patients at time of RRT call compared to admission. No evaluation of performance characteristics such as AUROC, sensitivity or specificity.                                                                                                                                                                                                                                    | 6                        |
| Texas Children's Hospital (TCH) PAWS                      | Bell 2013 <sup>22</sup>     | US      | General medical ward & two specialist units | Chart review (retrospective)       | 1                 | Y                      | Int                                   | Other validated scales (e.g., Glasgow Coma Scale) | 150             | S                 | Describes development and implementation of the TCH PAWS tool in three wards of a specialist paediatric unit in the US. TCH PAWS amended locally from the Brighton PEWS. Reports on internal reliability (correlation coefficients between 3 categories of the score) and inter-rater reliability of scoring among nurses. Also compares scores on sub-categories to other measures, e.g., the Behavioural sub-score is compared to the Glasgow Coma Scale. No evaluation of performance characteristics such as AUROC, sensitivity or specificity. | 12                       |
| Cardiac Children's Hospital Early Warning Score (C-CHEWS) | McLellan 2013 <sup>23</sup> | US      | Cardiac unit                                | Tool development                   | 1                 | Y                      | Int                                   | Cardiac ICU transfer                              | 27              | S                 | Describes the development and implementation of a modified version of the Children's Hospital Early Warning score for cardiac patients. Results focus on tool modification and implementation challenges – no evaluation of performance characteristics such as AUROC, sensitivity or specificity. Validation of the tool described in a separate paper.                                                                                                                                                                                            | 9                        |
| Burn-specific PEWS                                        | Rahman 2014 <sup>24</sup>   | US      | Specialist burn unit                        | Chart review (retrospective)       | 1                 | Y                      | Int                                   | Burn injuries                                     | 50              | S                 | Conference abstract only. Describes development and implementation of a modified version of the Brighton PEWS, for use with in-patients with burn injuries. Analysis of 50 randomly selected charts – results focus on compliance with scoring and relationship between PTTT score and extent of burn injuries. No evaluation of performance characteristics such as AUROC, sensitivity or specificity.                                                                                                                                             | 13                       |



|   |                                                                                                                                                                                                                                                                                                                                                                                                                                 |                              |       |                                                |                                    |   |   |     |                                                                          |                 |   |                                                                                                                                                                                                                                                                                                                                                                                                                                                                                                                                                                                                |    |  |
|---|---------------------------------------------------------------------------------------------------------------------------------------------------------------------------------------------------------------------------------------------------------------------------------------------------------------------------------------------------------------------------------------------------------------------------------|------------------------------|-------|------------------------------------------------|------------------------------------|---|---|-----|--------------------------------------------------------------------------|-----------------|---|------------------------------------------------------------------------------------------------------------------------------------------------------------------------------------------------------------------------------------------------------------------------------------------------------------------------------------------------------------------------------------------------------------------------------------------------------------------------------------------------------------------------------------------------------------------------------------------------|----|--|
| 1 | Bedside Paediatric Early Warning Score (PEWS)                                                                                                                                                                                                                                                                                                                                                                                   | Hopkins 2013 <sup>25</sup>   | US    | All in-patients (code blue and RRT calls only) | Chart review (retrospective)       | 1 | N | Ext | PICU transfer and critical intervention in PICU among RRT and code calls | 113 (64 cases)  | S | Conference abstract only. Describes retrospective chart review of code blue and RRT calls over a year – Bedside PEWS scores calculated and comparisons drawn between patients eventually transferred to PICU and those who stayed on ward. Preliminary analysis given in terms of mean PEWS scores for different groups – no evaluation of performance characteristics such as AUROC, sensitivity or specificity.                                                                                                                                                                              | 6  |  |
| 2 |                                                                                                                                                                                                                                                                                                                                                                                                                                 | Gawronski 2013 <sup>26</sup> | Italy | Bone marrow transplant unit                    | Case-control study (retrospective) | 1 | N | Ext | Urgent PICU transfer, PICU consult or death                              | 21 (11 cases)   | S | Conference abstract only. Describes case-control study evaluating Bedside PEWS in an Italian bone marrow transplant unit, in relation to urgent PICU transfers or consultations. Preliminary analysis only – comparison of mean PTTT scores for cases and controls. No evaluation of performance characteristics such as AUROC, sensitivity or specificity.                                                                                                                                                                                                                                    | 6  |  |
| 3 | Bristol Paediatric Early Warning Tool (PEWT)                                                                                                                                                                                                                                                                                                                                                                                    | Haines 2006 <sup>12</sup>    | UK    | All in-patients                                | Chart review (retrospective)       | 1 | Y | Int | Transfer to PICU or HDU                                                  | 360 (180 cases) | T | Describes development and piloting of the Bristol PEWT in a UK tertiary centre. Only included children who would have triggered the pilot version of the tool (n=360) and then identified PICU or HDU transfers from this population. Paper presents specificity and sensitivity outcomes but they are incorrectly calculated, so results not included in analysis.                                                                                                                                                                                                                            | 9  |  |
| 4 | Modified Bristol PEWT (a)                                                                                                                                                                                                                                                                                                                                                                                                       | Sefton 2014 <sup>27</sup>    | UK    | All in-patients                                | Chart review (retrospective)       | 1 | Y | Int | Transfer to PICU, cardiac / respiratory arrest or unexpected death       | Unclear         | T | Conference abstract only. Describes a retrospective review of 5 years of data from locally implemented PTTT in a UK tertiary centre, presenting a multiple regression model identifying seven components (including age) most strongly associated with subsequent adverse event if triggered. Of the six clinical elements, all were associated with increased odds of an adverse event, except nurse concern which was significantly associated with decreased odds of an adverse event. No evaluation of overall PTTT performance characteristics such as AUROC, sensitivity or specificity. | 10 |  |
| 5 | All studies conducted in a specialist / tertiary centre.                                                                                                                                                                                                                                                                                                                                                                        |                              |       |                                                |                                    |   |   |     |                                                                          |                 |   |                                                                                                                                                                                                                                                                                                                                                                                                                                                                                                                                                                                                |    |  |
| 6 | Studies classified as internal validation if the setting for the study was the same hospital and same research team as those who developed the score. Studies classified as external validation if the score was tested in a different centre and by a different research team to those who developed it.                                                                                                                       |                              |       |                                                |                                    |   |   |     |                                                                          |                 |   |                                                                                                                                                                                                                                                                                                                                                                                                                                                                                                                                                                                                |    |  |
| 7 | AUROC, area under the receiver operator characteristic curve; Ext, external validation ; HFNC, high flow nasal cannula; Int, Internal validation; NPV, negative predictive value; PHDU, paediatric high-dependency unit; PICU, paediatric intensive care unit ; PPV, positive predictive value; PTTT, paediatric track and trigger tool; RRT, rapid response team; S, score; T, trigger; UK, United Kingdom; US, United States; |                              |       |                                                |                                    |   |   |     |                                                                          |                 |   |                                                                                                                                                                                                                                                                                                                                                                                                                                                                                                                                                                                                |    |  |

Supplementary Table 5 – Effectiveness papers excluded from analysis

| First author, year          | Intervention           |                           |                             |                            | PTTT                                                | Country | Number of centres | Specialist unit? | Existing RRT / MET? | Population                      | Study design                                    | Study duration in months (before & after intervention) | Description and reason for excluding from analysis                                                                                                                                                                                                                                                                                                                                                                          | Quality score (max = 26) |
|-----------------------------|------------------------|---------------------------|-----------------------------|----------------------------|-----------------------------------------------------|---------|-------------------|------------------|---------------------|---------------------------------|-------------------------------------------------|--------------------------------------------------------|-----------------------------------------------------------------------------------------------------------------------------------------------------------------------------------------------------------------------------------------------------------------------------------------------------------------------------------------------------------------------------------------------------------------------------|--------------------------|
|                             | Implemented a new PTTT | Implemented new RRT / MET | Modified escalation process | Staff training / education |                                                     |         |                   |                  |                     |                                 |                                                 |                                                        |                                                                                                                                                                                                                                                                                                                                                                                                                             |                          |
| Mistry 2006 <sup>51</sup>   | ✓                      | ✓                         |                             | ✓                          | Paediatric Rapid Response Team activation criteria* | US      | 1                 | Y                | N                   | All in-patients                 | Uncontrolled before-after study (prospective)   | 11 (6 before, 5 after)                                 | Describes implementation of a PRRT with calling criteria (not defined). Looked at impact on mortality, cardiac arrests and PICU outcomes among PICU transfers. Reports absolute decreases in numbers of deaths and arrests post-intervention, but no denominator data provided or further statistical details given.                                                                                                        | 3                        |
| Demmel 2010 <sup>52</sup>   | ✓                      |                           |                             |                            | Modified Brighton PEWS (e)                          | US      | 1                 | Y                | Y                   | Haematology / oncology patients | Uncontrolled before-after study (prospective)   | Unclear (unclear, 8 after)                             | Implemented a locally modified version of the Brighton PEWS in a specialist haematology / oncology unit. Discusses challenges in the development and implementation of the tool. Refers to number of days between cardiopulmonary arrests being 299 immediately before implementation, and 1,053 days eight months after implementation – however, no denominator data or further statistical details given.                | 8                        |
| Sandhu 2010 <sup>53</sup>   |                        | ✓                         |                             |                            | Unclear                                             | UK      | 1                 | Y                | N                   | Unclear                         | Uncontrolled before-after study (retrospective) | Unclear (unclear, 3 months)                            | Conference abstract only. Reported implementing an 'outreach response team' alongside an existing 'paediatric early warning tool' (unclear which tool) in a UK tertiary centre. Reference to comparable triggering rate of PTTT before (28% of patients) and after (28% of patients) piloting the outreach team, and 2 arrests before piloting, and 0 after – but no denominator data or further statistical details given. | 8                        |
| Randhawa 2011 <sup>54</sup> | ✓                      |                           | ✓                           | ✓                          | Brighton PEWS                                       | US      | 1                 | Y                | Y                   | All in-patients                 | Uncontrolled before-after study (prospective)   | Unclear                                                | Describes implementation of the Brighton PEWS in a specialist paediatric centre. Details various cycles of change during implementation of the tool across different wards, and efforts at staff education. Reports reduction in rate of cardiopulmonary arrests post-intervention, but no absolute numbers, denominator data or further statistical details given.                                                         | 12                       |

|                             |   |   |  |   |                                                                           |    |   |   |   |   |                                 |                                                 |                                    |                                                                                                                                                                                                                                                                                                                                                                                                                                           |   |
|-----------------------------|---|---|--|---|---------------------------------------------------------------------------|----|---|---|---|---|---------------------------------|-------------------------------------------------|------------------------------------|-------------------------------------------------------------------------------------------------------------------------------------------------------------------------------------------------------------------------------------------------------------------------------------------------------------------------------------------------------------------------------------------------------------------------------------------|---|
| Camacho 2011 <sup>55</sup>  | ✓ |   |  |   | Modified Brighton PEWS (a) †                                              | US | 1 | Y | N | R | Cardiac and renal patients      | Uncontrolled before-after study (prospective)   | 8<br>(3 before, 5 after)           | Conference abstract only. Reported piloting and modifying Tucker's modified Brighton PEWS for specialist cardiac and renal population. Unclear if RRT/MET in place. Referred to there being 5 code calls in the quarter (3 months) before implementation, and 0 in the following 5 months. However, no denominator data or further statistical details given.                                                                             | 8 |
| Heyden 2012 <sup>56</sup>   | ✓ | ✓ |  |   | Paediatric Rapid Response Team activation criteria*                       | US | 1 | Y | N |   | All in-patients                 | Uncontrolled before-after study (retrospective) | 72<br>(24 before, 48 after)        | Conference abstract only. Describes implementation of an RRT in a US tertiary centre, with an associated 'broad calling criteria' (limited details given). Reports number of cardiac arrests on ward and PICU before and after intervention, and refers to increase in RRT calls over time. No denominator data or further statistical details given.                                                                                     | 7 |
| Somberg 2013                | ✓ | ✓ |  |   | Unclear                                                                   | US | 1 | N | N |   | All in-patients                 | Uncontrolled before-after study (unclear)       | Unclear                            | Conference abstract only. Reported developing and implementing a PTTT (tool not named) and RRT for a paediatric unit in a community hospital. Reference to no intubation or code calls since intervention, but no pre-intervention comparison, time frames, denominator data or further statistical details given.                                                                                                                        | 2 |
| Norville 2013 <sup>57</sup> | ✓ |   |  |   | Texas Children's Hospital (TCH) Paediatric Advanced Warning Score (PAWS)† | US | 1 | Y | Y |   | Bone marrow transplant patients | Uncontrolled before-after study (unclear)       | 23<br>(12 before, 11 after)        | Conference abstract only. Describes implementation of TCH PAWS, with amended algorithm for specialist bone marrow transplant unit. Looked at impact on code calls and RRT calls – refers to 3 code calls and 18 RRT calls pre-intervention, compared to 0 codes and 25 RRT calls post-intervention. No denominator data or further statistical details given.                                                                             | 5 |
| Ambati 2014 <sup>58</sup>   |   |   |  | ✓ | Not applicable                                                            | US | 1 | Y | Y |   | Unclear                         | Uncontrolled before-after study (unclear)       | 48<br>(12 before, 36 after)        | Conference abstract only. Reported effect of implementing a "simulation based curriculum" for clinical staff on subsequent RRT utilisation. Reference to increase in RRT calls year on year post implementation, but no denominator data or further statistical details given.                                                                                                                                                            | 3 |
| Ocholi 2014 <sup>59</sup>   | ✓ |   |  |   | Beside Paediatric Early Warning Score (PEWS)                              | UK | 1 | Y | N |   | Unclear                         | Uncontrolled before-after study (unclear)       | 12 months<br>(6 before, 6 after)   | Conference abstract only. Describes implementation of Beside PEWS in a UK tertiary centre. Looked at impact of intervention on ward outcomes and outcomes of children transferred to PICU. Reference to impact of tool on number of 'adverse incidents' (not defined) on the ward and median length of stay in PICU among PICU transfers, but no denominator data or further statistical details given.                                   | 6 |
| Fenix 2016 <sup>39</sup>    | ✓ |   |  | ✓ | Unclear                                                                   | US | 1 | Y | N | R | Two general paediatric wards    | Uncontrolled before-after study (retrospective) | 46 months<br>(16 before, 30 after) | Conference abstract only. Describes implementation of a 'Situational Awareness' tool, with integrated PTTT (unclear which tool) in a tertiary centre. Retrospective review of rates of Critical Deterioration (CD) events on two of seven general paediatric wards. Reports a significant decrease in trend and trajectory of CD events post-implementation, but no event numbers, denominator data or further statistical details given. | 6 |

1  
2  
3  
4  
5  
6  
7  
8  
9  
10  
11  
12  
13  
14  
15  
16  
17  
18  
19  
20  
21  
22  
23  
24  
25  
26  
27  
28  
29  
30  
31  
32  
33  
34  
35  
36  
37  
38  
39  
40  
41  
42  
43  
44  
45  
46

\* Indicates PTTT not fully described or validated in the published literature

† PTTT modified by local team, but exact modifications not described

MET, medical emergency team; PICU, paediatric intensive care unit; PTTT, paediatric track and trigger tool; RRT, rapid response team; UK, United Kingdom; US, United States.

For peer review only

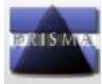

# PRISMA 2009 Checklist

| Section/topic                      | #  | Checklist item                                                                                                                                                                                                                                                                                              | Reported on page # |
|------------------------------------|----|-------------------------------------------------------------------------------------------------------------------------------------------------------------------------------------------------------------------------------------------------------------------------------------------------------------|--------------------|
| <b>TITLE</b>                       |    |                                                                                                                                                                                                                                                                                                             |                    |
| Title                              | 1  | Identify the report as a systematic review, meta-analysis, or both.                                                                                                                                                                                                                                         | 1                  |
| <b>ABSTRACT</b>                    |    |                                                                                                                                                                                                                                                                                                             |                    |
| Structured summary                 | 2  | Provide a structured summary including, as applicable: background; objectives; data sources; study eligibility criteria, participants, and interventions; study appraisal and synthesis methods; results; limitations; conclusions and implications of key findings; systematic review registration number. | 2-3                |
| <b>INTRODUCTION</b>                |    |                                                                                                                                                                                                                                                                                                             |                    |
| Rationale                          | 3  | Describe the rationale for the review in the context of what is already known.                                                                                                                                                                                                                              | 5-6                |
| Objectives                         | 4  | Provide an explicit statement of questions being addressed with reference to participants, interventions, comparisons, outcomes, and study design (PICOS).                                                                                                                                                  | 6                  |
| <b>METHODS</b>                     |    |                                                                                                                                                                                                                                                                                                             |                    |
| Protocol and registration          | 5  | Indicate if a review protocol exists, if and where it can be accessed (e.g., Web address), and, if available, provide registration information including registration number.                                                                                                                               | 7                  |
| Eligibility criteria               | 6  | Specify study characteristics (e.g., PICOS, length of follow-up) and report characteristics (e.g., years considered, language, publication status) used as criteria for eligibility, giving rationale.                                                                                                      | 7-8; Supp table 2  |
| Information sources                | 7  | Describe all information sources (e.g., databases with dates of coverage, contact with study authors to identify additional studies) in the search and date last searched.                                                                                                                                  | 7                  |
| Search                             | 8  | Present full electronic search strategy for at least one database, including any limits used, such that it could be repeated.                                                                                                                                                                               | Supp table 1       |
| Study selection                    | 9  | State the process for selecting studies (i.e., screening, eligibility, included in systematic review, and, if applicable, included in the meta-analysis).                                                                                                                                                   | 7-8                |
| Data collection process            | 10 | Describe method of data extraction from reports (e.g., piloted forms, independently, in duplicate) and any processes for obtaining and confirming data from investigators.                                                                                                                                  | 7-8                |
| Data items                         | 11 | List and define all variables for which data were sought (e.g., PICOS, funding sources) and any assumptions and simplifications made.                                                                                                                                                                       | 7                  |
| Risk of bias in individual studies | 12 | Describe methods used for assessing risk of bias of individual studies (including specification of whether this was done at the study or outcome level), and how this information is to be used in any data synthesis.                                                                                      | 8; Supp table 3    |
| Summary measures                   | 13 | State the principal summary measures (e.g., risk ratio, difference in means).                                                                                                                                                                                                                               | 8                  |
| Synthesis of results               | 14 | Describe the methods of handling data and combining results of studies, if done, including measures of consistency (e.g., $I^2$ ) for each meta-analysis.<br>For peer review only: <a href="http://bmjopen.bmj.com/site/about/guidelines.xhtml">http://bmjopen.bmj.com/site/about/guidelines.xhtml</a>      | NA                 |



# PRISMA 2009 Checklist

Page 1 of 2

| Section/topic                 | #  | Checklist item                                                                                                                                                                                           | Reported on page # |
|-------------------------------|----|----------------------------------------------------------------------------------------------------------------------------------------------------------------------------------------------------------|--------------------|
| Risk of bias across studies   | 15 | Specify any assessment of risk of bias that may affect the cumulative evidence (e.g., publication bias, selective reporting within studies).                                                             | NA                 |
| Additional analyses           | 16 | Describe methods of additional analyses (e.g., sensitivity or subgroup analyses, meta-regression), if done, indicating which were pre-specified.                                                         | NA                 |
| <b>RESULTS</b>                |    |                                                                                                                                                                                                          |                    |
| Study selection               | 17 | Give numbers of studies screened, assessed for eligibility, and included in the review, with reasons for exclusions at each stage, ideally with a flow diagram.                                          | 9                  |
| Study characteristics         | 18 | For each study, present characteristics for which data were extracted (e.g., study size, PICOS, follow-up period) and provide the citations.                                                             | 9, Tables 2-4      |
| Risk of bias within studies   | 19 | Present data on risk of bias of each study and, if available, any outcome level assessment (see item 12).                                                                                                | Tables 2-4         |
| Results of individual studies | 20 | For all outcomes considered (benefits or harms), present, for each study: (a) simple summary data for each intervention group (b) effect estimates and confidence intervals, ideally with a forest plot. | Tables 3-4         |
| Synthesis of results          | 21 | Present results of each meta-analysis done, including confidence intervals and measures of consistency.                                                                                                  | NA                 |
| Risk of bias across studies   | 22 | Present results of any assessment of risk of bias across studies (see Item 15).                                                                                                                          | NA                 |
| Additional analysis           | 23 | Give results of additional analyses, if done (e.g., sensitivity or subgroup analyses, meta-regression [see Item 16]).                                                                                    | NA                 |
| <b>DISCUSSION</b>             |    |                                                                                                                                                                                                          |                    |
| Summary of evidence           | 24 | Summarize the main findings including the strength of evidence for each main outcome; consider their relevance to key groups (e.g., healthcare providers, users, and policy makers).                     | 16-20              |
| Limitations                   | 25 | Discuss limitations at study and outcome level (e.g., risk of bias), and at review-level (e.g., incomplete retrieval of identified research, reporting bias).                                            | 16-20              |
| Conclusions                   | 26 | Provide a general interpretation of the results in the context of other evidence, and implications for future research.                                                                                  | 16-20              |
| <b>FUNDING</b>                |    |                                                                                                                                                                                                          |                    |
| Funding                       | 27 | Describe sources of funding for the systematic review and other support (e.g., supply of data); role of funders for the systematic review.                                                               | 21                 |

From: Moher D, Liberati A, Tetzlaff J, Altman DG, The PRISMA Group (2009). Preferred Reporting Items for Systematic Reviews and Meta-Analyses: The PRISMA Statement. PLoS Med 6(7): e1000097. doi:10.1371/journal.pmed1000097

For more information, visit: [www.prisma-statement.org](http://www.prisma-statement.org).  
For peer review only - <http://bmjopen.bmj.com/site/about/guidelines.xhtml>

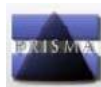

# PRISMA 2009 Checklist

For peer review only

- 1
- 2
- 3
- 4
- 5
- 6
- 7
- 8
- 9
- 10
- 11
- 12
- 13
- 14
- 15
- 16
- 17
- 18
- 19
- 20
- 21
- 22
- 23
- 24
- 25
- 26
- 27
- 28
- 29
- 30
- 31
- 32
- 33
- 34
- 35
- 36
- 37
- 38
- 39
- 40
- 41
- 42
- 43
- 44
- 45
- 46
- 47
